# Supplementary material for: Labeled-free quantitative proteomic analysis of cervical squamous cell carcinoma identifies potential protein biomarkers
Source: PeerJ. 2024 Jun 28;12:e17444. doi: 10.7717/peerj.17444 (PMC11216203; doi:10.7717/peerj.17444)
Supplement: Supplemental Information 1 [file peerj-12-17444-s001.xlsx]

## Sheet: Test_g VS Control_g显著性差异分析
Protein IDs	Gene Name	Fasta headers	Number of proteins	Peptides	Razor + unique peptides	Unique peptides	Sequence coverage [%]	Mol. weight [kDa]	LFQ intensity CC_1	LFQ intensity CC_2	LFQ intensity CC_3	LFQ intensity CC_4	LFQ intensity CC_5	LFQ intensity Cnt_1	LFQ intensity Cnt_2	LFQ intensity Cnt_3	LFQ intensity Cnt_4	LFQ intensity Cnt_5	Average Test_g	Average Control_g	Test_g/Control_g	Regulation	P value
P15924	DSP	sp|P15924|DESP_HUMAN Desmoplakin OS=Homo sapiens OX=9606 GN=DSP PE=1 SV=3	1	152	152	152	52	331.77	786060000	1687000000	757690000	1428200000	234990000	27515000	428350000	9267400	67466000	7537800	978788000	108027240	9.06057	UP	0.0124587
P25205	MCM3	sp|P25205|MCM3_HUMAN DNA replication licensing factor MCM3 OS=Homo sapiens OX=9606 GN=MCM3 PE=1 SV=3	1	29	29	29	36.9	90.98	365560000	479280000	489090000	877500000	45654000	63971000	266290000	12546000	49301000	28886000	451416800	84198800	5.36132	UP	0.0315816
P14923	JUP	sp|P14923|PLAK_HUMAN Junction plakoglobin OS=Homo sapiens OX=9606 GN=JUP PE=1 SV=3	1	33	33	30	57.7	81.744	2940600000	2797000000	899060000	944370000	476640000	151180000	1039800000	94890000	180940000	36591000	1611534000	300680200	5.35963	UP	0.0450971
P13928	ANXA8	sp|P13928|ANXA8_HUMAN Annexin A8 OS=Homo sapiens OX=9606 GN=ANXA8 PE=1 SV=3	1	13	13	1	43.7	36.881	594510000	272170000	205530000	607510000	130380000	119590000	197890000	8125500	22107000	3260400	362020000	70194580	5.15738	UP	0.0261791
P20591	MX1	sp|P20591|MX1_HUMAN Interferon-induced GTP-binding protein Mx1 OS=Homo sapiens OX=9606 GN=MX1 PE=1 SV=4	1	29	29	25	49.7	75.519	578860000	659550000	388470000	1384300000	268270000	247970000	221950000	30026000	100200000	37397000	655890000	127508600	5.14389	UP	0.0296323
Q460N5	PARP14	sp|Q460N5|PAR14_HUMAN Protein mono-ADP-ribosyltransferase PARP14 OS=Homo sapiens OX=9606 GN=PARP14 PE=1 SV=3	1	22	22	22	14	202.8	235880000	349290000	80866000	419560000	85746000	32330000	113510000	34844000	33226000	15597000	234268400	45901400	5.10373	UP	0.0281082
Q9C0C2	TNKS1BP1	sp|Q9C0C2|TB182_HUMAN 182 kDa tankyrase-1-binding protein OS=Homo sapiens OX=9606 GN=TNKS1BP1 PE=1 SV=4	1	21	21	21	14.5	181.79	91698000	60000000	85800000	182650000		26133000	36399000	22413000	13716000		105037000	24665250	4.2585	UP	0.0253801
O15533	TAPBP	sp|O15533|TPSN_HUMAN Tapasin OS=Homo sapiens OX=9606 GN=TAPBP PE=1 SV=2	1	8	8	8	27.7	47.57	670810000	643000000	272220000	1278700000	241330000	85266000	237290000	209900000	139050000	83828000	621212000	151066800	4.11217	UP	0.038363
O15460	P4HA2	sp|O15460|P4HA2_HUMAN Prolyl 4-hydroxylase subunit alpha-2 OS=Homo sapiens OX=9606 GN=P4HA2 PE=1 SV=1	1	13	13	13	31.8	60.901	135690000	72619000	168080000	255690000	47379000	24528000	54280000	45597000	20448000	20862000	135891600	33143000	4.10016	UP	0.025621
P19971	TYMP	sp|P19971|TYPH_HUMAN Thymidine phosphorylase OS=Homo sapiens OX=9606 GN=TYMP PE=1 SV=2	1	20	20	20	57.3	49.955	6295800000	4483000000	1669400000	6116700000	1648700000	2161700000	1985100000	282890000	673170000	193030000	4042720000	1059178000	3.81685	UP	0.0272808
P28288	ABCD3	sp|P28288|ABCD3_HUMAN ATP-binding cassette sub-family D member 3 OS=Homo sapiens OX=9606 GN=ABCD3 PE=1 SV=1	1	13	13	13	20.5	75.475	111780000	146290000	215190000	222810000	46439000	28245000	77880000	19128000	65838000	7008500	148501800	39619900	3.74816	UP	0.0158425
P17844	DDX5	sp|P17844|DDX5_HUMAN Probable ATP-dependent RNA helicase DDX5 OS=Homo sapiens OX=9606 GN=DDX5 PE=1 SV=1	1	25	15	15	36.3	69.147	450980000	488600000	413160000	763200000	219730000	131580000	255380000	73523000	127300000	40355000	467134000	125627600	3.7184	UP	0.00691952
Q9Y624	F11R	sp|Q9Y624|JAM1_HUMAN Junctional adhesion molecule A OS=Homo sapiens OX=9606 GN=F11R PE=1 SV=1	1	9	9	9	36.5	32.583	325430000	514140000	258170000	425340000	79254000	43109000	237900000		43548000	20360000	320466800	86229250	3.71645	UP	0.0437907
P02786	TFRC	sp|P02786|TFR1_HUMAN Transferrin receptor protein 1 OS=Homo sapiens OX=9606 GN=TFRC PE=1 SV=2	1	21	21	21	34.2	84.87	207560000	323070000	134140000	305410000	31115000	37409000	137040000	54097000	34447000	9070100	200259000	54412620	3.68038	UP	0.0376597
Q14573	ITPR3	sp|Q14573|ITPR3_HUMAN Inositol 1,4,5-trisphosphate receptor type 3 OS=Homo sapiens OX=9606 GN=ITPR3 PE=1 SV=2	1	31	31	27	14.2	304.1	109040000	143200000	139100000	266070000	29448000	17845000	106050000	15174000	12006000	37495000	137371600	37714000	3.64246	UP	0.0450586
P01889	HLA-B	sp|P01889|HLAB_HUMAN HLA class I histocompatibility antigen, B alpha chain OS=Homo sapiens OX=9606 GN=HLA-B PE=1 SV=3	1	10	4	4	33.4	40.46	270450000	365080000	95698000	551930000	213870000	67726000	152850000	43143000	98776000	50983000	299405600	82695600	3.62057	UP	0.0257078
P68366	TUBA4A	sp|P68366|TBA4A_HUMAN Tubulin alpha-4A chain OS=Homo sapiens OX=9606 GN=TUBA4A PE=1 SV=1	1	23	4	4	59.8	49.924	524220000	279370000	244620000	515540000	107590000	95348000	178680000	56958000	80115000	50694000	334268000	92359000	3.61922	UP	0.0207908
Q16706	MAN2A1	sp|Q16706|MA2A1_HUMAN Alpha-mannosidase 2 OS=Homo sapiens OX=9606 GN=MAN2A1 PE=1 SV=2	1	17	17	17	19.3	131.14	111960000	75495000	47682000	80567000	65951000	16303000	38324000	10651000	35519000	5435100	76331000	21246420	3.59265	UP	0.00221028
P48729;Q8N752	CSNK1A1; CSNK1A1L	sp|P48729|KC1A_HUMAN Casein kinase I isoform alpha OS=Homo sapiens OX=9606 GN=CSNK1A1 PE=1 SV=2;sp|Q8N752|KC1AL_HUMAN Casein kinase I isoform alpha-like OS=Homo sapiens OX=9606 GN=CSNK1A1L PE=2 SV=2	2	9	9	9	30.3	38.914	272990000	307680000	120050000	270170000	92891000	43236000	133370000		31081000	32480000	212756200	60041750	3.54347	UP	0.0263879
P34897	SHMT2	sp|P34897|GLYM_HUMAN Serine hydroxymethyltransferase, mitochondrial OS=Homo sapiens OX=9606 GN=SHMT2 PE=1 SV=3	1	20	20	20	42.7	55.992	480880000	490480000	1016300000	446660000	159070000	105720000	442270000	75829000	94024000	23335000	518678000	148235600	3.49901	UP	0.0465823
P33992	MCM5	sp|P33992|MCM5_HUMAN DNA replication licensing factor MCM5 OS=Homo sapiens OX=9606 GN=MCM5 PE=1 SV=5	1	28	28	28	43.7	82.285	1011900000	1679000000	1654500000	2008600000	417540000	265660000	1140200000		107540000	43367000	1354308000	389191750	3.4798	UP	0.0435417
Q92598	HSPH1	sp|Q92598|HS105_HUMAN Heat shock protein 105 kDa OS=Homo sapiens OX=9606 GN=HSPH1 PE=1 SV=1	1	32	31	29	47.2	96.864	419760000	263330000	370370000	297900000	147660000	130730000	163520000	34401000	84929000	20886000	299804000	86893200	3.45026	UP	0.00436901
P31947	SFN	sp|P31947|1433S_HUMAN 14-3-3 protein sigma OS=Homo sapiens OX=9606 GN=SFN PE=1 SV=1	1	19	16	16	82.3	27.774	19184000000	12190000000	6812200000	9896200000	4779100000	5954800000	7796300000	556430000	1009800000	187880000	10572300000	3101042000	3.40927	UP	0.0352742
Q9Y2W1	THRAP3	sp|Q9Y2W1|TR150_HUMAN Thyroid hormone receptor-associated protein 3 OS=Homo sapiens OX=9606 GN=THRAP3 PE=1 SV=2	1	11	11	11	11.7	108.66	93095000	74380000	68116000	79020000		18401000	28332000		24910000		78652750	23881000	3.29353	UP	0.00045661
Q9H6R4	NOL6	sp|Q9H6R4|NOL6_HUMAN Nucleolar protein 6 OS=Homo sapiens OX=9606 GN=NOL6 PE=1 SV=2	1	3	3	3	3.1	127.59	95658000	134880000	131900000	82826000	42078000	24126000	54961000		20102000	23516000	97468400	30676250	3.17732	UP	0.0145247
O75352	MPDU1	sp|O75352|MPU1_HUMAN Mannose-P-dolichol utilization defect 1 protein OS=Homo sapiens OX=9606 GN=MPDU1 PE=1 SV=2	1	2	2	2	8.1	26.638	198700000	327810000	88598000	237660000		79368000	130760000	46929000	51984000	38646000	213192000	69537400	3.06586	UP	0.019258
P43490	NAMPT	sp|P43490|NAMPT_HUMAN Nicotinamide phosphoribosyltransferase OS=Homo sapiens OX=9606 GN=NAMPT PE=1 SV=1	1	16	16	16	33.4	55.52	295830000	420090000	303840000	873710000	289470000	182590000	245310000	71319000	102240000	119240000	436588000	144139800	3.02892	UP	0.0359295
P54886	ALDH18A1	sp|P54886|P5CS_HUMAN Delta-1-pyrroline-5-carboxylate synthase OS=Homo sapiens OX=9606 GN=ALDH18A1 PE=1 SV=2	1	20	20	20	30.9	87.301	95324000	220870000	136390000	228470000	89844000	39245000	111220000	11869000	62792000	31240000	154179600	51273200	3.00702	UP	0.0173686
Q06210	GFPT1	sp|Q06210|GFPT1_HUMAN Glutamine--fructose-6-phosphate aminotransferase [isomerizing] 1 OS=Homo sapiens OX=9606 GN=GFPT1 PE=1 SV=3	1	21	21	18	36.2	78.806	289390000	216070000	142930000	253040000	93857000	83709000	130300000	20307000	80009000	17978000	199057400	66460600	2.99512	UP	0.0128593
Q9UDY2	TJP2	sp|Q9UDY2|ZO2_HUMAN Tight junction protein ZO-2 OS=Homo sapiens OX=9606 GN=TJP2 PE=1 SV=2	1	17	16	16	16.1	133.96	56602000	116390000	55952000	121520000	30480000	27744000	55203000	13302000	19952000	11442000	76188800	25528600	2.98445	UP	0.0335257
P43304	GPD2	sp|P43304|GPDM_HUMAN Glycerol-3-phosphate dehydrogenase, mitochondrial OS=Homo sapiens OX=9606 GN=GPD2 PE=1 SV=3	1	29	29	29	45.1	80.852	195480000	325510000	278340000	245790000	85777000	78811000	147340000	20262000	93796000	41555000	226179400	76352800	2.96229	UP	0.0122617
Q6PIU2	NCEH1	sp|Q6PIU2|NCEH1_HUMAN Neutral cholesterol ester hydrolase 1 OS=Homo sapiens OX=9606 GN=NCEH1 PE=1 SV=3	1	7	7	7	22.8	45.807	73026000	131030000	68570000	100630000	14174000	14654000	60550000	12726000	30331000	12992000	77486000	26250600	2.95178	UP	0.0439042
Q9UM54	MYO6	sp|Q9UM54|MYO6_HUMAN Unconventional myosin-VI OS=Homo sapiens OX=9606 GN=MYO6 PE=1 SV=4	1	32	32	32	29.4	149.69	109650000	116480000	146010000	83519000	49888000	27679000	65950000	10806000	54498000	12711000	101109400	34328800	2.94532	UP	0.0094039
Q8IYM9	TRIM22	sp|Q8IYM9|TRI22_HUMAN E3 ubiquitin-protein ligase TRIM22 OS=Homo sapiens OX=9606 GN=TRIM22 PE=1 SV=1	1	8	8	8	17.1	56.947	67674000	145940000	83124000	157770000	50433000	24726000	60842000	27085000	31156000	34538000	100988200	35669400	2.83123	UP	0.0195962
Q96HS1	PGAM5	sp|Q96HS1|PGAM5_HUMAN Serine/threonine-protein phosphatase PGAM5, mitochondrial OS=Homo sapiens OX=9606 GN=PGAM5 PE=1 SV=2	1	10	10	10	32.2	32.004	233880000	186620000	184570000	194610000	75592000	47615000	109320000	78573000	42435000	32648000	175054400	62118200	2.81809	UP	0.00544687
P08575	PTPRC	sp|P08575|PTPRC_HUMAN Receptor-type tyrosine-protein phosphatase C OS=Homo sapiens OX=9606 GN=PTPRC PE=1 SV=3	1	27	27	27	22.7	147.48	202490000	224250000	148580000	104980000	174580000	28645000	228120000	9618400	17875000	26036000	170976000	62058880	2.75506	UP	0.0475431
Q15437	SEC23B	sp|Q15437|SC23B_HUMAN Protein transport protein Sec23B OS=Homo sapiens OX=9606 GN=SEC23B PE=1 SV=2	1	17	17	14	29.1	86.478	78996000	173930000	112000000	252680000	121290000	38388000	102050000	27899000	71463000	28637000	147779200	53687400	2.75259	UP	0.0231927
P20592	MX2	sp|P20592|MX2_HUMAN Interferon-induced GTP-binding protein Mx2 OS=Homo sapiens OX=9606 GN=MX2 PE=1 SV=1	1	13	9	9	20.8	82.088	107100000	62326000	59473000	140940000	62161000		42112000		22500000	31280000	86400000	31964000	2.70304	UP	0.0488145
Q9NWT1	PAK1IP1	sp|Q9NWT1|PK1IP_HUMAN p21-activated protein kinase-interacting protein 1 OS=Homo sapiens OX=9606 GN=PAK1IP1 PE=1 SV=2	1	5	5	5	20.2	43.963	41034000	63042000	70829000	95335000		22564000	32654000	25564000	25374000	20094000	67560000	25250000	2.67564	UP	0.00414513
P68431;Q16695	H3C1; H3-4	sp|P68431|H31_HUMAN Histone H3.1 OS=Homo sapiens OX=9606 GN=H3C1 PE=1 SV=2;sp|Q16695|H31T_HUMAN Histone H3.1t OS=Homo sapiens OX=9606 GN=H3-4 PE=1 SV=3	2	9	3	1	58.1	15.404	23916000000	11958000000	39385000000	15270000000	29242000000	15274000000	355270000		9644600000	10723000000	23954200000	8999217500	2.66181	UP	0.0473107
Q96HE7	ERO1A	sp|Q96HE7|ERO1A_HUMAN ERO1-like protein alpha OS=Homo sapiens OX=9606 GN=ERO1A PE=1 SV=2	1	14	14	13	38.5	54.392	482290000	362160000	360490000	566830000	327790000	184360000	230610000	105920000	186940000	95063000	419912000	160578600	2.61499	UP	0.00108181
Q14677	CLINT1	sp|Q14677|EPN4_HUMAN Clathrin interactor 1 OS=Homo sapiens OX=9606 GN=CLINT1 PE=1 SV=1	1	11	11	11	19.5	68.259	277570000	284070000	127280000	248310000	98703000	50968000	189720000	51832000	60883000	46435000	207186600	79967600	2.59088	UP	0.0289729
O60568	PLOD3	sp|O60568|PLOD3_HUMAN Multifunctional procollagen lysine hydroxylase and glycosyltransferase LH3 OS=Homo sapiens OX=9606 GN=PLOD3 PE=1 SV=1	1	13	13	13	21.4	84.784	54027000	49634000	63191000	113320000	38458000		37571000	31127000	16006000	13962000	63726000	24666500	2.5835	UP	0.0408279
E9PAV3;Q13765;Q9BZK3	NACA; NACA	sp|E9PAV3|NACAM_HUMAN Nascent polypeptide-associated complex subunit alpha, muscle-specific form OS=Homo sapiens OX=9606 GN=NACA PE=1 SV=1;sp|Q13765|NACA_HUMAN Nascent polypeptide-associated complex subunit alpha OS=Homo sapiens OX=9606 GN=NACA PE=1 SV=1	3	4	4	4	2.6	205.42	564710000	644420000	430660000	1052400000	297830000	251940000	471690000	139190000	163970000	131570000	598004000	231672000	2.58125	UP	0.0335619
Q9Y6N5	SQOR	sp|Q9Y6N5|SQOR_HUMAN Sulfide:quinone oxidoreductase, mitochondrial OS=Homo sapiens OX=9606 GN=SQOR PE=1 SV=1	1	21	21	21	44.2	49.96	277530000	417090000	522560000	682250000	195870000	61871000	390650000	138030000	135370000	87150000	419060000	162614200	2.57702	UP	0.0399009
P61289	PSME3	sp|P61289|PSME3_HUMAN Proteasome activator complex subunit 3 OS=Homo sapiens OX=9606 GN=PSME3 PE=1 SV=1	1	7	7	7	28	29.506	39972000	51740000	57640000	117140000		30011000	31179000	19418000	32413000	17226000	66623000	26049400	2.55756	UP	0.0350828
P30040	ERP29	sp|P30040|ERP29_HUMAN Endoplasmic reticulum resident protein 29 OS=Homo sapiens OX=9606 GN=ERP29 PE=1 SV=4	1	11	11	11	35.6	28.993	855900000	825590000	279160000	627980000	441100000	192560000	419540000	75253000	305380000	198630000	605946000	238272600	2.54308	UP	0.0187059
P63173	RPL38	sp|P63173|RL38_HUMAN 60S ribosomal protein L38 OS=Homo sapiens OX=9606 GN=RPL38 PE=1 SV=2	1	6	6	6	50	8.2178	373540000	537050000	223500000	395330000	94111000	133290000	168130000	165160000	121810000	55514000	324706200	128780800	2.52139	UP	0.037735
Q9P258	RCC2	sp|Q9P258|RCC2_HUMAN Protein RCC2 OS=Homo sapiens OX=9606 GN=RCC2 PE=1 SV=2	1	20	20	20	53.8	56.084	330290000	407420000	424050000	285690000	110440000	129140000	300950000	56143000	87288000	45516000	311578000	123807400	2.51663	UP	0.0331273
P51659	HSD17B4	sp|P51659|DHB4_HUMAN Peroxisomal multifunctional enzyme type 2 OS=Homo sapiens OX=9606 GN=HSD17B4 PE=1 SV=3	1	28	28	28	49.5	79.685	401830000	429330000	370090000	434460000	172310000	113950000	311680000	56415000	185590000	58166000	361604000	145160200	2.49107	UP	0.0131806
Q8TCS8	PNPT1	sp|Q8TCS8|PNPT1_HUMAN Polyribonucleotide nucleotidyltransferase 1, mitochondrial OS=Homo sapiens OX=9606 GN=PNPT1 PE=1 SV=2	1	11	11	11	15.7	85.95	22775000	40655000	53328000	42658000		12876000	27578000		13701000	9966100	39854000	16030275	2.48617	UP	0.01872
P43307	SSR1	sp|P43307|SSRA_HUMAN Translocon-associated protein subunit alpha OS=Homo sapiens OX=9606 GN=SSR1 PE=1 SV=3	1	4	4	4	15.7	32.235	706650000	827870000	440960000	922610000	405340000	337150000	149630000	236150000	373340000	234620000	660686000	266178000	2.48212	UP	0.00728721
O15228	GNPAT	sp|O15228|GNPAT_HUMAN Dihydroxyacetone phosphate acyltransferase OS=Homo sapiens OX=9606 GN=GNPAT PE=1 SV=1	1	7	7	7	13.5	77.187	50620000	55689000	69800000	86985000	28904000	23657000	31113000		16591000		58399600	23787000	2.45511	UP	0.0405434
P22307	SCP2	sp|P22307|SCP2_HUMAN Sterol carrier protein 2 OS=Homo sapiens OX=9606 GN=SCP2 PE=1 SV=2	1	17	17	17	30.3	58.993	574730000	670520000	564340000	907710000	202410000	255200000	474940000	95637000	276670000	92290000	583942000	238947400	2.44381	UP	0.0326472
Q9BQE3	TUBA1C	sp|Q9BQE3|TBA1C_HUMAN Tubulin alpha-1C chain OS=Homo sapiens OX=9606 GN=TUBA1C PE=1 SV=1	1	26	2	2	69.9	49.895	430100000	225550000	336900000	464110000	166710000	110230000	276910000		106170000	41675000	324674000	133746250	2.42754	UP	0.0452016
P52597	HNRNPF	sp|P52597|HNRPF_HUMAN Heterogeneous nuclear ribonucleoprotein F OS=Homo sapiens OX=9606 GN=HNRNPF PE=1 SV=3	1	13	11	11	50.8	45.671	521950000	944420000	641580000	1245400000	392990000	292440000	582560000	230140000	285700000	165940000	749268000	311356000	2.40647	UP	0.0326796
P30622	CLIP1	sp|P30622|CLIP1_HUMAN CAP-Gly domain-containing linker protein 1 OS=Homo sapiens OX=9606 GN=CLIP1 PE=1 SV=2	1	32	32	30	24.7	162.24	145920000	122850000	88509000	159750000	66753000	52929000	91891000	33976000	36344000	29403000	116756400	48908600	2.38724	UP	0.0115155
P28065	PSMB9	sp|P28065|PSB9_HUMAN Proteasome subunit beta type-9 OS=Homo sapiens OX=9606 GN=PSMB9 PE=1 SV=2	1	9	9	9	46.1	23.264	179700000	221480000	149260000	464230000	178360000	110450000	130820000	95267000	113690000	49632000	238606000	99971800	2.38673	UP	0.0472766
Q9H3P7	ACBD3	sp|Q9H3P7|GCP60_HUMAN Golgi resident protein GCP60 OS=Homo sapiens OX=9606 GN=ACBD3 PE=1 SV=4	1	8	8	8	20.5	60.593	165070000	152650000	197680000	251250000	124760000	65563000	130610000	77317000	63835000	37017000	178282000	74868400	2.38127	UP	0.0046238
Q7L014	DDX46	sp|Q7L014|DDX46_HUMAN Probable ATP-dependent RNA helicase DDX46 OS=Homo sapiens OX=9606 GN=DDX46 PE=1 SV=2	1	21	21	21	22.3	117.36	103170000	147880000	75015000	170680000	73461000	46173000	91157000	23826000	57111000	21217000	114041200	47896800	2.38098	UP	0.0220002
Q9UBS4	DNAJB11	sp|Q9UBS4|DJB11_HUMAN DnaJ homolog subfamily B member 11 OS=Homo sapiens OX=9606 GN=DNAJB11 PE=1 SV=1	1	11	11	11	30.4	40.513	217300000	251140000	194140000	349970000	151900000	108320000	192400000	84345000	72900000	31385000	232890000	97870000	2.37959	UP	0.0134853
Q9Y3E7	CHMP3	sp|Q9Y3E7|CHMP3_HUMAN Charged multivesicular body protein 3 OS=Homo sapiens OX=9606 GN=CHMP3 PE=1 SV=3	1	4	4	4	18.5	25.073	238490000	214510000		127650000		78924000	119770000		45539000		193550000	81411000	2.37744	UP	0.0483941
Q70UQ0	IKBIP	sp|Q70UQ0|IKIP_HUMAN Inhibitor of nuclear factor kappa-B kinase-interacting protein OS=Homo sapiens OX=9606 GN=IKBIP PE=1 SV=1	1	10	10	10	27.4	39.309	544700000	281120000	290990000	516940000	140490000	243760000	124660000	145490000	187630000	47417000	354848000	149791400	2.36895	UP	0.0394314
P40616	ARL1	sp|P40616|ARL1_HUMAN ADP-ribosylation factor-like protein 1 OS=Homo sapiens OX=9606 GN=ARL1 PE=1 SV=1	1	4	4	4	27.6	20.417	279650000	191820000	214700000	245460000	166410000	149600000	90964000	97895000	61775000	65500000	219608000	93146800	2.35765	UP	0.00107052
Q15833	STXBP2	sp|Q15833|STXB2_HUMAN Syntaxin-binding protein 2 OS=Homo sapiens OX=9606 GN=STXBP2 PE=1 SV=2	1	12	12	12	26	66.452	243540000	158450000	142440000	168610000	118470000	70068000	139740000	34915000	38344000		166302000	70766750	2.35	UP	0.0205064
P52272	HNRNPM	sp|P52272|HNRPM_HUMAN Heterogeneous nuclear ribonucleoprotein M OS=Homo sapiens OX=9606 GN=HNRNPM PE=1 SV=3	1	40	40	40	53.6	77.515	1268900000	1532300000	1328300000	1488300000	336930000	497090000	755650000	427060000	553810000	313470000	1190946000	509416000	2.33787	UP	0.0184136
P20674	COX5A	sp|P20674|COX5A_HUMAN Cytochrome c oxidase subunit 5A, mitochondrial OS=Homo sapiens OX=9606 GN=COX5A PE=1 SV=2	1	6	6	6	33.3	16.762	434060000	512080000	255400000	471380000	251830000	88593000	195460000		191580000	183690000	384950000	164830750	2.33543	UP	0.0127609
Q9BQG0	MYBBP1A	sp|Q9BQG0|MBB1A_HUMAN Myb-binding protein 1A OS=Homo sapiens OX=9606 GN=MYBBP1A PE=1 SV=2	1	18	18	18	14.6	148.85	53853000	73932000	88314000	78772000	30438000	25459000	49251000	17852000	32518000	14686000	65061800	27953200	2.32753	UP	0.0149624
P41218	MNDA	sp|P41218|MNDA_HUMAN Myeloid cell nuclear differentiation antigen OS=Homo sapiens OX=9606 GN=MNDA PE=1 SV=1	1	10	10	10	29	45.836	148750000	372740000	451130000	150280000	231700000	122990000	173640000	102160000	128230000	57516000	270920000	116907200	2.31739	UP	0.0418346
Q99729	HNRNPAB	sp|Q99729|ROAA_HUMAN Heterogeneous nuclear ribonucleoprotein A/B OS=Homo sapiens OX=9606 GN=HNRNPAB PE=1 SV=2	1	7	7	7	20.5	36.224	187970000	93465000	168130000	278410000	75736000	105980000	78401000	56265000	67654000	40726000	160742200	69805200	2.30273	UP	0.0434481
P23919	DTYMK	sp|P23919|KTHY_HUMAN Thymidylate kinase OS=Homo sapiens OX=9606 GN=DTYMK PE=1 SV=4	1	5	5	5	21.7	23.819	63652000	75418000	56643000	103200000		49703000		23031000	24680000		74728250	3.24713e+07	2.30136	UP	0.0303134
O14933	UBE2L6	sp|O14933|UB2L6_HUMAN Ubiquitin/ISG15-conjugating enzyme E2 L6 OS=Homo sapiens OX=9606 GN=UBE2L6 PE=1 SV=4	1	6	6	6	54.9	17.769	213380000	201510000		338970000	158360000	83755000	124570000		88980000		228055000	9.91017e+07	2.30122	UP	0.0410752
Q13283	G3BP1	sp|Q13283|G3BP1_HUMAN Ras GTPase-activating protein-binding protein 1 OS=Homo sapiens OX=9606 GN=G3BP1 PE=1 SV=1	1	15	15	13	41.8	52.164	202930000	120620000	139070000	288860000	121710000	84925000	136390000	35659000	89287000	33960000	174638000	76044200	2.29653	UP	0.0302268
P05141;Q9H0C2	SLC25A5	sp|P05141|ADT2_HUMAN ADP/ATP translocase 2 OS=Homo sapiens OX=9606 GN=SLC25A5 PE=1 SV=7	2	16	16	4	43	32.852	8488800000	9583800000	6087200000	11957000000	3020400000	3086100000	6574200000	2641100000	2766500000	2000900000	7827440000	3413760000	2.29291	UP	0.034064
O76021	RSL1D1	sp|O76021|RL1D1_HUMAN Ribosomal L1 domain-containing protein 1 OS=Homo sapiens OX=9606 GN=RSL1D1 PE=1 SV=3	1	12	12	12	23.3	54.972	85517000	106400000	79552000	110050000	37441000	36506000	58174000	14879000	37127000		83792000	36671500	2.28494	UP	0.0253458
P09651;Q32P51;A0A2R8Y4L2	HNRNPA1; HNRNPA1L2	sp|P09651|ROA1_HUMAN Heterogeneous nuclear ribonucleoprotein A1 OS=Homo sapiens OX=9606 GN=HNRNPA1 PE=1 SV=5;sp|Q32P51|RA1L2_HUMAN Heterogeneous nuclear ribonucleoprotein A1-like 2 OS=Homo sapiens OX=9606 GN=HNRNPA1L2 PE=2 SV=2;sp|A0A2R8Y4L2|RA1L3_HUMAN He	3	19	18	18	51.1	38.746	3014300000	2930000000	2543600000	3777400000	2223500000	1803000000	1901800000	932400000	1039200000	703850000	2897760000	1276050000	2.27088	UP	0.00187126
O95486	SEC24A	sp|O95486|SC24A_HUMAN Protein transport protein Sec24A OS=Homo sapiens OX=9606 GN=SEC24A PE=1 SV=2	1	8	7	7	8.3	119.75	68221000	89781000	45288000	155300000	85200000	29837000	65423000	34638000	38530000	27328000	88758000	39151200	2.26706	UP	0.0352684
Q13310	PABPC4	sp|Q13310|PABP4_HUMAN Polyadenylate-binding protein 4 OS=Homo sapiens OX=9606 GN=PABPC4 PE=1 SV=1	1	17	9	8	30.3	70.782	136860000	226760000	145630000	233160000	71139000	54511000	126580000	59888000	80785000	37139000	162709800	71780600	2.26677	UP	0.0282068
P62913	RPL11	sp|P62913|RL11_HUMAN 60S ribosomal protein L11 OS=Homo sapiens OX=9606 GN=RPL11 PE=1 SV=2	1	10	10	10	53.9	20.252	1852500000	2139100000	1299300000	2213700000	1105700000	706860000	1048700000	538910000	865900000	652510000	1722060000	762576000	2.25821	UP	0.00393349
A6NHR9	SMCHD1	sp|A6NHR9|SMHD1_HUMAN Structural maintenance of chromosomes flexible hinge domain-containing protein 1 OS=Homo sapiens OX=9606 GN=SMCHD1 PE=1 SV=2	1	26	26	26	14.4	226.37	99427000	113270000	52138000	99285000	46382000	54404000	48195000	15194000	38229000	26471000	82100400	36498600	2.24941	UP	0.0182202
Q16666;Q6K0P9	IFI16	sp|Q16666|IF16_HUMAN Gamma-interferon-inducible protein 16 OS=Homo sapiens OX=9606 GN=IFI16 PE=1 SV=3	2	33	33	33	42.9	88.255	905300000	1112400000	914590000	1148300000	500030000	503690000	695000000	225320000	354170000	262910000	916124000	408218000	2.2442	UP	0.00775539
O95202	LETM1	sp|O95202|LETM1_HUMAN Mitochondrial proton/calcium exchanger protein OS=Homo sapiens OX=9606 GN=LETM1 PE=1 SV=1	1	14	14	14	21.1	83.353	217920000	151910000	119850000	136170000	79648000	71278000	124470000	47707000	47627000	23471000	141099600	62910600	2.24286	UP	0.0250003
P61604	HSPE1	sp|P61604|CH10_HUMAN 10 kDa heat shock protein, mitochondrial OS=Homo sapiens OX=9606 GN=HSPE1 PE=1 SV=2	1	8	8	8	55.9	10.932	2169100000	2076900000	2280500000	3663100000	1420600000	992090000	1630400000	822790000	787050000	991450000	2322040000	1044756000	2.22257	UP	0.0123668
O60716	CTNND1	sp|O60716|CTND1_HUMAN Catenin delta-1 OS=Homo sapiens OX=9606 GN=CTNND1 PE=1 SV=1	1	28	28	28	37.9	108.17	1175700000	966310000	502120000	876700000	403560000	316170000	559500000	253410000	313490000	326360000	784878000	353786000	2.21851	UP	0.0233615
P51532	SMARCA4	sp|P51532|SMCA4_HUMAN Transcription activator BRG1 OS=Homo sapiens OX=9606 GN=SMARCA4 PE=1 SV=2	1	23	23	13	16	184.64	113960000	91278000	163040000	65308000	60407000	49960000	68050000	22095000	68675000	14566000	98798600	44669200	2.21178	UP	0.038482
O60610	DIAPH1	sp|O60610|DIAP1_HUMAN Protein diaphanous homolog 1 OS=Homo sapiens OX=9606 GN=DIAPH1 PE=1 SV=2	1	19	19	19	18.6	141.35	194470000	189850000	156700000	167660000	96501000	87517000	141060000	32849000	82201000	21116000	161036200	72948600	2.20753	UP	0.0131209
P61165	TMEM258	sp|P61165|TM258_HUMAN Transmembrane protein 258 OS=Homo sapiens OX=9606 GN=TMEM258 PE=1 SV=1	1	1	1	1	10.1	9.0788	60914000	73285000	56981000	101740000	68425000		43118000	25530000	30136000		72269000	32928000	2.19476	UP	0.0126731
Q9BWJ5	SF3B5	sp|Q9BWJ5|SF3B5_HUMAN Splicing factor 3B subunit 5 OS=Homo sapiens OX=9606 GN=SF3B5 PE=1 SV=1	1	2	2	2	27.9	10.135	88320000	92203000	107530000	167280000	62881000	57224000	60846000		41857000	29613000	103642800	47385000	2.18725	UP	0.0303114
P49207	RPL34	sp|P49207|RL34_HUMAN 60S ribosomal protein L34 OS=Homo sapiens OX=9606 GN=RPL34 PE=1 SV=3	1	7	7	7	37.6	13.293	743480000	773840000	500760000	1032100000	294030000	356660000	528680000	112970000	461150000	106770000	668842000	313246000	2.1352	UP	0.0489841
P20645	M6PR	sp|P20645|MPRD_HUMAN Cation-dependent mannose-6-phosphate receptor OS=Homo sapiens OX=9606 GN=M6PR PE=1 SV=1	1	4	4	4	17.7	30.993	160610000	241150000	321780000	295160000	147900000	82559000	180090000	71848000	128570000	85255000	233320000	109664400	2.12758	UP	0.0152646
Q9H3N1	TMX1	sp|Q9H3N1|TMX1_HUMAN Thioredoxin-related transmembrane protein 1 OS=Homo sapiens OX=9606 GN=TMX1 PE=1 SV=1	1	7	7	7	22.5	31.791	225910000	141300000	116930000	236120000	63025000	65734000	116650000	58769000	78144000	48884000	156657000	73636200	2.12745	UP	0.0449608
Q8NBJ5	COLGALT1	sp|Q8NBJ5|GT251_HUMAN Procollagen galactosyltransferase 1 OS=Homo sapiens OX=9606 GN=COLGALT1 PE=1 SV=1	1	16	16	16	26.4	71.635	272380000	222150000	184960000	459000000	149610000	101640000	188220000	77011000	114380000	124770000	257620000	121204200	2.1255	UP	0.0447418
Q7KZ85	SUPT6H	sp|Q7KZ85|SPT6H_HUMAN Transcription elongation factor SPT6 OS=Homo sapiens OX=9606 GN=SUPT6H PE=1 SV=2	1	17	17	17	11.8	199.07	44559000	67374000	40521000	63988000	32936000	34974000	38331000	11612000	19742000	12737000	49875600	23479200	2.12425	UP	0.0166353
Q9UKK9	NUDT5	sp|Q9UKK9|NUDT5_HUMAN ADP-sugar pyrophosphatase OS=Homo sapiens OX=9606 GN=NUDT5 PE=1 SV=1	1	8	8	8	37.4	24.327	338490000	420980000	311740000	439580000	281670000	197530000	237840000	120840000	181570000	108060000	358492000	169168000	2.11915	UP	0.00130233
Q15233	NONO	sp|Q15233|NONO_HUMAN Non-POU domain-containing octamer-binding protein OS=Homo sapiens OX=9606 GN=NONO PE=1 SV=4	1	17	16	16	37.8	54.231	700580000	719920000	568570000	993880000	463310000	257360000	708340000	132770000	314990000	216540000	689252000	326000000	2.11427	UP	0.0267321
O95159	ZFPL1	sp|O95159|ZFPL1_HUMAN Zinc finger protein-like 1 OS=Homo sapiens OX=9606 GN=ZFPL1 PE=1 SV=2	1	3	3	3	11	34.114	72091000	71878000	75385000	100510000	47961000	28441000	52095000		24694000		73565000	3.50767e+07	2.09726	UP	0.0235002
P11387;Q969P6	TOP1	sp|P11387|TOP1_HUMAN DNA topoisomerase 1 OS=Homo sapiens OX=9606 GN=TOP1 PE=1 SV=2	2	19	19	19	25.4	90.725	182960000	229990000	178390000	222160000	80271000	82110000	148880000	72633000	70895000	53950000	178754200	85693600	2.08597	UP	0.0178561
P42677	RPS27	sp|P42677|RS27_HUMAN 40S ribosomal protein S27 OS=Homo sapiens OX=9606 GN=RPS27 PE=1 SV=3	1	4	4	2	40.5	9.461	633490000	679370000	364310000	704930000	222070000	239400000	435700000	227650000	229540000	117100000	520834000	249878000	2.08435	UP	0.0380851
P50914	RPL14	sp|P50914|RL14_HUMAN 60S ribosomal protein L14 OS=Homo sapiens OX=9606 GN=RPL14 PE=1 SV=4	1	4	4	4	20.9	23.432	1080200000	1241200000	870190000	1636400000	805790000	604450000	748000000	267170000	627200000	457720000	1126756000	540908000	2.08308	UP	0.00882371
O60832	DKC1	sp|O60832|DKC1_HUMAN H/ACA ribonucleoprotein complex subunit DKC1 OS=Homo sapiens OX=9606 GN=DKC1 PE=1 SV=3	1	17	17	17	44.9	57.673	412520000	305810000	222370000	283480000	110280000	156820000	229990000	76587000	91002000	86772000	266892000	128234200	2.08129	UP	0.0428065
Q9UGP8	SEC63	sp|Q9UGP8|SEC63_HUMAN Translocation protein SEC63 homolog OS=Homo sapiens OX=9606 GN=SEC63 PE=1 SV=2	1	14	14	14	23	87.996	88408000	86606000	75659000	132560000	78723000	39578000	64808000	37205000	44965000	35873000	92391200	44485800	2.07687	UP	0.00330977
P84085	ARF5	sp|P84085|ARF5_HUMAN ADP-ribosylation factor 5 OS=Homo sapiens OX=9606 GN=ARF5 PE=1 SV=2	1	6	2	2	38.9	20.529	188890000	170640000	96736000	175690000	79589000	80798000	109560000		41784000	42413000	142309000	68638750	2.0733	UP	0.0400003
O75534	CSDE1	sp|O75534|CSDE1_HUMAN Cold shock domain-containing protein E1 OS=Homo sapiens OX=9606 GN=CSDE1 PE=1 SV=2	1	20	20	20	29.8	88.884	164020000	200650000	112090000	223660000	100520000	106600000	121610000	71482000	41387000	45234000	160188000	77262600	2.07329	UP	0.0209137
P06753	TPM3	sp|P06753|TPM3_HUMAN Tropomyosin alpha-3 chain OS=Homo sapiens OX=9606 GN=TPM3 PE=1 SV=2	1	26	8	8	53	32.95	4883800000	5996500000	5807400000	7458100000	3618700000	2610800000	4378400000	2459900000	2431400000	1565800000	5552900000	2689260000	2.06484	UP	0.00650845
Q96M27	PRRC1	sp|Q96M27|PRRC1_HUMAN Protein PRRC1 OS=Homo sapiens OX=9606 GN=PRRC1 PE=1 SV=1	1	6	6	6	15.5	46.701	196840000	192830000	148280000	263170000	114750000	80286000	123880000		61975000		183174000	8.87137e+07	2.06478	UP	0.0394819
O15397	IPO8	sp|O15397|IPO8_HUMAN Importin-8 OS=Homo sapiens OX=9606 GN=IPO8 PE=1 SV=2	1	5	5	5	5.7	119.94	45698000	63121000	68319000	43572000			35081000	25781000	19522000		55177500	2.67947e+07	2.05927	UP	0.0184014
P09661	SNRPA1	sp|P09661|RU2A_HUMAN U2 small nuclear ribonucleoprotein A OS=Homo sapiens OX=9606 GN=SNRPA1 PE=1 SV=2	1	6	6	6	28.6	28.415	123410000	119600000	120410000	141890000	32474000	64397000	53860000	43885000	64739000	34336000	107556800	52243400	2.05876	UP	0.0249493
O14776	TCERG1	sp|O14776|TCRG1_HUMAN Transcription elongation regulator 1 OS=Homo sapiens OX=9606 GN=TCERG1 PE=1 SV=2	1	12	12	12	12	123.9	88676000	115860000	88028000	90060000	57883000	44975000	71967000	22265000	43048000	32103000	88101400	42871600	2.05501	UP	0.00654107
Q9Y679	AUP1	sp|Q9Y679|AUP1_HUMAN Lipid droplet-regulating VLDL assembly factor AUP1 OS=Homo sapiens OX=9606 GN=AUP1 PE=1 SV=2	1	5	5	5	11	45.786	55654000	65553000		67733000		22847000	49865000			19410000	62980000	3.07073e+07	2.05098	UP	0.0353054
P00491	PNP	sp|P00491|PNPH_HUMAN Purine nucleoside phosphorylase OS=Homo sapiens OX=9606 GN=PNP PE=1 SV=2	1	14	14	14	61.9	32.118	302240000	343960000	290280000	482350000	282230000	161780000	225500000	204200000	128960000	109760000	340212000	166040000	2.04898	UP	0.00370583
Q9H583	HEATR1	sp|Q9H583|HEAT1_HUMAN HEAT repeat-containing protein 1 OS=Homo sapiens OX=9606 GN=HEATR1 PE=1 SV=3	1	13	13	13	6.5	242.37	48223000	74932000	83551000	76171000	31034000	29497000	50681000		22140000	20285000	62782200	30650750	2.04831	UP	0.0407286
P13674	P4HA1	sp|P13674|P4HA1_HUMAN Prolyl 4-hydroxylase subunit alpha-1 OS=Homo sapiens OX=9606 GN=P4HA1 PE=1 SV=2	1	14	14	14	31.6	61.049	191740000	94394000	76037000	142100000	86260000	69267000	57034000	57151000	48774000	57039000	118106200	57853000	2.04149	UP	0.0248222
P16615;O14983	ATP2A2	sp|P16615|AT2A2_HUMAN Sarcoplasmic/endoplasmic reticulum calcium ATPase 2 OS=Homo sapiens OX=9606 GN=ATP2A2 PE=1 SV=1	2	33	33	26	33.3	114.76	782330000	807740000	756300000	1134500000	426810000	303500000	584410000	412990000	327970000	299370000	781536000	385648000	2.02655	UP	0.0129514
Q12965	MYO1E	sp|Q12965|MYO1E_HUMAN Unconventional myosin-Ie OS=Homo sapiens OX=9606 GN=MYO1E PE=1 SV=2	1	26	26	22	28.6	127.06	163510000	147040000	150220000	206550000	70193000	74871000	138270000	55183000	61085000	34551000	147502600	72792000	2.02636	UP	0.0293764
P27797	CALR	sp|P27797|CALR_HUMAN Calreticulin OS=Homo sapiens OX=9606 GN=CALR PE=1 SV=1	1	22	22	22	66.2	48.141	3731000000	3686600000	6191300000	4987800000	2989100000	2842700000	2658200000	1568000000	2243400000	1369800000	4317160000	2136420000	2.02074	UP	0.00916893
P49959	MRE11	sp|P49959|MRE11_HUMAN Double-strand break repair protein MRE11 OS=Homo sapiens OX=9606 GN=MRE11 PE=1 SV=3	1	12	12	12	21.5	80.592	331760000	326920000	363720000	480860000	305920000	232680000	247590000	90968000	168970000	155570000	361836000	179155600	2.01967	UP	0.00247239
P46776	RPL27A	sp|P46776|RL27A_HUMAN 60S ribosomal protein L27a OS=Homo sapiens OX=9606 GN=RPL27A PE=1 SV=2	1	3	3	3	22.3	16.561	965330000	1117800000	642770000	879030000	397960000	471460000	615880000		336280000	164730000	800578000	397087500	2.01612	UP	0.0460137
Q9Y3F4	STRAP	sp|Q9Y3F4|STRAP_HUMAN Serine-threonine kinase receptor-associated protein OS=Homo sapiens OX=9606 GN=STRAP PE=1 SV=1	1	9	9	9	37.4	38.438	233370000	365510000	195500000	410650000	145240000	137290000	216550000	126950000	122700000	66427000	270054000	133983400	2.01558	UP	0.0414753
P29317;P29323;P54756;Q15375;P29320;P54762;P29322;Q9UF33	EPHA2	sp|P29317|EPHA2_HUMAN Ephrin type-A receptor 2 OS=Homo sapiens OX=9606 GN=EPHA2 PE=1 SV=2	8	6	6	5	7.1	108.27	52686000	86199000		80760000		30667000	50051000		28424000		73215000	3.63807e+07	2.01247	UP	0.0415978
P49902	NT5C2	sp|P49902|5NTC_HUMAN Cytosolic purine 5-nucleotidase OS=Homo sapiens OX=9606 GN=NT5C2 PE=1 SV=1	1	9	9	9	25.3	64.969	61916000	74141000	36842000	65277000	32425000	25010000	32508000	18432000	17038000	41526000	54120200	26902800	2.01169	UP	0.0201818
P13639	EEF2	sp|P13639|EF2_HUMAN Elongation factor 2 OS=Homo sapiens OX=9606 GN=EEF2 PE=1 SV=4	1	49	49	48	62.2	95.337	3288900000	2136100000	1670600000	4280500000	1690500000	1652400000	1904400000	986370000	1257600000	699460000	2613320000	1300046000	2.01018	UP	0.0454261
Q03169	TNFAIP2	sp|Q03169|TNAP2_HUMAN Tumor necrosis factor alpha-induced protein 2 OS=Homo sapiens OX=9606 GN=TNFAIP2 PE=1 SV=2	1	14	14	14	27.4	72.66	182590000	154450000	161490000	91657000	112640000	33807000	162120000	59604000	55309000	38889000	140565400	69945800	2.00963	UP	0.0401183
P61619;Q9H9S3	SEC61A1; SEC61A2	sp|P61619|S61A1_HUMAN Protein transport protein Sec61 subunit alpha isoform 1 OS=Homo sapiens OX=9606 GN=SEC61A1 PE=1 SV=2;sp|Q9H9S3|S61A2_HUMAN Protein transport protein Sec61 subunit alpha isoform 2 OS=Homo sapiens OX=9606 GN=SEC61A2 PE=2 SV=3	2	7	7	7	14.7	52.264	192280000	427260000	268240000	384380000	408050000	128850000	282490000	136260000	182080000	107510000	336042000	167438000	2.00696	UP	0.0155183
Q92696	RABGGTA	sp|Q92696|PGTA_HUMAN Geranylgeranyl transferase type-2 subunit alpha OS=Homo sapiens OX=9606 GN=RABGGTA PE=1 SV=2	1	12	12	12	24.3	65.071	109040000	121560000	72141000	151660000	43560000	70164000	55730000	34649000	57355000	31031000	99592200	49785800	2.00041	UP	0.0399308
Q8NEW0	SLC30A7	sp|Q8NEW0|ZNT7_HUMAN Zinc transporter 7 OS=Homo sapiens OX=9606 GN=SLC30A7 PE=2 SV=1	1	5	5	5	16.2	41.625	113750000	110110000	84285000		81971000	28126000	66590000		51678000		97529000	48798000	1.99863	UP	0.0159291
Q04637;REV__Q8NEG2	EIF4G1	sp|Q04637|IF4G1_HUMAN Eukaryotic translation initiation factor 4 gamma 1 OS=Homo sapiens OX=9606 GN=EIF4G1 PE=1 SV=4	2	28	28	24	20.3	175.49	361010000	438430000	268080000	393910000	180150000	198640000	349880000	100890000	113350000	62467000	328316000	165045400	1.98925	UP	0.0459201
Q9Y6D6	ARFGEF1	sp|Q9Y6D6|BIG1_HUMAN Brefeldin A-inhibited guanine nucleotide-exchange protein 1 OS=Homo sapiens OX=9606 GN=ARFGEF1 PE=1 SV=2	1	22	22	12	12.3	208.76	157030000	168220000	98884000	125040000	103440000	50342000	107660000	50265000	68207000	51702000	130522800	65635200	1.98861	UP	0.00650652
Q07666;Q5VWX1	KHDRBS1	sp|Q07666|KHDR1_HUMAN KH domain-containing, RNA-binding, signal transduction-associated protein 1 OS=Homo sapiens OX=9606 GN=KHDRBS1 PE=1 SV=1	2	6	6	5	10.2	48.227	538790000	550110000	526590000	771810000	422480000	280530000	454070000	176190000	305300000	203220000	561956000	283862000	1.97968	UP	0.00603915
Q9NY12	GAR1	sp|Q9NY12|GAR1_HUMAN H/ACA ribonucleoprotein complex subunit 1 OS=Homo sapiens OX=9606 GN=GAR1 PE=1 SV=1	1	5	5	5	27.2	22.348	145320000	116660000	101970000	140560000	74778000	65978000	66905000	45131000	61067000	53880000	115857600	58592200	1.97736	UP	0.00293767
P21796	VDAC1	sp|P21796|VDAC1_HUMAN Voltage-dependent anion-selective channel protein 1 OS=Homo sapiens OX=9606 GN=VDAC1 PE=1 SV=2	1	16	16	16	77	30.772	1746200000	1977000000	1513200000	1871700000	941470000	663830000	1297600000	536320000	909840000	686090000	1609914000	818736000	1.96634	UP	0.00838614
Q9Y2Q9	MRPS28	sp|Q9Y2Q9|RT28_HUMAN 28S ribosomal protein S28, mitochondrial OS=Homo sapiens OX=9606 GN=MRPS28 PE=1 SV=1	1	5	5	5	29.9	20.843	61089000	116600000	63322000	97943000	51551000	38718000	31947000		40969000	47396000	78101000	39757500	1.96443	UP	0.0320464
Q9P0L0	VAPA	sp|Q9P0L0|VAPA_HUMAN Vesicle-associated membrane protein-associated protein A OS=Homo sapiens OX=9606 GN=VAPA PE=1 SV=3	1	15	15	14	58.6	27.893	825600000	587500000	527100000	762560000	274690000	351550000	507640000	109640000	351420000	198580000	595490000	303766000	1.96036	UP	0.03989
Q13043	STK4	sp|Q13043|STK4_HUMAN Serine/threonine-protein kinase 4 OS=Homo sapiens OX=9606 GN=STK4 PE=1 SV=2	1	12	12	8	26.3	55.63	85557000	122420000	111930000	124070000	62226000	50481000	74482000	56721000	34473000	43176000	101240600	51866600	1.95194	UP	0.0070071
P68104;Q5VTE0;Q05639	EEF1A1; EEF1A1P5	sp|P68104|EF1A1_HUMAN Elongation factor 1-alpha 1 OS=Homo sapiens OX=9606 GN=EEF1A1 PE=1 SV=1;sp|Q5VTE0|EF1A3_HUMAN Putative elongation factor 1-alpha-like 3 OS=Homo sapiens OX=9606 GN=EEF1A1P5 PE=5 SV=1	3	23	23	23	63.9	50.14	9620700000	6587400000	7856700000	16450000000	6076300000	5200800000	6375500000	4971300000	3960300000	3443000000	9318220000	4790180000	1.94528	UP	0.0490236
P11940;Q9H361;Q4VXU2;Q96DU9	PABPC1; PABPC3	sp|P11940|PABP1_HUMAN Polyadenylate-binding protein 1 OS=Homo sapiens OX=9606 GN=PABPC1 PE=1 SV=2;sp|Q9H361|PABP3_HUMAN Polyadenylate-binding protein 3 OS=Homo sapiens OX=9606 GN=PABPC3 PE=1 SV=2	4	26	26	17	35.5	70.67	752950000	991860000	619620000	1100700000	646580000	405500000	837040000	347460000	300950000	230060000	822342000	424202000	1.93856	UP	0.0242209
P25774	CTSS	sp|P25774|CATS_HUMAN Cathepsin S OS=Homo sapiens OX=9606 GN=CTSS PE=1 SV=3	1	7	7	7	28.7	37.495	87852000	123190000	74091000	84665000	70679000	31662000	66261000		38872000		88095400	4.55983e+07	1.93199	UP	0.0271944
P20700	LMNB1	sp|P20700|LMNB1_HUMAN Lamin-B1 OS=Homo sapiens OX=9606 GN=LMNB1 PE=1 SV=2	1	38	35	35	61.6	66.408	1632500000	2129700000	1840000000	1420800000	869320000	938700000	1556200000	369350000	700090000	529110000	1578464000	818690000	1.92804	UP	0.0336253
Q15084	PDIA6	sp|Q15084|PDIA6_HUMAN Protein disulfide-isomerase A6 OS=Homo sapiens OX=9606 GN=PDIA6 PE=1 SV=1	1	17	17	17	44.5	48.121	667920000	818630000	642210000	1293200000	673950000	353120000	645130000	364550000	510460000	260930000	819182000	426838000	1.91919	UP	0.0230425
P29692	EEF1D	sp|P29692|EF1D_HUMAN Elongation factor 1-delta OS=Homo sapiens OX=9606 GN=EEF1D PE=1 SV=5	1	11	11	10	51.2	31.121	645560000	584640000	636690000	1374700000	907600000	449500000	727820000	245320000	448680000	297240000	829838000	433712000	1.91334	UP	0.0477561
Q9Y5M8	SRPRB	sp|Q9Y5M8|SRPRB_HUMAN Signal recognition particle receptor subunit beta OS=Homo sapiens OX=9606 GN=SRPRB PE=1 SV=3	1	9	9	9	36.5	29.702	126940000	106840000	121680000	146570000	61717000	38623000	87561000		50681000		112749400	58955000	1.91247	UP	0.0488858
P61313	RPL15	sp|P61313|RL15_HUMAN 60S ribosomal protein L15 OS=Homo sapiens OX=9606 GN=RPL15 PE=1 SV=2	1	14	14	14	50	24.146	682540000	1043100000	659250000	1135900000	442100000	534260000	720820000	377560000	291220000	153480000	792578000	415468000	1.90768	UP	0.0485477
Q69YN4	VIRMA	sp|Q69YN4|VIR_HUMAN Protein virilizer homolog OS=Homo sapiens OX=9606 GN=VIRMA PE=1 SV=2	1	5	5	5	3.4	202.02	135660000	109970000	132590000	119810000	68680000	34991000	73492000		70007000		113342000	5.94967e+07	1.90501	UP	0.0266034
P32969	RPL9	sp|P32969|RL9_HUMAN 60S ribosomal protein L9 OS=Homo sapiens OX=9606 GN=RPL9 PE=1 SV=1	1	10	10	10	55.7	21.863	702860000	1205000000	693680000	874420000	764670000	533200000	544940000	292370000	498970000	360650000	848126000	446026000	1.90152	UP	0.00569705
P37802	TAGLN2	sp|P37802|TAGL2_HUMAN Transgelin-2 OS=Homo sapiens OX=9606 GN=TAGLN2 PE=1 SV=3	1	16	16	16	81.9	22.391	4575300000	4488100000	3565500000	3391300000	1814600000	2183100000	2779200000	1600600000	1438700000	1408400000	3566960000	1882000000	1.8953	UP	0.0174033
Q9Y263	PLAA	sp|Q9Y263|PLAP_HUMAN Phospholipase A-2-activating protein OS=Homo sapiens OX=9606 GN=PLAA PE=1 SV=2	1	17	17	17	26.4	87.156	58630000	41179000	60019000	97311000	41054000	34563000	31949000		29342000	30337000	59638600	31547750	1.89042	UP	0.0471151
P61009	SPCS3	sp|P61009|SPCS3_HUMAN Signal peptidase complex subunit 3 OS=Homo sapiens OX=9606 GN=SPCS3 PE=1 SV=1	1	4	4	4	21.7	20.313	453800000	546240000	350390000	580050000	381480000	148450000	409220000		229010000	196840000	462392000	245880000	1.88056	UP	0.0188451
P15880	RPS2	sp|P15880|RS2_HUMAN 40S ribosomal protein S2 OS=Homo sapiens OX=9606 GN=RPS2 PE=1 SV=2	1	11	11	11	38.9	31.324	1787600000	2039400000	1216000000	1780500000	902540000	857610000	1369100000	435080000	893260000	558220000	1545208000	822654000	1.87832	UP	0.0259888
P15311	EZR	sp|P15311|EZRI_HUMAN Ezrin OS=Homo sapiens OX=9606 GN=EZR PE=1 SV=4	1	35	24	23	55.3	69.412	1187400000	1789500000	887170000	1211200000	799030000	765440000	1125500000	315760000	682370000	243130000	1174860000	626440000	1.87545	UP	0.0489708
Q7Z3B4	NUP54	sp|Q7Z3B4|NUP54_HUMAN Nucleoporin p54 OS=Homo sapiens OX=9606 GN=NUP54 PE=1 SV=2	1	7	7	7	17	55.435	88744000	96438000	102220000	67368000	50344000	52830000	65874000	30646000	34954000	31874000	81022800	43235600	1.87398	UP	0.013118
P55265	ADAR	sp|P55265|DSRAD_HUMAN Double-stranded RNA-specific adenosine deaminase OS=Homo sapiens OX=9606 GN=ADAR PE=1 SV=4	1	23	23	23	21.5	136.06	234410000	176630000	222930000	316940000	105430000	126160000	127710000	68409000	162650000	79212000	211268000	112828200	1.87248	UP	0.0351314
P41091;Q2VIR3	EIF2S3; EIF2S3B	sp|P41091|IF2G_HUMAN Eukaryotic translation initiation factor 2 subunit 3 OS=Homo sapiens OX=9606 GN=EIF2S3 PE=1 SV=3;sp|Q2VIR3|IF2GL_HUMAN Eukaryotic translation initiation factor 2 subunit 3B OS=Homo sapiens OX=9606 GN=EIF2S3B PE=2 SV=2	2	20	20	20	51.3	51.109	714730000	578140000	508640000	868480000	451320000	362200000	558140000	213980000	290390000	243960000	624262000	333734000	1.87054	UP	0.017303
O60784	TOM1	sp|O60784|TOM1_HUMAN Target of Myb1 membrane trafficking protein OS=Homo sapiens OX=9606 GN=TOM1 PE=1 SV=2	1	7	7	7	18.3	53.818	143870000	139830000		98254000	94369000	82280000	87360000	76951000	28257000	43573000	119080750	63684200	1.86986	UP	0.0163031
Q9BYD3	MRPL4	sp|Q9BYD3|RM04_HUMAN 39S ribosomal protein L4, mitochondrial OS=Homo sapiens OX=9606 GN=MRPL4 PE=1 SV=1	1	2	2	2	7.1	34.919		31549000	42281000	38577000		23023000	21872000		15237000		37469000	20044000	1.86934	UP	0.0118302
P09012	SNRPA	sp|P09012|SNRPA_HUMAN U1 small nuclear ribonucleoprotein A OS=Homo sapiens OX=9606 GN=SNRPA PE=1 SV=3	1	6	6	6	25.9	31.279	442970000	501200000	447590000	567920000	245970000	252300000	285500000	183770000	201410000	257750000	441130000	236146000	1.86804	UP	0.00700673
P62910	RPL32	sp|P62910|RL32_HUMAN 60S ribosomal protein L32 OS=Homo sapiens OX=9606 GN=RPL32 PE=1 SV=2	1	6	6	6	34.8	15.86	205510000	305610000	229030000	336430000	191510000	149040000	233500000	152820000	102030000	42896000	253618000	136057200	1.86405	UP	0.0244332
Q13144	EIF2B5	sp|Q13144|EI2BE_HUMAN Translation initiation factor eIF-2B subunit epsilon OS=Homo sapiens OX=9606 GN=EIF2B5 PE=1 SV=3	1	7	7	7	13.6	80.379	268440000	408250000	255820000	308520000	190570000	156910000	194030000		130270000	133290000	286320000	153625000	1.86376	UP	0.0171619
Q08945	SSRP1	sp|Q08945|SSRP1_HUMAN FACT complex subunit SSRP1 OS=Homo sapiens OX=9606 GN=SSRP1 PE=1 SV=1	1	13	13	13	20.9	81.074	151560000	202990000	276070000	229680000	92685000	142520000	134130000	47433000	118360000	69175000	190597000	102323600	1.86269	UP	0.0432888
P22087	FBL	sp|P22087|FBRL_HUMAN rRNA 2-O-methyltransferase fibrillarin OS=Homo sapiens OX=9606 GN=FBL PE=1 SV=2	1	14	14	12	49.8	33.784	460800000	464300000	403280000	492070000	191350000	290250000	275740000	156090000	192350000	167880000	402360000	216462000	1.8588	UP	0.0163534
P53367	ARFIP1	sp|P53367|ARFP1_HUMAN Arfaptin-1 OS=Homo sapiens OX=9606 GN=ARFIP1 PE=1 SV=2	1	6	6	6	24.4	41.738	102460000	166710000	101970000	130260000	57471000	66721000	90403000	56610000	57836000	29688000	111774200	60251600	1.85512	UP	0.0361051
Q5SRE5	NUP188	sp|Q5SRE5|NU188_HUMAN Nucleoporin NUP188 OS=Homo sapiens OX=9606 GN=NUP188 PE=1 SV=1	1	7	7	7	4.6	196.04	29363000	48367000	45390000	35109000	43697000	19567000	21386000		24503000		40385200	2.18187e+07	1.85095	UP	0.00845145
Q9P2J5	LARS1	sp|Q9P2J5|SYLC_HUMAN Leucine--tRNA ligase, cytoplasmic OS=Homo sapiens OX=9606 GN=LARS1 PE=1 SV=2	1	20	20	20	17.6	134.46	203140000	176170000	178600000	136060000	134520000	145430000	142810000	39056000	61419000	58970000	165698000	89537000	1.85061	UP	0.0197942
Q9NR31	SAR1A	sp|Q9NR31|SAR1A_HUMAN GTP-binding protein SAR1a OS=Homo sapiens OX=9606 GN=SAR1A PE=1 SV=1	1	7	7	5	29.3	22.367	314450000	293770000	363960000	552750000	268730000	236530000	211210000	162670000	220040000	139000000	358732000	193890000	1.85018	UP	0.0160227
P52815	MRPL12	sp|P52815|RM12_HUMAN 39S ribosomal protein L12, mitochondrial OS=Homo sapiens OX=9606 GN=MRPL12 PE=1 SV=2	1	4	4	4	16.7	21.348	62029000	129130000	114120000	85130000			67480000	45526000	54973000	43126000	97602250	52776250	1.84936	UP	0.0307721
P43405;Q8NFD2	SYK	sp|P43405|KSYK_HUMAN Tyrosine-protein kinase SYK OS=Homo sapiens OX=9606 GN=SYK PE=1 SV=1	2	11	11	10	24.4	72.065	103630000	68548000	73276000	91138000	72074000	32398000	71166000		29081000		81733200	44215000	1.84854	UP	0.0306463
Q96DI7	SNRNP40	sp|Q96DI7|SNR40_HUMAN U5 small nuclear ribonucleoprotein 40 kDa protein OS=Homo sapiens OX=9606 GN=SNRNP40 PE=1 SV=1	1	13	13	13	51.5	39.31	125540000	131700000	214490000	234930000	128630000	124410000	112370000	32214000	118060000	65141000	167058000	90439000	1.84719	UP	0.0329749
Q9Y617	PSAT1	sp|Q9Y617|SERC_HUMAN Phosphoserine aminotransferase OS=Homo sapiens OX=9606 GN=PSAT1 PE=1 SV=2	1	11	11	11	33.5	40.422	145390000	106890000	133520000	104070000	53906000	60907000	89162000	54348000	31134000		108755200	58887750	1.84682	UP	0.0472788
P62906	RPL10A	sp|P62906|RL10A_HUMAN 60S ribosomal protein L10a OS=Homo sapiens OX=9606 GN=RPL10A PE=1 SV=2	1	12	12	12	59.9	24.831	1864400000	2170000000	1204000000	1982400000	1072700000	940780000	1526200000	684640000	821270000	524340000	1658700000	899446000	1.84414	UP	0.0258175
Q8N5K1	CISD2	sp|Q8N5K1|CISD2_HUMAN CDGSH iron-sulfur domain-containing protein 2 OS=Homo sapiens OX=9606 GN=CISD2 PE=1 SV=1	1	6	6	6	42.2	15.278	291990000	356360000	260180000	399230000	148920000	132100000	234630000	84642000	241500000	97275000	291336000	158029400	1.84356	UP	0.040577
Q8TDN6	BRIX1	sp|Q8TDN6|BRX1_HUMAN Ribosome biogenesis protein BRX1 homolog OS=Homo sapiens OX=9606 GN=BRIX1 PE=1 SV=2	1	7	7	7	27.2	41.401	195320000	268790000	289830000	256870000	132030000	88967000	175350000		120790000	111240000	228568000	124086750	1.842	UP	0.0240359
P84103	SRSF3	sp|P84103|SRSF3_HUMAN Serine/arginine-rich splicing factor 3 OS=Homo sapiens OX=9606 GN=SRSF3 PE=1 SV=1	1	7	6	6	32.9	19.329	1051400000	959190000	791130000	1262100000	492120000	486110000	736720000	283800000	576820000	394420000	911188000	495574000	1.83865	UP	0.0248537
Q13162	PRDX4	sp|Q13162|PRDX4_HUMAN Peroxiredoxin-4 OS=Homo sapiens OX=9606 GN=PRDX4 PE=1 SV=1	1	14	11	11	60.5	30.54	1091600000	798120000	622820000	1668100000	890390000	707970000	520180000	645170000	462270000	422520000	1014206000	551622000	1.83859	UP	0.0393626
Q99805	TM9SF2	sp|Q99805|TM9S2_HUMAN Transmembrane 9 superfamily member 2 OS=Homo sapiens OX=9606 GN=TM9SF2 PE=1 SV=1	1	10	10	10	19.3	75.775	176100000	185430000	100480000	132260000	116740000	67721000	115050000	49627000	115660000	39337000	142202000	77479000	1.83536	UP	0.0232651
Q15006	EMC2	sp|Q15006|EMC2_HUMAN ER membrane protein complex subunit 2 OS=Homo sapiens OX=9606 GN=EMC2 PE=1 SV=1	1	6	6	6	24.2	34.833	65929000	82548000	56386000	74339000	72552000	29955000	56894000		31422000	35417000	70350800	38422000	1.831	UP	0.00353777
Q9UBV2	SEL1L	sp|Q9UBV2|SE1L1_HUMAN Protein sel-1 homolog 1 OS=Homo sapiens OX=9606 GN=SEL1L PE=1 SV=3	1	10	10	10	23.6	88.754	82578000	66222000	69387000	61243000	59847000	40216000	43325000		32876000	32771000	67855400	37297000	1.81933	UP	0.000587661
Q9HD45	TM9SF3	sp|Q9HD45|TM9S3_HUMAN Transmembrane 9 superfamily member 3 OS=Homo sapiens OX=9606 GN=TM9SF3 PE=1 SV=2	1	8	8	8	18	67.887	143270000	261990000	205160000	208850000	152940000	93933000	215200000	76103000	107330000	43511000	194442000	107215400	1.81356	UP	0.0421728
P14866	HNRNPL	sp|P14866|HNRPL_HUMAN Heterogeneous nuclear ribonucleoprotein L OS=Homo sapiens OX=9606 GN=HNRNPL PE=1 SV=2	1	14	14	13	39	64.132	1054500000	1209900000	1385900000	1538800000	576760000	753330000	965640000	382920000	677410000	402030000	1153172000	636266000	1.81241	UP	0.0316584
P67812;P0C7V7	SEC11A	sp|P67812|SC11A_HUMAN Signal peptidase complex catalytic subunit SEC11A OS=Homo sapiens OX=9606 GN=SEC11A PE=1 SV=1	2	4	4	4	21.2	20.625	226930000	279810000	208500000	434920000	254570000	121070000	225020000	134600000	156960000	137470000	280946000	155024000	1.81227	UP	0.0218532
Q8TCT9	HM13	sp|Q8TCT9|HM13_HUMAN Minor histocompatibility antigen H13 OS=Homo sapiens OX=9606 GN=HM13 PE=1 SV=1	1	6	6	6	21.2	41.488	172600000	186980000	94276000	241480000	143870000	72275000	135110000		103720000	59608000	167841200	92678250	1.81101	UP	0.0473199
Q15287	RNPS1	sp|Q15287|RNPS1_HUMAN RNA-binding protein with serine-rich domain 1 OS=Homo sapiens OX=9606 GN=RNPS1 PE=1 SV=1	1	3	3	3	9.5	34.208		147830000	115540000	138020000	69472000	78656000	84183000	71103000	35785000	55756000	117715500	65096600	1.80832	UP	0.0235521
Q969N2	PIGT	sp|Q969N2|PIGT_HUMAN GPI transamidase component PIG-T OS=Homo sapiens OX=9606 GN=PIGT PE=1 SV=1	1	7	7	7	16.6	65.699	118660000	117610000	54607000	96430000	71825000	38294000	68711000		46230000	49917000	91826400	50788000	1.80803	UP	0.0322587
Q00341	HDLBP	sp|Q00341|VIGLN_HUMAN Vigilin OS=Homo sapiens OX=9606 GN=HDLBP PE=1 SV=2	1	34	34	34	29.2	141.45	433750000	312850000	342820000	637100000	331080000	269970000	238540000	293210000	198350000	138180000	411520000	227650000	1.80769	UP	0.0238582
Q9H267	VPS33B	sp|Q9H267|VP33B_HUMAN Vacuolar protein sorting-associated protein 33B OS=Homo sapiens OX=9606 GN=VPS33B PE=1 SV=2	1	9	9	9	18.3	70.584	29101000	42848000	27137000	43508000	25373000		18003000		14904000	22897000	33593400	1.86013e+07	1.80597	UP	0.0353946
P22626	HNRNPA2B1	sp|P22626|ROA2_HUMAN Heterogeneous nuclear ribonucleoproteins A2/B1 OS=Homo sapiens OX=9606 GN=HNRNPA2B1 PE=1 SV=2	1	21	21	20	53.3	37.429	4054600000	3568000000	3909100000	4105600000	2310600000	3534700000	1402000000	1559600000	1674300000	1778200000	3589580000	1989760000	1.80403	UP	0.014382
Q01085	TIAL1	sp|Q01085|TIAR_HUMAN Nucleolysin TIAR OS=Homo sapiens OX=9606 GN=TIAL1 PE=1 SV=1	1	7	7	4	25.9	41.59	107780000	129230000	109110000	156930000		45833000	98025000		65647000		125762500	69835000	1.80085	UP	0.0299859
Q92900	UPF1	sp|Q92900|RENT1_HUMAN Regulator of nonsense transcripts 1 OS=Homo sapiens OX=9606 GN=UPF1 PE=1 SV=2	1	28	28	28	31.7	124.34	311380000	321230000	199140000	325870000	198900000	188760000	213550000	106910000	150660000	94728000	271304000	150921600	1.79765	UP	0.0122614
Q9BTU6	PI4K2A	sp|Q9BTU6|P4K2A_HUMAN Phosphatidylinositol 4-kinase type 2-alpha OS=Homo sapiens OX=9606 GN=PI4K2A PE=1 SV=1	1	8	8	8	18.6	54.022	31677000	43329000	31209000	43007000	21470000	20846000	19785000		16356000		34138400	1.89957e+07	1.79717	UP	0.0347478
P13073	COX4I1	sp|P13073|COX41_HUMAN Cytochrome c oxidase subunit 4 isoform 1, mitochondrial OS=Homo sapiens OX=9606 GN=COX4I1 PE=1 SV=1	1	8	8	8	40.2	19.576	543230000	820120000	661080000	1172800000	537560000	370580000	621070000	305950000	484470000	298630000	746958000	416140000	1.79497	UP	0.0377461
P62318	SNRPD3	sp|P62318|SMD3_HUMAN Small nuclear ribonucleoprotein Sm D3 OS=Homo sapiens OX=9606 GN=SNRPD3 PE=1 SV=1	1	4	4	4	47.6	13.916	1434900000	1714000000	1200200000	1437300000	823520000	694680000	1100700000	305960000	1182000000	406440000	1321984000	737956000	1.79141	UP	0.035544
P31943	HNRNPH1	sp|P31943|HNRH1_HUMAN Heterogeneous nuclear ribonucleoprotein H OS=Homo sapiens OX=9606 GN=HNRNPH1 PE=1 SV=4	1	15	15	9	48.6	49.229	896410000	972400000	1042800000	1153700000	528740000	550600000	638510000	349090000	616460000	423110000	918810000	515554000	1.78218	UP	0.00999888
P13693;Q56UQ5;Q9HAU6	TPT1	sp|P13693|TCTP_HUMAN Translationally-controlled tumor protein OS=Homo sapiens OX=9606 GN=TPT1 PE=1 SV=1	3	6	6	6	32.6	19.595	1064700000	763120000	891800000	1294100000	795340000	561460000	776510000	510640000	505200000	345250000	961812000	539812000	1.78175	UP	0.00798973
P62263	RPS14	sp|P62263|RS14_HUMAN 40S ribosomal protein S14 OS=Homo sapiens OX=9606 GN=RPS14 PE=1 SV=3	1	7	7	7	40.4	16.273	2022600000	2721800000	1472700000	2395300000	1168500000	1119700000	1688500000	619030000	1297800000	782890000	1956180000	1101584000	1.77579	UP	0.0375052
P35658	NUP214	sp|P35658|NU214_HUMAN Nuclear pore complex protein Nup214 OS=Homo sapiens OX=9606 GN=NUP214 PE=1 SV=2	1	12	12	12	6.9	213.62	99916000	141260000	108690000	132650000	96987000	54055000	96518000		64461000	46374000	115900600	65352000	1.77348	UP	0.0086163
P60842	EIF4A1	sp|P60842|IF4A1_HUMAN Eukaryotic initiation factor 4A-I OS=Homo sapiens OX=9606 GN=EIF4A1 PE=1 SV=1	1	22	18	10	51.5	46.153	1109400000	1289600000	786880000	1523600000	615170000	619070000	980930000	483500000	513810000	405980000	1064930000	600658000	1.77294	UP	0.0429726
Q9HB90;Q9NQL2	RRAGC; RRAGD	sp|Q9HB90|RRAGC_HUMAN Ras-related GTP-binding protein C OS=Homo sapiens OX=9606 GN=RRAGC PE=1 SV=1;sp|Q9NQL2|RRAGD_HUMAN Ras-related GTP-binding protein D OS=Homo sapiens OX=9606 GN=RRAGD PE=1 SV=1	2	7	7	7	20.6	44.223	89198000	87987000	62837000	68481000	50630000	45846000	42406000	30427000		43466000	71826600	40536250	1.77191	UP	0.0100578
O96008	TOMM40	sp|O96008|TOM40_HUMAN Mitochondrial import receptor subunit TOM40 homolog OS=Homo sapiens OX=9606 GN=TOMM40 PE=1 SV=1	1	5	5	5	13	37.893	147840000	168320000	113990000	185380000	77382000	68631000	138500000	75577000	65492000	43089000	138582400	78257800	1.77084	UP	0.0431991
Q08379	GOLGA2	sp|Q08379|GOGA2_HUMAN Golgin subfamily A member 2 OS=Homo sapiens OX=9606 GN=GOLGA2 PE=1 SV=3	1	15	15	14	17.4	113.08	44835000	54686000	53207000	56584000	48675000	31555000	41911000	18582000	24560000		51597400	29152000	1.76994	UP	0.00290947
Q9HD20	ATP13A1	sp|Q9HD20|AT131_HUMAN Endoplasmic reticulum transmembrane helix translocase OS=Homo sapiens OX=9606 GN=ATP13A1 PE=1 SV=2	1	20	20	20	18.4	132.95	122360000	74033000	65923000	136940000	96136000	58017000	85863000	35840000	59464000	41008000	99078400	56038400	1.76804	UP	0.0289605
Q86XP3	DDX42	sp|Q86XP3|DDX42_HUMAN ATP-dependent RNA helicase DDX42 OS=Homo sapiens OX=9606 GN=DDX42 PE=1 SV=1	1	11	11	11	16.8	102.97	61232000	64839000	72960000	93304000	71123000	41605000	61619000	28455000	52606000	21397000	72691600	41136400	1.76709	UP	0.00935285
P62826	RAN	sp|P62826|RAN_HUMAN GTP-binding nuclear protein Ran OS=Homo sapiens OX=9606 GN=RAN PE=1 SV=3	1	12	12	12	44	24.423	2097100000	2420100000	2174400000	2555200000	2435900000	2012000000	1335800000	1190000000	1038800000	1046800000	2336540000	1324680000	1.76385	UP	0.000969875
P61326	MAGOH	sp|P61326|MGN_HUMAN Protein mago nashi homolog OS=Homo sapiens OX=9606 GN=MAGOH PE=1 SV=1	1	8	8	1	62.3	17.163	273790000	385690000	295270000	512540000	214720000	210610000	234390000	139340000	233490000	139440000	336402000	191454000	1.75709	UP	0.032766
Q9P2E9	RRBP1	sp|Q9P2E9|RRBP1_HUMAN Ribosome-binding protein 1 OS=Homo sapiens OX=9606 GN=RRBP1 PE=1 SV=5	1	44	44	43	37.1	152.45	387280000	358430000	352850000	557670000	534400000	267820000	345430000	222470000	302180000	109750000	438126000	249530000	1.7558	UP	0.0138926
P46060	RANGAP1	sp|P46060|RAGP1_HUMAN Ran GTPase-activating protein 1 OS=Homo sapiens OX=9606 GN=RANGAP1 PE=1 SV=1	1	13	13	13	26.4	63.541	205540000	227730000	216020000	282280000	139090000	148030000	198910000	75799000	123760000	63619000	214132000	122023600	1.75484	UP	0.0256293
Q14019	COTL1	sp|Q14019|COTL1_HUMAN Coactosin-like protein OS=Homo sapiens OX=9606 GN=COTL1 PE=1 SV=3	1	9	9	9	66.2	15.945	1077800000	1488000000	962670000	952460000	1190000000	901410000	1202300000	343210000	417110000	369760000	1134186000	646758000	1.75365	UP	0.0396843
O60264	SMARCA5	sp|O60264|SMCA5_HUMAN SWI/SNF-related matrix-associated actin-dependent regulator of chromatin subfamily A member 5 OS=Homo sapiens OX=9606 GN=SMARCA5 PE=1 SV=1	1	28	28	16	28.9	121.9	158960000	237590000	233220000	197340000	101200000	126840000	171660000	68240000	102090000	61412000	185662000	106048400	1.75073	UP	0.0399268
Q12905	ILF2	sp|Q12905|ILF2_HUMAN Interleukin enhancer-binding factor 2 OS=Homo sapiens OX=9606 GN=ILF2 PE=1 SV=2	1	14	14	14	45.6	43.062	569170000	514890000	739750000	455880000	326120000	368100000	330590000	223510000	336590000	231610000	521162000	298080000	1.7484	UP	0.0168111
P25398	RPS12	sp|P25398|RS12_HUMAN 40S ribosomal protein S12 OS=Homo sapiens OX=9606 GN=RPS12 PE=1 SV=3	1	7	7	7	53.8	14.515	2515000000	2762700000	1938300000	2565400000	1896100000	1425000000	2007500000	826010000	1461000000	976630000	2335500000	1339228000	1.74392	UP	0.00640282
P51812;Q9UK32;Q15349;O15021;O60307;Q96GX5;Q9Y2H9	RPS6KA3	sp|P51812|KS6A3_HUMAN Ribosomal protein S6 kinase alpha-3 OS=Homo sapiens OX=9606 GN=RPS6KA3 PE=1 SV=1	7	14	14	10	22.8	83.735	158690000	150460000	110440000	129430000	97882000	64193000	115830000	69787000	68289000	53768000	129380400	74373400	1.73961	UP	0.00815976
Q96A33	CCDC47	sp|Q96A33|CCD47_HUMAN PAT complex subunit CCDC47 OS=Homo sapiens OX=9606 GN=CCDC47 PE=1 SV=1	1	12	12	12	24.4	55.873	141590000	194390000	177350000	193080000	90381000	86730000	139040000	40827000	116360000	75102000	159358200	91611800	1.73949	UP	0.0312441
O75494;Q8WXF0	SRSF10	sp|O75494|SRS10_HUMAN Serine/arginine-rich splicing factor 10 OS=Homo sapiens OX=9606 GN=SRSF10 PE=1 SV=1	2	4	4	4	13	31.3	151470000	168040000	86983000	181420000	85773000	90678000	62158000	56252000	84831000	93619000	134737200	77507600	1.73837	UP	0.0298545
P09497	CLTB	sp|P09497|CLCB_HUMAN Clathrin light chain B OS=Homo sapiens OX=9606 GN=CLTB PE=1 SV=1	1	9	9	9	25.3	25.19	360770000	300320000	370780000	504720000	239310000	209710000	277050000	179190000	182330000	173580000	355180000	204372000	1.73791	UP	0.0140309
Q14764	MVP	sp|Q14764|MVP_HUMAN Major vault protein OS=Homo sapiens OX=9606 GN=MVP PE=1 SV=4	1	32	32	32	42.1	99.326	586620000	451130000	492990000	525370000	471720000	213710000	556170000	242940000	275550000	168880000	505566000	291450000	1.73466	UP	0.0182747
P61421	ATP6V0D1	sp|P61421|VA0D1_HUMAN V-type proton ATPase subunit d 1 OS=Homo sapiens OX=9606 GN=ATP6V0D1 PE=1 SV=1	1	7	7	7	24.5	40.329	126690000	136150000	102250000	168070000	95930000	65760000	132850000	45657000	74493000	44380000	125818000	72628000	1.73236	UP	0.0329523
P26641	EEF1G	sp|P26641|EF1G_HUMAN Elongation factor 1-gamma OS=Homo sapiens OX=9606 GN=EEF1G PE=1 SV=3	1	19	19	19	38.9	50.118	3295800000	3160900000	3332100000	5729900000	3982100000	2259400000	3888700000	1644600000	2175700000	1301900000	3900160000	2254060000	1.73028	UP	0.0359043
P55008	AIF1	sp|P55008|AIF1_HUMAN Allograft inflammatory factor 1 OS=Homo sapiens OX=9606 GN=AIF1 PE=1 SV=1	1	4	4	4	29.9	16.703	427440000	464040000	234240000	287180000	296060000	187280000	288770000		200030000	116600000	341792000	198170000	1.72474	UP	0.0447748
P10809	HSPD1	sp|P10809|CH60_HUMAN 60 kDa heat shock protein, mitochondrial OS=Homo sapiens OX=9606 GN=HSPD1 PE=1 SV=2	1	40	40	40	67.4	61.054	3348500000	3685300000	3284600000	5515900000	1953700000	2191500000	2976100000	1368000000	2331400000	1455200000	3557600000	2064440000	1.72328	UP	0.0492642
P60866	RPS20	sp|P60866|RS20_HUMAN 40S ribosomal protein S20 OS=Homo sapiens OX=9606 GN=RPS20 PE=1 SV=1	1	4	4	4	28.6	13.373	2206800000	2643800000	1855100000	2937700000	1640500000	1356800000	2240200000	782520000	1353600000	826040000	2256780000	1311832000	1.72033	UP	0.0291574
Q8N1F7	NUP93	sp|Q8N1F7|NUP93_HUMAN Nuclear pore complex protein Nup93 OS=Homo sapiens OX=9606 GN=NUP93 PE=1 SV=2	1	26	26	26	35.3	93.487	171010000	171790000	169950000	184410000	112500000	95355000	144440000	73029000	95575000	62885000	161932000	94256800	1.71799	UP	0.00719294
P50453	SERPINB9	sp|P50453|SPB9_HUMAN Serpin B9 OS=Homo sapiens OX=9606 GN=SERPINB9 PE=1 SV=1	1	16	15	14	48.1	42.403	631630000	517480000	328760000	416590000	344100000	343450000	423160000	175880000	240470000	120860000	447712000	260764000	1.71692	UP	0.0455845
O94906	PRPF6	sp|O94906|PRP6_HUMAN Pre-mRNA-processing factor 6 OS=Homo sapiens OX=9606 GN=PRPF6 PE=1 SV=1	1	20	20	20	24.1	106.92	173690000	185630000	195460000	211560000	98519000	130190000	136900000	50177000	113840000	73240000	172971800	100869400	1.71481	UP	0.0235606
P12270	TPR	sp|P12270|TPR_HUMAN Nucleoprotein TPR OS=Homo sapiens OX=9606 GN=TPR PE=1 SV=3	1	57	57	57	27.1	267.29	145730000	176410000	171850000	157410000	114730000	88704000	130020000	49061000	112690000	66497000	153226000	89394400	1.71404	UP	0.00849671
Q9Y5S9	RBM8A	sp|Q9Y5S9|RBM8A_HUMAN RNA-binding protein 8A OS=Homo sapiens OX=9606 GN=RBM8A PE=1 SV=1	1	7	7	7	40.8	19.889	507470000	537330000	484620000	550590000	263340000	382540000	316840000	106680000	287790000		468670000	273462500	1.71384	UP	0.0428227
Q9H1E3	NUCKS1	sp|Q9H1E3|NUCKS_HUMAN Nuclear ubiquitous casein and cyclin-dependent kinase substrate 1 OS=Homo sapiens OX=9606 GN=NUCKS1 PE=1 SV=1	1	5	5	5	24.3	27.296	243970000	171690000	194640000	181880000		132880000	92078000		121990000		198045000	1.15649e+08	1.71246	UP	0.0122614
Q15366	PCBP2	sp|Q15366|PCBP2_HUMAN Poly(rC)-binding protein 2 OS=Homo sapiens OX=9606 GN=PCBP2 PE=1 SV=1	1	7	6	5	32.6	38.58	814210000	726510000	591120000	817350000	518510000	336670000	821450000	264780000	341510000	260840000	693540000	405050000	1.71223	UP	0.0447763
P11021	HSPA5	sp|P11021|BIP_HUMAN Endoplasmic reticulum chaperone BiP OS=Homo sapiens OX=9606 GN=HSPA5 PE=1 SV=2	1	30	29	29	48.9	72.332	1912000000	2311500000	1848400000	3667900000	2134800000	1333800000	1933300000	1020200000	1788000000	863870000	2374920000	1387834000	1.71124	UP	0.0364212
P35606	COPB2	sp|P35606|COPB2_HUMAN Coatomer subunit beta OS=Homo sapiens OX=9606 GN=COPB2 PE=1 SV=2	1	27	27	27	34.3	102.49	483750000	399720000	446950000	550440000	430260000	250730000	362490000	296390000	299860000	141250000	462224000	270144000	1.71103	UP	0.00272943
Q9NVP1	DDX18	sp|Q9NVP1|DDX18_HUMAN ATP-dependent RNA helicase DDX18 OS=Homo sapiens OX=9606 GN=DDX18 PE=1 SV=2	1	10	10	10	17.9	75.406	70751000	99061000	87865000	93507000	59070000	56534000	49287000	56038000	42242000	36428000	82050800	48105800	1.70563	UP	0.00376817
Q12907	LMAN2	sp|Q12907|LMAN2_HUMAN Vesicular integral-membrane protein VIP36 OS=Homo sapiens OX=9606 GN=LMAN2 PE=1 SV=1	1	14	14	14	49.7	40.228	575900000	599420000	461820000	824450000	591670000	371810000	446070000	331800000	370810000	274030000	610652000	358904000	1.70144	UP	0.00485958
Q99426	TBCB	sp|Q99426|TBCB_HUMAN Tubulin-folding cofactor B OS=Homo sapiens OX=9606 GN=TBCB PE=1 SV=2	1	7	7	7	31.6	27.325	353480000	388280000	294760000	308120000	215620000	270530000	169620000	148790000	81436000	248740000	312052000	183823200	1.69757	UP	0.0218269
Q15363	TMED2	sp|Q15363|TMED2_HUMAN Transmembrane emp24 domain-containing protein 2 OS=Homo sapiens OX=9606 GN=TMED2 PE=1 SV=1	1	6	6	6	30.8	22.761	633160000	687060000	620020000	960530000	528540000	327090000	488460000	248230000	655600000	303140000	685862000	404504000	1.69556	UP	0.0273123
P21127;Q9UQ88	CDK11B; CDK11A	sp|P21127|CD11B_HUMAN Cyclin-dependent kinase 11B OS=Homo sapiens OX=9606 GN=CDK11B PE=1 SV=4;sp|Q9UQ88|CD11A_HUMAN Cyclin-dependent kinase 11A OS=Homo sapiens OX=9606 GN=CDK11A PE=1 SV=4	2	13	13	12	16.6	92.619	98625000	147590000	87802000	79485000	95049000	62006000	68088000		50015000	59932000	101710200	60010250	1.69488	UP	0.0200818
P26368	U2AF2	sp|P26368|U2AF2_HUMAN Splicing factor U2AF 65 kDa subunit OS=Homo sapiens OX=9606 GN=U2AF2 PE=1 SV=4	1	9	9	9	28.6	53.5	402000000	346460000	272830000	391220000	220610000	203590000	269350000	88697000	262850000	139890000	326624000	192875400	1.69345	UP	0.0268705
O43747	AP1G1	sp|O43747|AP1G1_HUMAN AP-1 complex subunit gamma-1 OS=Homo sapiens OX=9606 GN=AP1G1 PE=1 SV=5	1	16	16	16	20.1	91.35	295500000	265390000	146020000	235430000	152470000	123880000	179650000	118680000	148560000	76203000	218962000	129394600	1.6922	UP	0.0320475
P35637	FUS	sp|P35637|FUS_HUMAN RNA-binding protein FUS OS=Homo sapiens OX=9606 GN=FUS PE=1 SV=1	1	9	9	7	16.7	53.425	577670000	408340000	288200000	555810000	306570000	251950000	365730000	187450000	246820000	210840000	427318000	252558000	1.69196	UP	0.0329491
Q92616	GCN1	sp|Q92616|GCN1_HUMAN eIF-2-alpha kinase activator GCN1 OS=Homo sapiens OX=9606 GN=GCN1 PE=1 SV=7	1	59	59	59	24.2	292.71	3224300000	2969400000	3607500000	5369100000	2550900000	2383500000	3018500000	1174400000	2103400000	1794700000	3544240000	2094900000	1.69184	UP	0.035935
P61221	ABCE1	sp|P61221|ABCE1_HUMAN ATP-binding cassette sub-family E member 1 OS=Homo sapiens OX=9606 GN=ABCE1 PE=1 SV=1	1	16	16	16	34.9	67.314	94630000	74575000	93748000	157130000	79701000	58032000	77153000	58311000	63565000	38678000	99956800	59147800	1.68995	UP	0.0346074
P18085	ARF4	sp|P18085|ARF4_HUMAN ADP-ribosylation factor 4 OS=Homo sapiens OX=9606 GN=ARF4 PE=1 SV=3	1	8	8	4	50.6	20.511	5133000000	3466800000	3998600000	4133300000	2742500000	2723700000	2467500000	2064800000	2515500000	1775200000	3894840000	2309340000	1.68656	UP	0.00614646
Q09028	RBBP4	sp|Q09028|RBBP4_HUMAN Histone-binding protein RBBP4 OS=Homo sapiens OX=9606 GN=RBBP4 PE=1 SV=3	1	14	14	8	46.1	47.655	646160000	608480000	763270000	648650000	532490000	515160000	538900000	343320000	324350000	180820000	639810000	380510000	1.68145	UP	0.00919229
Q13217	DNAJC3	sp|Q13217|DNJC3_HUMAN DnaJ homolog subfamily C member 3 OS=Homo sapiens OX=9606 GN=DNAJC3 PE=1 SV=1	1	7	7	7	18.3	57.579	73321000	111860000	64990000	69852000	68297000	35267000	75279000		35438000	38930000	77664000	46228500	1.68	UP	0.0462988
P62995	TRA2B	sp|P62995|TRA2B_HUMAN Transformer-2 protein homolog beta OS=Homo sapiens OX=9606 GN=TRA2B PE=1 SV=1	1	7	7	6	23.6	33.665	264220000	371470000	252510000	276460000	174100000	178740000	216640000	87559000	221440000	93108000	267752000	159497400	1.67872	UP	0.0358007
Q15459	SF3A1	sp|Q15459|SF3A1_HUMAN Splicing factor 3A subunit 1 OS=Homo sapiens OX=9606 GN=SF3A1 PE=1 SV=1	1	21	21	21	30.1	88.885	244430000	307660000	218320000	273610000	186030000	150020000	218670000	100650000	164840000	98577000	246010000	146551400	1.67866	UP	0.0119376
O43143	DHX15	sp|O43143|DHX15_HUMAN ATP-dependent RNA helicase DHX15 OS=Homo sapiens OX=9606 GN=DHX15 PE=1 SV=2	1	28	28	27	41.1	90.932	513530000	701670000	518200000	564730000	382450000	434220000	427750000	229690000	306660000	200170000	536116000	319698000	1.67695	UP	0.0155754
P40763	STAT3	sp|P40763|STAT3_HUMAN Signal transducer and activator of transcription 3 OS=Homo sapiens OX=9606 GN=STAT3 PE=1 SV=2	1	24	24	24	37.4	88.067	187000000	231150000	184930000	396660000	232850000	124350000	208520000	157170000	124230000	121330000	246518000	147120000	1.67563	UP	0.0469179
Q16629	SRSF7	sp|Q16629|SRSF7_HUMAN Serine/arginine-rich splicing factor 7 OS=Homo sapiens OX=9606 GN=SRSF7 PE=1 SV=1	1	8	8	7	32.4	27.366	391930000	491830000	319760000	583600000	295600000	244330000	334870000	117340000	294880000	252050000	416544000	248694000	1.67493	UP	0.0329015
Q13177	PAK2	sp|Q13177|PAK2_HUMAN Serine/threonine-protein kinase PAK 2 OS=Homo sapiens OX=9606 GN=PAK2 PE=1 SV=3	1	18	18	13	40.5	58.042	427300000	515540000	342230000	437470000	307670000	335070000	393440000	149120000	228770000	106000000	406042000	242480000	1.67454	UP	0.0373317
O95347	SMC2	sp|O95347|SMC2_HUMAN Structural maintenance of chromosomes protein 2 OS=Homo sapiens OX=9606 GN=SMC2 PE=1 SV=2	1	13	13	13	14.1	135.65	59917000	59831000	76908000	60393000	56486000	38238000	38084000		36068000		62707000	3.74633e+07	1.67382	UP	0.00200692
Q5T1M5	FKBP15	sp|Q5T1M5|FKB15_HUMAN FK506-binding protein 15 OS=Homo sapiens OX=9606 GN=FKBP15 PE=1 SV=2	1	12	12	12	12.1	133.63	68205000	97447000	60485000	90959000		37702000	62042000	48658000	51081000	37588000	79274000	47414200	1.67195	UP	0.011371
Q9UI12	ATP6V1H	sp|Q9UI12|VATH_HUMAN V-type proton ATPase subunit H OS=Homo sapiens OX=9606 GN=ATP6V1H PE=1 SV=1	1	10	10	10	24	55.882	137330000	86245000	85908000	124810000	73605000	82959000	65251000	70611000	53830000	31248000	101579600	60779800	1.67127	UP	0.0276109
P45880	VDAC2	sp|P45880|VDAC2_HUMAN Voltage-dependent anion-selective channel protein 2 OS=Homo sapiens OX=9606 GN=VDAC2 PE=1 SV=2	1	15	15	15	68.7	31.566	2227300000	2708200000	1884700000	2329200000	1167500000	1255300000	2033800000	712030000	1208000000	969750000	2063380000	1235776000	1.6697	UP	0.041575
Q92538	GBF1	sp|Q92538|GBF1_HUMAN Golgi-specific brefeldin A-resistance guanine nucleotide exchange factor 1 OS=Homo sapiens OX=9606 GN=GBF1 PE=1 SV=2	1	13	13	13	8.7	206.44	29773000	26104000	39640000	52070000	27552000	23743000	27930000	16713000	23085000	13494000	35027800	20993000	1.66855	UP	0.0345796
P15531	NME1	sp|P15531|NDKA_HUMAN Nucleoside diphosphate kinase A OS=Homo sapiens OX=9606 GN=NME1 PE=1 SV=1	1	9	4	4	65.1	17.149	330110000	556160000	439060000	582340000	343710000	290560000	421210000	199960000	254680000	185060000	450276000	270294000	1.66587	UP	0.0279348
A5YKK6	CNOT1	sp|A5YKK6|CNOT1_HUMAN CCR4-NOT transcription complex subunit 1 OS=Homo sapiens OX=9606 GN=CNOT1 PE=1 SV=2	1	30	30	30	14.5	266.94	133700000	135760000	104400000	119260000	74090000	73475000	111710000	40608000	72395000	43507000	113442000	68339000	1.65999	UP	0.0301794
Q01081;Q8WU68	U2AF1	sp|Q01081|U2AF1_HUMAN Splicing factor U2AF 35 kDa subunit OS=Homo sapiens OX=9606 GN=U2AF1 PE=1 SV=3	2	6	6	6	32.5	27.872	298950000	369840000	262900000	410990000	171050000	205320000	268580000	107980000	209270000	121270000	302746000	182484000	1.65903	UP	0.0478865
P49792;Q99666;O14715;P0DJD0;P0DJD1	RANBP2	sp|P49792|RBP2_HUMAN E3 SUMO-protein ligase RanBP2 OS=Homo sapiens OX=9606 GN=RANBP2 PE=1 SV=2	5	36	36	21	15	358.2	64790000	61172000	114310000	97284000	60332000	52408000	61920000	23934000	53748000	48144000	79577600	48030800	1.6568	UP	0.0389538
P62888	RPL30	sp|P62888|RL30_HUMAN 60S ribosomal protein L30 OS=Homo sapiens OX=9606 GN=RPL30 PE=1 SV=2	1	8	8	8	67	12.784	831270000	1023200000	529670000	1134400000	752710000	417120000	759610000	379870000	574360000	448850000	854250000	515962000	1.65565	UP	0.0279485
O60506	SYNCRIP	sp|O60506|HNRPQ_HUMAN Heterogeneous nuclear ribonucleoprotein Q OS=Homo sapiens OX=9606 GN=SYNCRIP PE=1 SV=2	1	23	17	17	44.5	69.602	805460000	929400000	853770000	986060000	582530000	511260000	783140000	404630000	501030000	311580000	831444000	502328000	1.65518	UP	0.0140714
Q92841	DDX17	sp|Q92841|DDX17_HUMAN Probable ATP-dependent RNA helicase DDX17 OS=Homo sapiens OX=9606 GN=DDX17 PE=1 SV=2	1	33	33	23	42.4	80.272	653280000	785200000	689830000	759350000	430370000	407570000	665320000	251030000	398930000	284840000	663606000	401538000	1.65266	UP	0.0260644
Q15005	SPCS2	sp|Q15005|SPCS2_HUMAN Signal peptidase complex subunit 2 OS=Homo sapiens OX=9606 GN=SPCS2 PE=1 SV=3	1	8	8	8	36.3	25.003	592230000	468230000	520780000	776240000	473000000	238420000	492610000	232540000	427360000	322440000	566096000	342674000	1.652	UP	0.0197029
P26639	TARS1	sp|P26639|SYTC_HUMAN Threonine--tRNA ligase 1, cytoplasmic OS=Homo sapiens OX=9606 GN=TARS1 PE=1 SV=3	1	24	24	22	41.4	83.434	212290000	212690000	166940000	252610000	192740000	123260000	197640000	102540000	124760000	80238000	207454000	125687600	1.65055	UP	0.00970114
O00203;Q13367	AP3B1	sp|O00203|AP3B1_HUMAN AP-3 complex subunit beta-1 OS=Homo sapiens OX=9606 GN=AP3B1 PE=1 SV=3	2	17	17	17	18.5	121.32	141480000	93776000	81800000	148170000	107430000	83389000	88913000	36979000	79861000	58060000	114531200	69440400	1.64935	UP	0.0240647
P23246	SFPQ	sp|P23246|SFPQ_HUMAN Splicing factor, proline- and glutamine-rich OS=Homo sapiens OX=9606 GN=SFPQ PE=1 SV=2	1	22	22	21	32.4	76.149	792300000	1009500000	868020000	1071000000	631600000	519120000	852190000	336620000	549310000	395750000	874484000	530598000	1.64811	UP	0.0200682
P14625	HSP90B1	sp|P14625|ENPL_HUMAN Endoplasmin OS=Homo sapiens OX=9606 GN=HSP90B1 PE=1 SV=1	1	49	49	39	57.7	92.468	4210000000	4636700000	3902100000	6424800000	4957200000	3436400000	3727000000	2213900000	3448000000	1818100000	4826160000	2928680000	1.6479	UP	0.0114268
P11717	IGF2R	sp|P11717|MPRI_HUMAN Cation-independent mannose-6-phosphate receptor OS=Homo sapiens OX=9606 GN=IGF2R PE=1 SV=3	1	24	24	24	11.8	274.37	60262000	74714000	69441000	95019000	45253000	49497000	56657000	23964000	51789000	27375000	68937800	41856400	1.64701	UP	0.0341829
P78344	EIF4G2	sp|P78344|IF4G2_HUMAN Eukaryotic translation initiation factor 4 gamma 2 OS=Homo sapiens OX=9606 GN=EIF4G2 PE=1 SV=1	1	18	18	18	20.2	102.36	92716000	115160000	96438000	131660000	94638000	71883000	89866000	60255000	52322000	48051000	106122400	64475400	1.64594	UP	0.00450851
Q9Y4L1;Q9BXT5	HYOU1	sp|Q9Y4L1|HYOU1_HUMAN Hypoxia up-regulated protein 1 OS=Homo sapiens OX=9606 GN=HYOU1 PE=1 SV=1	2	27	27	27	33.7	111.33	404910000	400140000	359450000	473920000	350340000	267530000	334990000	172260000	303530000	134770000	397752000	242616000	1.63943	UP	0.00793468
P07814	EPRS1	sp|P07814|SYEP_HUMAN Bifunctional glutamate/proline--tRNA ligase OS=Homo sapiens OX=9606 GN=EPRS1 PE=1 SV=5	1	44	44	44	38.8	170.59	433310000	383930000	319560000	519040000	294960000	283380000	331840000	166650000	258010000	150380000	390160000	238052000	1.63897	UP	0.0211678
P53621	COPA	sp|P53621|COPA_HUMAN Coatomer subunit alpha OS=Homo sapiens OX=9606 GN=COPA PE=1 SV=2	1	52	52	52	45.4	138.34	883450000	877110000	716860000	1052800000	787100000	511430000	773160000	422680000	601440000	326190000	863464000	526980000	1.63851	UP	0.00769045
Q14258	TRIM25	sp|Q14258|TRI25_HUMAN E3 ubiquitin/ISG15 ligase TRIM25 OS=Homo sapiens OX=9606 GN=TRIM25 PE=1 SV=2	1	20	20	20	37.8	70.973	583130000	648550000	327430000	588630000	440580000	326970000	475990000	259570000	308230000	209220000	517664000	315996000	1.6382	UP	0.0257505
O15143	ARPC1B	sp|O15143|ARC1B_HUMAN Actin-related protein 2/3 complex subunit 1B OS=Homo sapiens OX=9606 GN=ARPC1B PE=1 SV=3	1	16	16	15	45.4	40.949	2319200000	2436800000	2074500000	2278000000	1815500000	1102300000	2188200000	1442000000	936750000	1033800000	2184800000	1340610000	1.62971	UP	0.0103078
Q00325	SLC25A3	sp|Q00325|MPCP_HUMAN Phosphate carrier protein, mitochondrial OS=Homo sapiens OX=9606 GN=SLC25A3 PE=1 SV=2	1	11	11	11	30.7	40.094	863970000	772880000	970880000	700510000	561290000	584240000	590110000	264070000	488910000	449500000	773906000	475366000	1.62802	UP	0.011577
Q92878	RAD50	sp|Q92878|RAD50_HUMAN DNA repair protein RAD50 OS=Homo sapiens OX=9606 GN=RAD50 PE=1 SV=1	1	32	32	32	24.9	153.89	109980000	97805000	137410000	152250000	77561000	71107000	79595000	49161000	87626000	65740000	115001200	70645800	1.62786	UP	0.0179242
P14854	COX6B1	sp|P14854|CX6B1_HUMAN Cytochrome c oxidase subunit 6B1 OS=Homo sapiens OX=9606 GN=COX6B1 PE=1 SV=2	1	5	5	5	53.5	10.192	541350000	801600000	466980000	703980000	502310000	336520000	657470000	230400000	335490000	293010000	603244000	370578000	1.62785	UP	0.0451127
P15170	GSPT1	sp|P15170|ERF3A_HUMAN Eukaryotic peptide chain release factor GTP-binding subunit ERF3A OS=Homo sapiens OX=9606 GN=GSPT1 PE=1 SV=1	1	17	17	10	39.3	55.755	147880000	118650000	139350000	211820000	97601000	107630000	129310000	65319000	74037000	64486000	143060200	88156400	1.6228	UP	0.0456203
P55060	CSE1L	sp|P55060|XPO2_HUMAN Exportin-2 OS=Homo sapiens OX=9606 GN=CSE1L PE=1 SV=3	1	22	22	22	26.4	110.42	381990000	391120000	372610000	391450000	247670000	280070000	265850000	223200000	198480000	135580000	356968000	220636000	1.6179	UP	0.00685443
Q9Y3B3	TMED7	sp|Q9Y3B3|TMED7_HUMAN Transmembrane emp24 domain-containing protein 7 OS=Homo sapiens OX=9606 GN=TMED7 PE=1 SV=2	1	9	9	9	47.3	25.171	305270000	388800000	337860000	367550000	271830000	205550000	239950000	107870000	308070000	173230000	334262000	206934000	1.61531	UP	0.0120799
Q9UNX3	RPL26L1	sp|Q9UNX3|RL26L_HUMAN 60S ribosomal protein L26-like 1 OS=Homo sapiens OX=9606 GN=RPL26L1 PE=1 SV=1	1	7	7	2	35.2	17.256	1015900000	1236300000	748510000	1328100000	671360000	645820000	801890000	594250000	680290000	376050000	1000034000	619660000	1.61384	UP	0.0322899
Q9Y383	LUC7L2	sp|Q9Y383|LC7L2_HUMAN Putative RNA-binding protein Luc7-like 2 OS=Homo sapiens OX=9606 GN=LUC7L2 PE=1 SV=2	1	12	12	7	31.6	46.513	221460000	280660000	208890000	220960000	159880000	197680000	155830000	113240000	102390000	108210000	218370000	135470000	1.61194	UP	0.0140003
P63151;Q66LE6;Q00005;Q9Y2T4	PPP2R2A	sp|P63151|2ABA_HUMAN Serine/threonine-protein phosphatase 2A 55 kDa regulatory subunit B alpha isoform OS=Homo sapiens OX=9606 GN=PPP2R2A PE=1 SV=1	4	13	13	13	35.3	51.691	124230000	113040000	72027000	102670000	92556000	69993000	50846000	61899000	67465000	62819000	100904600	62604400	1.61178	UP	0.00383916
P62701;P22090;Q8TD47	RPS4X	sp|P62701|RS4X_HUMAN 40S ribosomal protein S4, X isoform OS=Homo sapiens OX=9606 GN=RPS4X PE=1 SV=2	3	17	17	17	58.2	29.597	3108000000	3361100000	1984100000	3096400000	1723400000	1694800000	2570600000	1318100000	1604400000	1051500000	2654600000	1647880000	1.61092	UP	0.0435789
P84090	ERH	sp|P84090|ERH_HUMAN Enhancer of rudimentary homolog OS=Homo sapiens OX=9606 GN=ERH PE=1 SV=1	1	3	3	3	37.5	12.259	882780000	806800000	641010000	861340000	507740000	490060000	571230000	386880000	477530000	371280000	739934000	459396000	1.61067	UP	0.00834269
Q12769	NUP160	sp|Q12769|NU160_HUMAN Nuclear pore complex protein Nup160 OS=Homo sapiens OX=9606 GN=NUP160 PE=1 SV=3	1	12	12	12	9.7	162.12	58286000	76909000	89347000	75343000	56373000	42922000	62825000	35383000	36143000		71251600	44318250	1.60773	UP	0.0200436
P38919	EIF4A3	sp|P38919|IF4A3_HUMAN Eukaryotic initiation factor 4A-III OS=Homo sapiens OX=9606 GN=EIF4A3 PE=1 SV=4	1	23	23	19	53	46.871	1184600000	1370600000	1215100000	1547900000	821010000	857710000	935300000	635290000	784950000	610960000	1227842000	764842000	1.60535	UP	0.00923581
Q13347	EIF3I	sp|Q13347|EIF3I_HUMAN Eukaryotic translation initiation factor 3 subunit I OS=Homo sapiens OX=9606 GN=EIF3I PE=1 SV=1	1	14	14	14	57.8	36.501	255360000	299390000	260210000	317170000	318100000	185810000	254850000	129920000	187410000	147440000	290046000	181086000	1.6017	UP	0.0026843
Q9H6X2	ANTXR1	sp|Q9H6X2|ANTR1_HUMAN Anthrax toxin receptor 1 OS=Homo sapiens OX=9606 GN=ANTXR1 PE=1 SV=2	1	5	5	5	9.8	62.788	70734000	31067000	65970000	53370000	40341000	28891000	29791000	28367000	34893000	41321000	52296400	32652600	1.6016	UP	0.0373935
Q9Y678	COPG1	sp|Q9Y678|COPG1_HUMAN Coatomer subunit gamma-1 OS=Homo sapiens OX=9606 GN=COPG1 PE=1 SV=1	1	24	24	23	35.9	97.717	260170000	211810000	280420000	298110000	306760000	201750000	199070000	142360000	185500000	119570000	271454000	169650000	1.60008	UP	0.00255624
P54577	YARS1	sp|P54577|SYYC_HUMAN Tyrosine--tRNA ligase, cytoplasmic OS=Homo sapiens OX=9606 GN=YARS1 PE=1 SV=4	1	19	19	19	41.1	59.143	256620000	276880000	336300000	241440000	148990000	155450000	219890000	199300000	105490000	107480000	252046000	157522000	1.60007	UP	0.0387877
Q92688	ANP32B	sp|Q92688|AN32B_HUMAN Acidic leucine-rich nuclear phosphoprotein 32 family member B OS=Homo sapiens OX=9606 GN=ANP32B PE=1 SV=1	1	9	9	8	27.1	28.787	339100000	314630000	379170000	257970000	278310000	301080000	181530000	191900000	169470000	137780000	313836000	196352000	1.59833	UP	0.0101348
Q8NFH4	NUP37	sp|Q8NFH4|NUP37_HUMAN Nucleoporin Nup37 OS=Homo sapiens OX=9606 GN=NUP37 PE=1 SV=1	1	6	6	6	24.5	36.707	47862000	50708000	65351000	57065000	32635000	28269000	27996000		35179000	35519000	50724200	31740750	1.59808	UP	0.0212384
Q86UX7	FERMT3	sp|Q86UX7|URP2_HUMAN Fermitin family homolog 3 OS=Homo sapiens OX=9606 GN=FERMT3 PE=1 SV=1	1	17	17	17	29.4	75.952	266960000	334320000	250030000	224430000	219920000	135610000	265500000	156430000	122400000	131850000	259132000	162358000	1.59605	UP	0.0202579
Q13547	HDAC1	sp|Q13547|HDAC1_HUMAN Histone deacetylase 1 OS=Homo sapiens OX=9606 GN=HDAC1 PE=1 SV=1	1	11	11	6	27	55.102	344970000	314490000	259650000	280540000	202870000	157900000	224740000	187960000	175360000	132860000	280504000	175764000	1.59591	UP	0.00650601
Q7Z3U7	MON2	sp|Q7Z3U7|MON2_HUMAN Protein MON2 homolog OS=Homo sapiens OX=9606 GN=MON2 PE=1 SV=3	1	14	14	14	8.6	190.36	60225000	73434000	45797000	47419000	43168000	41521000	37766000	27798000	31693000	30525000	54008600	33860600	1.59503	UP	0.0117837
P52907	CAPZA1	sp|P52907|CAZA1_HUMAN F-actin-capping protein subunit alpha-1 OS=Homo sapiens OX=9606 GN=CAPZA1 PE=1 SV=3	1	11	9	9	57.7	32.922	1520500000	1456500000	1286000000	1409800000	1138000000	825870000	1356900000	699380000	692350000	696010000	1362160000	854102000	1.59484	UP	0.00805759
P48444	ARCN1	sp|P48444|COPD_HUMAN Coatomer subunit delta OS=Homo sapiens OX=9606 GN=ARCN1 PE=1 SV=1	1	24	24	24	43.6	57.21	310300000	231410000	230620000	348430000	271130000	191380000	245490000	130760000	193680000	111500000	278378000	174562000	1.59472	UP	0.0140723
O75533	SF3B1	sp|O75533|SF3B1_HUMAN Splicing factor 3B subunit 1 OS=Homo sapiens OX=9606 GN=SF3B1 PE=1 SV=3	1	34	34	34	34.4	145.83	282860000	291670000	251770000	313240000	189050000	199090000	214220000	92563000	204260000	124080000	265718000	166842600	1.59263	UP	0.0163655
Q8WWY3	PRPF31	sp|Q8WWY3|PRP31_HUMAN U4/U6 small nuclear ribonucleoprotein Prp31 OS=Homo sapiens OX=9606 GN=PRPF31 PE=1 SV=2	1	7	7	7	16.2	55.455	71069000	76941000	74318000	52986000	40670000	47525000	46775000		37093000	27355000	63196800	39687000	1.59238	UP	0.0346315
Q9BXP5	SRRT	sp|Q9BXP5|SRRT_HUMAN Serrate RNA effector molecule homolog OS=Homo sapiens OX=9606 GN=SRRT PE=1 SV=1	1	25	25	25	30.7	100.67	87056000	106650000	124220000	112810000	79155000	76415000	87498000	45813000	80257000	30383000	101978200	64073200	1.59159	UP	0.0251861
O43493	TGOLN2	sp|O43493|TGON2_HUMAN Trans-Golgi network integral membrane protein 2 OS=Homo sapiens OX=9606 GN=TGOLN2 PE=1 SV=4	1	3	3	3	8.5	45.879	86293000	65636000	62767000	77226000	50972000	47186000	40667000		41716000		68578800	4.31897e+07	1.58785	UP	0.0217224
Q9BW27	NUP85	sp|Q9BW27|NUP85_HUMAN Nuclear pore complex protein Nup85 OS=Homo sapiens OX=9606 GN=NUP85 PE=1 SV=1	1	11	11	11	18.3	75.019	106320000	91766000	92066000	107070000	70287000	70131000	62891000	34571000	76819000	50579000	93501800	58998200	1.58482	UP	0.00887483
Q8IXT5	RBM12B	sp|Q8IXT5|RB12B_HUMAN RNA-binding protein 12B OS=Homo sapiens OX=9606 GN=RBM12B PE=1 SV=2	1	6	6	6	5.5	118.1	39875000	29079000	32953000	39158000	29864000	26111000	22133000		25143000	12951000	34185800	21584500	1.58381	UP	0.0111565
P62424	RPL7A	sp|P62424|RL7A_HUMAN 60S ribosomal protein L7a OS=Homo sapiens OX=9606 GN=RPL7A PE=1 SV=2	1	16	16	16	44.7	29.995	1146300000	1280400000	783920000	1176900000	672170000	651950000	969880000	485860000	596990000	499050000	1011938000	640746000	1.57931	UP	0.0366651
Q13123	IK	sp|Q13123|RED_HUMAN Protein Red OS=Homo sapiens OX=9606 GN=IK PE=1 SV=3	1	9	9	9	18.1	65.601	65323000	71880000	96708000	81415000		40132000	41308000		54914000	63452000	78831500	49951500	1.57816	UP	0.0169993
P52948	NUP98	sp|P52948|NUP98_HUMAN Nuclear pore complex protein Nup98-Nup96 OS=Homo sapiens OX=9606 GN=NUP98 PE=1 SV=4	1	19	19	19	12.1	197.58	69078000	85477000	92820000	70139000	64722000	48105000	58093000	28057000	72374000	35606000	76447200	48447000	1.57796	UP	0.0190215
Q9Y6C9	MTCH2	sp|Q9Y6C9|MTCH2_HUMAN Mitochondrial carrier homolog 2 OS=Homo sapiens OX=9606 GN=MTCH2 PE=1 SV=1	1	8	8	8	35	33.331	271260000	189970000	159140000	220210000	171950000	123340000	149000000	71681000	161670000	136720000	202506000	128482200	1.57614	UP	0.019298
Q9Y376	CAB39	sp|Q9Y376|CAB39_HUMAN Calcium-binding protein 39 OS=Homo sapiens OX=9606 GN=CAB39 PE=1 SV=1	1	11	11	10	33.7	39.869	274960000	319310000	225940000	313600000	288560000	173810000	226450000	188770000	174920000	138960000	284474000	180582000	1.57532	UP	0.00144933
P62495	ETF1	sp|P62495|ERF1_HUMAN Eukaryotic peptide chain release factor subunit 1 OS=Homo sapiens OX=9606 GN=ETF1 PE=1 SV=3	1	16	16	16	36.8	49.03	197570000	153900000	147030000	183480000	122110000	95799000	142520000	92906000	110230000	69440000	160818000	102179000	1.57389	UP	0.0116158
Q9UL25	RAB21	sp|Q9UL25|RAB21_HUMAN Ras-related protein Rab-21 OS=Homo sapiens OX=9606 GN=RAB21 PE=1 SV=3	1	5	5	5	26.2	24.347	338570000	193670000	254650000	249140000	180740000	126470000	161030000	168120000	180280000	139230000	243354000	155026000	1.56976	UP	0.0174991
P17987	TCP1	sp|P17987|TCPA_HUMAN T-complex protein 1 subunit alpha OS=Homo sapiens OX=9606 GN=TCP1 PE=1 SV=1	1	25	25	25	54.7	60.343	701440000	847620000	866400000	836860000	544520000	528440000	576360000	381240000	515300000	419630000	759368000	484194000	1.56831	UP	0.0047203
O00267	SUPT5H	sp|O00267|SPT5H_HUMAN Transcription elongation factor SPT5 OS=Homo sapiens OX=9606 GN=SUPT5H PE=1 SV=1	1	21	21	21	23.6	121	101420000	99835000	90288000	92686000	75932000	67111000	77738000	32117000	72360000	44412000	92032200	58747600	1.56657	UP	0.00967661
Q14156	EFR3A	sp|Q14156|EFR3A_HUMAN Protein EFR3 homolog A OS=Homo sapiens OX=9606 GN=EFR3A PE=1 SV=2	1	12	12	12	17.3	92.923	38084000	28463000	30814000	36200000	38036000	24123000	17769000	23944000	15458000	28263000	34319400	21911400	1.56628	UP	0.00360484
Q9UH65	SWAP70	sp|Q9UH65|SWP70_HUMAN Switch-associated protein 70 OS=Homo sapiens OX=9606 GN=SWAP70 PE=1 SV=1	1	16	16	16	29.9	68.997	98796000	140710000	153390000	121780000	103110000	76012000	100970000	86827000	87989000	42829000	123557200	78925400	1.56549	UP	0.0147896
P61978	HNRNPK	sp|P61978|HNRPK_HUMAN Heterogeneous nuclear ribonucleoprotein K OS=Homo sapiens OX=9606 GN=HNRNPK PE=1 SV=1	1	17	17	17	43.8	50.976	1547000000	1641500000	1710400000	1801300000	1215700000	1138900000	1377100000	785350000	1015900000	752620000	1583180000	1013974000	1.56136	UP	0.00598252
Q02750	MAP2K1	sp|Q02750|MP2K1_HUMAN Dual specificity mitogen-activated protein kinase kinase 1 OS=Homo sapiens OX=9606 GN=MAP2K1 PE=1 SV=2	1	12	6	6	33.3	43.439	215300000	103020000	129060000	222860000	141140000	119430000	121870000	94695000	82232000	102150000	162276000	104075400	1.55922	UP	0.0494682
Q9Y673	ALG5	sp|Q9Y673|ALG5_HUMAN Dolichyl-phosphate beta-glucosyltransferase OS=Homo sapiens OX=9606 GN=ALG5 PE=1 SV=1	1	6	6	6	27.8	36.946		43402000	54381000	57185000	70527000	31154000	37723000	26546000	49446000		56373750	36217250	1.55654	UP	0.0356587
Q9Y6D5	ARFGEF2	sp|Q9Y6D5|BIG2_HUMAN Brefeldin A-inhibited guanine nucleotide-exchange protein 2 OS=Homo sapiens OX=9606 GN=ARFGEF2 PE=1 SV=3	1	17	7	7	10.3	202.04	51201000	58420000	31392000	47284000	38215000	28401000	31138000		28092000		45302400	2.92103e+07	1.5509	UP	0.0455216
Q8IWB7	WDFY1	sp|Q8IWB7|WDFY1_HUMAN WD repeat and FYVE domain-containing protein 1 OS=Homo sapiens OX=9606 GN=WDFY1 PE=1 SV=1	1	11	11	11	33.4	46.323	186550000	128960000	96291000	192630000	124190000	95973000	97612000	87698000	101940000	86670000	145724200	93978600	1.55061	UP	0.0261754
P53618	COPB1	sp|P53618|COPB_HUMAN Coatomer subunit beta OS=Homo sapiens OX=9606 GN=COPB1 PE=1 SV=3	1	31	31	31	41.8	107.14	337310000	224210000	301270000	315710000	237570000	189720000	229780000	185660000	193660000	115500000	283214000	182864000	1.54877	UP	0.00851638
O00754	MAN2B1	sp|O00754|MA2B1_HUMAN Lysosomal alpha-mannosidase OS=Homo sapiens OX=9606 GN=MAN2B1 PE=1 SV=3	1	15	15	15	20.2	113.74	153570000	141020000	181120000	157890000	211260000	117950000	180480000	96161000	94554000	56429000	168972000	109114800	1.54857	UP	0.0365574
Q9NR50	EIF2B3	sp|Q9NR50|EI2BG_HUMAN Translation initiation factor eIF-2B subunit gamma OS=Homo sapiens OX=9606 GN=EIF2B3 PE=1 SV=1	1	6	6	6	17.5	50.24	83196000	76121000	103430000	105880000	65520000	55984000	85736000	53905000	46388000	38441000	86829400	56090800	1.54802	UP	0.0252925
Q13435	SF3B2	sp|Q13435|SF3B2_HUMAN Splicing factor 3B subunit 2 OS=Homo sapiens OX=9606 GN=SF3B2 PE=1 SV=2	1	21	21	21	26.9	100.23	229070000	220400000	171330000	206030000	162180000	154710000	176520000	75422000	144150000	89980000	197802000	128156400	1.54344	UP	0.018116
Q92882	OSTF1	sp|Q92882|OSTF1_HUMAN Osteoclast-stimulating factor 1 OS=Homo sapiens OX=9606 GN=OSTF1 PE=1 SV=2	1	7	7	7	39.7	23.787	104410000	118100000	77222000	103490000	77354000		79737000	57115000	50155000		96115200	6.23357e+07	1.5419	UP	0.036778
O60763;REV__Q5VZ89	USO1	sp|O60763|USO1_HUMAN General vesicular transport factor p115 OS=Homo sapiens OX=9606 GN=USO1 PE=1 SV=2	2	19	19	19	25.2	107.89	327780000	414800000	315500000	444340000	422260000	274440000	298630000	292650000	247670000	135180000	384936000	249714000	1.54151	UP	0.00953741
P48739	PITPNB	sp|P48739|PIPNB_HUMAN Phosphatidylinositol transfer protein beta isoform OS=Homo sapiens OX=9606 GN=PITPNB PE=1 SV=2	1	12	12	10	48.7	31.54	236820000	282370000	293290000	292970000	228550000	211140000	257470000	129420000	135740000	131860000	266800000	173126000	1.54107	UP	0.0133691
O95373	IPO7	sp|O95373|IPO7_HUMAN Importin-7 OS=Homo sapiens OX=9606 GN=IPO7 PE=1 SV=1	1	15	15	15	16.2	119.52	350720000	258450000	309960000	460590000	272250000	220640000	246400000	229910000	231220000	144660000	330394000	214566000	1.53982	UP	0.0211293
O43617	TRAPPC3	sp|O43617|TPPC3_HUMAN Trafficking protein particle complex subunit 3 OS=Homo sapiens OX=9606 GN=TRAPPC3 PE=1 SV=1	1	8	8	8	38.3	20.274	261630000	294300000	205580000	300950000	192050000	163080000	251310000	143840000	147620000	110750000	250902000	163320000	1.53626	UP	0.0273666
Q9BS26	ERP44	sp|Q9BS26|ERP44_HUMAN Endoplasmic reticulum resident protein 44 OS=Homo sapiens OX=9606 GN=ERP44 PE=1 SV=1	1	13	13	13	39.4	46.971	423310000	376240000	309840000	516190000	398680000	280080000	381050000	169700000	313770000	173850000	404852000	263690000	1.53533	UP	0.0285432
Q15029	EFTUD2	sp|Q15029|U5S1_HUMAN 116 kDa U5 small nuclear ribonucleoprotein component OS=Homo sapiens OX=9606 GN=EFTUD2 PE=1 SV=1	1	36	35	35	46.6	109.43	303150000	370040000	329750000	406840000	204990000	241070000	273800000	182080000	225770000	129990000	322954000	210542000	1.53392	UP	0.0293954
O15260	SURF4	sp|O15260|SURF4_HUMAN Surfeit locus protein 4 OS=Homo sapiens OX=9606 GN=SURF4 PE=1 SV=3	1	5	5	5	20.8	30.394	228180000	187800000	169030000	272620000	213660000	112180000	196580000	85658000	132570000	172050000	214258000	139807600	1.53252	UP	0.0239685
O75844	ZMPSTE24	sp|O75844|FACE1_HUMAN CAAX prenyl protease 1 homolog OS=Homo sapiens OX=9606 GN=ZMPSTE24 PE=1 SV=2	1	10	10	10	27.8	54.812	222480000	220680000	241830000	163350000	136560000	131700000	208920000	84420000	122420000	95451000	196980000	128582200	1.53194	UP	0.0497937
P49755	TMED10	sp|P49755|TMEDA_HUMAN Transmembrane emp24 domain-containing protein 10 OS=Homo sapiens OX=9606 GN=TMED10 PE=1 SV=2	1	7	7	7	34.2	24.976	985890000	1047900000	834130000	949400000	898290000	633620000	1013600000	345300000	646530000	452580000	943122000	618326000	1.52528	UP	0.0264127
Q8NBS9	TXNDC5	sp|Q8NBS9|TXND5_HUMAN Thioredoxin domain-containing protein 5 OS=Homo sapiens OX=9606 GN=TXNDC5 PE=1 SV=2	1	16	16	16	38	47.628	1319300000	852410000	1094200000	1475600000	1734600000	916270000	1078400000	851940000	826780000	573190000	1295222000	849316000	1.52502	UP	0.0325033
O75694	NUP155	sp|O75694|NU155_HUMAN Nuclear pore complex protein Nup155 OS=Homo sapiens OX=9606 GN=NUP155 PE=1 SV=1	1	20	20	20	19.4	155.2	198790000	197720000	195920000	220820000	160270000	128370000	183580000	49267000	133720000	143780000	194704000	127743400	1.52418	UP	0.023314
O14773	TPP1	sp|O14773|TPP1_HUMAN Tripeptidyl-peptidase 1 OS=Homo sapiens OX=9606 GN=TPP1 PE=1 SV=2	1	5	5	5	13.7	61.247	903760000	921670000	701480000	414730000	850360000	351990000	535030000	600100000	403240000	608970000	758400000	499866000	1.51721	UP	0.043142
Q92621	NUP205	sp|Q92621|NU205_HUMAN Nuclear pore complex protein Nup205 OS=Homo sapiens OX=9606 GN=NUP205 PE=1 SV=3	1	19	19	19	9.7	227.92	94954000	146090000	107050000	103120000	84920000	80129000	100390000	45292000	77605000	50304000	107226800	70744000	1.5157	UP	0.036873
O43772	SLC25A20	sp|O43772|MCAT_HUMAN Mitochondrial carnitine/acylcarnitine carrier protein OS=Homo sapiens OX=9606 GN=SLC25A20 PE=1 SV=1	1	9	9	9	26.9	32.943	109510000	65097000	78146000	49117000	81036000	40210000	48166000	55419000	56714000	52265000	76581200	50554800	1.51482	UP	0.0370223
P11142	HSPA8	sp|P11142|HSP7C_HUMAN Heat shock cognate 71 kDa protein OS=Homo sapiens OX=9606 GN=HSPA8 PE=1 SV=1	1	35	35	26	52.9	70.897	8178000000	8855000000	6728700000	8960800000	6442500000	5959300000	7208700000	3833700000	4910100000	3956900000	7833000000	5173740000	1.51399	UP	0.0123515
Q13263	TRIM28	sp|Q13263|TIF1B_HUMAN Transcription intermediary factor 1-beta OS=Homo sapiens OX=9606 GN=TRIM28 PE=1 SV=5	1	23	23	23	32	88.549	447250000	360640000	452590000	322680000	251310000	309480000	298240000	171980000	237350000	196470000	366894000	242704000	1.51169	UP	0.029175
Q96D71;Q8NFH8	REPS1	sp|Q96D71|REPS1_HUMAN RalBP1-associated Eps domain-containing protein 1 OS=Homo sapiens OX=9606 GN=REPS1 PE=1 SV=3	2	6	6	6	10.3	86.661	39592000	34237000			39130000	24386000	29127000		21257000		37653000	2.49233e+07	1.51075	UP	0.0112128
O75390	CS	sp|O75390|CISY_HUMAN Citrate synthase, mitochondrial OS=Homo sapiens OX=9606 GN=CS PE=1 SV=2	1	16	16	16	35.8	51.712	1743100000	2160800000	2035100000	1918100000	1167100000	1154800000	1944300000	774270000	1082300000	1027300000	1804840000	1196594000	1.50831	UP	0.0495165
Q8WYA6	CTNNBL1	sp|Q8WYA6|CTBL1_HUMAN Beta-catenin-like protein 1 OS=Homo sapiens OX=9606 GN=CTNNBL1 PE=1 SV=1	1	11	11	11	22	65.173	110540000	139200000	127740000	151160000	89427000	95453000	102300000	57488000	94757000	60908000	123613400	82181200	1.50416	UP	0.0207368
P25789	PSMA4	sp|P25789|PSA4_HUMAN Proteasome subunit alpha type-4 OS=Homo sapiens OX=9606 GN=PSMA4 PE=1 SV=1	1	10	10	10	31.8	29.483	771290000	797100000	667180000	1009200000	656700000	502050000	703980000	325390000	741400000	321920000	780294000	518948000	1.50361	UP	0.0445328
P00338;P07864;Q6ZMR3	LDHA	sp|P00338|LDHA_HUMAN L-lactate dehydrogenase A chain OS=Homo sapiens OX=9606 GN=LDHA PE=1 SV=2	3	23	23	22	65.1	36.688	5768900000	4711300000	4279500000	7541600000	4740900000	4286300000	4600100000	3182500000	3448300000	2485400000	5408440000	3600520000	1.50213	UP	0.0324594
Q9NVG8	TBC1D13	sp|Q9NVG8|TBC13_HUMAN TBC1 domain family member 13 OS=Homo sapiens OX=9606 GN=TBC1D13 PE=1 SV=3	1	6	6	6	18.5	46.553	40441000	39513000	41198000	34488000	58560000	63359000	68862000	69509000	81399000	38243000	42840000	64274400	0.666517	DOWN	0.0314907
P48163	ME1	sp|P48163|MAOX_HUMAN NADP-dependent malic enzyme OS=Homo sapiens OX=9606 GN=ME1 PE=1 SV=1	1	6	6	6	10.8	64.149	24809000	23223000	18518000	26543000	30334000	31459000	52947000	36391000	39258000	26905000	24685400	37392000	0.660179	DOWN	0.0302201
Q8WZA0	LZIC	sp|Q8WZA0|LZIC_HUMAN Protein LZIC OS=Homo sapiens OX=9606 GN=LZIC PE=1 SV=1	1	6	6	6	28.9	21.494	122000000	164010000	156960000	92227000	129130000	217300000	222220000	174820000	260600000	134460000	132865400	201880000	0.65814	DOWN	0.0255459
Q9H2D6	TRIOBP	sp|Q9H2D6|TARA_HUMAN TRIO and F-actin-binding protein OS=Homo sapiens OX=9606 GN=TRIOBP PE=1 SV=3	1	15	15	14	6.5	261.37	67671000	98807000	91293000	78851000	143060000	143810000	126620000	142560000	133160000	182800000	95936400	145790000	0.658045	DOWN	0.0152012
Q99497	PARK7	sp|Q99497|PARK7_HUMAN Parkinson disease protein 7 OS=Homo sapiens OX=9606 GN=PARK7 PE=1 SV=2	1	10	10	10	59.8	19.891	2066900000	2413000000	2036300000	2089700000	2661500000	4106500000	3515300000	3188900000	4011100000	2384400000	2253480000	3441240000	0.654845	DOWN	0.00764232
P13489	RNH1	sp|P13489|RINI_HUMAN Ribonuclease inhibitor OS=Homo sapiens OX=9606 GN=RNH1 PE=1 SV=2	1	21	21	21	67.5	49.973	704710000	598090000	826870000	710700000	1170700000	1405500000	921920000	1497200000	1415100000	922500000	802214000	1232444000	0.650913	DOWN	0.0286507
P51178	PLCD1	sp|P51178|PLCD1_HUMAN 1-phosphatidylinositol 4,5-bisphosphate phosphodiesterase delta-1 OS=Homo sapiens OX=9606 GN=PLCD1 PE=1 SV=2	1	10	10	9	19.3	85.664	36568000	50611000	41157000		41917000	63278000	81485000	47835000	81725000	53743000	42563250	65613200	0.648699	DOWN	0.0276891
Q16563	SYPL1	sp|Q16563|SYPL1_HUMAN Synaptophysin-like protein 1 OS=Homo sapiens OX=9606 GN=SYPL1 PE=1 SV=1	1	4	4	4	20.1	28.565	496270000	371080000	314880000	279970000	632980000	636800000	540950000	500900000	660290000	933360000	419036000	654460000	0.640277	DOWN	0.0458715
P22061	PCMT1	sp|P22061|PIMT_HUMAN Protein-L-isoaspartate(D-aspartate) O-methyltransferase OS=Homo sapiens OX=9606 GN=PCMT1 PE=1 SV=4	1	10	10	10	47.1	24.636	215970000	224270000	233840000	136010000	260400000	298440000	282850000	350580000	419520000	320560000	214098000	334390000	0.640264	DOWN	0.00548416
Q12929	EPS8	sp|Q12929|EPS8_HUMAN Epidermal growth factor receptor kinase substrate 8 OS=Homo sapiens OX=9606 GN=EPS8 PE=1 SV=1	1	5	5	5	8.5	91.88	55647000	54500000	69657000	79579000	73099000	82325000	87635000	130370000	99942000	119540000	66496400	103962400	0.63962	DOWN	0.00707616
Q07954	LRP1	sp|Q07954|LRP1_HUMAN Prolow-density lipoprotein receptor-related protein 1 OS=Homo sapiens OX=9606 GN=LRP1 PE=1 SV=2	1	65	65	65	16.7	504.6	491440000	322860000	436130000	184570000	752150000	770050000	523900000	701810000	729610000	704420000	437430000	685958000	0.637692	DOWN	0.0433268
Q9UKS6	PACSIN3	sp|Q9UKS6|PACN3_HUMAN Protein kinase C and casein kinase substrate in neurons protein 3 OS=Homo sapiens OX=9606 GN=PACSIN3 PE=1 SV=2	1	10	10	10	34.9	48.486	27743000	71818000	32012000	53958000	53611000	75484000	71926000		59328000	93814000	47828400	75138000	0.636541	DOWN	0.0431456
Q92930	RAB8B	sp|Q92930|RAB8B_HUMAN Ras-related protein Rab-8B OS=Homo sapiens OX=9606 GN=RAB8B PE=1 SV=2	1	7	3	3	35.7	23.584	132130000	196530000	208000000	172100000	391370000	320760000	298620000	309320000	465730000	348220000	220026000	348530000	0.631297	DOWN	0.0449833
P21399	ACO1	sp|P21399|ACOHC_HUMAN Cytoplasmic aconitate hydratase OS=Homo sapiens OX=9606 GN=ACO1 PE=1 SV=3	1	22	22	22	33.6	98.398	262070000	237400000	214300000	159160000	352610000	422500000	308620000	464890000	378980000	368660000	245108000	388730000	0.630535	DOWN	0.00833888
P63010	AP2B1	sp|P63010|AP2B1_HUMAN AP-2 complex subunit beta OS=Homo sapiens OX=9606 GN=AP2B1 PE=1 SV=1	1	26	12	12	32.4	104.55	146480000	104490000	221080000	184390000	252830000	289330000	245190000	370310000	284550000	259630000	181854000	289802000	0.627511	DOWN	0.013245
Q14195;Q14117	DPYSL3	sp|Q14195|DPYL3_HUMAN Dihydropyrimidinase-related protein 3 OS=Homo sapiens OX=9606 GN=DPYSL3 PE=1 SV=1	2	20	20	16	52.5	61.963	783830000	396340000	744220000	217960000	789770000	768360000	855220000	1103900000	886670000	1066900000	586424000	936210000	0.626381	DOWN	0.031181
O75116	ROCK2	sp|O75116|ROCK2_HUMAN Rho-associated protein kinase 2 OS=Homo sapiens OX=9606 GN=ROCK2 PE=1 SV=4	1	28	28	22	23	160.9	90189000	81783000	102090000	103740000	109600000	180260000	109680000	174780000	162860000	154540000	97480400	156424000	0.623181	DOWN	0.00238683
P08670	VIM	sp|P08670|VIME_HUMAN Vimentin OS=Homo sapiens OX=9606 GN=VIM PE=1 SV=4	1	54	53	45	89.1	53.651	11221000000	16256000000	16627000000	15001000000	23206000000	25116000000	22575000000	26654000000	34553000000	23313000000	16462200000	26442200000	0.622573	DOWN	0.00871185
P02545;REV__Q5VX52	LMNA	sp|P02545|LMNA_HUMAN Prelamin-A/C OS=Homo sapiens OX=9606 GN=LMNA PE=1 SV=1	2	54	54	53	71.2	74.139	7355800000	7112600000	7713200000	5734000000	14253000000	16818000000	9178600000	10064000000	16962000000	15459000000	8433720000	13696320000	0.615765	DOWN	0.0478795
Q8NC56	LEMD2	sp|Q8NC56|LEMD2_HUMAN LEM domain-containing protein 2 OS=Homo sapiens OX=9606 GN=LEMD2 PE=1 SV=1	1	14	14	14	31.6	56.974	80785000	71545000	74263000	57037000	117220000	144950000	89855000	121730000	150520000	144510000	80170000	130313000	0.615211	DOWN	0.0104827
Q01082	SPTBN1	sp|Q01082|SPTB2_HUMAN Spectrin beta chain, non-erythrocytic 1 OS=Homo sapiens OX=9606 GN=SPTBN1 PE=1 SV=2	1	107	107	99	54.1	274.61	504020000	825550000	752500000	400830000	1234600000	1213700000	882280000	1379200000	1609000000	988240000	743500000	1214484000	0.612194	DOWN	0.0428471
P35241	RDX	sp|P35241|RADI_HUMAN Radixin OS=Homo sapiens OX=9606 GN=RDX PE=1 SV=1	1	19	5	5	29.3	68.563	66854000	89065000		143860000	104210000	192710000	167960000			141820000	100997250	1.67497e+08	0.602981	DOWN	0.0330814
Q9H8H3	METTL7A	sp|Q9H8H3|MET7A_HUMAN Putative methyltransferase-like protein 7A OS=Homo sapiens OX=9606 GN=METTL7A PE=1 SV=1	1	7	7	7	34.4	28.319	229240000	144430000	169400000	71896000	346980000	390590000	312430000	239270000	327650000	326410000	192389200	319270000	0.602591	DOWN	0.0408178
O94901	SUN1	sp|O94901|SUN1_HUMAN SUN domain-containing protein 1 OS=Homo sapiens OX=9606 GN=SUN1 PE=1 SV=4	1	17	17	17	27.8	87.109	95228000	74034000	88187000	68546000	161490000	178180000	114890000	114470000	210990000	193840000	97497000	162474000	0.600078	DOWN	0.0381079
P08758	ANXA5	sp|P08758|ANXA5_HUMAN Annexin A5 OS=Homo sapiens OX=9606 GN=ANXA5 PE=1 SV=2	1	24	24	24	75.9	35.936	5946800000	4285900000	6454500000	3602000000	9039000000	10574000000	6190700000	8666300000	11837000000	11976000000	5865640000	9848800000	0.595569	DOWN	0.0248923
Q13232	NME3	sp|Q13232|NDK3_HUMAN Nucleoside diphosphate kinase 3 OS=Homo sapiens OX=9606 GN=NME3 PE=1 SV=2	1	8	8	8	43.8	19.015	81890000	72534000	159930000	87936000	195060000	268010000	134800000	190940000	213910000	198130000	119470000	201158000	0.593911	DOWN	0.0361217
P24752	ACAT1	sp|P24752|THIL_HUMAN Acetyl-CoA acetyltransferase, mitochondrial OS=Homo sapiens OX=9606 GN=ACAT1 PE=1 SV=1	1	13	13	13	29.5	45.199	257710000	311250000	222950000	311020000	522700000	642200000	415310000	438410000	643050000	598980000	325126000	547590000	0.59374	DOWN	0.0151831
Q9HC38	GLOD4	sp|Q9HC38|GLOD4_HUMAN Glyoxalase domain-containing protein 4 OS=Homo sapiens OX=9606 GN=GLOD4 PE=1 SV=1	1	11	11	11	40.9	34.793	338230000	267260000	392630000	280920000	372160000	669910000	542460000	510730000	726880000	348670000	330240000	559730000	0.589999	DOWN	0.0116198
Q8TDQ7	GNPDA2	sp|Q8TDQ7|GNPI2_HUMAN Glucosamine-6-phosphate isomerase 2 OS=Homo sapiens OX=9606 GN=GNPDA2 PE=1 SV=1	1	9	4	4	43.5	31.084	82960000	56856000	78614000	60506000	74887000	136010000		127500000	118640000	98759000	70764600	120227250	0.58859	DOWN	0.00097809
Q96RF0	SNX18	sp|Q96RF0|SNX18_HUMAN Sorting nexin-18 OS=Homo sapiens OX=9606 GN=SNX18 PE=1 SV=2	1	5	5	5	8.6	68.894	98550000	61384000	89740000	54297000	109600000	128820000	132890000	120970000	111010000	211050000	82714200	140948000	0.586842	DOWN	0.0235242
Q9Y490	TLN1	sp|Q9Y490|TLN1_HUMAN Talin-1 OS=Homo sapiens OX=9606 GN=TLN1 PE=1 SV=3	1	115	115	100	50.9	269.76	780010000	685000000	1350100000	698150000	1109800000	1517500000	1199400000	1909200000	1159400000	2145500000	924612000	1586200000	0.58291	DOWN	0.0223957
Q16555	DPYSL2	sp|Q16555|DPYL2_HUMAN Dihydropyrimidinase-related protein 2 OS=Homo sapiens OX=9606 GN=DPYSL2 PE=1 SV=1	1	19	16	15	45.6	62.293	564000000	636590000	855680000	373320000	1339300000	1398100000	1179900000	1192400000	1328300000	1455700000	753778000	1310880000	0.575017	DOWN	0.0126934
P48960;Q9UHX3	ADGRE5	sp|P48960|AGRE5_HUMAN Adhesion G protein-coupled receptor E5 OS=Homo sapiens OX=9606 GN=ADGRE5 PE=1 SV=4	2	13	13	13	21.9	91.868	41337000	47306000	70461000	36956000	99165000	126960000	60605000	132470000	86945000	108300000	59045000	103056000	0.572941	DOWN	0.0370196
P00568;Q9Y6K8	AK1	sp|P00568|KAD1_HUMAN Adenylate kinase isoenzyme 1 OS=Homo sapiens OX=9606 GN=AK1 PE=1 SV=3	2	11	11	11	59.3	21.635	247980000	270820000	475270000	377030000	561410000	669490000	456440000	661550000	920610000	666450000	386502000	674908000	0.572674	DOWN	0.0159608
Q13613	MTMR1	sp|Q13613|MTMR1_HUMAN Myotubularin-related protein 1 OS=Homo sapiens OX=9606 GN=MTMR1 PE=1 SV=4	1	7	7	7	11.7	74.677	122070000	247360000	160660000	123090000	204220000	304240000	165340000		328300000	401400000	171480000	299820000	0.571943	DOWN	0.0409352
O00468	AGRN	sp|O00468|AGRIN_HUMAN Agrin OS=Homo sapiens OX=9606 GN=AGRN PE=1 SV=6	1	25	25	25	15.6	217.32	77896000	157560000	143280000	131750000	185960000	261230000	107050000	254290000	236540000	360980000	139289200	244018000	0.570815	DOWN	0.0456709
P10768	ESD	sp|P10768|ESTD_HUMAN S-formylglutathione hydrolase OS=Homo sapiens OX=9606 GN=ESD PE=1 SV=2	1	7	7	7	47.5	31.462	639550000	402990000	565790000	245670000	416660000	1125500000	467280000	1046000000	709130000	635860000	454132000	796754000	0.569978	DOWN	0.0429854
O14786	NRP1	sp|O14786|NRP1_HUMAN Neuropilin-1 OS=Homo sapiens OX=9606 GN=NRP1 PE=1 SV=3	1	9	9	9	14.6	103.13	27200000	34815000	31356000	35841000	62913000	82703000	47747000	60089000	71062000	80476000	38425000	68415400	0.561643	DOWN	0.0108042
P12235	SLC25A4	sp|P12235|ADT1_HUMAN ADP/ATP translocase 1 OS=Homo sapiens OX=9606 GN=SLC25A4 PE=1 SV=4	1	16	6	5	50.3	33.064	89717000	108780000	132480000	93381000	115420000	211660000	105240000	203650000	213930000	227050000	107955600	192306000	0.561374	DOWN	0.00695155
P00736;Q9NZP8	C1R	sp|P00736|C1R_HUMAN Complement C1r subcomponent OS=Homo sapiens OX=9606 GN=C1R PE=1 SV=2	2	16	16	16	32.2	80.118	104590000	74478000	147320000	101590000	224060000	190490000	232070000	274430000	157610000	316100000	130407600	234140000	0.556964	DOWN	0.0275895
Q9H4M9	EHD1	sp|Q9H4M9|EHD1_HUMAN EH domain-containing protein 1 OS=Homo sapiens OX=9606 GN=EHD1 PE=1 SV=2	1	25	24	15	52.2	60.626	236760000	199590000	279650000	225190000	405690000	482070000	285890000	533470000	475300000	646380000	269376000	484622000	0.555848	DOWN	0.014061
Q9P0V9	SEPTIN10	sp|Q9P0V9|SEP10_HUMAN Septin-10 OS=Homo sapiens OX=9606 GN=SEPTIN10 PE=1 SV=2	1	10	9	9	36.3	52.592	87002000	70865000	116290000	101100000	230110000	268450000	152090000	189260000	231020000	256220000	121073400	219408000	0.551819	DOWN	0.0245515
Q86TX2;P49753;Q3I5F7	ACOT1; ACOT2	sp|Q86TX2|ACOT1_HUMAN Acyl-coenzyme A thioesterase 1 OS=Homo sapiens OX=9606 GN=ACOT1 PE=1 SV=1;sp|P49753|ACOT2_HUMAN Acyl-coenzyme A thioesterase 2, mitochondrial OS=Homo sapiens OX=9606 GN=ACOT2 PE=1 SV=6	3	10	10	10	30.2	46.277	67054000	63228000	66506000	65058000	99560000	152600000	94473000	132240000	106490000	171220000	72281200	131404600	0.550066	DOWN	0.00558588
P11216	PYGB	sp|P11216|PYGB_HUMAN Glycogen phosphorylase, brain form OS=Homo sapiens OX=9606 GN=PYGB PE=1 SV=5	1	35	35	27	46.5	96.695	400770000	381910000	626800000	321410000	745290000	813310000	855400000	700870000	1130800000	1013300000	495236000	902736000	0.548594	DOWN	0.00634109
O75323	NIPSNAP2	sp|O75323|NIPS2_HUMAN Protein NipSnap homolog 2 OS=Homo sapiens OX=9606 GN=NIPSNAP2 PE=1 SV=1	1	6	6	6	23.8	33.742	108940000	142070000	186270000	90742000	150460000	246490000	236760000	208360000	284710000	263420000	135696400	247948000	0.547278	DOWN	0.000694349
P49189	ALDH9A1	sp|P49189|AL9A1_HUMAN 4-trimethylaminobutyraldehyde dehydrogenase OS=Homo sapiens OX=9606 GN=ALDH9A1 PE=1 SV=3	1	16	16	16	42.9	53.801	326430000	303370000	259470000	181530000	437810000	515150000	428510000	561380000	898690000	369380000	301722000	554622000	0.544014	DOWN	0.0372598
P63092;Q5JWF2;P38405	GNAS; GNAS	sp|P63092|GNAS2_HUMAN Guanine nucleotide-binding protein G(s) subunit alpha isoforms short OS=Homo sapiens OX=9606 GN=GNAS PE=1 SV=1;sp|Q5JWF2|GNAS1_HUMAN Guanine nucleotide-binding protein G(s) subunit alpha isoforms XLas OS=Homo sapiens OX=9606 GN=GNAS P	3	13	12	12	39.8	45.664	295030000	262980000	236120000	140130000	511740000	568300000	310250000	500100000	695480000	589260000	289200000	532678000	0.542917	DOWN	0.025065
P35611	ADD1	sp|P35611|ADDA_HUMAN Alpha-adducin OS=Homo sapiens OX=9606 GN=ADD1 PE=1 SV=2	1	14	14	14	26.6	80.954	61676000	80889000	118670000	59177000	206120000	144640000	166800000	237520000	262310000	162430000	105306400	194740000	0.540754	DOWN	0.0372385
Q9UBI6	GNG12	sp|Q9UBI6|GBG12_HUMAN Guanine nucleotide-binding protein G(I)/G(S)/G(O) subunit gamma-12 OS=Homo sapiens OX=9606 GN=GNG12 PE=1 SV=3	1	4	4	4	69.4	8.0061	280980000	379350000	444700000	299840000	576580000	815930000	450330000	531130000	767360000	1102900000	396290000	733530000	0.540251	DOWN	0.0291382
P28072	PSMB6	sp|P28072|PSB6_HUMAN Proteasome subunit beta type-6 OS=Homo sapiens OX=9606 GN=PSMB6 PE=1 SV=4	1	4	4	4	16.7	25.357	59592000	105160000	138680000	35379000	70595000	149100000	223190000	174820000	114310000	97747000	81881200	151833400	0.539283	DOWN	0.0409286
O43488;Q8NHP1	AKR7A2	sp|O43488|ARK72_HUMAN Aflatoxin B1 aldehyde reductase member 2 OS=Homo sapiens OX=9606 GN=AKR7A2 PE=1 SV=3	2	11	11	10	39.6	39.589	137920000	200000000	153610000	98554000	232570000	248840000	246240000	321030000	499070000	216610000	164530800	306358000	0.537054	DOWN	0.0358619
Q7Z4H8	POGLUT3	sp|Q7Z4H8|PLGT3_HUMAN Protein O-glucosyltransferase 3 OS=Homo sapiens OX=9606 GN=POGLUT3 PE=1 SV=2	1	14	14	14	29.6	58.572	116920000	112730000	130250000	208190000	226060000	393640000	225230000	226480000	439010000	194520000	158830000	295776000	0.536994	DOWN	0.0390738
P48681	NES	sp|P48681|NEST_HUMAN Nestin OS=Homo sapiens OX=9606 GN=NES PE=1 SV=2	1	24	24	24	17.9	177.44	41750000	73347000	115700000	93131000	94373000	184100000	121090000	204050000	169070000	103710000	83660200	156404000	0.534898	DOWN	0.0125535
P27361	MAPK3	sp|P27361|MK03_HUMAN Mitogen-activated protein kinase 3 OS=Homo sapiens OX=9606 GN=MAPK3 PE=1 SV=4	1	11	8	8	27.7	43.135	65329000	69066000	66162000	63407000	87023000	137140000	124260000	87538000	225520000	82114000	70197400	131314400	0.534575	DOWN	0.0475588
O75368	SH3BGRL	sp|O75368|SH3L1_HUMAN Adapter SH3BGRL OS=Homo sapiens OX=9606 GN=SH3BGRL PE=1 SV=1	1	11	11	11	84.2	12.774	477870000	293800000	490930000	249880000	573040000	734250000	633760000	680090000	831590000	1026600000	417104000	781258000	0.533888	DOWN	0.00448632
P37235;P84074;P61601	HPCAL1; HPCA	sp|P37235|HPCL1_HUMAN Hippocalcin-like protein 1 OS=Homo sapiens OX=9606 GN=HPCAL1 PE=1 SV=3;sp|P84074|HPCA_HUMAN Neuron-specific calcium-binding protein hippocalcin OS=Homo sapiens OX=9606 GN=HPCA PE=1 SV=2;sp|P61601|NCALD_HUMAN Neurocalcin-delta OS=Homo	3	6	6	6	33.2	22.313	112710000	103150000	102530000	72224000	89385000	187030000	123780000	278650000	153670000	158500000	95999800	180326000	0.532368	DOWN	0.0153227
O43813	LANCL1	sp|O43813|LANC1_HUMAN Glutathione S-transferase LANCL1 OS=Homo sapiens OX=9606 GN=LANCL1 PE=1 SV=1	1	8	8	8	25.3	45.283	167680000	115490000	141860000	67944000	203840000	237920000	198180000	267850000	240250000	365550000	139362800	261950000	0.532021	DOWN	0.00983586
Q9Y657	SPIN1	sp|Q9Y657|SPIN1_HUMAN Spindlin-1 OS=Homo sapiens OX=9606 GN=SPIN1 PE=1 SV=3	1	3	3	3	13.7	29.6	19948000		33505000	24771000		52017000			59918000	35566000	2.60747e+07	49167000	0.530329	DOWN	0.047965
P04114;CON__ENSEMBL:ENSBTAP00000032840	APOB	sp|P04114|APOB_HUMAN Apolipoprotein B-100 OS=Homo sapiens OX=9606 GN=APOB PE=1 SV=2	2	111	111	111	29.7	515.6	268810000	119630000	320680000	297320000	602710000	522440000	473880000	589090000	476100000	978490000	321830000	608000000	0.529326	DOWN	0.0486919
Q9NPH2	ISYNA1	sp|Q9NPH2|INO1_HUMAN Inositol-3-phosphate synthase 1 OS=Homo sapiens OX=9606 GN=ISYNA1 PE=1 SV=1	1	10	10	10	26.7	61.067	71604000	53517000	82156000	36186000	82211000	163600000	97655000	100080000	161250000	97627000	65134800	124042400	0.525101	DOWN	0.0114554
P0DP04;P01782	IGHV3-43D; IGHV3-9	sp|P0DP04|HV43D_HUMAN Immunoglobulin heavy variable 3-43D OS=Homo sapiens OX=9606 GN=IGHV3-43D PE=3 SV=1;sp|P01782|HV309_HUMAN Immunoglobulin heavy variable 3-9 OS=Homo sapiens OX=9606 GN=IGHV3-9 PE=1 SV=2	2	3	2	2	34.7	13.017	120750000	87235000	228560000	130560000	298050000	459330000	191000000	403270000	279940000	318060000	173031000	330320000	0.523828	DOWN	0.0329169
Q96CX2;Q6ZWB6	KCTD12	sp|Q96CX2|KCD12_HUMAN BTB/POZ domain-containing protein KCTD12 OS=Homo sapiens OX=9606 GN=KCTD12 PE=1 SV=1	2	12	12	12	38.8	35.7	182470000	199260000	235690000	131390000	320110000	529630000	397280000	394300000	366400000	368460000	213784000	411214000	0.519885	DOWN	0.0019418
Q12765	SCRN1	sp|Q12765|SCRN1_HUMAN Secernin-1 OS=Homo sapiens OX=9606 GN=SCRN1 PE=1 SV=2	1	8	8	8	22	46.382	106510000	77696000	88522000	25011000	118720000	241880000	102470000	170280000	144180000	143190000	83291800	160400000	0.519276	DOWN	0.0256613
Q9Y639	NPTN	sp|Q9Y639|NPTN_HUMAN Neuroplastin OS=Homo sapiens OX=9606 GN=NPTN PE=1 SV=2	1	5	5	5	14.6	44.387	730930000	428520000	741970000	444320000	649880000	1287800000	679670000	1042700000	1107400000	1658700000	599124000	1155254000	0.518608	DOWN	0.012689
P46108	CRK	sp|P46108|CRK_HUMAN Adapter molecule crk OS=Homo sapiens OX=9606 GN=CRK PE=1 SV=2	1	5	5	5	22	33.83	35159000		30049000	60206000	69405000	105950000	77767000	130710000	103520000	61999000	48704750	95989200	0.507398	DOWN	0.020789
P34949	MPI	sp|P34949|MPI_HUMAN Mannose-6-phosphate isomerase OS=Homo sapiens OX=9606 GN=MPI PE=1 SV=2	1	10	10	10	30	46.655	47783000	29835000	38114000	34037000	57645000	70198000	60322000	87437000	140120000	53107000	41482800	82236800	0.504431	DOWN	0.0374814
Q14914	PTGR1	sp|Q14914|PTGR1_HUMAN Prostaglandin reductase 1 OS=Homo sapiens OX=9606 GN=PTGR1 PE=1 SV=2	1	11	11	11	40.7	35.869	142590000	84848000	169620000	140660000	277650000	328750000	209520000	389060000	446740000	270610000	163073600	328936000	0.495761	DOWN	0.0135497
Q14185	DOCK1	sp|Q14185|DOCK1_HUMAN Dedicator of cytokinesis protein 1 OS=Homo sapiens OX=9606 GN=DOCK1 PE=1 SV=2	1	12	12	12	7.5	215.34	29520000	20317000	28644000	21604000	21065000	39188000	48243000	59588000	57319000	43701000	24230000	49607800	0.488431	DOWN	0.00040933
P09382	LGALS1	sp|P09382|LEG1_HUMAN Galectin-1 OS=Homo sapiens OX=9606 GN=LGALS1 PE=1 SV=2	1	9	9	9	63.7	14.716	5666000000	5642600000	10789000000	7067100000	11869000000	18028000000	8399000000	17643000000	18394000000	23932000000	8206740000	17279200000	0.474949	DOWN	0.0123685
P08133	ANXA6	sp|P08133|ANXA6_HUMAN Annexin A6 OS=Homo sapiens OX=9606 GN=ANXA6 PE=1 SV=3	1	42	42	42	60.6	75.872	1310100000	1789200000	2660000000	1408000000	2928700000	3568400000	3083900000	4871700000	3160700000	6573900000	2019200000	4251720000	0.474914	DOWN	0.0166829
P50135	HNMT	sp|P50135|HNMT_HUMAN Histamine N-methyltransferase OS=Homo sapiens OX=9606 GN=HNMT PE=1 SV=1	1	4	4	4	21.2	33.295	50616000	50118000	49441000	42952000	106050000	104910000	145640000		128900000	126360000	59835400	126452500	0.473185	DOWN	0.00311165
P19823;CON__Q9TRI1	ITIH2	sp|P19823|ITIH2_HUMAN Inter-alpha-trypsin inhibitor heavy chain H2 OS=Homo sapiens OX=9606 GN=ITIH2 PE=1 SV=2	2	23	23	23	23.3	106.46	410540000	263190000	825120000	247430000	915440000	1049700000	510360000	1335800000	1412600000	1325600000	532344000	1126812000	0.472434	DOWN	0.0260433
Q8NF91	SYNE1	sp|Q8NF91|SYNE1_HUMAN Nesprin-1 OS=Homo sapiens OX=9606 GN=SYNE1 PE=1 SV=4	1	27	26	26	4.1	1011.1	232780000	209800000	252350000	196280000	390290000	974800000	343280000	454120000	594450000	349940000	256300000	543318000	0.471731	DOWN	0.046711
P08603	CFH	sp|P08603|CFAH_HUMAN Complement factor H OS=Homo sapiens OX=9606 GN=CFH PE=1 SV=4	1	50	50	45	51.2	139.09	244240000	159730000	346310000	161050000	652300000	512080000	429110000	646230000	853400000	881740000	312726000	664512000	0.47061	DOWN	0.0254031
Q9H3H3	C11orf68	sp|Q9H3H3|CK068_HUMAN UPF0696 protein C11orf68 OS=Homo sapiens OX=9606 GN=C11orf68 PE=1 SV=3	1	4	4	4	14.7	31.43	85978000	67968000	82630000	61197000	162260000	224940000	123930000		216010000	217310000	92006600	195547500	0.470508	DOWN	0.00974963
P29992;P19086	GNA11	sp|P29992|GNA11_HUMAN Guanine nucleotide-binding protein subunit alpha-11 OS=Homo sapiens OX=9606 GN=GNA11 PE=1 SV=2	2	11	10	6	34	42.123	134010000	106850000	128540000	166870000	259390000	338510000	210900000	253200000	461480000	430150000	159132000	338848000	0.469626	DOWN	0.0118585
Q3SY00	TSGA10IP	sp|Q3SY00|T10IP_HUMAN Testis-specific protein 10-interacting protein OS=Homo sapiens OX=9606 GN=TSGA10IP PE=1 SV=2	1	1	1	1	1.8	62.381		68132000	118160000		213260000	282330000	176520000	385810000	260620000	312730000	133184000	283602000	0.469616	DOWN	0.0342006
Q9ULC3	RAB23	sp|Q9ULC3|RAB23_HUMAN Ras-related protein Rab-23 OS=Homo sapiens OX=9606 GN=RAB23 PE=1 SV=1	1	9	9	9	43.5	26.659	62719000	54236000	111270000	54241000	117930000	130700000	94243000	217200000	193350000	219160000	80079200	170930600	0.46849	DOWN	0.0133558
Q08257	CRYZ	sp|Q08257|QOR_HUMAN Quinone oxidoreductase OS=Homo sapiens OX=9606 GN=CRYZ PE=1 SV=1	1	11	11	11	51.1	35.206	280010000	183270000	386420000	131480000	420700000	539590000	413860000	667460000	846320000	525180000	280376000	598482000	0.468479	DOWN	0.0089051
Q8IW45	NAXD	sp|Q8IW45|NNRD_HUMAN ATP-dependent (S)-NAD(P)H-hydrate dehydratase OS=Homo sapiens OX=9606 GN=NAXD PE=1 SV=1	1	12	12	12	47.6	36.576	4776400000	2882800000	3651800000	1504600000	4115400000	9288200000	3914300000	6965900000	9037900000	7050600000	3386200000	7251380000	0.466973	DOWN	0.00854033
Q9UHG3	PCYOX1	sp|Q9UHG3|PCYOX_HUMAN Prenylcysteine oxidase 1 OS=Homo sapiens OX=9606 GN=PCYOX1 PE=1 SV=3	1	15	15	15	38.4	56.639	218960000	205230000	205040000	207270000	538270000	756050000	314530000	447970000	574840000	854450000	274954000	589568000	0.466365	DOWN	0.0289774
P01031;CON__Q1A7A4	C5	sp|P01031|CO5_HUMAN Complement C5 OS=Homo sapiens OX=9606 GN=C5 PE=1 SV=4	2	27	27	27	20.2	188.3	58283000	49445000	182120000	52627000	209870000	194470000	96926000	274570000	338330000	285320000	110469000	237923200	0.464305	DOWN	0.0487507
P09619	PDGFRB	sp|P09619|PGFRB_HUMAN Platelet-derived growth factor receptor beta OS=Homo sapiens OX=9606 GN=PDGFRB PE=1 SV=1	1	12	12	12	15.2	123.97	174590000	126180000	263400000	152430000	284150000	539790000	216620000	353210000	657270000	399580000	200150000	433294000	0.461927	DOWN	0.0220521
O95967	EFEMP2	sp|O95967|FBLN4_HUMAN EGF-containing fibulin-like extracellular matrix protein 2 OS=Homo sapiens OX=9606 GN=EFEMP2 PE=1 SV=3	1	9	9	9	23.5	49.405	111760000	39391000	62089000	18480000	162950000	244270000	109520000	172990000	129690000	199470000	78934000	171188000	0.461095	DOWN	0.0319419
P07357	C8A	sp|P07357|CO8A_HUMAN Complement component C8 alpha chain OS=Homo sapiens OX=9606 GN=C8A PE=1 SV=2	1	11	11	11	22.4	65.163	90628000	64449000	181500000		329730000	390300000	153590000	364180000	456770000	449960000	166576750	362960000	0.45894	DOWN	0.0473384
P05556	ITGB1	sp|P05556|ITB1_HUMAN Integrin beta-1 OS=Homo sapiens OX=9606 GN=ITGB1 PE=1 SV=2	1	22	22	22	27.1	88.414	580500000	415120000	1149000000	741550000	1078900000	2024400000	812910000	1750100000	1227000000	2963400000	793014000	1755562000	0.451715	DOWN	0.0402132
Q9BX97	PLVAP	sp|Q9BX97|PLVAP_HUMAN Plasmalemma vesicle-associated protein OS=Homo sapiens OX=9606 GN=PLVAP PE=1 SV=1	1	5	5	5	14.9	50.594	90161000	133470000	120150000	101170000	215770000	362050000	379970000	279120000	265400000	180540000	132144200	293416000	0.450365	DOWN	0.00514672
P68032;P68133	ACTC1; ACTA1	sp|P68032|ACTC_HUMAN Actin, alpha cardiac muscle 1 OS=Homo sapiens OX=9606 GN=ACTC1 PE=1 SV=1;sp|P68133|ACTS_HUMAN Actin, alpha skeletal muscle OS=Homo sapiens OX=9606 GN=ACTA1 PE=1 SV=1	2	28	28	1	78.8	42.019	18074000000	14978000000	40849000000	24061000000	33951000000	42787000000	35670000000	80393000000	35872000000	99413000000	26382600000	58827000000	0.448478	DOWN	0.0487476
Q6UVK1	CSPG4	sp|Q6UVK1|CSPG4_HUMAN Chondroitin sulfate proteoglycan 4 OS=Homo sapiens OX=9606 GN=CSPG4 PE=1 SV=2	1	14	14	14	8.7	250.53	13842000		23363000	20008000	22498000	37728000	27976000	76916000	31741000	48635000	19927750	44599200	0.446819	DOWN	0.0454971
P35080	PFN2	sp|P35080|PROF2_HUMAN Profilin-2 OS=Homo sapiens OX=9606 GN=PFN2 PE=1 SV=3	1	3	3	3	27.9	15.046	165490000	82480000	105020000	34956000	158550000	275780000	233970000	256610000	222030000	248770000	109299200	247432000	0.441734	DOWN	0.00072467
P39059	COL15A1	sp|P39059|COFA1_HUMAN Collagen alpha-1(XV) chain OS=Homo sapiens OX=9606 GN=COL15A1 PE=1 SV=2	1	13	13	13	11.5	141.72	45707000	328930000	240650000	243890000	596670000	447980000	485470000	746620000	887590000	754370000	291169400	664406000	0.43824	DOWN	0.0162908
Q6PCB0	VWA1	sp|Q6PCB0|VWA1_HUMAN von Willebrand factor A domain-containing protein 1 OS=Homo sapiens OX=9606 GN=VWA1 PE=1 SV=1	1	13	13	13	40.4	46.804	56558000	113540000	179580000	116330000	163750000	298480000	191010000	337280000	161100000	467980000	125951600	291170000	0.432571	DOWN	0.0232862
Q8N335	GPD1L	sp|Q8N335|GPD1L_HUMAN Glycerol-3-phosphate dehydrogenase 1-like protein OS=Homo sapiens OX=9606 GN=GPD1L PE=1 SV=1	1	8	8	8	21.9	38.418	70076000	85047000	96703000	31167000	105960000	184100000	166090000	222930000	154700000	175480000	77790600	180660000	0.430591	DOWN	0.000375527
Q9BW30	TPPP3	sp|Q9BW30|TPPP3_HUMAN Tubulin polymerization-promoting protein family member 3 OS=Homo sapiens OX=9606 GN=TPPP3 PE=1 SV=1	1	5	5	5	26.1	18.985	82334000	64948000	333490000	117120000	355560000	244430000	320260000	607240000	355670000	686970000	190690400	442914000	0.430536	DOWN	0.0462228
Q96FV2	SCRN2	sp|Q96FV2|SCRN2_HUMAN Secernin-2 OS=Homo sapiens OX=9606 GN=SCRN2 PE=1 SV=3	1	8	8	8	30.6	46.596	53043000	60989000	43434000	35661000	75726000	82703000	100210000		193950000		53770600	125621000	0.428038	DOWN	0.0368581
P35580;REV__Q8IYT3	MYH10	sp|P35580|MYH10_HUMAN Myosin-10 OS=Homo sapiens OX=9606 GN=MYH10 PE=1 SV=3	2	95	71	71	48.2	229	667970000	276010000	509580000	307420000	554580000	1100700000	663290000	1254700000	627540000	1768300000	463112000	1082906000	0.427657	DOWN	0.0239586
P11766	ADH5	sp|P11766|ADHX_HUMAN Alcohol dehydrogenase class-3 OS=Homo sapiens OX=9606 GN=ADH5 PE=1 SV=4	1	15	15	15	45.5	39.724	556840000	445470000	653880000	429200000	1369900000	1988100000	1240500000	1391900000	2025300000	1508100000	691058000	1630780000	0.423759	DOWN	0.00408092
P03952	KLKB1	sp|P03952|KLKB1_HUMAN Plasma kallikrein OS=Homo sapiens OX=9606 GN=KLKB1 PE=1 SV=1	1	9	9	8	14.7	71.369	41854000	23443000	82164000	55456000	166090000	134100000	102950000	229660000	224610000	186910000	73801400	175646000	0.420171	DOWN	0.0203712
Q15404	RSU1	sp|Q15404|RSU1_HUMAN Ras suppressor protein 1 OS=Homo sapiens OX=9606 GN=RSU1 PE=1 SV=3	1	12	12	12	36.1	31.54	234320000	174850000	483950000	206900000	399460000	718190000	359930000	828680000	517320000	1160900000	299896000	717004000	0.418263	DOWN	0.0238144
O43491	EPB41L2	sp|O43491|E41L2_HUMAN Band 4.1-like protein 2 OS=Homo sapiens OX=9606 GN=EPB41L2 PE=1 SV=1	1	22	22	20	27.5	112.59	128560000	119440000	195180000	54765000	323990000	414830000	247590000	431950000	437920000	436830000	164387000	393824000	0.417412	DOWN	0.00447201
Q14624;CON__Q3T052	ITIH4	sp|Q14624|ITIH4_HUMAN Inter-alpha-trypsin inhibitor heavy chain H4 OS=Homo sapiens OX=9606 GN=ITIH4 PE=1 SV=4	2	18	18	18	24.3	103.36	133670000	94078000	228380000	82393000	447270000	327210000	255010000	615590000	469440000	710200000	197158200	475490000	0.414642	DOWN	0.0337305
P10301	RRAS	sp|P10301|RRAS_HUMAN Ras-related protein R-Ras OS=Homo sapiens OX=9606 GN=RRAS PE=1 SV=1	1	11	11	9	55.5	23.48	213050000	187360000	397110000	154710000	547750000	587000000	369140000	657130000	754760000	1268700000	299996000	727346000	0.412453	DOWN	0.0338378
Q02252	ALDH6A1	sp|Q02252|MMSA_HUMAN Methylmalonate-semialdehyde dehydrogenase [acylating], mitochondrial OS=Homo sapiens OX=9606 GN=ALDH6A1 PE=1 SV=2	1	18	18	18	34.8	57.839	110050000	143390000	91858000	48812000	185840000	381880000	238790000	135090000	369020000	283050000	115990000	281566000	0.411946	DOWN	0.0116177
O00159	MYO1C	sp|O00159|MYO1C_HUMAN Unconventional myosin-Ic OS=Homo sapiens OX=9606 GN=MYO1C PE=1 SV=4	1	47	47	46	50	121.68	264070000	272500000	549640000	271010000	977470000	1005500000	541510000	1193200000	1112600000	1823100000	466938000	1135182000	0.411333	DOWN	0.0273563
Q8WWX9	SELENOM	sp|Q8WWX9|SELM_HUMAN Selenoprotein M OS=Homo sapiens OX=9606 GN=SELENOM PE=1 SV=3	1	4	4	4	35.9	16.231	98542000	55453000	117040000	97591000	245480000	390000000	130520000	256230000	473280000	246700000	122821200	299346000	0.410298	DOWN	0.0317945
P01023	A2M	sp|P01023|A2MG_HUMAN Alpha-2-macroglobulin OS=Homo sapiens OX=9606 GN=A2M PE=1 SV=3	1	57	57	50	51	163.29	443030000	391250000	1093500000	441340000	1340000000	1609600000	1082700000	2552100000	1646800000	2169600000	741824000	1812160000	0.409359	DOWN	0.0103034
Q14643	ITPR1	sp|Q14643|ITPR1_HUMAN Inositol 1,4,5-trisphosphate receptor type 1 OS=Homo sapiens OX=9606 GN=ITPR1 PE=1 SV=3	1	18	15	13	7	313.93	19096000			21486000	35031000	51885000	45431000	74543000	51811000	84694000	2.52043e+07	61672800	0.408678	DOWN	0.0146342
P18206	VCL	sp|P18206|VINC_HUMAN Vinculin OS=Homo sapiens OX=9606 GN=VCL PE=1 SV=4	1	69	69	69	60.4	123.8	1164400000	972070000	2638200000	1087000000	2391400000	3952400000	2240200000	5212600000	2571900000	6355000000	1650614000	4066420000	0.405913	DOWN	0.0224737
P00734	F2	sp|P00734|THRB_HUMAN Prothrombin OS=Homo sapiens OX=9606 GN=F2 PE=1 SV=2	1	29	29	23	54	70.036	170260000	122450000	337160000	80089000	533310000	535410000	216000000	730270000	807920000	777570000	248653800	613434000	0.405347	DOWN	0.0297076
P08237	PFKM	sp|P08237|PFKAM_HUMAN ATP-dependent 6-phosphofructokinase, muscle type OS=Homo sapiens OX=9606 GN=PFKM PE=1 SV=2	1	26	23	23	38.6	85.182	119540000	110910000	157550000	59978000	230090000	352600000	123230000	414960000	441200000	345100000	135613600	335418000	0.404312	DOWN	0.0129855
Q13418	ILK	sp|Q13418|ILK_HUMAN Integrin-linked protein kinase OS=Homo sapiens OX=9606 GN=ILK PE=1 SV=2	1	17	17	17	39.2	51.419	177250000	153650000	509990000	212050000	420330000	636860000	316390000	1080800000	510410000	1102300000	294654000	729352000	0.403994	DOWN	0.0354747
P01011	SERPINA3	sp|P01011|AACT_HUMAN Alpha-1-antichymotrypsin OS=Homo sapiens OX=9606 GN=SERPINA3 PE=1 SV=2	1	17	17	17	44.9	47.65	455850000	394530000	899550000	268610000	1926900000	1559100000	985410000	1941300000	2307400000	3076600000	789088000	1973962000	0.399748	DOWN	0.0342333
P21333	FLNA	sp|P21333|FLNA_HUMAN Filamin-A OS=Homo sapiens OX=9606 GN=FLNA PE=1 SV=4	1	143	143	129	68.1	280.74	4460300000	2262400000	8849300000	3556300000	5898800000	10839000000	7787900000	17060000000	7162500000	19824000000	5005420000	12534680000	0.399326	DOWN	0.0262943
P04196	HRG	sp|P04196|HRG_HUMAN Histidine-rich glycoprotein OS=Homo sapiens OX=9606 GN=HRG PE=1 SV=1	1	13	13	13	26.3	59.578	255430000	173250000	395040000	79632000	580970000	801290000	397650000	945670000	813410000	761250000	296864400	743854000	0.39909	DOWN	0.00791249
P23229	ITGA6	sp|P23229|ITA6_HUMAN Integrin alpha-6 OS=Homo sapiens OX=9606 GN=ITGA6 PE=1 SV=5	1	20	20	20	20.6	126.6	38340000	60271000	95330000	94397000	123410000	215160000	73294000	239220000	200950000	306590000	82349600	207042800	0.397742	DOWN	0.0157468
P46821	MAP1B	sp|P46821|MAP1B_HUMAN Microtubule-associated protein 1B OS=Homo sapiens OX=9606 GN=MAP1B PE=1 SV=2	1	25	25	23	12.9	270.63	41004000	51093000	123400000	63327000	139260000	186140000	193140000	299060000	108670000	271720000	83616800	211746000	0.394892	DOWN	0.0114511
P04275	VWF	sp|P04275|VWF_HUMAN von Willebrand factor OS=Homo sapiens OX=9606 GN=VWF PE=1 SV=4	1	42	42	42	18.2	309.26	57972000	84257000	91472000	49457000	196490000	199170000	194040000	401570000	124490000	298390000	95929600	243532000	0.39391	DOWN	0.0277127
Q7Z4I7	LIMS2	sp|Q7Z4I7|LIMS2_HUMAN LIM and senescent cell antigen-like-containing domain protein 2 OS=Homo sapiens OX=9606 GN=LIMS2 PE=1 SV=1	1	14	14	8	48.4	38.916	133310000	90047000	272050000	105290000	266310000	444280000	231350000	556920000	215520000	775260000	173401400	444666000	0.389959	DOWN	0.0419026
P98160	HSPG2	sp|P98160|PGBM_HUMAN Basement membrane-specific heparan sulfate proteoglycan core protein OS=Homo sapiens OX=9606 GN=HSPG2 PE=1 SV=4	1	129	129	129	42.4	468.83	353640000	570540000	855760000	434830000	1115600000	1730900000	967450000	2010800000	1139100000	2698600000	666074000	1709370000	0.389661	DOWN	0.0158785
Q13425	SNTB2	sp|Q13425|SNTB2_HUMAN Beta-2-syntrophin OS=Homo sapiens OX=9606 GN=SNTB2 PE=1 SV=1	1	16	16	16	35.4	57.949	116050000	106290000	199690000	93379000	374040000	488440000	227490000	431170000	457240000	689860000	177889800	458840000	0.387695	DOWN	0.014521
P23634;Q16720	ATP2B4	sp|P23634|AT2B4_HUMAN Plasma membrane calcium-transporting ATPase 4 OS=Homo sapiens OX=9606 GN=ATP2B4 PE=1 SV=2	2	32	32	20	28.8	137.92	150480000	133130000	204990000	90620000	141130000	416050000	204090000	427480000	314280000	513770000	144070000	375134000	0.384049	DOWN	0.0034085
P46939;Q13474	UTRN	sp|P46939|UTRN_HUMAN Utrophin OS=Homo sapiens OX=9606 GN=UTRN PE=1 SV=2	2	61	61	60	21	394.46	430280000	248170000	985100000	148090000	1766100000	2099300000	1042700000	1759000000	2716900000	1731600000	715548000	1869900000	0.382666	DOWN	0.021519
Q9NVD7	PARVA	sp|Q9NVD7|PARVA_HUMAN Alpha-parvin OS=Homo sapiens OX=9606 GN=PARVA PE=1 SV=1	1	12	12	10	35.8	42.243	314400000	180790000	638200000	238100000	661330000	993970000	452760000	1343300000	856860000	1700300000	406564000	1069438000	0.380166	DOWN	0.0227371
P21266	GSTM3	sp|P21266|GSTM3_HUMAN Glutathione S-transferase Mu 3 OS=Homo sapiens OX=9606 GN=GSTM3 PE=1 SV=3	1	16	15	14	60.9	26.559	363750000	335370000	588570000	324140000	653480000	1041600000	486860000	1801100000	1789500000	845670000	453062000	1192946000	0.379784	DOWN	0.0256876
P22413	ENPP1	sp|P22413|ENPP1_HUMAN Ectonucleotide pyrophosphatase/phosphodiesterase family member 1 OS=Homo sapiens OX=9606 GN=ENPP1 PE=1 SV=2	1	8	8	8	11.1	104.92	23166000	21075000	42372000	15237000	61062000	164500000	71260000	55551000	72128000	69290000	32582400	86545800	0.376476	DOWN	0.0360732
P00751	CFB	sp|P00751|CFAB_HUMAN Complement factor B OS=Homo sapiens OX=9606 GN=CFB PE=1 SV=2	1	26	26	26	42.5	85.532	188950000	130970000	304610000	167920000	727310000	624720000	367140000	942260000	1315600000	799810000	303952000	809906000	0.375293	DOWN	0.0305435
Q02952	AKAP12	sp|Q02952|AKA12_HUMAN A-kinase anchor protein 12 OS=Homo sapiens OX=9606 GN=AKAP12 PE=1 SV=4	1	15	15	15	12	191.48	18078000	21749000	55809000	48136000	56093000	135250000	68740000	130650000	80768000	118180000	39973000	106717600	0.374568	DOWN	0.00294882
P02748;CON__Q3MHN2;REV__Q4AC99	C9	sp|P02748|CO9_HUMAN Complement component C9 OS=Homo sapiens OX=9606 GN=C9 PE=1 SV=2	3	17	17	16	29.3	63.173	279070000	297240000	710610000	100650000	1633900000	1548700000	630620000	2024900000	1980900000	1891900000	604294000	1615404000	0.374082	DOWN	0.0285448
P02766	TTR	sp|P02766|TTHY_HUMAN Transthyretin OS=Homo sapiens OX=9606 GN=TTR PE=1 SV=1	1	9	9	9	68.7	15.887	505120000	402000000	1380200000	329720000	2358800000	2197200000	1195700000	3525600000	3799900000	2707200000	995168000	2685120000	0.370623	DOWN	0.0243274
P07360	C8G	sp|P07360|CO8G_HUMAN Complement component C8 gamma chain OS=Homo sapiens OX=9606 GN=C8G PE=1 SV=3	1	9	9	9	54.5	22.277	79272000	64122000	110840000	51295000	231440000	234290000	145840000	192670000	479500000	407030000	107393800	291866000	0.367956	DOWN	0.0338446
P21980;P49221	TGM2	sp|P21980|TGM2_HUMAN Protein-glutamine gamma-glutamyltransferase 2 OS=Homo sapiens OX=9606 GN=TGM2 PE=1 SV=2	2	32	32	32	62.3	77.328	1360100000	862610000	1334300000	1274600000	4908600000	6064400000	785780000	6303600000	6592600000	6808000000	1948042000	5310876000	0.366802	DOWN	0.0386318
P36955;CON__Q95121	SERPINF1	sp|P36955|PEDF_HUMAN Pigment epithelium-derived factor OS=Homo sapiens OX=9606 GN=SERPINF1 PE=1 SV=4	2	15	15	15	40	46.312	459050000	391640000	610120000	304060000	1564800000	1085500000	982590000	2055300000	2456200000	2595200000	665934000	1834958000	0.362915	DOWN	0.0214194
Q15847	ADIRF	sp|Q15847|ADIRF_HUMAN Adipogenesis regulatory factor OS=Homo sapiens OX=9606 GN=ADIRF PE=1 SV=1	1	2	2	2	28.9	7.8547	171040000	337790000	162640000	110700000	249000000	480730000	847220000	357590000	388550000	769460000	206234000	568710000	0.362635	DOWN	0.0100682
P00740	F9	sp|P00740|FA9_HUMAN Coagulation factor IX OS=Homo sapiens OX=9606 GN=F9 PE=1 SV=2	1	9	9	9	22.6	51.778	28674000	31780000	56962000		49736000	163620000	40183000	125060000	151050000	97923000	41788000	115567200	0.36159	DOWN	0.0236955
P12109	COL6A1	sp|P12109|CO6A1_HUMAN Collagen alpha-1(VI) chain OS=Homo sapiens OX=9606 GN=COL6A1 PE=1 SV=3	1	37	37	37	47.2	108.53	1285500000	5351200000	5676400000	2729000000	23160000000	15089000000	12057000000	24254000000	19729000000	34765000000	7640420000	21178800000	0.360758	DOWN	0.042477
Q9BZL4	PPP1R12C	sp|Q9BZL4|PP12C_HUMAN Protein phosphatase 1 regulatory subunit 12C OS=Homo sapiens OX=9606 GN=PPP1R12C PE=1 SV=1	1	8	8	8	12.4	84.88	30642000	29906000	21683000	23084000	56827000	99198000	31784000	128040000	58069000	133260000	32428400	90070200	0.360035	DOWN	0.0240501
P08697;CON__P28800	SERPINF2	sp|P08697|A2AP_HUMAN Alpha-2-antiplasmin OS=Homo sapiens OX=9606 GN=SERPINF2 PE=1 SV=3	2	16	16	16	38.3	54.565	113270000	222700000	350590000	54082000	481440000	509210000	222590000	821470000	1000800000	845800000	244416400	679974000	0.35945	DOWN	0.0259604
P0C0L4;CON__ENSEMBL:ENSBTAP00000007350	C4A	sp|P0C0L4|CO4A_HUMAN Complement C4-A OS=Homo sapiens OX=9606 GN=C4A PE=1 SV=2	2	61	3	3	42.1	192.78	149020000	39414000	85123000	60402000	149450000	386720000	98810000	236630000	381610000	242760000	96681800	269306000	0.359004	DOWN	0.0178279
P12111	COL6A3	sp|P12111|CO6A3_HUMAN Collagen alpha-3(VI) chain OS=Homo sapiens OX=9606 GN=COL6A3 PE=1 SV=5	1	147	147	147	52.3	343.67	1669100000	5680500000	6635500000	3271400000	24591000000	15939000000	13120000000	30397000000	20372000000	36801000000	8369500000	23325800000	0.358809	DOWN	0.0397286
Q14118	DAG1	sp|Q14118|DAG1_HUMAN Dystroglycan 1 OS=Homo sapiens OX=9606 GN=DAG1 PE=1 SV=2	1	7	7	7	8.2	97.44	37777000	29175000	70982000	29419000	123040000	160680000	57743000	116390000	175210000	301250000	58078600	162254600	0.357947	DOWN	0.0459598
P04156	PRNP	sp|P04156|PRIO_HUMAN Major prion protein OS=Homo sapiens OX=9606 GN=PRNP PE=1 SV=1	1	4	4	4	15.8	27.661	38083000	33467000	42317000	44635000	109580000	145510000	67870000	109840000	262770000	164120000	53616400	150022000	0.35739	DOWN	0.0265965
P0C0L5	C4B	sp|P0C0L5|CO4B_HUMAN Complement C4-B OS=Homo sapiens OX=9606 GN=C4B PE=1 SV=2	1	61	61	3	41.9	192.75	591790000	252760000	415830000	354760000	880170000	1834800000	681840000	948880000	2203100000	1320900000	499062000	1397904000	0.357007	DOWN	0.0172111
P02749;CON__P17690	APOH	sp|P02749|APOH_HUMAN Beta-2-glycoprotein 1 OS=Homo sapiens OX=9606 GN=APOH PE=1 SV=3	2	14	14	14	56.2	38.298	305910000	287670000	900090000	236840000	1290400000	1083700000	749210000	1728500000	2502300000	2441500000	604182000	1701042000	0.355183	DOWN	0.0281087
P04217;CON__Q2KJF1	A1BG	sp|P04217|A1BG_HUMAN Alpha-1B-glycoprotein OS=Homo sapiens OX=9606 GN=A1BG PE=1 SV=4	2	13	13	13	45.5	54.253	227260000	181070000	460560000	143700000	1466600000	1121800000	585110000	1499700000	1794400000	1986100000	495838000	1397422000	0.354823	DOWN	0.03388
Q9NYL2	MAP3K20	sp|Q9NYL2|M3K20_HUMAN Mitogen-activated protein kinase kinase kinase 20 OS=Homo sapiens OX=9606 GN=MAP3K20 PE=1 SV=3	1	8	8	8	13.1	91.154	16376000	18010000	34599000	24314000	62251000	120400000	50154000	65552000	100750000	102890000	31110000	87949200	0.353727	DOWN	0.00627405
Q13332	PTPRS	sp|Q13332|PTPRS_HUMAN Receptor-type tyrosine-protein phosphatase S OS=Homo sapiens OX=9606 GN=PTPRS PE=1 SV=3	1	5	5	4	4.7	217.04	10237000	12822000		24956000	34853000	61927000	34708000	35308000	92850000	68229000	20717000	58604400	0.353506	DOWN	0.0252601
Q15113	PCOLCE	sp|Q15113|PCOC1_HUMAN Procollagen C-endopeptidase enhancer 1 OS=Homo sapiens OX=9606 GN=PCOLCE PE=1 SV=2	1	16	16	16	45.7	47.972	167530000	164870000	188480000	102740000	518760000	355950000	470830000	1139400000	660830000	644900000	228476000	654382000	0.349148	DOWN	0.0237209
P01009;P20848	SERPINA1	sp|P01009|A1AT_HUMAN Alpha-1-antitrypsin OS=Homo sapiens OX=9606 GN=SERPINA1 PE=1 SV=3	2	28	28	28	51.9	46.736	3922200000	2608500000	7875300000	1477200000	14417000000	13713000000	7271100000	28357000000	19980000000	18761000000	6060040000	17616420000	0.344	DOWN	0.0253533
Q16363	LAMA4	sp|Q16363|LAMA4_HUMAN Laminin subunit alpha-4 OS=Homo sapiens OX=9606 GN=LAMA4 PE=1 SV=4	1	41	41	41	27.9	202.52	71763000	129280000	205300000	123380000	294740000	478370000	245670000	557460000	264830000	856480000	164892600	480562000	0.343125	DOWN	0.0282671
Q9BX66	SORBS1	sp|Q9BX66|SRBS1_HUMAN Sorbin and SH3 domain-containing protein 1 OS=Homo sapiens OX=9606 GN=SORBS1 PE=1 SV=3	1	22	22	21	17.8	142.51	121730000	56470000	491680000	43969000	198880000	322330000	350720000	818930000	329440000	841380000	182545800	532560000	0.34277	DOWN	0.0441567
P21589	NT5E	sp|P21589|5NTD_HUMAN 5-nucleotidase OS=Homo sapiens OX=9606 GN=NT5E PE=1 SV=1	1	15	15	15	34.5	63.367	52052000	40324000	131770000	40601000	342010000	346990000	107440000	431730000	498890000	388020000	121351400	354614000	0.342207	DOWN	0.0295495
P19652	ORM2	sp|P19652|A1AG2_HUMAN Alpha-1-acid glycoprotein 2 OS=Homo sapiens OX=9606 GN=ORM2 PE=1 SV=2	1	7	4	4	43.8	23.602	305230000	250400000	612160000	169640000	1393600000	1918900000	615290000	1453700000	1637700000	2443300000	546206000	1613778000	0.338464	DOWN	0.0216113
P01024;CON__Q2UVX4;O95568	C3	sp|P01024|CO3_HUMAN Complement C3 OS=Homo sapiens OX=9606 GN=C3 PE=1 SV=2	3	99	99	99	65.1	187.15	926650000	778570000	1775500000	735580000	4146400000	3181700000	2171800000	4892200000	8649900000	5924500000	1672540000	4964020000	0.336933	DOWN	0.0352546
P05155;CON__P50448	SERPING1	sp|P05155|IC1_HUMAN Plasma protease C1 inhibitor OS=Homo sapiens OX=9606 GN=SERPING1 PE=1 SV=2	2	11	11	11	22.4	55.154	530250000	258390000	725190000	313520000	1457900000	1819300000	802030000	1429700000	3540300000	2177900000	657050000	1953846000	0.336285	DOWN	0.033562
P29972	AQP1	sp|P29972|AQP1_HUMAN Aquaporin-1 OS=Homo sapiens OX=9606 GN=AQP1 PE=1 SV=3	1	2	2	2	10	28.526	52385000	54314000			125280000	167810000	223280000	343180000	151040000	273960000	7.73263e+07	231854000	0.333513	DOWN	0.0216714
P02763	ORM1	sp|P02763|A1AG1_HUMAN Alpha-1-acid glycoprotein 1 OS=Homo sapiens OX=9606 GN=ORM1 PE=1 SV=2	1	8	8	5	45.3	23.539	1710700000	1569200000	2151500000	753770000	5186600000	5124700000	2707500000	10139000000	6324100000	9860800000	2274354000	6831220000	0.332935	DOWN	0.0222086
P13671	C6	sp|P13671|CO6_HUMAN Complement component C6 OS=Homo sapiens OX=9606 GN=C6 PE=1 SV=3	1	16	16	16	19.6	104.79	22660000	23261000	38111000	11007000	135820000	131870000	50105000	135850000	195860000	183110000	46171800	139359000	0.331316	DOWN	0.0264426
P10643	C7	sp|P10643|CO7_HUMAN Complement component C7 OS=Homo sapiens OX=9606 GN=C7 PE=1 SV=2	1	22	22	20	39	93.517	116780000	62268000	160750000	24029000	505210000	429340000	164270000	732230000	461650000	841000000	173807400	525698000	0.330622	DOWN	0.043979
P02647;CON__P15497	APOA1	sp|P02647|APOA1_HUMAN Apolipoprotein A-I OS=Homo sapiens OX=9606 GN=APOA1 PE=1 SV=1	2	31	31	31	66.7	30.777	1923500000	847670000	3289400000	829060000	5058300000	8119900000	2718100000	9227700000	10231000000	5841500000	2389586000	7227640000	0.330618	DOWN	0.0148941
P01042;CON__P01045-1;CON__Q2KJ62;CON__P01044-1	KNG1	sp|P01042|KNG1_HUMAN Kininogen-1 OS=Homo sapiens OX=9606 GN=KNG1 PE=1 SV=2	4	16	16	16	24.8	71.957	347490000	203490000	521570000	222060000	1589800000	1598400000	923520000	1463800000	2623300000	2202100000	576882000	1762224000	0.32736	DOWN	0.0168095
P06727;CON__Q32PJ2	APOA4	sp|P06727|APOA4_HUMAN Apolipoprotein A-IV OS=Homo sapiens OX=9606 GN=APOA4 PE=1 SV=4	2	22	22	22	56.3	45.371	72864000	64616000	123600000	34070000	143430000	236580000	173600000	306060000	249880000	375680000	87716000	268360000	0.326859	DOWN	0.0018335
Q9NZN4	EHD2	sp|Q9NZN4|EHD2_HUMAN EH domain-containing protein 2 OS=Homo sapiens OX=9606 GN=EHD2 PE=1 SV=2	1	27	27	24	62.6	61.161	583050000	529230000	1525700000	270610000	4309900000	3847700000	1546500000	5141600000	4085100000	7485500000	1443698000	4421280000	0.326534	DOWN	0.04058
P39060	COL18A1	sp|P39060|COIA1_HUMAN Collagen alpha-1(XVIII) chain OS=Homo sapiens OX=9606 GN=COL18A1 PE=1 SV=5	1	19	19	19	12.9	178.19	121080000	251130000	588290000	256240000	1463400000	1710700000	553790000	1749300000	1259900000	2941200000	536028000	1642978000	0.326254	DOWN	0.0426848
P21810	BGN	sp|P21810|PGS1_HUMAN Biglycan OS=Homo sapiens OX=9606 GN=BGN PE=1 SV=2	1	19	19	18	50.8	41.654	2058900000	2910900000	4488300000	522180000	12036000000	11882000000	11579000000	11407000000	12542000000	20082000000	4403256000	13498400000	0.326206	DOWN	0.00822167
P02787	TF	sp|P02787|TRFE_HUMAN Serotransferrin OS=Homo sapiens OX=9606 GN=TF PE=1 SV=4	1	53	53	51	74.1	77.049	1917500000	1320400000	4203100000	1203500000	11273000000	9312000000	4283000000	15451000000	17169000000	15319000000	3983500000	12306800000	0.323683	DOWN	0.0265288
P60033	CD81	sp|P60033|CD81_HUMAN CD81 antigen OS=Homo sapiens OX=9606 GN=CD81 PE=1 SV=1	1	5	5	5	30.9	25.809	282090000	655800000	672180000	337900000	3120200000	3766400000	1808700000	2273100000	3995000000	3964800000	1013634000	3161600000	0.320608	DOWN	0.0161173
P01876	IGHA1	sp|P01876|IGHA1_HUMAN Immunoglobulin heavy constant alpha 1 OS=Homo sapiens OX=9606 GN=IGHA1 PE=1 SV=2	1	14	10	9	68.8	37.654	5213100000	3888200000	5607500000	1810200000	14003000000	14246000000	9424900000	18454000000	36992000000	16309000000	6104400000	19085180000	0.31985	DOWN	0.0360211
Q96AC1	FERMT2	sp|Q96AC1|FERM2_HUMAN Fermitin family homolog 2 OS=Homo sapiens OX=9606 GN=FERMT2 PE=1 SV=1	1	31	31	29	47.6	77.86	191360000	121970000	422690000	107940000	492060000	750080000	423650000	994360000	734070000	1385000000	267204000	857432000	0.311633	DOWN	0.0108228
P02774;CON__Q3MHN5;CON__ENSEMBL:ENSBTAP00000018229	GC	sp|P02774|VTDB_HUMAN Vitamin D-binding protein OS=Homo sapiens OX=9606 GN=GC PE=1 SV=2	3	30	30	30	58.6	52.917	835410000	539040000	986000000	374550000	3072600000	2787900000	1545900000	4128100000	5850000000	4368300000	1161520000	3736040000	0.310896	DOWN	0.0191992
P07585	DCN	sp|P07585|PGS2_HUMAN Decorin OS=Homo sapiens OX=9606 GN=DCN PE=1 SV=1	1	16	15	15	48.7	39.746	1221400000	1144100000	3199800000	221110000	15830000000	13371000000	5407300000	18969000000	11293000000	21746000000	4323282000	14157260000	0.305376	DOWN	0.0433118
Q9NR12	PDLIM7	sp|Q9NR12|PDLI7_HUMAN PDZ and LIM domain protein 7 OS=Homo sapiens OX=9606 GN=PDLIM7 PE=1 SV=1	1	16	16	16	45.7	49.844	217400000	120950000	471300000	184450000	347300000	653190000	590590000	1476700000	303590000	1372700000	268280000	879354000	0.305088	DOWN	0.0339693
Q9Y281	CFL2	sp|Q9Y281|COF2_HUMAN Cofilin-2 OS=Homo sapiens OX=9606 GN=CFL2 PE=1 SV=1	1	10	6	6	56.6	18.736	93804000	103790000	406460000	90225000	225180000	515040000	396370000	679820000	584860000	839820000	183891800	603182000	0.30487	DOWN	0.00250254
Q96S97	MYADM	sp|Q96S97|MYADM_HUMAN Myeloid-associated differentiation marker OS=Homo sapiens OX=9606 GN=MYADM PE=1 SV=2	1	2	2	2	6.5	35.273	61381000	97723000	225540000	74015000	234210000	427480000	199910000	315420000	391150000	941580000	138573800	455108000	0.304486	DOWN	0.0447528
Q9Y4G6	TLN2	sp|Q9Y4G6|TLN2_HUMAN Talin-2 OS=Homo sapiens OX=9606 GN=TLN2 PE=1 SV=4	1	71	56	56	35.1	271.61	33097000	13854000	123680000	50142000	325200000	256090000	165510000	438260000	309950000	627720000	109194600	359506000	0.303735	DOWN	0.0346856
P05546;CON__ENSEMBL:ENSBTAP00000018574	SERPIND1	sp|P05546|HEP2_HUMAN Heparin cofactor 2 OS=Homo sapiens OX=9606 GN=SERPIND1 PE=1 SV=3	2	17	17	17	34.3	57.07	95896000	130500000	288480000	108280000	698110000	646900000	341750000	1110600000	953400000	1303800000	264253200	871290000	0.30329	DOWN	0.0181493
Q6NZI2	CAVIN1	sp|Q6NZI2|CAVN1_HUMAN Caveolae-associated protein 1 OS=Homo sapiens OX=9606 GN=CAVIN1 PE=1 SV=1	1	16	16	16	46.2	43.476	692800000	517790000	1534700000	225110000	3553300000	4014000000	1825400000	4344500000	5003600000	6379700000	1304740000	4313440000	0.302482	DOWN	0.0136854
P02753	RBP4	sp|P02753|RET4_HUMAN Retinol-binding protein 4 OS=Homo sapiens OX=9606 GN=RBP4 PE=1 SV=3	1	7	7	7	40.8	23.01	30618000	41696000	38692000	20883000	141230000	129470000	95712000	162660000	318130000	198160000	54623800	180826400	0.302079	DOWN	0.0212201
Q9HBL0	TNS1	sp|Q9HBL0|TENS1_HUMAN Tensin-1 OS=Homo sapiens OX=9606 GN=TNS1 PE=1 SV=3	1	48	48	47	33.4	197.02	80307000	54529000	205280000	60109000	245940000	371030000	210800000	533880000	306760000	723390000	129233000	429172000	0.301122	DOWN	0.0162627
P27338	MAOB	sp|P27338|AOFB_HUMAN Amine oxidase [flavin-containing] B OS=Homo sapiens OX=9606 GN=MAOB PE=1 SV=3	1	19	19	17	39.6	58.762	136360000	144270000	201190000	233920000	404710000	998640000	270500000	667710000	890180000	927070000	224090000	750820000	0.29846	DOWN	0.00571023
O95865	DDAH2	sp|O95865|DDAH2_HUMAN N(G),N(G)-dimethylarginine dimethylaminohydrolase 2 OS=Homo sapiens OX=9606 GN=DDAH2 PE=1 SV=1	1	9	9	9	34.4	29.644	84584000	57399000	143030000	96492000	306010000	417620000	241550000	611160000	678890000	363510000	137503000	462546000	0.297274	DOWN	0.00765052
P02743	APCS	sp|P02743|SAMP_HUMAN Serum amyloid P-component OS=Homo sapiens OX=9606 GN=APCS PE=1 SV=2	1	9	9	9	39.9	25.387	291180000	258070000	418060000	250020000	1232400000	2177700000	1369300000	897570000	1132300000	2712900000	489946000	1657954000	0.295512	DOWN	0.0170261
P25311	AZGP1	sp|P25311|ZA2G_HUMAN Zinc-alpha-2-glycoprotein OS=Homo sapiens OX=9606 GN=AZGP1 PE=1 SV=2	1	12	12	12	40.9	34.258	70184000	70416000	126260000	27517000	204290000	275430000	211130000	439920000	497420000	266030000	99733400	337986000	0.295081	DOWN	0.00541043
P40123	CAP2	sp|P40123|CAP2_HUMAN Adenylyl cyclase-associated protein 2 OS=Homo sapiens OX=9606 GN=CAP2 PE=1 SV=1	1	12	11	11	29.8	52.823	29061000	31728000	75670000	50096000	125220000	200620000	111680000	243740000	295180000	209790000	62355000	212202000	0.293847	DOWN	0.002667
P55290	CDH13	sp|P55290|CAD13_HUMAN Cadherin-13 OS=Homo sapiens OX=9606 GN=CDH13 PE=1 SV=1	1	14	14	14	25.4	78.286	62468000	52527000	164340000	12842000	853640000	1163500000	198850000	782710000	644790000	1124800000	229163400	782930000	0.2927	DOWN	0.0475556
P43652;CON__REFSEQ:XP_585019	AFM	sp|P43652|AFAM_HUMAN Afamin OS=Homo sapiens OX=9606 GN=AFM PE=1 SV=1	2	17	17	17	29.7	69.068	65204000	26031000	186540000	29862000	398490000	366650000	140850000	718920000	683680000	509940000	141225400	484008000	0.291783	DOWN	0.0278828
P00450;CON__ENSEMBL:ENSBTAP00000031900	CP	sp|P00450|CERU_HUMAN Ceruloplasmin OS=Homo sapiens OX=9606 GN=CP PE=1 SV=1	2	40	40	40	44.8	122.2	230910000	200790000	453970000	157590000	980650000	988060000	576990000	1323700000	2668100000	1416800000	404782000	1394730000	0.290222	DOWN	0.0322513
Q9NRN5	OLFML3	sp|Q9NRN5|OLFL3_HUMAN Olfactomedin-like protein 3 OS=Homo sapiens OX=9606 GN=OLFML3 PE=2 SV=1	1	15	15	15	35.2	46.01	65921000	61497000	228530000	18566000	908040000	686650000	586350000	1178400000	835630000	1209100000	256510800	899226000	0.285257	DOWN	0.0153786
P51884	LUM	sp|P51884|LUM_HUMAN Lumican OS=Homo sapiens OX=9606 GN=LUM PE=1 SV=2	1	15	15	10	41.4	38.429	3071700000	2479100000	6903200000	751910000	26367000000	26843000000	13209000000	31403000000	24129000000	43820000000	7914582000	27880800000	0.283872	DOWN	0.019643
P09493	TPM1	sp|P09493|TPM1_HUMAN Tropomyosin alpha-1 chain OS=Homo sapiens OX=9606 GN=TPM1 PE=1 SV=2	1	31	31	14	69	32.708	6746900000	3581700000	19958000000	5158500000	10785000000	25034000000	14733000000	48658000000	15397000000	59478000000	9246020000	32660000000	0.283099	DOWN	0.0398623
P24844	MYL9	sp|P24844|MYL9_HUMAN Myosin regulatory light polypeptide 9 OS=Homo sapiens OX=9606 GN=MYL9 PE=1 SV=4	1	12	12	5	62.8	19.827	1865600000	1682400000	3564200000	1883800000	2919600000	7117400000	4572100000	10256000000	4865600000	15337000000	2383120000	8429620000	0.282708	DOWN	0.0179439
O94788	ALDH1A2	sp|O94788|AL1A2_HUMAN Retinal dehydrogenase 2 OS=Homo sapiens OX=9606 GN=ALDH1A2 PE=1 SV=3	1	18	17	15	38.8	56.723	61548000	43661000	109930000	55621000	236050000	519650000	140460000	195300000	636490000	306450000	101362000	359670000	0.281819	DOWN	0.0342157
P01008;CON__P41361	SERPINC1	sp|P01008|ANT3_HUMAN Antithrombin-III OS=Homo sapiens OX=9606 GN=SERPINC1 PE=1 SV=1	2	24	24	24	43.8	52.602	686770000	532410000	1230300000	375930000	2885600000	4545700000	1466700000	4076300000	5742900000	4471300000	1142202000	4060580000	0.28129	DOWN	0.00848794
Q6UWY5	OLFML1	sp|Q6UWY5|OLFL1_HUMAN Olfactomedin-like protein 1 OS=Homo sapiens OX=9606 GN=OLFML1 PE=1 SV=2	1	17	17	17	45	45.95	52833000	83473000	249970000	18159000	922400000	773880000	736300000	954610000	779550000	1500500000	265367000	948968000	0.279637	DOWN	0.014934
P02790	HPX	sp|P02790|HEMO_HUMAN Hemopexin OS=Homo sapiens OX=9606 GN=HPX PE=1 SV=2	1	20	20	20	61.3	51.676	1200500000	835450000	1697200000	541850000	4805000000	5165200000	3096900000	8274100000	8911500000	7158200000	1816000000	6521180000	0.278477	DOWN	0.00725402
P51608	MECP2	sp|P51608|MECP2_HUMAN Methyl-CpG-binding protein 2 OS=Homo sapiens OX=9606 GN=MECP2 PE=1 SV=1	1	18	18	18	42.8	52.44	109510000	92531000	84465000	51631000	110870000	554060000	104950000	187950000	535200000	230220000	89801400	322476000	0.278475	DOWN	0.0377307
Q13228	SELENBP1	sp|Q13228|SBP1_HUMAN Methanethiol oxidase OS=Homo sapiens OX=9606 GN=SELENBP1 PE=1 SV=2	1	21	21	21	54.4	52.39	89007000	120010000	347440000	104980000	699600000	742610000	424680000	923200000	1604600000	1218800000	272207400	982778000	0.276978	DOWN	0.0159073
P02760;CON__P00978	AMBP	sp|P02760|AMBP_HUMAN Protein AMBP OS=Homo sapiens OX=9606 GN=AMBP PE=1 SV=1	2	9	9	9	24.7	38.999	59732000	43195000	111530000	28667000	227400000	383800000	159520000	310620000	525330000	338670000	94104800	343588000	0.273888	DOWN	0.00692799
P07305	H1-0	sp|P07305|H10_HUMAN Histone H1.0 OS=Homo sapiens OX=9606 GN=H1-0 PE=1 SV=3	1	8	8	8	31.4	20.863	2496100000	3200500000	3433500000	2027700000	3929900000	20650000000	3359600000	4707000000	17274000000	9472300000	3017540000	11092580000	0.272032	DOWN	0.0462817
P02750	LRG1	sp|P02750|A2GL_HUMAN Leucine-rich alpha-2-glycoprotein OS=Homo sapiens OX=9606 GN=LRG1 PE=1 SV=2	1	11	11	11	41.2	38.177	39811000	32887000	62587000		177790000	191300000	110300000	379990000	478850000	296620000	78268750	291412000	0.268585	DOWN	0.0322429
Q9GZM7	TINAGL1	sp|Q9GZM7|TINAL_HUMAN Tubulointerstitial nephritis antigen-like OS=Homo sapiens OX=9606 GN=TINAGL1 PE=1 SV=1	1	15	15	15	55.2	52.387	11931000	128350000	204480000	102260000	372010000	707250000	265330000	530920000	537720000	1018700000	163806200	611984000	0.267664	DOWN	0.011666
Q15599	NHERF2	sp|Q15599|NHRF2_HUMAN Na(+)/H(+) exchange regulatory cofactor NHE-RF2 OS=Homo sapiens OX=9606 GN=NHERF2 PE=1 SV=2	1	7	7	7	27.3	37.413	7272300	8994100		11595000	13752000	38366000	27210000		67943000	27218000	10403350	40184250	0.258891	DOWN	0.0221528
O94760	DDAH1	sp|O94760|DDAH1_HUMAN N(G),N(G)-dimethylarginine dimethylaminohydrolase 1 OS=Homo sapiens OX=9606 GN=DDAH1 PE=1 SV=3	1	8	8	8	31.6	31.121	47238000	65701000	39249000	32266000	64684000	153570000	105680000	208800000	405180000	100120000	49827600	194670000	0.255959	DOWN	0.0335822
O76024	WFS1	sp|O76024|WFS1_HUMAN Wolframin OS=Homo sapiens OX=9606 GN=WFS1 PE=1 SV=2	1	9	9	9	10.6	100.29	15634000	31802000	51405000	19863000	72934000	172580000	62942000	128540000	218680000	168810000	38327600	150310400	0.25499	DOWN	0.0041002
P08185	SERPINA6	sp|P08185|CBG_HUMAN Corticosteroid-binding globulin OS=Homo sapiens OX=9606 GN=SERPINA6 PE=1 SV=1	1	6	6	6	19	45.14	64688000	29098000	118180000	29399000	464110000	374980000	160220000	827360000	828350000	597430000	141095000	557668000	0.253009	DOWN	0.0269029
Q14315	FLNC	sp|Q14315|FLNC_HUMAN Filamin-C OS=Homo sapiens OX=9606 GN=FLNC PE=1 SV=3	1	100	86	86	46.1	291.02	106090000	131970000	939900000	123410000	373540000	753810000	828000000	2287200000	664870000	2140900000	334982000	1334956000	0.250931	DOWN	0.0348437
P00352	ALDH1A1	sp|P00352|AL1A1_HUMAN Aldehyde dehydrogenase 1A1 OS=Homo sapiens OX=9606 GN=ALDH1A1 PE=1 SV=2	1	29	29	26	61.1	54.861	674870000	537490000	1009800000	201140000	3065300000	5442800000	4303500000	2779800000	5966800000	3926400000	1097720000	4483860000	0.244816	DOWN	0.00211811
P23141;Q9UKY3	CES1	sp|P23141|EST1_HUMAN Liver carboxylesterase 1 OS=Homo sapiens OX=9606 GN=CES1 PE=1 SV=2	2	16	16	16	34.6	62.52	12532000	59838000	28884000	19722000	89574000	292090000	81710000	67900000	303110000	124390000	42110000	173840000	0.242234	DOWN	0.0388185
P20774	OGN	sp|P20774|MIME_HUMAN Mimecan OS=Homo sapiens OX=9606 GN=OGN PE=1 SV=1	1	19	19	19	53.4	33.922	936630000	1341700000	4246200000	105690000	31857000000	31706000000	8897200000	36643000000	29316000000	53079000000	7697444000	31928240000	0.241086	DOWN	0.0319546
P01019	AGT	sp|P01019|ANGT_HUMAN Angiotensinogen OS=Homo sapiens OX=9606 GN=AGT PE=1 SV=3	1	8	8	8	17.1	53.154	44403000	37773000	129980000	33368000	314560000	362240000	182260000	571370000	904960000	436080000	112016800	491382000	0.227963	DOWN	0.0209481
P29536	LMOD1	sp|P29536|LMOD1_HUMAN Leiomodin-1 OS=Homo sapiens OX=9606 GN=LMOD1 PE=1 SV=3	1	14	14	14	26	67.029	35973000	17177000	183430000		89220000	401670000	136790000	495650000	228990000	560060000	81450000	364632000	0.223376	DOWN	0.021519
Q15746	MYLK	sp|Q15746|MYLK_HUMAN Myosin light chain kinase, smooth muscle OS=Homo sapiens OX=9606 GN=MYLK PE=1 SV=4	1	42	42	42	27	210.71	350180000	218640000	1280500000	239320000	1042200000	2561200000	1290500000	5388600000	2361900000	3865700000	626168000	3093580000	0.202409	DOWN	0.0102577
P00748	F12	sp|P00748|FA12_HUMAN Coagulation factor XII OS=Homo sapiens OX=9606 GN=F12 PE=1 SV=3	1	8	8	8	20.3	67.791	27596000	24013000	88107000	22609000	101310000	207790000	127130000	185850000	560610000	302690000	52727000	276814000	0.190478	DOWN	0.0210939
Q9BXN1	ASPN	sp|Q9BXN1|ASPN_HUMAN Asporin OS=Homo sapiens OX=9606 GN=ASPN PE=1 SV=2	1	20	20	20	62.1	43.417	170460000	219870000	883190000	156780000	4063200000	4070700000	1450000000	6346900000	5546600000	12443000000	1098700000	5971440000	0.183992	DOWN	0.0384983
P55083	MFAP4	sp|P55083|MFAP4_HUMAN Microfibril-associated glycoprotein 4 OS=Homo sapiens OX=9606 GN=MFAP4 PE=1 SV=2	1	3	3	3	20.4	28.648	731840000	251440000	1226900000		694080000	6424500000	478410000	3566200000	3280600000	7078600000	726065000	4165662000	0.174298	DOWN	0.0393636
P35749	MYH11	sp|P35749|MYH11_HUMAN Myosin-11 OS=Homo sapiens OX=9606 GN=MYH11 PE=1 SV=3	1	159	159	135	65.6	227.34	976330000	670930000	7724100000	390560000	5651200000	16797000000	7632500000	21442000000	10148000000	32794000000	3082624000	17762700000	0.173545	DOWN	0.0145244
P17661	DES	sp|P17661|DESM_HUMAN Desmin OS=Homo sapiens OX=9606 GN=DES PE=1 SV=3	1	37	32	32	70.2	53.535	257040000	461380000	8683000000	534640000	4847300000	14955000000	8292400000	25539000000	16412000000	26794000000	2956672000	18398480000	0.160702	DOWN	0.00384301
Q63ZY3	KANK2	sp|Q63ZY3|KANK2_HUMAN KN motif and ankyrin repeat domain-containing protein 2 OS=Homo sapiens OX=9606 GN=KANK2 PE=1 SV=1	1	28	28	27	32.8	91.173	25951000	5494700	155690000	13745000	189360000	538190000	157860000	648710000	576650000	509200000	78048140	486122000	0.160553	DOWN	0.00245157
P01780;A0A0B4J1V1;P01763;P01762	IGHV3-7; IGHV3-21	sp|P01780|HV307_HUMAN Immunoglobulin heavy variable 3-7 OS=Homo sapiens OX=9606 GN=IGHV3-7 PE=1 SV=2;sp|A0A0B4J1V1|HV321_HUMAN Immunoglobulin heavy variable 3-21 OS=Homo sapiens OX=9606 GN=IGHV3-21 PE=1 SV=1;sp|P01763|HV348_HUMAN Immunoglobulin heavy varia	4	3	2	1	26.5	12.943	130260000			24388000	93771000	384600000	302690000	592940000	1018000000		8.28063e+07	574557500	0.144122	DOWN	0.0497723
P02652	APOA2	sp|P02652|APOA2_HUMAN Apolipoprotein A-II OS=Homo sapiens OX=9606 GN=APOA2 PE=1 SV=1	1	7	7	7	68	11.175	74967000	102450000	2244900000	332950000	4782100000	9297500000	495220000	20733000000	16278000000	7027000000	1507473400	10766144000	0.14002	DOWN	0.0353008
P23946	CMA1	sp|P23946|CMA1_HUMAN Chymase OS=Homo sapiens OX=9606 GN=CMA1 PE=1 SV=1	1	8	8	8	43.7	27.324	49104000	51804000	376820000	15658000		919700000	605570000	1894700000	800420000		123346500	1055097500	0.116905	DOWN	0.0208322
Q9UMS6	SYNPO2	sp|Q9UMS6|SYNP2_HUMAN Synaptopodin-2 OS=Homo sapiens OX=9606 GN=SYNPO2 PE=1 SV=2	1	34	34	34	36	117.51	6548400	6963600	133340000	2048800	75197000	296840000	109470000	506290000	420500000	716010000	44819560	409822000	0.109363	DOWN	0.00828226
Q15124	PGM5	sp|Q15124|PGM5_HUMAN Phosphoglucomutase-like protein 5 OS=Homo sapiens OX=9606 GN=PGM5 PE=1 SV=2	1	28	28	28	60.3	62.224	52283000	39092000	650040000	5684400	346730000	3252200000	547780000	3340200000	892040000	5151600000	218765880	2636764000	0.0829676	DOWN	0.0231931
Q96PP8	GBP5	sp|Q96PP8|GBP5_HUMAN Guanylate-binding protein 5 OS=Homo sapiens OX=9606 GN=GBP5 PE=1 SV=1	1	18	18	18	27	66.616	40476000			561380000	4532300	6457300	4343400		8560700		2.02129e+08	6453800	31.3194	-	0.337951
P58107	EPPK1	sp|P58107|EPIPL_HUMAN Epiplakin OS=Homo sapiens OX=9606 GN=EPPK1 PE=1 SV=3	1	99	91	91	44.9	555.65	553000000	346430000	108760000	2523700000	31551000	32642000	216720000	19310000	64455000	11751000	712688200	68975600	10.3325	-	0.202348
Q03519	TAP2	sp|Q03519|TAP2_HUMAN Antigen peptide transporter 2 OS=Homo sapiens OX=9606 GN=TAP2 PE=1 SV=1	1	15	15	15	24.8	75.663	406090000	469170000	164180000	1671700000	94334000	35256000	133570000	20754000	88044000	49535000	561094800	65431800	8.57526	-	0.122649
Q10471	GALNT2	sp|Q10471|GALT2_HUMAN Polypeptide N-acetylgalactosaminyltransferase 2 OS=Homo sapiens OX=9606 GN=GALNT2 PE=1 SV=1	1	15	15	14	31.5	64.732	94209000	93056000	49736000	413430000	35233000	11117000	46587000	8417800	33884000	7187800	137132800	21438720	6.3965	-	0.13943
P12532;P17540	CKMT1A	sp|P12532|KCRU_HUMAN Creatine kinase U-type, mitochondrial OS=Homo sapiens OX=9606 GN=CKMT1A PE=1 SV=1	2	14	14	14	48.9	47.036	142390000	1047000000	476390000	221920000	169340000	38594000	165400000	28926000		29546000	411408000	65616500	6.26989	-	0.118651
Q03518	TAP1	sp|Q03518|TAP1_HUMAN Antigen peptide transporter 1 OS=Homo sapiens OX=9606 GN=TAP1 PE=1 SV=3	1	14	14	14	30.1	80.964	400540000	375010000	156420000	967450000	142020000	46445000	145930000	31782000	71753000	29715000	408288000	65125000	6.2693	-	0.0529699
Q63HN8	RNF213	sp|Q63HN8|RN213_HUMAN E3 ubiquitin-protein ligase RNF213 OS=Homo sapiens OX=9606 GN=RNF213 PE=1 SV=3	1	106	106	106	23.7	591.4	363320000	462680000	170650000	1269000000	177900000	77395000	224020000	15225000	78389000	33974000	488710000	85800600	5.69588	-	0.08639
P15090;P02689	FABP4	sp|P15090|FABP4_HUMAN Fatty acid-binding protein, adipocyte OS=Homo sapiens OX=9606 GN=FABP4 PE=1 SV=3	2	11	11	11	69.7	14.719	5604800000	1743900000	46010000	14203000	77857000	902980000	237300000	28556000	18552000	133900000	1497354000	264257600	5.66627	-	0.291015
P14902	IDO1	sp|P14902|I23O1_HUMAN Indoleamine 2,3-dioxygenase 1 OS=Homo sapiens OX=9606 GN=IDO1 PE=1 SV=1	1	14	14	14	37.7	45.326	108000000	109330000		705110000	8324200	66214000	15589000		44158000		232691050	41987000	5.54198	-	0.358839
Q16719	KYNU	sp|Q16719|KYNU_HUMAN Kynureninase OS=Homo sapiens OX=9606 GN=KYNU PE=1 SV=1	1	12	12	12	31.6	52.351	74680000	20507000	18044000	525650000	60783000	12872000	19632000		44560000		139932800	25688000	5.4474	-	0.411978
Q9Y4K1	CRYBG1	sp|Q9Y4K1|CRBG1_HUMAN Beta/gamma crystallin domain-containing protein 1 OS=Homo sapiens OX=9606 GN=CRYBG1 PE=1 SV=3	1	15	15	15	10.9	188.67	147250000	24509000	28100000	81681000		8188900	24012000		6867600		70385000	1.30228e+07	5.40474	-	0.155748
Q8IXQ6	PARP9	sp|Q8IXQ6|PARP9_HUMAN Protein mono-ADP-ribosyltransferase PARP9 OS=Homo sapiens OX=9606 GN=PARP9 PE=1 SV=2	1	19	19	19	25.4	96.342	94976000	231000000	27569000	320430000	12586000	18228000	74839000	17526000	12029000	8530100	137312200	26230420	5.23485	-	0.106683
P29728	OAS2	sp|P29728|OAS2_HUMAN 2-5-oligoadenylate synthase 2 OS=Homo sapiens OX=9606 GN=OAS2 PE=1 SV=3	1	11	11	11	18.6	82.43	101070000	95196000	89587000	298470000	33984000	18523000	46744000		19462000	10172000	123661400	23725250	5.21223	-	0.0953519
P79483	HLA-DRB3	sp|P79483|DRB3_HUMAN HLA class II histocompatibility antigen, DR beta 3 chain OS=Homo sapiens OX=9606 GN=HLA-DRB3 PE=1 SV=1	1	8	3	3	32.7	29.962	51137000	139140000		528490000	78617000	28446000	45558000	24354000	52778000	50680000	199346000	40363200	4.93881	-	0.148532
Q9Y6K5	OAS3	sp|Q9Y6K5|OAS3_HUMAN 2-5-oligoadenylate synthase 3 OS=Homo sapiens OX=9606 GN=OAS3 PE=1 SV=3	1	22	22	22	21.5	121.17	160690000	198930000	157650000	437870000	59675000	25299000	80931000	12135000	46496000		202963000	41215250	4.92446	-	0.0615055
P23381	WARS1	sp|P23381|SYWC_HUMAN Tryptophan--tRNA ligase, cytoplasmic OS=Homo sapiens OX=9606 GN=WARS1 PE=1 SV=2	1	28	28	28	58	53.165	1593600000	804520000	231050000	7505800000	869870000	592210000	425160000	202610000	849220000	184000000	2200968000	450640000	4.88409	-	0.230789
P05161	ISG15	sp|P05161|ISG15_HUMAN Ubiquitin-like protein ISG15 OS=Homo sapiens OX=9606 GN=ISG15 PE=1 SV=5	1	4	4	4	29.7	17.887	343580000	386470000	252070000	1393100000	153530000	89211000	141650000		94570000	89377000	505750000	103702000	4.87696	-	0.160082
P42224;Q14765	STAT1	sp|P42224|STAT1_HUMAN Signal transducer and activator of transcription 1-alpha/beta OS=Homo sapiens OX=9606 GN=STAT1 PE=1 SV=2	2	34	34	34	48	87.334	1260400000	605220000	409120000	3080000000	603490000	448320000	334740000	68947000	259980000	124010000	1191646000	247199400	4.82059	-	0.0946992
Q8WUF5	PPP1R13L	sp|Q8WUF5|IASPP_HUMAN RelA-associated inhibitor OS=Homo sapiens OX=9606 GN=PPP1R13L PE=1 SV=4	1	12	12	12	17.8	89.09	195450000	102640000	75959000	143970000	28513000	30697000	32089000		13841000		109306400	2.55423e+07	4.27942	-	0.0714306
Q9Y446	PKP3	sp|Q9Y446|PKP3_HUMAN Plakophilin-3 OS=Homo sapiens OX=9606 GN=PKP3 PE=1 SV=1	1	21	21	21	31.5	87.081	696830000	215720000	232040000	293130000	34423000	17315000	182410000		8539300		294428600	6.94214e+07	4.24118	-	0.18847
Q5K651	SAMD9	sp|Q5K651|SAMD9_HUMAN Sterile alpha motif domain-containing protein 9 OS=Homo sapiens OX=9606 GN=SAMD9 PE=1 SV=1	1	22	22	21	17.7	184.28	98532000	189220000	47684000	144850000	37274000	10766000	45441000		19199000		103512000	2.51353e+07	4.11819	-	0.0921361
Q9UHB6;Q9BT23	LIMA1	sp|Q9UHB6|LIMA1_HUMAN LIM domain and actin-binding protein 1 OS=Homo sapiens OX=9606 GN=LIMA1 PE=1 SV=1	2	23	23	23	32.9	85.225	171430000	80160000	293840000	407430000	16031000	65864000	88878000	18296000	21317000		193778200	48588750	3.98813	-	0.119411
Q14566	MCM6	sp|Q14566|MCM6_HUMAN DNA replication licensing factor MCM6 OS=Homo sapiens OX=9606 GN=MCM6 PE=1 SV=1	1	28	28	28	34.8	92.888	164220000	180220000	350760000	261600000	22766000	55136000	104730000	17160000	21882000		195913200	49727000	3.93978	-	0.0573293
P59665;P59666	DEFA1; DEFA3	sp|P59665|DEF1_HUMAN Neutrophil defensin 1 OS=Homo sapiens OX=9606 GN=DEFA1 PE=1 SV=1;sp|P59666|DEF3_HUMAN Neutrophil defensin 3 OS=Homo sapiens OX=9606 GN=DEFA3 PE=1 SV=1	2	4	4	4	27.7	10.201	4339700000	58994000000	18119000000	14446000000	31685000000	5018800000	9939700000	7580100000	5486500000	5295100000	25516740000	6664040000	3.82902	-	0.082267
P23921	RRM1	sp|P23921|RIR1_HUMAN Ribonucleoside-diphosphate reductase large subunit OS=Homo sapiens OX=9606 GN=RRM1 PE=1 SV=1	1	12	12	12	17.3	90.069	163070000	44379000	43407000	179850000	25685000	41950000	24117000			6213000	91278200	2.40933e+07	3.78853	-	0.183129
P16401	H1-5	sp|P16401|H15_HUMAN Histone H1.5 OS=Homo sapiens OX=9606 GN=H1-5 PE=1 SV=3	1	7	5	5	29.2	22.58	3574300000	6075200000	2927800000	2086800000	90142000	607200000	2829400000	146020000	341140000	37124000	2950848400	792176800	3.72499	-	0.0867093
P05120	SERPINB2	sp|P05120|PAI2_HUMAN Plasminogen activator inhibitor 2 OS=Homo sapiens OX=9606 GN=SERPINB2 PE=1 SV=2	1	11	11	11	27.7	46.596	29281000	586510000	33390000	19545000		13512000	116670000		7093200		167181500	45758400	3.65357	-	0.502374
P29034	S100A2	sp|P29034|S10A2_HUMAN Protein S100-A2 OS=Homo sapiens OX=9606 GN=S100A2 PE=1 SV=3	1	7	7	7	27.6	11.117	7472100000	3141900000	1552200000	10969000000	2101600000	1987000000	1720900000		491060000		5047360000	1.39965e+09	3.60615	-	0.184887
O95757	HSPA4L	sp|O95757|HS74L_HUMAN Heat shock 70 kDa protein 4L OS=Homo sapiens OX=9606 GN=HSPA4L PE=1 SV=3	1	27	23	23	44	94.511	91014000	64762000	127970000	296050000	49252000	32269000	70512000	10449000	26504000		125809600	34933500	3.6014	-	0.122768
Q30154	HLA-DRB5	sp|Q30154|DRB5_HUMAN HLA class II histocompatibility antigen, DR beta 5 chain OS=Homo sapiens OX=9606 GN=HLA-DRB5 PE=1 SV=1	1	10	5	3	32.7	30.056	493670000	478650000	234270000	3093400000	196440000	179270000	324160000	97657000	541630000	105890000	899286000	249721400	3.60116	-	0.278071
P36952	SERPINB5	sp|P36952|SPB5_HUMAN Serpin B5 OS=Homo sapiens OX=9606 GN=SERPINB5 PE=1 SV=2	1	19	19	19	63.7	42.1	2132100000	1224700000	475830000	508380000	383090000	493950000	707210000	27213000	34014000	65193000	944820000	265516000	3.55843	-	0.0969329
Q15125	EBP	sp|Q15125|EBP_HUMAN 3-beta-hydroxysteroid-Delta(8),Delta(7)-isomerase OS=Homo sapiens OX=9606 GN=EBP PE=1 SV=3	1	3	3	3	16.5	26.352	158360000	293010000	45250000	466490000	45208000	25596000	99554000		44881000		201663600	56677000	3.55812	-	0.229593
P01903	HLA-DRA	sp|P01903|DRA_HUMAN HLA class II histocompatibility antigen, DR alpha chain OS=Homo sapiens OX=9606 GN=HLA-DRA PE=1 SV=2	1	7	7	6	31.5	28.621	1373500000	1727900000	897230000	5418900000	845520000	338290000	878330000	575290000	819720000	294200000	2052610000	581166000	3.53188	-	0.12748
P47929	LGALS7	sp|P47929|LEG7_HUMAN Galectin-7 OS=Homo sapiens OX=9606 GN=LGALS7 PE=1 SV=2	1	9	9	9	77.9	15.075	7753600000	1880900000	1360800000	9642100	1106300000	570770000	2192900000	15823000		7131300	2422248420	696656075	3.47696	-	0.320853
O95573	ACSL3	sp|O95573|ACSL3_HUMAN Fatty acid CoA ligase Acsl3 OS=Homo sapiens OX=9606 GN=ACSL3 PE=1 SV=3	1	16	16	16	29.2	80.419	116090000	76212000	47358000	303100000	55523000	24477000	46845000	33696000	41164000	29108000	119656600	35058000	3.4131	-	0.113088
P08246	ELANE	sp|P08246|ELNE_HUMAN Neutrophil elastase OS=Homo sapiens OX=9606 GN=ELANE PE=1 SV=1	1	4	4	4	19.9	28.518	927020000	9996500000	4817500000	1681900000	6455900000	1789200000	953650000	1707500000	758390000	1802600000	4775764000	1402268000	3.40574	-	0.0774084
Q92597	NDRG1	sp|Q92597|NDRG1_HUMAN Protein NDRG1 OS=Homo sapiens OX=9606 GN=NDRG1 PE=1 SV=1	1	13	13	13	56.9	42.835	1669600000	646630000	182690000	423470000	160000000	295780000	232650000		147340000	52955000	616478000	182181250	3.38387	-	0.214821
P05362	ICAM1	sp|P05362|ICAM1_HUMAN Intercellular adhesion molecule 1 OS=Homo sapiens OX=9606 GN=ICAM1 PE=1 SV=2	1	8	8	8	22.9	57.825	146610000	88941000	89128000	338950000	74154000	37613000	64461000	20211000	54187000		147556600	44118000	3.34459	-	0.110835
P33241	LSP1	sp|P33241|LSP1_HUMAN Lymphocyte-specific protein 1 OS=Homo sapiens OX=9606 GN=LSP1 PE=1 SV=1	1	8	8	8	33.3	37.191	155650000	156170000	71968000	31214000		17165000	56980000		19023000		103750500	31056000	3.34076	-	0.117836
P49913	CAMP	sp|P49913|CAMP_HUMAN Cathelicidin antimicrobial peptide OS=Homo sapiens OX=9606 GN=CAMP PE=1 SV=1	1	8	8	8	35.9	19.301	26357000	481340000	73221000	43818000	169000000		25383000	75351000	46517000		158747200	4.90837e+07	3.23422	-	0.369024
Q9UM47;P46531	NOTCH3	sp|Q9UM47|NOTC3_HUMAN Neurogenic locus notch homolog protein 3 OS=Homo sapiens OX=9606 GN=NOTCH3 PE=1 SV=2	2	4	4	3	2.2	243.63	85294000	15031000	14303000	38777000	12760000	10727000	9421100			11075000	33233000	10407700	3.19312	-	0.263473
P34913	EPHX2	sp|P34913|HYES_HUMAN Bifunctional epoxide hydrolase 2 OS=Homo sapiens OX=9606 GN=EPHX2 PE=1 SV=2	1	12	12	12	33	62.615	629860000	30689000	30117000		29786000	69013000	21362000	48089000	116060000	28005000	180113000	56505800	3.18751	-	0.383914
P05164	MPO	sp|P05164|PERM_HUMAN Myeloperoxidase OS=Homo sapiens OX=9606 GN=MPO PE=1 SV=1	1	26	26	22	33.6	83.868	152550000	1451900000	561170000	276600000	616170000	139410000	171090000	306080000	152190000	194980000	611678000	192750000	3.17343	-	0.104822
P57735	RAB25	sp|P57735|RAB25_HUMAN Ras-related protein Rab-25 OS=Homo sapiens OX=9606 GN=RAB25 PE=1 SV=2	1	8	7	7	40.8	23.495	342220000	469810000	126220000	190400000	142350000	64369000	138720000		38084000		254200000	80391000	3.16205	-	0.103939
Q8TEM1	NUP210	sp|Q8TEM1|PO210_HUMAN Nuclear pore membrane glycoprotein 210 OS=Homo sapiens OX=9606 GN=NUP210 PE=1 SV=3	1	28	28	28	18.8	205.11	141430000	197520000	161600000	132090000	12459000	12905000	128440000	14152000	8018300		129019800	40878825	3.15615	-	0.0836757
P06493;Q9NYV4;O94921;Q96Q40	CDK1	sp|P06493|CDK1_HUMAN Cyclin-dependent kinase 1 OS=Homo sapiens OX=9606 GN=CDK1 PE=1 SV=3	4	13	13	11	50.8	34.095	176570000	403410000	346000000	459120000	41916000	48266000	196240000	52270000	68236000		285403200	91253000	3.1276	-	0.0746163
A8K2U0	A2ML1	sp|A8K2U0|A2ML1_HUMAN Alpha-2-macroglobulin-like protein 1 OS=Homo sapiens OX=9606 GN=A2ML1 PE=1 SV=3	1	36	36	36	32.4	161.1	841810000	655940000	12208000	8490300	153060000	75976000	244390000			10030000	334301660	110132000	3.03546	-	0.381113
P10321	HLA-C	sp|P10321|HLAC_HUMAN HLA class I histocompatibility antigen, C alpha chain OS=Homo sapiens OX=9606 GN=HLA-C PE=1 SV=3	1	11	8	5	40.2	40.648	1145500000	1455800000	653050000	2952500000	915660000	423310000	675990000	257510000	266420000	730910000	1424502000	470828000	3.02553	-	0.0512199
P01920;P05538	HLA-DQB1	sp|P01920|DQB1_HUMAN HLA class II histocompatibility antigen, DQ beta 1 chain OS=Homo sapiens OX=9606 GN=HLA-DQB1 PE=1 SV=2	2	4	4	4	19.5	29.991	105850000	96579000	121900000	326730000	49728000	29909000	93150000		41334000	21751000	140157400	46536000	3.01181	-	0.140902
P33993	MCM7	sp|P33993|MCM7_HUMAN DNA replication licensing factor MCM7 OS=Homo sapiens OX=9606 GN=MCM7 PE=1 SV=4	1	27	27	27	46.2	81.307	151330000	294520000	277930000	443650000	8877200	42601000	185040000		9976700		235261440	79205900	2.97025	-	0.188308
Q6P4A8	PLBD1	sp|Q6P4A8|PLBL1_HUMAN Phospholipase B-like 1 OS=Homo sapiens OX=9606 GN=PLBD1 PE=1 SV=2	1	11	11	11	23.5	63.254	172980000	387270000	53341000	58868000	40700000	29791000	100730000		13944000		142631800	48155000	2.96193	-	0.332538
Q02487	DSC2	sp|Q02487|DSC2_HUMAN Desmocollin-2 OS=Homo sapiens OX=9606 GN=DSC2 PE=1 SV=1	1	16	15	15	21.3	99.961	815070000	598920000	258220000	129270000	251420000	112670000	241500000		78194000		410580000	1.44121e+08	2.84885	-	0.177089
Q9Y3U8	RPL36	sp|Q9Y3U8|RL36_HUMAN 60S ribosomal protein L36 OS=Homo sapiens OX=9606 GN=RPL36 PE=1 SV=3	1	4	4	4	30.5	12.254	367040000	421120000	190980000	358030000	50318000	134220000	243610000	42836000	39759000	32998000	277497600	98684600	2.81196	-	0.0553882
P61626	LYZ	sp|P61626|LYSC_HUMAN Lysozyme C OS=Homo sapiens OX=9606 GN=LYZ PE=1 SV=1	1	7	7	7	48.6	16.537	326400000	2203100000	677990000	798980000	1900700000	350430000	496250000	227960000	561630000	469560000	1181434000	421166000	2.80515	-	0.0749918
Q5JRA6	MIA3	sp|Q5JRA6|TGO1_HUMAN Transport and Golgi organization protein 1 homolog OS=Homo sapiens OX=9606 GN=MIA3 PE=1 SV=1	1	11	11	11	5.8	213.7	140480000	108580000	32883000	523950000	57022000	41509000	97418000		45695000		172583000	6.15407e+07	2.80437	-	0.392387
O14879	IFIT3	sp|O14879|IFIT3_HUMAN Interferon-induced protein with tetratricopeptide repeats 3 OS=Homo sapiens OX=9606 GN=IFIT3 PE=1 SV=1	1	10	10	10	24.7	55.984	137300000	193260000	112200000	645300000	151950000	110970000	82651000	59962000	115600000	73924000	248002000	88621400	2.79844	-	0.152368
P32455	GBP1	sp|P32455|GBP1_HUMAN Guanylate-binding protein 1 OS=Homo sapiens OX=9606 GN=GBP1 PE=1 SV=2	1	27	27	20	41.9	67.93	2353700000	1487900000	500930000	4404400000	914080000	1597400000	665760000	298670000	627610000	266370000	1932202000	691162000	2.79558	-	0.128686
P04439	HLA-A	sp|P04439|HLAA_HUMAN HLA class I histocompatibility antigen, A alpha chain OS=Homo sapiens OX=9606 GN=HLA-A PE=1 SV=2	1	15	15	7	52.3	40.84	1834800000	2155500000	858330000	5573400000	1552700000	628050000	1017000000	423030000	1060400000	1160500000	2394946000	857796000	2.79198	-	0.102899
P28062	PSMB8	sp|P28062|PSB8_HUMAN Proteasome subunit beta type-8 OS=Homo sapiens OX=9606 GN=PSMB8 PE=1 SV=3	1	8	8	8	33	30.354	314920000	490820000	175220000	680970000	163450000	188440000	193830000	47520000	158220000	68507000	365076000	131303400	2.7804	-	0.053582
O15162	PLSCR1	sp|O15162|PLS1_HUMAN Phospholipid scramblase 1 OS=Homo sapiens OX=9606 GN=PLSCR1 PE=1 SV=1	1	4	4	4	10.7	35.049	170100000	255520000	148540000	549400000	99564000	73438000	133060000	67407000		78634000	244624800	88134750	2.77558	-	0.132649
Q96GQ7	DDX27	sp|Q96GQ7|DDX27_HUMAN Probable ATP-dependent RNA helicase DDX27 OS=Homo sapiens OX=9606 GN=DDX27 PE=1 SV=2	1	11	11	11	14.9	89.834	29935000	38557000	22156000	42823000	7615100	5662500	15455000		9399600		28217220	1.01724e+07	2.77391	-	0.0808383
P33991;Q9UJA3	MCM4	sp|P33991|MCM4_HUMAN DNA replication licensing factor MCM4 OS=Homo sapiens OX=9606 GN=MCM4 PE=1 SV=5	2	28	28	28	37.2	96.557	178490000	230830000	276720000	367900000	35645000	48012000	151060000		37133000		217917000	78735000	2.76773	-	0.125421
P49736	MCM2	sp|P49736|MCM2_HUMAN DNA replication licensing factor MCM2 OS=Homo sapiens OX=9606 GN=MCM2 PE=1 SV=4	1	20	20	20	27.3	101.89	109210000	150770000	174300000	233840000	27238000	46714000	87143000		17622000		139071600	50493000	2.75427	-	0.116074
P39748	FEN1	sp|P39748|FEN1_HUMAN Flap endonuclease 1 OS=Homo sapiens OX=9606 GN=FEN1 PE=1 SV=1	1	9	9	9	33.2	42.592	180420000	335190000	322100000	535250000	129160000	72989000	253900000		71459000	40215000	300424000	109640750	2.74008	-	0.0744039
P04440	HLA-DPB1	sp|P04440|DPB1_HUMAN HLA class II histocompatibility antigen, DP beta 1 chain OS=Homo sapiens OX=9606 GN=HLA-DPB1 PE=1 SV=1	1	7	5	5	29.1	29.159	88868000	199860000	94127000	929750000			127120000	65438000	167000000		328151250	1.19853e+08	2.73796	-	0.425972
Q96FQ6	S100A16	sp|Q96FQ6|S10AG_HUMAN Protein S100-A16 OS=Homo sapiens OX=9606 GN=S100A16 PE=1 SV=1	1	6	6	6	54.4	11.801	2605000000	2927900000	597300000	962660000	706590000	219830000	1808700000		155630000	114470000	1559890000	574657500	2.71447	-	0.185674
Q96PC5;Q8IX95	MIA2	sp|Q96PC5|MIA2_HUMAN Melanoma inhibitory activity protein 2 OS=Homo sapiens OX=9606 GN=MIA2 PE=1 SV=4	2	6	6	4	5.3	159.83	89127000	21303000		46578000	17284000		19336000		14494000	14536000	43573000	16122000	2.7027	-	0.219884
P01911	HLA-DRB1	sp|P01911|DRB1_HUMAN HLA class II histocompatibility antigen, DRB1 beta chain OS=Homo sapiens OX=9606 GN=HLA-DRB1 PE=1 SV=2	1	11	11	3	47.4	29.966	489390000	727030000	404610000	2022300000	494030000	179190000	559370000	192720000	371330000	240290000	827472000	308580000	2.68155	-	0.134581
P20160	AZU1	sp|P20160|CAP7_HUMAN Azurocidin OS=Homo sapiens OX=9606 GN=AZU1 PE=1 SV=3	1	6	6	6	39.4	26.885	214050000	1385700000	664340000		521460000	351450000	404020000	159910000	125990000		696387500	260342500	2.67489	-	0.141499
Q9NR30	DDX21	sp|Q9NR30|DDX21_HUMAN Nucleolar RNA helicase 2 OS=Homo sapiens OX=9606 GN=DDX21 PE=1 SV=5	1	21	21	19	33.5	87.343	106650000	143260000	214560000	247610000	73695000	44559000	150160000		31708000	8776200	157155000	58800800	2.67267	-	0.0700176
Q8IY21	DDX60	sp|Q8IY21|DDX60_HUMAN Probable ATP-dependent RNA helicase DDX60 OS=Homo sapiens OX=9606 GN=DDX60 PE=1 SV=3	1	22	22	21	14.2	197.85	39132000	67946000	17346000	109820000	19121000	14473000	29406000		24442000	7795100	50673000	19029025	2.66293	-	0.160429
P04233	CD74	sp|P04233|HG2A_HUMAN HLA class II histocompatibility antigen gamma chain OS=Homo sapiens OX=9606 GN=CD74 PE=1 SV=3	1	10	10	10	40.2	33.515	163460000	331270000	130590000	345570000	110480000	31294000	161870000		95617000	39752000	216274000	82133250	2.63321	-	0.0715547
P29508	SERPINB3	sp|P29508|SPB3_HUMAN Serpin B3 OS=Homo sapiens OX=9606 GN=SERPINB3 PE=1 SV=2	1	30	30	16	67.4	44.564	12643000000	12466000000	485670000	4740900000	4257100000	5359500000	6808600000	302670000	581020000	293930000	6918534000	2669144000	2.59204	-	0.167494
O43615	TIMM44	sp|O43615|TIM44_HUMAN Mitochondrial import inner membrane translocase subunit TIM44 OS=Homo sapiens OX=9606 GN=TIMM44 PE=1 SV=2	1	14	14	14	33.8	51.355	188000000	134250000	482550000	125400000	66575000	85570000	103270000	74117000	71881000	50751000	199355000	77117800	2.58507	-	0.136597
Q7L1Q6	BZW1	sp|Q7L1Q6|5MP2_HUMAN eIF5-mimic protein 2 OS=Homo sapiens OX=9606 GN=BZW1 PE=1 SV=1	1	10	10	10	23.4	48.043	303510000	235330000	187240000	781000000	230630000	154290000	216530000	99251000	121260000	82097000	347542000	134685600	2.58039	-	0.0950917
P31949	S100A11	sp|P31949|S10AB_HUMAN Protein S100-A11 OS=Homo sapiens OX=9606 GN=S100A11 PE=1 SV=2	1	10	10	10	88.6	11.74	12128000000	13182000000	3855500000	9958300000	4007900000	4093400000	7459900000	1579000000	2530700000	1119700000	8626340000	3356540000	2.57001	-	0.0505682
O95340	PAPSS2	sp|O95340|PAPS2_HUMAN Bifunctional 3-phosphoadenosine 5-phosphosulfate synthase 2 OS=Homo sapiens OX=9606 GN=PAPSS2 PE=1 SV=2	1	9	9	9	16.6	69.5	27116000	18886000	46996000	114160000	21473000		24463000	13421000	15677000		45726200	1.78537e+07	2.56117	-	0.28716
P80217	IFI35	sp|P80217|IN35_HUMAN Interferon-induced 35 kDa protein OS=Homo sapiens OX=9606 GN=IFI35 PE=1 SV=5	1	8	8	8	37.8	31.546	75386000	133250000	30244000	317420000	31836000	21983000	78770000		37823000		117627200	46192000	2.54648	-	0.360725
P10620	MGST1	sp|P10620|MGST1_HUMAN Microsomal glutathione S-transferase 1 OS=Homo sapiens OX=9606 GN=MGST1 PE=1 SV=1	1	4	4	4	27.1	17.598	134960000	186220000	21524000	260650000	37289000	30527000	87234000	41987000		42716000	128128600	50616000	2.53139	-	0.181571
Q7Z406	MYH14	sp|Q7Z406|MYH14_HUMAN Myosin-14 OS=Homo sapiens OX=9606 GN=MYH14 PE=1 SV=2	1	95	86	86	53.2	227.87	11404000000	11295000000	2877300000	5614000000	2171500000	1912700000	4983300000	3018700000	1478900000	1816400000	6672360000	2642000000	2.5255	-	0.0905019
Q8N3C0	ASCC3	sp|Q8N3C0|ASCC3_HUMAN Activating signal cointegrator 1 complex subunit 3 OS=Homo sapiens OX=9606 GN=ASCC3 PE=1 SV=3	1	23	23	23	14.3	251.46	94751000	90901000	71084000	194530000	52532000	25644000	72037000	28756000	34433000		100759600	40217500	2.50537	-	0.0791326
Q14134	TRIM29	sp|Q14134|TRI29_HUMAN Tripartite motif-containing protein 29 OS=Homo sapiens OX=9606 GN=TRIM29 PE=1 SV=2	1	25	25	25	46.1	65.834	1051600000	736080000	229470000	240890000	302820000	78676000	515790000		21817000		512172000	2.05428e+08	2.4932	-	0.260065
Q8WU39	MZB1	sp|Q8WU39|MZB1_HUMAN Marginal zone B- and B1-cell-specific protein OS=Homo sapiens OX=9606 GN=MZB1 PE=1 SV=1	1	7	7	7	62.4	20.694	1008900000	345170000	309260000	579280000	1280700000	225860000	472790000		154530000		704662000	2.84393e+08	2.47777	-	0.161914
P09914	IFIT1	sp|P09914|IFIT1_HUMAN Interferon-induced protein with tetratricopeptide repeats 1 OS=Homo sapiens OX=9606 GN=IFIT1 PE=1 SV=2	1	15	15	13	37	55.36	73197000	53950000	65572000	387050000	71212000	71183000	43234000		60196000	36218000	130196200	52707750	2.47015	-	0.325215
P49327	FASN	sp|P49327|FAS_HUMAN Fatty acid synthase OS=Homo sapiens OX=9606 GN=FASN PE=1 SV=3	1	76	76	76	41.7	273.42	390240000	1123800000	235170000	713240000	250450000	167940000	622590000	127060000	139760000	44957000	542580000	220461400	2.46111	-	0.141622
Q9NR99	MXRA5	sp|Q9NR99|MXRA5_HUMAN Matrix-remodeling-associated protein 5 OS=Homo sapiens OX=9606 GN=MXRA5 PE=1 SV=3	1	19	19	19	9.1	312.15	212360000	236640000	224830000	594930000	171550000	100390000	173540000	114740000	79729000		288062000	117099750	2.45997	-	0.0981477
P99999;CON__P62894	CYCS	sp|P99999|CYC_HUMAN Cytochrome c OS=Homo sapiens OX=9606 GN=CYCS PE=1 SV=2	2	5	5	5	49.5	11.749	1241400000	685510000	979040000	469740000	324060000	383530000	483880000		239250000	100540000	739950000	301800000	2.45179	-	0.0679018
P11215	ITGAM	sp|P11215|ITAM_HUMAN Integrin alpha-M OS=Homo sapiens OX=9606 GN=ITGAM PE=1 SV=2	1	18	18	17	18.1	127.18	61789000	267640000	75124000	80892000	75250000	25985000	84706000		26717000		112139000	4.58027e+07	2.44831	-	0.264543
O60218	AKR1B10	sp|O60218|AK1BA_HUMAN Aldo-keto reductase family 1 member B10 OS=Homo sapiens OX=9606 GN=AKR1B10 PE=1 SV=2	1	16	16	10	57.9	36.019	919130000	1029200000	21680000	235650000	653980000	365480000	315310000		24005000		571928000	2.34932e+08	2.43444	-	0.258507
P09758	TACSTD2	sp|P09758|TACD2_HUMAN Tumor-associated calcium signal transducer 2 OS=Homo sapiens OX=9606 GN=TACSTD2 PE=1 SV=3	1	13	13	13	43	35.709	1571600000	2197700000	553190000	971710000	268860000	47865000	1623600000	25992000	134620000		1112612000	458019250	2.42918	-	0.25071
Q9BV40	VAMP8	sp|Q9BV40|VAMP8_HUMAN Vesicle-associated membrane protein 8 OS=Homo sapiens OX=9606 GN=VAMP8 PE=1 SV=1	1	5	5	5	41	11.438	601320000	739390000	402930000	635990000	237490000	42445000	524920000		79984000		523424000	215783000	2.4257	-	0.111259
P18031	PTPN1	sp|P18031|PTN1_HUMAN Tyrosine-protein phosphatase non-receptor type 1 OS=Homo sapiens OX=9606 GN=PTPN1 PE=1 SV=1	1	10	10	10	25.5	49.966	113970000	98149000	71500000	210990000	82735000	38940000	113660000	31418000	28234000	26890000	115468800	47828400	2.41423	-	0.0538302
P15144	ANPEP	sp|P15144|AMPN_HUMAN Aminopeptidase N OS=Homo sapiens OX=9606 GN=ANPEP PE=1 SV=4	1	20	20	20	20.8	109.54	171720000	396450000	154030000	326320000	787800000	13664000	219970000	124500000	336140000	66927000	367264000	152240200	2.4124	-	0.132034
Q9HCE1	MOV10	sp|Q9HCE1|MOV10_HUMAN Helicase MOV-10 OS=Homo sapiens OX=9606 GN=MOV10 PE=1 SV=2	1	30	30	30	35	113.67	167820000	574970000	348960000	970350000	186040000	144170000	415790000	97489000	225300000	50139000	449628000	186577600	2.40987	-	0.144208
Q9UM00	TMCO1	sp|Q9UM00|TMCO1_HUMAN Calcium load-activated calcium channel OS=Homo sapiens OX=9606 GN=TMCO1 PE=1 SV=2	1	4	4	4	13.4	27.079	64605000	204840000	52434000	123340000		26603000	89753000	22839000			111304750	4.63983e+07	2.3989	-	0.208888
P52701	MSH6	sp|P52701|MSH6_HUMAN DNA mismatch repair protein Msh6 OS=Homo sapiens OX=9606 GN=MSH6 PE=1 SV=2	1	18	18	18	16.2	152.78	36551000	85476000	67451000	86356000		17676000	59378000		10185000		68958500	2.90797e+07	2.37136	-	0.0875096
P17301	ITGA2	sp|P17301|ITA2_HUMAN Integrin alpha-2 OS=Homo sapiens OX=9606 GN=ITGA2 PE=1 SV=2	1	19	19	19	20.2	129.29	881340000	704250000	2699200000	671830000	371230000	365310000	912140000	504470000	328300000	150690000	1065570000	452182000	2.35651	-	0.196928
P48594	SERPINB4	sp|P48594|SPB4_HUMAN Serpin B4 OS=Homo sapiens OX=9606 GN=SERPINB4 PE=1 SV=2	1	26	12	12	61.8	44.853	2348500000	2611300000	67338000	244960000	367430000	1255400000	602390000		34859000	23155000	1127905600	478951000	2.35495	-	0.371796
P16949;Q9H169	STMN1	sp|P16949|STMN1_HUMAN Stathmin OS=Homo sapiens OX=9606 GN=STMN1 PE=1 SV=3	2	12	12	10	57	17.302	544250000	994840000	746570000	1041200000	216950000	379570000	655130000	186090000	173380000	129750000	708762000	304784000	2.32546	-	0.0558057
Q9Y2Q3	GSTK1	sp|Q9Y2Q3|GSTK1_HUMAN Glutathione S-transferase kappa 1 OS=Homo sapiens OX=9606 GN=GSTK1 PE=1 SV=3	1	9	9	9	50.4	25.497	452590000	321500000	139980000	173800000	121850000	93767000	162800000	85537000	114800000	64544000	241944000	104289600	2.31992	-	0.0686813
Q13085	ACACA	sp|Q13085|ACACA_HUMAN Acetyl-CoA carboxylase 1 OS=Homo sapiens OX=9606 GN=ACACA PE=1 SV=2	1	28	28	24	16.5	265.55	40220000	92834000	36492000	145770000	15198000	13171000	60709000		11658000		66102800	2.85127e+07	2.31837	-	0.306973
P29466	CASP1	sp|P29466|CASP1_HUMAN Caspase-1 OS=Homo sapiens OX=9606 GN=CASP1 PE=1 SV=1	1	16	16	15	55.9	45.158	108370000	97820000	56500000	332550000	80509000	55371000	80087000		39473000		135149800	5.83103e+07	2.31777	-	0.297638
Q9UHD1	CHORDC1	sp|Q9UHD1|CHRD1_HUMAN Cysteine and histidine-rich domain-containing protein 1 OS=Homo sapiens OX=9606 GN=CHORDC1 PE=1 SV=2	1	11	11	11	53	37.489	36479000	40330000	58411000	123420000	58931000	21231000	35905000		25163000		63514200	27433000	2.31525	-	0.138474
Q9H6S3	EPS8L2	sp|Q9H6S3|ES8L2_HUMAN Epidermal growth factor receptor kinase substrate 8-like protein 2 OS=Homo sapiens OX=9606 GN=EPS8L2 PE=1 SV=2	1	12	12	12	25.6	80.62	175550000	150120000	59119000	154820000	56211000	38137000	92464000		44022000	31530000	119164000	51538250	2.31215	-	0.0678993
Q96AE4	FUBP1	sp|Q96AE4|FUBP1_HUMAN Far upstream element-binding protein 1 OS=Homo sapiens OX=9606 GN=FUBP1 PE=1 SV=3	1	20	17	15	31.5	67.56	125460000	307890000	312240000	475690000	150420000	101220000	280590000	75268000	92105000	44507000	274340000	118738000	2.31047	-	0.0745193
Q15738	NSDHL	sp|Q15738|NSDHL_HUMAN Sterol-4-alpha-carboxylate 3-dehydrogenase, decarboxylating OS=Homo sapiens OX=9606 GN=NSDHL PE=1 SV=2	1	11	11	11	39.4	41.9	134480000	132190000	81710000	195030000	31008000	36971000	132420000	30828000	29141000	19260000	114883600	49724000	2.31043	-	0.0964809
O15020	SPTBN2	sp|O15020|SPTN2_HUMAN Spectrin beta chain, non-erythrocytic 2 OS=Homo sapiens OX=9606 GN=SPTBN2 PE=1 SV=3	1	49	42	42	23.7	271.32	134370000	70192000	45290000	33294000	27102000	7463200	43383000		29806000		62049600	2.68841e+07	2.30804	-	0.242612
Q01469;A8MUU1	FABP5	sp|Q01469|FABP5_HUMAN Fatty acid-binding protein 5 OS=Homo sapiens OX=9606 GN=FABP5 PE=1 SV=3	2	17	17	17	87.4	15.164	46761000000	33698000000	5547600000	501740000	11262000000	23731000000	15861000000	1351500000	640210000	893680000	19554068000	8495478000	2.3017	-	0.303745
Q9BZE4	GTPBP4	sp|Q9BZE4|GTPB4_HUMAN GTP-binding protein 4 OS=Homo sapiens OX=9606 GN=GTPBP4 PE=1 SV=3	1	14	14	14	22.9	73.964	39683000	120180000	60130000	87536000	28747000	24884000	46010000	24118000	23720000		67255200	29683000	2.26578	-	0.094169
Q6PI48	DARS2	sp|Q6PI48|SYDM_HUMAN Aspartate--tRNA ligase, mitochondrial OS=Homo sapiens OX=9606 GN=DARS2 PE=1 SV=1	1	18	18	18	32.2	73.562	248930000	574830000	171170000	181960000	101870000	102760000	233780000	96836000	90348000	41520000	255752000	113048800	2.26232	-	0.147839
Q12899	TRIM26	sp|Q12899|TRI26_HUMAN Tripartite motif-containing protein 26 OS=Homo sapiens OX=9606 GN=TRIM26 PE=1 SV=1	1	11	11	11	22.1	62.165	30599000	24346000	11511000	104780000		15009000	29226000		12535000		42809000	1.89233e+07	2.26223	-	0.387899
Q13526;O15428	PIN1	sp|Q13526|PIN1_HUMAN Peptidyl-prolyl cis-trans isomerase NIMA-interacting 1 OS=Homo sapiens OX=9606 GN=PIN1 PE=1 SV=1	2	6	6	6	51.5	18.243	351630000	120800000	827030000	167260000	209000000	274380000	44340000	90121000	124400000	210260000	335144000	148700200	2.25382	-	0.205872
P29590	PML	sp|P29590|PML_HUMAN Protein PML OS=Homo sapiens OX=9606 GN=PML PE=1 SV=3	1	39	39	39	50.5	97.55	770230000	303490000	315350000	799240000	285310000	270410000	274180000	97786000	314570000	141770000	494724000	219743200	2.25137	-	0.0603731
Q9NZ08	ERAP1	sp|Q9NZ08|ERAP1_HUMAN Endoplasmic reticulum aminopeptidase 1 OS=Homo sapiens OX=9606 GN=ERAP1 PE=1 SV=3	1	30	30	30	38.9	107.23	141300000	575250000	167450000	644800000	356330000	99234000	328850000	58328000	221000000	130460000	377026000	167574400	2.2499	-	0.102262
Q8N2K0	ABHD12	sp|Q8N2K0|ABD12_HUMAN Lysophosphatidylserine lipase ABHD12 OS=Homo sapiens OX=9606 GN=ABHD12 PE=1 SV=2	1	11	11	11	38.9	45.096	111400000	270680000	70537000	168580000	65975000	55181000	124000000	33032000	37811000	56946000	137434400	61394000	2.23856	-	0.103748
O00541	PES1	sp|O00541|PESC_HUMAN Pescadillo homolog OS=Homo sapiens OX=9606 GN=PES1 PE=1 SV=1	1	12	12	12	21.6	68.002	38899000	55282000	39397000	51617000	16938000	24720000	18850000		11586000		40426600	1.83853e+07	2.19885	-	0.0568661
Q8NC51	SERBP1	sp|Q8NC51|PAIRB_HUMAN Plasminogen activator inhibitor 1 RNA-binding protein OS=Homo sapiens OX=9606 GN=SERBP1 PE=1 SV=2	1	13	13	13	33.6	44.965	212190000	236100000	105130000	236650000	40647000	98263000	90461000	71903000	79516000	39492000	166143400	75927000	2.1882	-	0.0586687
Q8IY67	RAVER1	sp|Q8IY67|RAVR1_HUMAN Ribonucleoprotein PTB-binding 1 OS=Homo sapiens OX=9606 GN=RAVER1 PE=1 SV=1	1	11	11	11	27.6	63.876	71740000	49329000	129730000	60517000	56858000	56195000	32467000	14207000	32127000		73634800	33749000	2.18184	-	0.0631554
P12830	CDH1	sp|P12830|CADH1_HUMAN Cadherin-1 OS=Homo sapiens OX=9606 GN=CDH1 PE=1 SV=3	1	12	12	12	15.3	97.455	1549300000	930200000	110110000	479990000	314570000	367700000	403080000		163930000		676834000	311570000	2.17233	-	0.332264
Q9BRA2	TXNDC17	sp|Q9BRA2|TXD17_HUMAN Thioredoxin domain-containing protein 17 OS=Homo sapiens OX=9606 GN=TXNDC17 PE=1 SV=1	1	4	4	4	43.1	13.941	1697000000	527630000	320030000	1340400000	535200000	846770000	471310000	253910000	274850000	190600000	884052000	407488000	2.16952	-	0.142929
P12004	PCNA	sp|P12004|PCNA_HUMAN Proliferating cell nuclear antigen OS=Homo sapiens OX=9606 GN=PCNA PE=1 SV=1	1	10	10	10	51	28.768	563730000	702630000	336520000	955340000	183770000	294790000	685650000	63408000	179190000	44906000	548398000	253588800	2.16255	-	0.138252
P04792	HSPB1	sp|P04792|HSPB1_HUMAN Heat shock protein beta-1 OS=Homo sapiens OX=9606 GN=HSPB1 PE=1 SV=2	1	17	17	17	86.8	22.782	24323000000	16847000000	15604000000	5468200000	7501000000	6943500000	9444800000	6296900000	3467500000	6113800000	13948640000	6453300000	2.16147	-	0.0670464
P50454	SERPINH1	sp|P50454|SERPH_HUMAN Serpin H1 OS=Homo sapiens OX=9606 GN=SERPINH1 PE=1 SV=2	1	22	22	22	53.8	46.44	716830000	682550000	1501900000	1532400000	427530000	484730000	490400000	662030000	282200000	330210000	972242000	449914000	2.16095	-	0.0592724
P11908	PRPS2	sp|P11908|PRPS2_HUMAN Ribose-phosphate pyrophosphokinase 2 OS=Homo sapiens OX=9606 GN=PRPS2 PE=1 SV=2	1	14	6	5	56	34.769	575400000	511990000	237020000	938710000	223690000	259260000	230320000	93668000	370090000	201510000	497362000	230969600	2.15337	-	0.0906361
Q9UIV8	SERPINB13	sp|Q9UIV8|SPB13_HUMAN Serpin B13 OS=Homo sapiens OX=9606 GN=SERPINB13 PE=1 SV=2	1	10	10	10	30.2	44.276	928400000	751310000	36681000	355060000	268490000	256020000	377210000		21364000		467988200	218198000	2.14479	-	0.319587
Q96AG4	LRRC59	sp|Q96AG4|LRC59_HUMAN Leucine-rich repeat-containing protein 59 OS=Homo sapiens OX=9606 GN=LRRC59 PE=1 SV=1	1	12	12	12	50.2	34.93	661580000	602730000	580080000	1326700000	390720000	255980000	599000000	253950000	417740000	135910000	712362000	332516000	2.14234	-	0.0668021
P52789	HK2	sp|P52789|HXK2_HUMAN Hexokinase-2 OS=Homo sapiens OX=9606 GN=HK2 PE=1 SV=2	1	14	11	10	18.4	102.38	181380000	45387000	22823000	30329000	30770000	41127000	39594000		6473300		62137800	2.90648e+07	2.13791	-	0.449459
P20042	EIF2S2	sp|P20042|IF2B_HUMAN Eukaryotic translation initiation factor 2 subunit 2 OS=Homo sapiens OX=9606 GN=EIF2S2 PE=1 SV=2	1	12	12	12	34.2	38.388	13086000000	8693900000	6901200000	13836000000	4291800000	3480500000	10729000000	621760000	3572400000	3581200000	9361780000	4396972000	2.12914	-	0.0798879
O00154;Q6ZUV0	ACOT7	sp|O00154|BACH_HUMAN Cytosolic acyl coenzyme A thioester hydrolase OS=Homo sapiens OX=9606 GN=ACOT7 PE=1 SV=3	2	10	10	10	32.1	41.796	85049000	310070000	107900000	182850000	32397000	55665000	112490000		34775000		143653200	6.76433e+07	2.12369	-	0.295728
Q9BY44	EIF2A	sp|Q9BY44|EIF2A_HUMAN Eukaryotic translation initiation factor 2A OS=Homo sapiens OX=9606 GN=EIF2A PE=1 SV=3	1	11	11	11	23.1	64.989	89049000	208830000	95365000	129250000	70348000	49410000	113330000	31120000	49038000	36578000	118568400	55895200	2.12126	-	0.0598671
Q15418	RPS6KA1	sp|Q15418|KS6A1_HUMAN Ribosomal protein S6 kinase alpha-1 OS=Homo sapiens OX=9606 GN=RPS6KA1 PE=1 SV=2	1	13	9	9	19.9	82.722	16638000	34687000	61656000	41393000		23997000	18954000		11749000		38593500	1.82333e+07	2.11665	-	0.134
P15104	GLUL	sp|P15104|GLNA_HUMAN Glutamine synthetase OS=Homo sapiens OX=9606 GN=GLUL PE=1 SV=4	1	10	10	10	27.6	42.064	88692000	420560000	152240000	369870000	225740000	43064000	307660000		70571000	55387000	251420400	119170500	2.10975	-	0.187255
Q9HB40	SCPEP1	sp|Q9HB40|RISC_HUMAN Retinoid-inducible serine carboxypeptidase OS=Homo sapiens OX=9606 GN=SCPEP1 PE=1 SV=1	1	6	6	6	15.9	50.83	317130000	329570000	127870000	597140000	200380000	144670000	307530000	64332000	160340000	68377000	314418000	149049800	2.10948	-	0.107868
Q03701	CEBPZ	sp|Q03701|CEBPZ_HUMAN CCAAT/enhancer-binding protein zeta OS=Homo sapiens OX=9606 GN=CEBPZ PE=1 SV=3	1	8	8	8	7.6	120.97	46671000	96859000	48778000	78644000	17531000	14058000	48253000		19898000		57696600	27403000	2.10548	-	0.178799
Q969U7	PSMG2	sp|Q969U7|PSMG2_HUMAN Proteasome assembly chaperone 2 OS=Homo sapiens OX=9606 GN=PSMG2 PE=1 SV=1	1	5	5	5	18.2	29.396	88895000	106770000	76192000	215750000		59363000	71961000		42643000		121901750	57989000	2.10215	-	0.157034
P05109	S100A8	sp|P05109|S10A8_HUMAN Protein S100-A8 OS=Homo sapiens OX=9606 GN=S100A8 PE=1 SV=1	1	12	12	12	82.8	10.834	9194700000	7410000000	6552100000	14526000000	12425000000	4657800000	14072000000	1359600000	2341900000	1439300000	10021560000	4774120000	2.09914	-	0.101349
Q8IV08	PLD3	sp|Q8IV08|PLD3_HUMAN 5-3 exonuclease PLD3 OS=Homo sapiens OX=9606 GN=PLD3 PE=1 SV=1	1	7	7	7	16.5	54.705	283970000	246380000	113230000	339830000	132610000		125360000	83005000	110690000		223204000	1.06352e+08	2.09874	-	0.0946082
Q8WW12	PCNP	sp|Q8WW12|PCNP_HUMAN PEST proteolytic signal-containing nuclear protein OS=Homo sapiens OX=9606 GN=PCNP PE=1 SV=2	1	2	2	2	17.4	18.925	83908000	127600000	47128000	33528000		48700000	31193000		24681000		73041000	34858000	2.09539	-	0.196652
P08311	CTSG	sp|P08311|CATG_HUMAN Cathepsin G OS=Homo sapiens OX=9606 GN=CTSG PE=1 SV=2	1	11	11	11	45.5	28.837	182250000	1271900000	666600000	194630000	8608400000	715260000	924450000	1134000000	466990000	1981600000	2184756000	1044460000	2.09176	-	0.506258
A0MZ66	SHTN1	sp|A0MZ66|SHOT1_HUMAN Shootin-1 OS=Homo sapiens OX=9606 GN=SHTN1 PE=1 SV=4	1	12	12	12	22.7	71.639	119860000	94877000	42009000	64378000	24487000	42614000	50456000	14894000	24313000		69122200	33069250	2.09023	-	0.128014
O95470	SGPL1	sp|O95470|SGPL1_HUMAN Sphingosine-1-phosphate lyase 1 OS=Homo sapiens OX=9606 GN=SGPL1 PE=1 SV=3	1	8	8	8	16	63.523	168550000	170150000	139860000	241340000	66731000	45020000	152560000		45344000	58284000	157326200	75302000	2.08927	-	0.0748481
Q9UNX4	WDR3	sp|Q9UNX4|WDR3_HUMAN WD repeat-containing protein 3 OS=Homo sapiens OX=9606 GN=WDR3 PE=1 SV=1	1	10	10	10	12.7	106.1	47764000	68122000	90039000	114820000	21663000	24429000	45588000		28395000		68481600	32804000	2.0876	-	0.15731
P29353;Q6S5L8;P98077	SHC1	sp|P29353|SHC1_HUMAN SHC-transforming protein 1 OS=Homo sapiens OX=9606 GN=SHC1 PE=1 SV=4	3	5	5	5	9.6	62.821	16794000	23332000	16288000	33137000		9106100	10926000		12311000		22387750	1.0781e+07	2.07659	-	0.0569078
Q9UJS0	SLC25A13	sp|Q9UJS0|S2513_HUMAN Electrogenic aspartate/glutamate antiporter SLC25A13, mitochondrial OS=Homo sapiens OX=9606 GN=SLC25A13 PE=1 SV=2	1	16	14	14	25.9	74.175	179460000	109840000	88975000	68037000	54917000	43407000	82187000	24827000	64035000	26946000	100245800	48280400	2.07632	-	0.06679
P05107	ITGB2	sp|P05107|ITB2_HUMAN Integrin beta-2 OS=Homo sapiens OX=9606 GN=ITGB2 PE=1 SV=2	1	20	20	20	30.2	84.781	546060000	893090000	464570000	386190000	353750000	196600000	680550000	95519000	166730000	133880000	528732000	254655800	2.07626	-	0.0954024
Q86Y56	DNAAF5	sp|Q86Y56|DAAF5_HUMAN Dynein axonemal assembly factor 5 OS=Homo sapiens OX=9606 GN=DNAAF5 PE=1 SV=4	1	7	7	7	10.6	93.52	20609000	34536000	11339000	53289000		12806000	19099000	19542000	12664000	8176800	29943250	14457560	2.07111	-	0.107061
P63313;CON__P21752	TMSB10	sp|P63313|TYB10_HUMAN Thymosin beta-10 OS=Homo sapiens OX=9606 GN=TMSB10 PE=1 SV=2	2	3	2	2	50	5.0256	165970000	192950000	50965000	233060000	29063000	102310000	65479000		27054000		134401600	6.49477e+07	2.06938	-	0.259775
O00571;O15523	DDX3X; DDX3Y	sp|O00571|DDX3X_HUMAN ATP-dependent RNA helicase DDX3X OS=Homo sapiens OX=9606 GN=DDX3X PE=1 SV=3;sp|O15523|DDX3Y_HUMAN ATP-dependent RNA helicase DDX3Y OS=Homo sapiens OX=9606 GN=DDX3Y PE=1 SV=2	2	26	25	23	43.4	73.243	410980000	550160000	330310000	801140000	269050000	197770000	445500000	179920000	180490000	138260000	472328000	228388000	2.06809	-	0.0566848
P48735	IDH2	sp|P48735|IDHP_HUMAN Isocitrate dehydrogenase [NADP], mitochondrial OS=Homo sapiens OX=9606 GN=IDH2 PE=1 SV=2	1	26	26	24	53.8	50.909	5442400000	3375900000	1889300000	2676700000	1179200000	1363200000	2879700000	955350000	1085700000	775390000	2912700000	1411868000	2.06301	-	0.106235
Q6P2E9	EDC4	sp|Q6P2E9|EDC4_HUMAN Enhancer of mRNA-decapping protein 4 OS=Homo sapiens OX=9606 GN=EDC4 PE=1 SV=1	1	16	16	16	15.6	151.66	111840000	182340000	47605000	124000000	55968000	35654000	80503000	28150000	58095000		104350600	50600500	2.06224	-	0.113711
Q14247	CTTN	sp|Q14247|SRC8_HUMAN Src substrate cortactin OS=Homo sapiens OX=9606 GN=CTTN PE=1 SV=2	1	14	14	14	28.5	61.585	372450000	242280000	199770000	234850000	72814000	95245000	144140000	213320000	67578000	27672000	224432800	109591000	2.04791	-	0.0816973
P09669	COX6C	sp|P09669|COX6C_HUMAN Cytochrome c oxidase subunit 6C OS=Homo sapiens OX=9606 GN=COX6C PE=1 SV=2	1	4	4	4	48	8.7813	515180000	882410000	1031300000	748950000	316570000	120260000	564170000		354230000	327570000	698882000	341557500	2.04616	-	0.0675535
Q9BQE5	APOL2	sp|Q9BQE5|APOL2_HUMAN Apolipoprotein L2 OS=Homo sapiens OX=9606 GN=APOL2 PE=1 SV=2	1	10	10	10	27.6	37.078	196760000	210900000	49142000	432780000	116210000	96546000	111500000	100340000	118120000	65154000	201158400	98332000	2.04571	-	0.154993
Q99961;Q99962	SH3GL1	sp|Q99961|SH3G1_HUMAN Endophilin-A2 OS=Homo sapiens OX=9606 GN=SH3GL1 PE=1 SV=1	2	10	10	10	28	41.489	349500000	174550000	97991000	341200000		142620000	109410000	109820000	119420000	107520000	240810250	117758000	2.04496	-	0.0613374
P10586	PTPRF	sp|P10586|PTPRF_HUMAN Receptor-type tyrosine-protein phosphatase F OS=Homo sapiens OX=9606 GN=PTPRF PE=1 SV=2	1	40	40	39	32.2	212.88	457660000	222010000	37755000	49657000	23994000	76092000	205030000	32198000	30132000	43863000	158215200	77463000	2.04246	-	0.392619
P54709	ATP1B3	sp|P54709|AT1B3_HUMAN Sodium/potassium-transporting ATPase subunit beta-3 OS=Homo sapiens OX=9606 GN=ATP1B3 PE=1 SV=1	1	6	6	6	26.5	31.512	334990000	1121600000	633540000	754060000	472890000	180520000	616090000	216790000	287130000		663416000	325132500	2.04045	-	0.0960678
Q96P70	IPO9	sp|Q96P70|IPO9_HUMAN Importin-9 OS=Homo sapiens OX=9606 GN=IPO9 PE=1 SV=3	1	16	16	16	19.2	115.96	152760000	195220000	150240000	252160000	76052000	89663000	126150000	38540000	69764000		165286400	81029250	2.03984	-	0.0547946
Q8WUW1	BRK1	sp|Q8WUW1|BRK1_HUMAN Protein BRICK1 OS=Homo sapiens OX=9606 GN=BRK1 PE=1 SV=1	1	4	4	4	53.3	8.7448	136960000	125420000	71435000	62310000	49817000	36228000	33401000		61628000		89188400	4.37523e+07	2.03848	-	0.111204
P67809	YBX1	sp|P67809|YBOX1_HUMAN Y-box-binding protein 1 OS=Homo sapiens OX=9606 GN=YBX1 PE=1 SV=3	1	6	6	3	25.9	35.924	257640000	247020000	197020000	302000000	46330000	166890000	110210000	140300000	63871000	35263000	210002000	103306800	2.0328	-	0.0669264
Q16740	CLPP	sp|Q16740|CLPP_HUMAN ATP-dependent Clp protease proteolytic subunit, mitochondrial OS=Homo sapiens OX=9606 GN=CLPP PE=1 SV=1	1	6	6	6	26.7	30.18	90763000	52113000	42689000	64004000		34774000	32747000		24612000		62392250	30711000	2.03159	-	0.0534456
P49674;P48730	CSNK1E; CSNK1D	sp|P49674|KC1E_HUMAN Casein kinase I isoform epsilon OS=Homo sapiens OX=9606 GN=CSNK1E PE=1 SV=1;sp|P48730|KC1D_HUMAN Casein kinase I isoform delta OS=Homo sapiens OX=9606 GN=CSNK1D PE=1 SV=2	2	6	6	6	16.3	47.315	57861000	80373000	32944000	88227000	19392000	15861000	55064000	21022000	23747000	21944000	55759400	27527600	2.02558	-	0.0962692
P53602	MVD	sp|P53602|MVD1_HUMAN Diphosphomevalonate decarboxylase OS=Homo sapiens OX=9606 GN=MVD PE=1 SV=1	1	8	8	8	24.8	43.404	31382000	85467000	39238000	44972000	37008000	29778000	32084000		18360000	13834000	47613400	23514000	2.0249	-	0.0778032
O95571	ETHE1	sp|O95571|ETHE1_HUMAN Persulfide dioxygenase ETHE1, mitochondrial OS=Homo sapiens OX=9606 GN=ETHE1 PE=1 SV=2	1	11	11	11	67.7	27.873	3075200000	1259000000	734740000	810560000	510800000	703540000	1735600000	178790000	342840000	195880000	1278060000	631330000	2.02439	-	0.272891
P11166	SLC2A1	sp|P11166|GTR1_HUMAN Solute carrier family 2, facilitated glucose transporter member 1 OS=Homo sapiens OX=9606 GN=SLC2A1 PE=1 SV=2	1	6	6	6	14	54.083	1385900000	443240000	370840000	203560000	105470000	60493000	246420000	666230000	121710000	145770000	501802000	248124600	2.02238	-	0.346181
Q12904	AIMP1	sp|Q12904|AIMP1_HUMAN Aminoacyl tRNA synthase complex-interacting multifunctional protein 1 OS=Homo sapiens OX=9606 GN=AIMP1 PE=1 SV=2	1	13	13	13	56.7	34.352	164640000	161180000	116010000	254290000	103700000	77983000	172950000	51738000	73710000	20874000	159964000	79451000	2.01337	-	0.0597812
P40121	CAPG	sp|P40121|CAPG_HUMAN Macrophage-capping protein OS=Homo sapiens OX=9606 GN=CAPG PE=1 SV=2	1	11	11	11	44.3	38.498	2446500000	2340100000	1187000000	1596900000	1053900000	1137800000	1655700000	361950000	745390000	408520000	1724880000	861872000	2.00132	-	0.0509423
O95786	RIGI	sp|O95786|RIGI_HUMAN Antiviral innate immune response receptor RIG-I OS=Homo sapiens OX=9606 GN=RIGI PE=1 SV=2	1	16	16	16	18.4	106.6	58564000	36523000	39389000	127080000	61866000	38680000	34097000		24382000		64684400	3.23863e+07	1.99727	-	0.193623
P22102	GART	sp|P22102|PUR2_HUMAN Trifunctional purine biosynthetic protein adenosine-3 OS=Homo sapiens OX=9606 GN=GART PE=1 SV=1	1	25	25	25	30.9	107.77	308220000	124260000	119270000	180440000	89339000	131900000	122110000	56031000	60511000	41719000	164305800	82454200	1.99269	-	0.0938296
P61513;A6NKH3	RPL37A	sp|P61513|RL37A_HUMAN 60S ribosomal protein L37a OS=Homo sapiens OX=9606 GN=RPL37A PE=1 SV=2	2	3	3	3	38	10.275	433320000	399730000	280310000	811520000	188490000	124720000	377270000		247840000	98812000	422674000	212160500	1.99224	-	0.158012
P33240	CSTF2	sp|P33240|CSTF2_HUMAN Cleavage stimulation factor subunit 2 OS=Homo sapiens OX=9606 GN=CSTF2 PE=1 SV=1	1	5	5	5	11.4	60.959	152960000	133900000	203570000	297500000		101270000	115350000		81053000		196982500	9.92243e+07	1.98522	-	0.077375
Q8IUR0	TRAPPC5	sp|Q8IUR0|TPPC5_HUMAN Trafficking protein particle complex subunit 5 OS=Homo sapiens OX=9606 GN=TRAPPC5 PE=1 SV=1	1	3	3	3	14.4	20.783	133150000	98409000	39420000	87971000	42769000	43690000	53104000	37931000	34216000	34074000	80343800	40603000	1.97877	-	0.0588365
Q9BVJ7	DUSP23	sp|Q9BVJ7|DUS23_HUMAN Dual specificity protein phosphatase 23 OS=Homo sapiens OX=9606 GN=DUSP23 PE=1 SV=1	1	10	10	10	79.3	16.588	49484000	79221000	59236000	142310000	36064000	37159000	51943000	39438000	37186000	19754000	73263000	37096000	1.97496	-	0.0983014
P23497;Q9H930	SP100	sp|P23497|SP100_HUMAN Nuclear autoantigen Sp-100 OS=Homo sapiens OX=9606 GN=SP100 PE=1 SV=3	2	11	8	8	12.5	100.42	211500000	288190000	175910000	545640000	163750000	150920000	189670000	80085000	145720000	135960000	276998000	140471000	1.97192	-	0.0974053
Q15181	PPA1	sp|Q15181|IPYR_HUMAN Inorganic pyrophosphatase OS=Homo sapiens OX=9606 GN=PPA1 PE=1 SV=2	1	15	15	15	74.4	32.66	550530000	829570000	320410000	1035400000	395820000	409180000	569160000	215870000	272040000	122490000	626346000	317748000	1.9712	-	0.0823788
Q9HC35	EML4	sp|Q9HC35|EMAL4_HUMAN Echinoderm microtubule-associated protein-like 4 OS=Homo sapiens OX=9606 GN=EML4 PE=1 SV=3	1	24	24	24	29	108.91	200540000	227620000	119840000	167330000	87982000	70090000	203010000	30699000	90953000	13829000	160662400	81716200	1.9661	-	0.0966804
Q00688	FKBP3	sp|Q00688|FKBP3_HUMAN Peptidyl-prolyl cis-trans isomerase FKBP3 OS=Homo sapiens OX=9606 GN=FKBP3 PE=1 SV=1	1	10	10	10	50.4	25.177	263450000	161890000	179600000	382430000	73872000	158370000	122330000	67811000	119870000	71511000	212248400	107978400	1.96566	-	0.0938065
Q9HD26	GOPC	sp|Q9HD26|GOPC_HUMAN Golgi-associated PDZ and coiled-coil motif-containing protein OS=Homo sapiens OX=9606 GN=GOPC PE=1 SV=1	1	10	10	10	25.1	50.519	33614000	19344000	32149000	97770000	23613000	22507000	21262000		19446000		41298000	2.10717e+07	1.95988	-	0.331841
Q14444	CAPRIN1	sp|Q14444|CAPR1_HUMAN Caprin-1 OS=Homo sapiens OX=9606 GN=CAPRIN1 PE=1 SV=2	1	8	8	8	9.6	78.365	281240000	164050000	213350000	464400000	156670000	94611000	166180000	116910000	128600000	146940000	255942000	130648200	1.95902	-	0.0626836
Q9GZZ1	NAA50	sp|Q9GZZ1|NAA50_HUMAN N-alpha-acetyltransferase 50 OS=Homo sapiens OX=9606 GN=NAA50 PE=1 SV=1	1	5	5	5	32	19.398	121760000	150330000	86567000	188310000	52871000	57400000	104350000		50639000	32667000	119967600	61264000	1.95821	-	0.0913948
P61769	B2M	sp|P61769|B2MG_HUMAN Beta-2-microglobulin OS=Homo sapiens OX=9606 GN=B2M PE=1 SV=1	1	4	4	4	54.6	13.714	680310000	2086200000	2354200000	8590900000	2995100000	1008900000	1723500000	1794100000	1377400000	2650700000	3341342000	1710920000	1.95295	-	0.275473
Q9HCN8	SDF2L1	sp|Q9HCN8|SDF2L_HUMAN Stromal cell-derived factor 2-like protein 1 OS=Homo sapiens OX=9606 GN=SDF2L1 PE=1 SV=2	1	5	5	5	32.1	23.598	94300000	92959000	83852000	224380000	134770000	40229000	135330000	41502000	50858000	55200000	126052200	64623800	1.95055	-	0.0882383
P31944	CASP14	sp|P31944|CASPE_HUMAN Caspase-14 OS=Homo sapiens OX=9606 GN=CASP14 PE=1 SV=2	1	23	23	23	77.3	27.679	2102300000	1522200000	5584300	604260000	9976300	1362000000	250140000	85855000	43042000		848864120	435259250	1.95025	-	0.474873
Q10589	BST2	sp|Q10589|BST2_HUMAN Bone marrow stromal antigen 2 OS=Homo sapiens OX=9606 GN=BST2 PE=1 SV=1	1	2	2	2	13.9	19.769	266000000	132270000	74643000	276950000		85487000	121490000		63958000	114200000	187465750	96283750	1.94701	-	0.128211
P42766	RPL35	sp|P42766|RL35_HUMAN 60S ribosomal protein L35 OS=Homo sapiens OX=9606 GN=RPL35 PE=1 SV=2	1	5	5	5	33.3	14.551	617270000	777490000	302870000	746400000	358300000	352600000	539860000	99790000	349960000	97481000	560466000	287938200	1.94648	-	0.0684224
P68363;A6NHL2;Q9H853	TUBA1B	sp|P68363|TBA1B_HUMAN Tubulin alpha-1B chain OS=Homo sapiens OX=9606 GN=TUBA1B PE=1 SV=1	3	26	2	0	74.1	50.151	390390000	133390000	101840000	62338000	64777000	50875000			62028000	119590000	150547000	7.74977e+07	1.9426	-	0.414207
Q02809	PLOD1	sp|Q02809|PLOD1_HUMAN Procollagen-lysine,2-oxoglutarate 5-dioxygenase 1 OS=Homo sapiens OX=9606 GN=PLOD1 PE=1 SV=2	1	15	15	15	27.4	83.549	87829000	118550000	86818000	227880000	24626000	37718000	85791000	67996000	33828000		109140600	56333250	1.93741	-	0.221948
Q9Y385	UBE2J1	sp|Q9Y385|UB2J1_HUMAN Ubiquitin-conjugating enzyme E2 J1 OS=Homo sapiens OX=9606 GN=UBE2J1 PE=1 SV=2	1	2	2	2	9.4	35.198	18999000	17573000	15980000	29007000	41181000	13260000	13326000		11436000		24548000	12674000	1.93688	-	0.110079
O43681	GET3	sp|O43681|GET3_HUMAN ATPase GET3 OS=Homo sapiens OX=9606 GN=GET3 PE=1 SV=2	1	10	10	10	38.5	38.792	424560000	237700000	1104800000	273190000	179510000	243380000	259570000	230300000	265440000	150810000	443952000	229900000	1.93107	-	0.246933
Q16658	FSCN1	sp|Q16658|FSCN1_HUMAN Fascin OS=Homo sapiens OX=9606 GN=FSCN1 PE=1 SV=3	1	24	24	24	52.9	54.529	979060000	520450000	553850000	1511900000	556730000	526120000	521800000	391620000	420600000	277030000	824398000	427434000	1.92871	-	0.0786955
O43847	NRDC	sp|O43847|NRDC_HUMAN Nardilysin OS=Homo sapiens OX=9606 GN=NRDC PE=1 SV=3	1	14	14	14	14.7	131.7	92387000	69550000	79921000	171860000	32252000	54826000	49445000		52889000	28497000	89194000	46414250	1.92169	-	0.151726
O95793	STAU1	sp|O95793|STAU1_HUMAN Double-stranded RNA-binding protein Staufen homolog 1 OS=Homo sapiens OX=9606 GN=STAU1 PE=1 SV=2	1	16	16	15	33.3	63.182	89089000	88301000	47533000	117110000	26214000	47682000	64294000	30820000	26991000	21886000	73649400	38334600	1.92123	-	0.0856228
P78347;Q6EKJ0;Q86UP8	GTF2I	sp|P78347|GTF2I_HUMAN General transcription factor II-I OS=Homo sapiens OX=9606 GN=GTF2I PE=1 SV=2	3	26	26	26	27	112.42	252100000	348020000	387850000	216220000	168530000	139260000	294310000	41630000	147660000	96259000	274544000	143823800	1.90889	-	0.0563617
P62328	TMSB4X	sp|P62328|TYB4_HUMAN Thymosin beta-4 OS=Homo sapiens OX=9606 GN=TMSB4X PE=1 SV=2	1	7	7	6	77.3	5.0526	2626400000	3376600000	1274800000	6235400000	1028600000	3190400000	1972500000	758590000	1063900000	641250000	2908360000	1525328000	1.90671	-	0.224968
Q92947	GCDH	sp|Q92947|GCDH_HUMAN Glutaryl-CoA dehydrogenase, mitochondrial OS=Homo sapiens OX=9606 GN=GCDH PE=1 SV=1	1	8	8	8	29.2	48.127	64244000	72696000	429330000	71710000	62000000	82836000	71468000	65849000	91268000	55787000	139996000	73441600	1.90622	-	0.386285
P35221;Q9UI47	CTNNA1	sp|P35221|CTNA1_HUMAN Catenin alpha-1 OS=Homo sapiens OX=9606 GN=CTNNA1 PE=1 SV=1	2	40	40	29	50.2	100.07	1913200000	1199600000	627890000	1295700000	638760000	651370000	1089100000	307070000	645900000	290050000	1135030000	596698000	1.90219	-	0.0904738
Q15382	RHEB	sp|Q15382|RHEB_HUMAN GTP-binding protein Rheb OS=Homo sapiens OX=9606 GN=RHEB PE=1 SV=1	1	5	5	5	23.4	20.497	100400000	246690000	113870000	243720000	94443000	85706000	138470000	47233000	64761000		159824600	84042500	1.90171	-	0.123719
P27708	CAD	sp|P27708|PYR1_HUMAN CAD protein OS=Homo sapiens OX=9606 GN=CAD PE=1 SV=3	1	45	45	44	26.4	242.98	180280000	227300000	235780000	162340000	118180000	93874000	210660000	18943000	100730000	62437000	184776000	97328800	1.89847	-	0.0526289
Q92542	NCSTN	sp|Q92542|NICA_HUMAN Nicastrin OS=Homo sapiens OX=9606 GN=NCSTN PE=1 SV=2	1	6	6	6	8.2	78.41	112410000	144620000	91066000	235510000	59824000	65831000	112350000	55266000	58417000	47580000	128686000	67888800	1.89554	-	0.0956576
P06702	S100A9	sp|P06702|S10A9_HUMAN Protein S100-A9 OS=Homo sapiens OX=9606 GN=S100A9 PE=1 SV=1	1	9	9	9	82.5	13.242	7963500000	8642000000	7215000000	13671000000	15870000000	4533800000	16244000000	2096200000	3709400000	1569100000	10672300000	5630500000	1.89544	-	0.154786
Q8NE71	ABCF1	sp|Q8NE71|ABCF1_HUMAN ATP-binding cassette sub-family F member 1 OS=Homo sapiens OX=9606 GN=ABCF1 PE=1 SV=2	1	14	14	14	20.5	95.925	77032000	126470000	139440000	256850000	111990000	52964000	99910000	42428000	105180000		142356400	75120500	1.89504	-	0.114415
Q9BQ75	CMSS1	sp|Q9BQ75|CMS1_HUMAN Protein CMSS1 OS=Homo sapiens OX=9606 GN=CMSS1 PE=1 SV=2	1	3	3	3	10.4	31.884		91823000	54498000	20526000	12210000	23251000	29650000		23137000	18498000	44764250	23634000	1.89406	-	0.292182
Q14149	MORC3	sp|Q14149|MORC3_HUMAN MORC family CW-type zinc finger protein 3 OS=Homo sapiens OX=9606 GN=MORC3 PE=1 SV=3	1	10	10	10	14.9	107.11	106370000	55937000	60803000	34619000	37001000	30163000	50980000		28914000	14887000	58946000	31236000	1.88712	-	0.12756
P52888	THOP1	sp|P52888|THOP1_HUMAN Thimet oligopeptidase OS=Homo sapiens OX=9606 GN=THOP1 PE=1 SV=2	1	17	17	17	25.5	78.839	83046000	47419000	49402000	180950000	44535000	67727000	47827000	42407000	40034000	16976000	81070400	42994200	1.88561	-	0.198769
P40306	PSMB10	sp|P40306|PSB10_HUMAN Proteasome subunit beta type-10 OS=Homo sapiens OX=9606 GN=PSMB10 PE=1 SV=1	1	9	9	9	40.7	28.936	527940000	327410000	195400000	745990000	189050000	180220000	331710000	109230000	221890000		397158000	210762500	1.88439	-	0.187756
P82933	MRPS9	sp|P82933|RT09_HUMAN 28S ribosomal protein S9, mitochondrial OS=Homo sapiens OX=9606 GN=MRPS9 PE=1 SV=2	1	6	6	6	17.2	45.834	76745000	128030000	60249000	59311000	42635000	55330000	46779000	22693000	35001000	35255000	73394000	39011600	1.88134	-	0.0600673
P28676	GCA	sp|P28676|GRAN_HUMAN Grancalcin OS=Homo sapiens OX=9606 GN=GCA PE=1 SV=2	1	5	5	5	18.4	24.01	108760000	272180000	109540000	85063000	122200000	55158000	114480000	74477000	72598000	54754000	139548600	74293400	1.87834	-	0.102583
Q9Y3A6	TMED5	sp|Q9Y3A6|TMED5_HUMAN Transmembrane emp24 domain-containing protein 5 OS=Homo sapiens OX=9606 GN=TMED5 PE=1 SV=1	1	5	5	5	29.3	26.005	148340000	185000000	93992000	251110000	94656000		119300000	57338000	97127000	55604000	154619600	82342250	1.87777	-	0.086571
P31689	DNAJA1	sp|P31689|DNJA1_HUMAN DnaJ homolog subfamily A member 1 OS=Homo sapiens OX=9606 GN=DNAJA1 PE=1 SV=2	1	12	12	12	34.8	44.868	264810000	265840000	376260000	656490000	237800000	194910000	236290000	188120000	191960000	147960000	360240000	191848000	1.87774	-	0.0657528
Q16543	CDC37	sp|Q16543|CDC37_HUMAN Hsp90 co-chaperone Cdc37 OS=Homo sapiens OX=9606 GN=CDC37 PE=1 SV=1	1	12	12	12	34.7	44.468	484970000	351560000	1229600000	452930000	361430000	329790000	360430000	209050000	437560000	197640000	576098000	306894000	1.87719	-	0.155361
P08637;O75015	FCGR3A	sp|P08637|FCG3A_HUMAN Low affinity immunoglobulin gamma Fc region receptor III-A OS=Homo sapiens OX=9606 GN=FCGR3A PE=1 SV=2	2	5	5	5	21.3	29.089	32821000	91115000	28219000	45073000	36884000	13268000	31036000	26343000	29193000		46822400	24960000	1.8759	-	0.147178
Q9H444	CHMP4B	sp|Q9H444|CHM4B_HUMAN Charged multivesicular body protein 4b OS=Homo sapiens OX=9606 GN=CHMP4B PE=1 SV=1	1	8	8	8	39.3	24.95	304610000	534010000	186540000	311880000	123180000	180610000	233500000	90045000	143160000	131310000	292044000	155725000	1.87538	-	0.103979
P62753	RPS6	sp|P62753|RS6_HUMAN 40S ribosomal protein S6 OS=Homo sapiens OX=9606 GN=RPS6 PE=1 SV=1	1	8	8	8	26.5	28.68	1169500000	1236600000	711680000	1396800000	465420000	599400000	954320000	402470000	515410000	183970000	996000000	531114000	1.8753	-	0.0634306
P84243	H3-3A	sp|P84243|H33_HUMAN Histone H3.3 OS=Homo sapiens OX=9606 GN=H3-3A PE=1 SV=2	1	9	2	2	58.1	15.328	922830000	7427300000	2781600000				473440000		4564500000	912710000	3.71058e+09	1983550000	1.87067	-	0.499494
Q14839;Q8TDI0	CHD4	sp|Q14839|CHD4_HUMAN Chromodomain-helicase-DNA-binding protein 4 OS=Homo sapiens OX=9606 GN=CHD4 PE=1 SV=2	2	29	29	24	19	218	116040000	188900000	141890000	120180000	82905000	65793000	152500000	20051000	86668000	22512000	129983000	69504800	1.87013	-	0.0783496
O43795	MYO1B	sp|O43795|MYO1B_HUMAN Unconventional myosin-Ib OS=Homo sapiens OX=9606 GN=MYO1B PE=1 SV=3	1	32	32	29	34.7	131.98	193450000	74020000	191210000	436030000	130140000	98326000	101840000	90302000	164430000	94409000	204970000	109861400	1.86571	-	0.171646
O43592	XPOT	sp|O43592|XPOT_HUMAN Exportin-T OS=Homo sapiens OX=9606 GN=XPOT PE=1 SV=2	1	10	10	10	14.6	109.96	128280000	88913000	74117000	64990000	45979000	50053000	55352000		44591000	22837000	80455800	43208250	1.86205	-	0.0632424
P60510	PPP4C	sp|P60510|PP4C_HUMAN Serine/threonine-protein phosphatase 4 catalytic subunit OS=Homo sapiens OX=9606 GN=PPP4C PE=1 SV=1	1	4	3	3	20.5	35.08	131970000	146980000	86440000	243740000	80939000	69959000	126390000		66643000	33685000	138013800	74169250	1.8608	-	0.130774
P09486	SPARC	sp|P09486|SPRC_HUMAN SPARC OS=Homo sapiens OX=9606 GN=SPARC PE=1 SV=1	1	7	7	7	26.4	34.632	106930000	79822000	68628000	119170000	31156000	33137000	70707000		33002000	37721000	81141200	43641750	1.85926	-	0.0923195
Q5NDL2	EOGT	sp|Q5NDL2|EOGT_HUMAN EGF domain-specific O-linked N-acetylglucosamine transferase OS=Homo sapiens OX=9606 GN=EOGT PE=1 SV=1	1	5	5	5	10.2	62.01	53358000	18172000	38088000	49155000	17624000	18985000	26613000		11350000		35279400	1.89827e+07	1.85851	-	0.172776
P78318	IGBP1	sp|P78318|IGBP1_HUMAN Immunoglobulin-binding protein 1 OS=Homo sapiens OX=9606 GN=IGBP1 PE=1 SV=1	1	6	6	6	20.1	39.221	22253000	16957000	18275000	47265000	17077000	13886000	15441000		10036000		24365400	13121000	1.85698	-	0.20092
O60306	AQR	sp|O60306|AQR_HUMAN RNA helicase aquarius OS=Homo sapiens OX=9606 GN=AQR PE=1 SV=4	1	22	22	21	17.8	171.29	57744000	109410000	88165000	90544000	24687000	40925000	54749000		50090000	14126000	74110000	39972500	1.85402	-	0.109965
Q9BRR6	ADPGK	sp|Q9BRR6|ADPGK_HUMAN ADP-dependent glucokinase OS=Homo sapiens OX=9606 GN=ADPGK PE=1 SV=1	1	10	10	10	33.8	54.088	89263000	67494000	62223000	159550000	70048000	47979000	77304000	16491000	52077000		89715600	48462750	1.85123	-	0.118768
P11678	EPX	sp|P11678|PERE_HUMAN Eosinophil peroxidase OS=Homo sapiens OX=9606 GN=EPX PE=1 SV=2	1	20	16	16	25.2	81.04	84511000	108900000		1649200	827000000	5758100	526710000		1859000	17994000	255515050	138080275	1.85048	-	0.630111
P30085	CMPK1	sp|P30085|KCY_HUMAN UMP-CMP kinase OS=Homo sapiens OX=9606 GN=CMPK1 PE=1 SV=3	1	11	11	11	60.7	22.222	708950000	509190000	417020000	851260000	250060000	331740000	465490000	234570000	291520000	156080000	547296000	295880000	1.84972	-	0.0658033
Q99598	TSNAX	sp|Q99598|TSNAX_HUMAN Translin-associated protein X OS=Homo sapiens OX=9606 GN=TSNAX PE=1 SV=1	1	5	5	5	21	33.112			224400000	651840000	2727700000	756880000	693640000	598260000	688260000	519290000	1.20131e+09	651266000	1.84458	-	0.369703
Q86VB7	CD163	sp|Q86VB7|C163A_HUMAN Scavenger receptor cysteine-rich type 1 protein M130 OS=Homo sapiens OX=9606 GN=CD163 PE=1 SV=2	1	16	16	16	20.5	125.45	162220000	276000000	73124000	255330000	165150000	68473000	240160000	84913000	82725000	28975000	186364800	101049200	1.8443	-	0.135567
P50416;Q92523	CPT1A	sp|P50416|CPT1A_HUMAN Carnitine O-palmitoyltransferase 1, liver isoform OS=Homo sapiens OX=9606 GN=CPT1A PE=1 SV=2	2	14	14	14	19.1	88.367	38816000	56635000	102810000	139480000	11127000	41376000	43995000	34191000	52709000	17004000	69773600	37855000	1.84318	-	0.215068
Q99439	CNN2	sp|Q99439|CNN2_HUMAN Calponin-2 OS=Homo sapiens OX=9606 GN=CNN2 PE=1 SV=4	1	7	6	6	27.8	33.697	822170000	661820000	462510000	425810000	357960000	325980000	529480000	305820000	146060000	174820000	546054000	296432000	1.84209	-	0.05184
Q9Y3Z3	SAMHD1	sp|Q9Y3Z3|SAMH1_HUMAN Deoxynucleoside triphosphate triphosphohydrolase SAMHD1 OS=Homo sapiens OX=9606 GN=SAMHD1 PE=1 SV=2	1	34	34	34	64.5	72.2	1787900000	1169500000	764990000	798350000	675600000	662320000	1078900000	434190000	325840000	328100000	1039268000	565870000	1.83658	-	0.0945594
P27482	CALML3	sp|P27482|CALL3_HUMAN Calmodulin-like protein 3 OS=Homo sapiens OX=9606 GN=CALML3 PE=1 SV=2	1	16	16	15	79.9	16.891	2708700000	1612500000	273410000	638650000	722430000	977420000	2039800000	124370000	58119000	46611000	1191138000	649264000	1.8346	-	0.382471
O14617	AP3D1	sp|O14617|AP3D1_HUMAN AP-3 complex subunit delta-1 OS=Homo sapiens OX=9606 GN=AP3D1 PE=1 SV=1	1	21	21	21	23.7	130.16	118650000	70924000	68845000	186630000	69608000	54793000	78576000	57362000	60017000	29909000	102931400	56131400	1.83376	-	0.0897107
O75822	EIF3J	sp|O75822|EIF3J_HUMAN Eukaryotic translation initiation factor 3 subunit J OS=Homo sapiens OX=9606 GN=EIF3J PE=1 SV=2	1	6	6	6	17.1	29.062	41913000	109560000	82522000	131610000	64521000		44404000	61531000	34881000		86025200	4.69387e+07	1.83272	-	0.125166
Q15438	CYTH1	sp|Q15438|CYH1_HUMAN Cytohesin-1 OS=Homo sapiens OX=9606 GN=CYTH1 PE=1 SV=1	1	7	7	5	25.6	46.412	43014000	58372000	32156000	40799000	20884000	16106000	34320000		13604000		39045000	2.13433e+07	1.82938	-	0.113133
P18583	SON	sp|P18583|SON_HUMAN Protein SON OS=Homo sapiens OX=9606 GN=SON PE=1 SV=4	1	13	13	13	8.5	263.83	111890000	111160000	116300000	191180000	59615000	36453000	104280000		67963000	49894000	118029000	64647500	1.82573	-	0.0897601
Q15758	SLC1A5	sp|Q15758|AAAT_HUMAN Neutral amino acid transporter B(0) OS=Homo sapiens OX=9606 GN=SLC1A5 PE=1 SV=2	1	10	10	10	20.1	56.598	288240000	350620000	122650000	172230000	51752000	41626000	318880000	28309000	43665000		197098400	108120000	1.82296	-	0.341974
Q12931	TRAP1	sp|Q12931|TRAP1_HUMAN Heat shock protein 75 kDa, mitochondrial OS=Homo sapiens OX=9606 GN=TRAP1 PE=1 SV=3	1	15	15	15	27.3	80.109	170800000	203350000	247470000	222060000	63656000	96258000	193900000	42009000	100430000	65699000	181467200	99659200	1.82088	-	0.0819471
P61353	RPL27	sp|P61353|RL27_HUMAN 60S ribosomal protein L27 OS=Homo sapiens OX=9606 GN=RPL27 PE=1 SV=2	1	7	7	7	48.5	15.798	1576200000	2083900000	1182600000	1814300000	761630000	623670000	1445900000	545420000	916790000	547920000	1483726000	815940000	1.81843	-	0.0501043
Q9GZT3	SLIRP	sp|Q9GZT3|SLIRP_HUMAN SRA stem-loop-interacting RNA-binding protein, mitochondrial OS=Homo sapiens OX=9606 GN=SLIRP PE=1 SV=1	1	7	7	7	67	12.349	95025000	248880000	282640000	270070000	108000000	123050000	163930000	95742000	91686000	78132000	200923000	110508000	1.81818	-	0.0724817
P54819	AK2	sp|P54819|KAD2_HUMAN Adenylate kinase 2, mitochondrial OS=Homo sapiens OX=9606 GN=AK2 PE=1 SV=2	1	10	10	10	52.3	26.477	806480000	589590000	745620000	432840000	395850000	374980000	494270000		316870000	122590000	594076000	327177500	1.81576	-	0.0532548
P62277	RPS13	sp|P62277|RS13_HUMAN 40S ribosomal protein S13 OS=Homo sapiens OX=9606 GN=RPS13 PE=1 SV=2	1	8	8	8	52.3	17.222	2935600000	3083100000	1628300000	2779000000	1525600000	1497600000	2799800000	755680000	1063800000	469850000	2390320000	1317346000	1.8145	-	0.0768018
Q9GZM5	YIPF3	sp|Q9GZM5|YIPF3_HUMAN Protein YIPF3 OS=Homo sapiens OX=9606 GN=YIPF3 PE=1 SV=1	1	3	3	3	7.4	38.247	111740000	95094000	48259000	110380000		40629000	67825000		42757000		91368250	5.04037e+07	1.81273	-	0.0840461
P07237	P4HB	sp|P07237|PDIA1_HUMAN Protein disulfide-isomerase OS=Homo sapiens OX=9606 GN=P4HB PE=1 SV=3	1	33	33	33	62.2	57.116	2853000000	3316200000	2365200000	5683300000	2794100000	1747300000	3147000000	1581500000	1785500000	1124400000	3402360000	1877140000	1.81252	-	0.0551839
Q14696	MESD	sp|Q14696|MESD_HUMAN LRP chaperone MESD OS=Homo sapiens OX=9606 GN=MESD PE=1 SV=2	1	8	8	8	31.6	26.076	383190000	309170000	283920000	623160000	196660000	165110000	275150000	193870000	238950000	118870000	359220000	198390000	1.81068	-	0.0713596
Q9UHB9	SRP68	sp|Q9UHB9|SRP68_HUMAN Signal recognition particle subunit SRP68 OS=Homo sapiens OX=9606 GN=SRP68 PE=1 SV=2	1	16	16	16	27	70.729	388480000	317550000	379680000	818180000	346350000	209560000	335930000	217900000	305300000	174190000	450048000	248576000	1.8105	-	0.0734293
Q9NZ01	TECR	sp|Q9NZ01|TECR_HUMAN Very-long-chain enoyl-CoA reductase OS=Homo sapiens OX=9606 GN=TECR PE=1 SV=1	1	10	10	10	27.3	36.034	340570000	291060000	93748000	278350000	229970000	92954000	218960000	60418000	200250000	108890000	246739600	136294400	1.81034	-	0.0678095
P15309	ACP3	sp|P15309|PPAP_HUMAN Prostatic acid phosphatase OS=Homo sapiens OX=9606 GN=ACP3 PE=1 SV=3	1	7	7	7	18.9	44.566	131700000	346610000			69929000	88543000	152100000		62758000		1.82746e+08	1.01134e+08	1.80698	-	0.405972
P62266	RPS23	sp|P62266|RS23_HUMAN 40S ribosomal protein S23 OS=Homo sapiens OX=9606 GN=RPS23 PE=1 SV=3	1	4	4	4	29.4	15.807	464200000	414400000	396820000	589890000	202220000	189990000	370050000	98911000	256640000		413506000	228897750	1.80651	-	0.0714848
Q9Y5B9	SUPT16H	sp|Q9Y5B9|SP16H_HUMAN FACT complex subunit SPT16 OS=Homo sapiens OX=9606 GN=SUPT16H PE=1 SV=1	1	22	22	22	19	119.91	121600000	106740000	198230000	174210000	78340000	100610000	111660000	35884000	79628000	48395000	135824000	75235400	1.80532	-	0.0511278
O43447	PPIH	sp|O43447|PPIH_HUMAN Peptidyl-prolyl cis-trans isomerase H OS=Homo sapiens OX=9606 GN=PPIH PE=1 SV=1	1	4	4	4	20.3	19.208	124700000	108170000	222520000	222950000	127580000	95282000	147390000	43331000	104320000	57102000	161184000	89485000	1.80124	-	0.051394
P07108	DBI	sp|P07108|ACBP_HUMAN Acyl-CoA-binding protein OS=Homo sapiens OX=9606 GN=DBI PE=1 SV=2	1	5	5	5	70.1	10.044	1318300000	2222200000	817600000	1367600000	916120000	826200000	1150900000	601510000	666930000	450740000	1328364000	739256000	1.79689	-	0.0647934
P80297;P02795;P13640;Q8N339;P80294;P04731	MT1X; MT2A; MT1G	sp|P80297|MT1X_HUMAN Metallothionein-1X OS=Homo sapiens OX=9606 GN=MT1X PE=1 SV=1;sp|P02795|MT2_HUMAN Metallothionein-2 OS=Homo sapiens OX=9606 GN=MT2A PE=1 SV=1;sp|P13640|MT1G_HUMAN Metallothionein-1G OS=Homo sapiens OX=9606 GN=MT1G PE=1 SV=2	6	3	3	2	65.6	6.0683	454530000	297430000	610280000	389570000	434830000	419740000	150920000			160780000	437328000	2.43813e+08	1.7937	-	0.0841578
O00182	LGALS9	sp|O00182|LEG9_HUMAN Galectin-9 OS=Homo sapiens OX=9606 GN=LGALS9 PE=1 SV=2	1	7	7	4	24.8	39.518	176730000	287070000	161050000	243730000	109460000	58477000	197680000		72112000		195608000	109423000	1.78763	-	0.154106
P16435	POR	sp|P16435|NCPR_HUMAN NADPH--cytochrome P450 reductase OS=Homo sapiens OX=9606 GN=POR PE=1 SV=2	1	22	22	22	38.8	76.689	193160000	511110000	131090000	213380000	176260000	131370000	263810000	49946000	159510000	81839000	245000000	137295000	1.78448	-	0.200902
Q9H9B4	SFXN1	sp|Q9H9B4|SFXN1_HUMAN Sideroflexin-1 OS=Homo sapiens OX=9606 GN=SFXN1 PE=1 SV=4	1	10	10	10	35.4	35.619	205900000	285380000	215960000	425870000	91586000	109960000	192030000		109870000		244939200	1.37287e+08	1.78414	-	0.205691
P08069	IGF1R	sp|P08069|IGF1R_HUMAN Insulin-like growth factor 1 receptor OS=Homo sapiens OX=9606 GN=IGF1R PE=1 SV=1	1	13	13	10	11.6	154.79	25959000	26552000	46219000	68409000	16014000	10563000	27827000		23212000		36630600	20534000	1.7839	-	0.261984
Q07020	RPL18	sp|Q07020|RL18_HUMAN 60S ribosomal protein L18 OS=Homo sapiens OX=9606 GN=RPL18 PE=1 SV=2	1	7	7	7	42	21.634	969380000	1179100000	641420000	1087600000	496460000	597400000	870300000	257870000	431690000	296110000	874792000	490674000	1.78284	-	0.0566388
Q92817;A8MZ36	EVPL	sp|Q92817|EVPL_HUMAN Envoplakin OS=Homo sapiens OX=9606 GN=EVPL PE=1 SV=3	2	65	65	65	39.7	231.6	231300000	299890000	7355000	23270000	36694000	2695600	197510000		1490700		119701800	67232100	1.78043	-	0.59653
P31146	CORO1A	sp|P31146|COR1A_HUMAN Coronin-1A OS=Homo sapiens OX=9606 GN=CORO1A PE=1 SV=4	1	15	15	15	31.2	51.026	927930000	1309300000	915060000	827690000	1189400000	652310000	1225200000	423020000	433970000	175940000	1033876000	582088000	1.77615	-	0.053648
P51571	SSR4	sp|P51571|SSRD_HUMAN Translocon-associated protein subunit delta OS=Homo sapiens OX=9606 GN=SSR4 PE=1 SV=1	1	4	4	4	28.9	18.998	664320000	891460000	562810000	1346400000	452500000	312680000	815290000	286570000	521650000	269870000	783498000	441212000	1.77579	-	0.108295
P41227;Q9BSU3	NAA10	sp|P41227|NAA10_HUMAN N-alpha-acetyltransferase 10 OS=Homo sapiens OX=9606 GN=NAA10 PE=1 SV=1	2	9	9	9	37.4	26.458	81001000	65218000	47845000	125070000	45626000	32352000	66223000		45550000	20411000	72952000	41134000	1.77352	-	0.130641
Q9H2M9	RAB3GAP2	sp|Q9H2M9|RBGPR_HUMAN Rab3 GTPase-activating protein non-catalytic subunit OS=Homo sapiens OX=9606 GN=RAB3GAP2 PE=1 SV=1	1	18	18	18	15.2	155.98	77345000	69720000	67015000	146170000	31919000	44605000	53240000	57446000	43087000	22845000	78433800	44244600	1.77273	-	0.119063
Q96EY4	TMA16	sp|Q96EY4|TMA16_HUMAN Translation machinery-associated protein 16 OS=Homo sapiens OX=9606 GN=TMA16 PE=1 SV=2	1	3	3	3	20.7	23.864	47613000	109450000	41746000			28728000	50808000		32736000		6.62697e+07	37424000	1.77078	-	0.272634
O96019;O94805	ACTL6A	sp|O96019|ACL6A_HUMAN Actin-like protein 6A OS=Homo sapiens OX=9606 GN=ACTL6A PE=1 SV=1	2	12	12	12	40.8	47.46	86285000	109890000	80279000	72200000	40063000	58185000	83189000	15888000	41836000	20428000	77743400	43905200	1.77071	-	0.078899
P46781	RPS9	sp|P46781|RS9_HUMAN 40S ribosomal protein S9 OS=Homo sapiens OX=9606 GN=RPS9 PE=1 SV=3	1	16	16	16	57.7	22.591	1773300000	1948800000	1108600000	2066700000	845600000	741860000	1421500000	695020000	1058300000	458190000	1548600000	874974000	1.76988	-	0.0508626
Q14789	GOLGB1	sp|Q14789|GOGB1_HUMAN Golgin subfamily B member 1 OS=Homo sapiens OX=9606 GN=GOLGB1 PE=1 SV=2	1	47	47	47	17.3	376.01	244700000	294360000	267260000	327690000	139270000	55819000	313570000		136000000	70405000	254656000	143948500	1.76908	-	0.124198
P32456	GBP2	sp|P32456|GBP2_HUMAN Guanylate-binding protein 2 OS=Homo sapiens OX=9606 GN=GBP2 PE=1 SV=3	1	22	18	17	31.1	67.208	240440000	280120000	119070000	415780000	119200000	206330000	159900000	58730000	193730000	45727000	234922000	132883400	1.76788	-	0.155134
Q00653	NFKB2	sp|Q00653|NFKB2_HUMAN Nuclear factor NF-kappa-B p100 subunit OS=Homo sapiens OX=9606 GN=NFKB2 PE=1 SV=4	1	12	12	11	16.7	96.748	58555000	86714000	85039000	161430000	64807000	60745000	60053000	41921000	43954000		91309000	51668250	1.76722	-	0.105095
Q9UKV3	ACIN1	sp|Q9UKV3|ACINU_HUMAN Apoptotic chromatin condensation inducer in the nucleus OS=Homo sapiens OX=9606 GN=ACIN1 PE=1 SV=2	1	18	18	18	16	151.86	263890000	173870000	291850000	297110000	98724000	112970000	151120000		118250000		225088800	1.27447e+08	1.76614	-	0.110321
Q14CX7	NAA25	sp|Q14CX7|NAA25_HUMAN N-alpha-acetyltransferase 25, NatB auxiliary subunit OS=Homo sapiens OX=9606 GN=NAA25 PE=1 SV=1	1	11	11	11	12.7	112.29	79941000	83872000	47545000	74864000	26334000	38849000	54602000	39322000	27631000	16593000	62511200	35399400	1.76588	-	0.0663045
Q9H299	SH3BGRL3	sp|Q9H299|SH3L3_HUMAN SH3 domain-binding glutamic acid-rich-like protein 3 OS=Homo sapiens OX=9606 GN=SH3BGRL3 PE=1 SV=1	1	5	5	5	40.9	10.438	1134700000	929020000	375950000	924470000	754680000	215150000	888510000		372090000	391790000	823764000	466885000	1.76438	-	0.106792
O15231	ZNF185	sp|O15231|ZN185_HUMAN Zinc finger protein 185 OS=Homo sapiens OX=9606 GN=ZNF185 PE=1 SV=3	1	25	25	25	40.2	73.525	559270000	262950000	171420000	246010000	183800000	228990000	210220000	195360000	65084000	107180000	284690000	161366800	1.76424	-	0.151058
P02675;CON__P02676	FGB	sp|P02675|FIBB_HUMAN Fibrinogen beta chain OS=Homo sapiens OX=9606 GN=FGB PE=1 SV=2	2	34	34	34	65.8	55.928	773730000	14442000000	7728300000	2674400000	3551000000	2073000000	1940400000	4506600000	2715300000	5298600000	5833886000	3306780000	1.76422	-	0.34643
P49915	GMPS	sp|P49915|GUAA_HUMAN GMP synthase [glutamine-hydrolyzing] OS=Homo sapiens OX=9606 GN=GMPS PE=1 SV=1	1	20	20	20	35.5	76.715	233780000	448060000	234770000	340280000	118490000	182500000	290620000	120650000	118440000	68125000	275076000	156067000	1.76255	-	0.11608
P20292	ALOX5AP	sp|P20292|AL5AP_HUMAN Arachidonate 5-lipoxygenase-activating protein OS=Homo sapiens OX=9606 GN=ALOX5AP PE=1 SV=2	1	3	3	3	17.4	18.157	249140000	563560000	342840000	257710000	251770000	82894000	363140000	158050000	184150000	156720000	333004000	188990800	1.76201	-	0.0954734
Q9NP72	RAB18	sp|Q9NP72|RAB18_HUMAN Ras-related protein Rab-18 OS=Homo sapiens OX=9606 GN=RAB18 PE=1 SV=1	1	9	9	9	49	22.977	211510000	177000000	273820000	570800000	227670000	221720000	186610000	113030000	166730000	141470000	292160000	165912000	1.76093	-	0.125373
Q8WWM7	ATXN2L	sp|Q8WWM7|ATX2L_HUMAN Ataxin-2-like protein OS=Homo sapiens OX=9606 GN=ATXN2L PE=1 SV=2	1	7	7	7	7.2	113.37	37073000	63208000	66113000	116570000	33431000	34078000	52825000			21147000	63279000	3.60167e+07	1.75694	-	0.24069
Q6ZN66	GBP6	sp|Q6ZN66|GBP6_HUMAN Guanylate-binding protein 6 OS=Homo sapiens OX=9606 GN=GBP6 PE=2 SV=1	1	22	22	19	46.4	72.426	225060000	248590000	28574000	271790000	176550000	74204000	289340000		28158000	41464000	190112800	108291500	1.75557	-	0.298045
Q9Y6K9	IKBKG	sp|Q9Y6K9|NEMO_HUMAN NF-kappa-B essential modulator OS=Homo sapiens OX=9606 GN=IKBKG PE=1 SV=2	1	7	7	7	20.3	48.197	41293000	43880000	49390000	66530000	20678000	27197000	30593000		18018000		44354200	2.52693e+07	1.75526	-	0.110696
Q9UBC9	SPRR3	sp|Q9UBC9|SPRR3_HUMAN Small proline-rich protein 3 OS=Homo sapiens OX=9606 GN=SPRR3 PE=1 SV=2	1	11	11	11	76.3	18.154	2298400000	4875000000	75839000	57966000	17877000000	2076400000	9836500000	152670000	102030000	2214400000	5036841000	2876400000	1.75109	-	0.583756
Q08378	GOLGA3	sp|Q08378|GOGA3_HUMAN Golgin subfamily A member 3 OS=Homo sapiens OX=9606 GN=GOLGA3 PE=1 SV=2	1	17	17	17	13	167.35	62974000	98246000	74281000	108890000	62224000	22377000	82425000	33057000	48024000		81323000	46470750	1.74998	-	0.0623805
Q9BYD1	MRPL13	sp|Q9BYD1|RM13_HUMAN 39S ribosomal protein L13, mitochondrial OS=Homo sapiens OX=9606 GN=MRPL13 PE=1 SV=1	1	6	6	6	35.4	20.692	27446000	62036000	22181000	43429000	16880000	12635000	29173000		17166000		34394400	19658000	1.74964	-	0.248484
Q32P28;Q8IVL5	P3H1	sp|Q32P28|P3H1_HUMAN Prolyl 3-hydroxylase 1 OS=Homo sapiens OX=9606 GN=P3H1 PE=1 SV=2	2	13	13	13	23	83.393	77227000	66216000	94004000	129510000	46523000	32312000	103050000	46733000	26172000	28341000	82696000	47321600	1.74753	-	0.11623
Q9ULZ3	PYCARD	sp|Q9ULZ3|ASC_HUMAN Apoptosis-associated speck-like protein containing a CARD OS=Homo sapiens OX=9606 GN=PYCARD PE=1 SV=2	1	8	8	8	34.4	21.627	210090000	394610000	134520000	523790000	263420000	185500000	281550000	107270000	196960000	102730000	305286000	174802000	1.74647	-	0.127033
P52209	PGD	sp|P52209|6PGD_HUMAN 6-phosphogluconate dehydrogenase, decarboxylating OS=Homo sapiens OX=9606 GN=PGD PE=1 SV=3	1	22	22	22	51.6	53.139	1069400000	2173400000	841460000	1354000000	950710000	759900000	1643600000	435940000	591340000	230320000	1277794000	732220000	1.7451	-	0.14935
O75608	LYPLA1	sp|O75608|LYPA1_HUMAN Acyl-protein thioesterase 1 OS=Homo sapiens OX=9606 GN=LYPLA1 PE=1 SV=1	1	4	4	4	21.7	24.669	253910000	223590000	172720000	271910000	130620000	123140000	202380000		106230000	50877000	210550000	120656750	1.74503	-	0.0614474
O75153	CLUH	sp|O75153|CLU_HUMAN Clustered mitochondria protein homolog OS=Homo sapiens OX=9606 GN=CLUH PE=1 SV=2	1	16	16	15	14.1	146.67	26783000	76184000	35881000	53508000	18846000	6582700	61471000		4595500		42240400	24216400	1.74429	-	0.386357
P53634	CTSC	sp|P53634|CATC_HUMAN Dipeptidyl peptidase 1 OS=Homo sapiens OX=9606 GN=CTSC PE=1 SV=2	1	6	6	6	21.6	51.853	98950000	79757000	37697000	120970000	123630000	48063000	110850000		31717000	20969000	92200800	52899750	1.74293	-	0.162052
P28838	LAP3	sp|P28838|AMPL_HUMAN Cytosol aminopeptidase OS=Homo sapiens OX=9606 GN=LAP3 PE=1 SV=3	1	25	25	25	55.5	56.166	972530000	915690000	514750000	1138000000	582390000	661510000	717950000	345290000	437850000	205070000	824672000	473534000	1.74153	-	0.050818
O60437	PPL	sp|O60437|PEPL_HUMAN Periplakin OS=Homo sapiens OX=9606 GN=PPL PE=1 SV=4	1	87	87	87	52.2	204.74	1508100000	1063500000	178310000	131140000	677470000	191170000	1298100000	70633000	347460000	136450000	711704000	408762600	1.74112	-	0.408372
Q9BZF1;Q9H0X9	OSBPL8	sp|Q9BZF1|OSBL8_HUMAN Oxysterol-binding protein-related protein 8 OS=Homo sapiens OX=9606 GN=OSBPL8 PE=1 SV=3	2	12	12	12	19	101.19	143000000	103640000	62447000	82518000	79546000	37415000	102500000	37206000	67403000	26427000	94230200	54190200	1.73888	-	0.0752751
P08174	CD55	sp|P08174|DAF_HUMAN Complement decay-accelerating factor OS=Homo sapiens OX=9606 GN=CD55 PE=1 SV=4	1	9	9	9	28.9	41.4	118880000	110260000	86191000	465330000	118620000	96706000	85845000	59161000	186280000	90401000	179856200	103678600	1.73475	-	0.338342
Q9UHL4	DPP7	sp|Q9UHL4|DPP2_HUMAN Dipeptidyl peptidase 2 OS=Homo sapiens OX=9606 GN=DPP7 PE=1 SV=3	1	7	7	7	17.5	54.341	75100000	72243000	52506000	58894000	126170000	39165000	52540000	28985000	38332000	62879000	76982600	44380200	1.73462	-	0.0518876
P22570	FDXR	sp|P22570|ADRO_HUMAN NADPH:adrenodoxin oxidoreductase, mitochondrial OS=Homo sapiens OX=9606 GN=FDXR PE=1 SV=3	1	16	16	16	32.4	53.836	143850000	168330000	83165000	156890000	75171000	89425000	117750000	23277000	75043000	56231000	125481200	72345200	1.73448	-	0.0663465
O43252	PAPSS1	sp|O43252|PAPS1_HUMAN Bifunctional 3-phosphoadenosine 5-phosphosulfate synthase 1 OS=Homo sapiens OX=9606 GN=PAPSS1 PE=1 SV=2	1	7	7	7	16.2	70.832	57297000	97022000	59768000	73970000	41191000	33852000	54396000	25735000			65849600	3.79943e+07	1.73314	-	0.0930154
P36578	RPL4	sp|P36578|RL4_HUMAN 60S ribosomal protein L4 OS=Homo sapiens OX=9606 GN=RPL4 PE=1 SV=5	1	16	16	16	37.9	47.697	1418200000	1703200000	783110000	1630000000	811140000	703820000	1255800000	403930000	860850000	437540000	1269130000	732388000	1.73287	-	0.0660456
Q9UKK3	PARP4	sp|Q9UKK3|PARP4_HUMAN Protein mono-ADP-ribosyltransferase PARP4 OS=Homo sapiens OX=9606 GN=PARP4 PE=1 SV=3	1	14	14	14	9.3	192.59	142730000	106580000	107510000	106970000	113160000	31220000	146820000		59816000	28856000	115390000	66678000	1.73056	-	0.0977949
Q12792	TWF1	sp|Q12792|TWF1_HUMAN Twinfilin-1 OS=Homo sapiens OX=9606 GN=TWF1 PE=1 SV=3	1	17	17	14	50.3	40.282	826720000	478600000	398620000	378680000	395550000	296060000	419850000	290950000	228180000	198850000	495634000	286778000	1.72828	-	0.0543797
P45973	CBX5	sp|P45973|CBX5_HUMAN Chromobox protein homolog 5 OS=Homo sapiens OX=9606 GN=CBX5 PE=1 SV=1	1	9	9	8	60.2	22.225	133840000	85648000	324200000	184990000	85250000	147870000	107360000	49779000	94374000	72014000	162785600	94279400	1.72663	-	0.186085
P62280	RPS11	sp|P62280|RS11_HUMAN 40S ribosomal protein S11 OS=Homo sapiens OX=9606 GN=RPS11 PE=1 SV=3	1	12	12	12	53.2	18.431	943300000	1118900000	605360000	1096800000	490130000	605770000	922420000	258150000	484390000	194740000	850898000	493094000	1.72563	-	0.0868392
Q9HB71	CACYBP	sp|Q9HB71|CYBP_HUMAN Calcyclin-binding protein OS=Homo sapiens OX=9606 GN=CACYBP PE=1 SV=2	1	11	11	11	61.4	26.21	375520000	867410000	374710000	1179800000	228070000	321180000	394530000		391670000	296900000	605102000	351070000	1.72359	-	0.255433
Q9BYJ9;Q7Z739	YTHDF1; YTHDF3	sp|Q9BYJ9|YTHD1_HUMAN YTH domain-containing family protein 1 OS=Homo sapiens OX=9606 GN=YTHDF1 PE=1 SV=1;sp|Q7Z739|YTHD3_HUMAN YTH domain-containing family protein 3 OS=Homo sapiens OX=9606 GN=YTHDF3 PE=1 SV=1	2	4	4	2	7.9	60.873	104330000	155660000	62252000	208050000	119370000	77770000	110840000		56211000	56822000	129932400	75410750	1.723	-	0.112921
Q08J23	NSUN2	sp|Q08J23|NSUN2_HUMAN RNA cytosine C(5)-methyltransferase NSUN2 OS=Homo sapiens OX=9606 GN=NSUN2 PE=1 SV=2	1	17	17	17	26.6	86.47	49633000	69466000	51257000	103000000	34385000	26901000	44510000		35795000		61548200	3.57353e+07	1.72233	-	0.160331
Q9H4A3;Q96J92;Q9BYP7	WNK1	sp|Q9H4A3|WNK1_HUMAN Serine/threonine-protein kinase WNK1 OS=Homo sapiens OX=9606 GN=WNK1 PE=1 SV=2	3	14	14	12	7.5	250.79	71941000	112510000	54906000	71873000	51430000	39374000	54378000		32603000		72532000	4.21183e+07	1.7221	-	0.0925164
P30520	ADSS2	sp|P30520|PURA2_HUMAN Adenylosuccinate synthetase isozyme 2 OS=Homo sapiens OX=9606 GN=ADSS2 PE=1 SV=3	1	9	9	9	25.9	50.097	189430000	246120000	124130000	343860000	126580000	135650000	188040000	38030000	117410000		206024000	119782500	1.71998	-	0.154829
O95466	FMNL1	sp|O95466|FMNL1_HUMAN Formin-like protein 1 OS=Homo sapiens OX=9606 GN=FMNL1 PE=1 SV=3	1	13	13	11	12.3	121.85	48624000	67259000	53539000	103670000	41804000	24519000	63760000		9512800	48765000	62979200	36639200	1.7189	-	0.152251
Q92888	ARHGEF1	sp|Q92888|ARHG1_HUMAN Rho guanine nucleotide exchange factor 1 OS=Homo sapiens OX=9606 GN=ARHGEF1 PE=1 SV=2	1	21	21	21	28.4	102.43	73130000	73209000	68581000	89883000	54723000	60401000	79938000	21835000	31329000	15724000	71905200	41845400	1.71835	-	0.0559552
P51965;Q96LR5;Q969T4	UBE2E1; UBE2E2	sp|P51965|UB2E1_HUMAN Ubiquitin-conjugating enzyme E2 E1 OS=Homo sapiens OX=9606 GN=UBE2E1 PE=1 SV=1;sp|Q96LR5|UB2E2_HUMAN Ubiquitin-conjugating enzyme E2 E2 OS=Homo sapiens OX=9606 GN=UBE2E2 PE=1 SV=1;sp|Q969T4|UB2E3_HUMAN Ubiquitin-conjugating enzyme E2	3	3	3	3	19.2	21.404	62544000		62164000	31096000			30034000		36714000	23926000	5.19347e+07	3.02247e+07	1.71829	-	0.121022
Q9BXJ9	NAA15	sp|Q9BXJ9|NAA15_HUMAN N-alpha-acetyltransferase 15, NatA auxiliary subunit OS=Homo sapiens OX=9606 GN=NAA15 PE=1 SV=1	1	18	18	14	21.1	101.27	174970000	251080000	120950000	267760000	140970000	96430000	194450000	70660000	92830000	103400000	191146000	111554000	1.71348	-	0.0596949
O60488	ACSL4	sp|O60488|ACSL4_HUMAN Long-chain-fatty-acid--CoA ligase 4 OS=Homo sapiens OX=9606 GN=ACSL4 PE=1 SV=2	1	10	10	10	19.1	79.187	62109000	58888000	67305000	190940000	71654000	23783000	66516000		64731000	55504000	90179200	52633500	1.71334	-	0.250421
Q14C86	GAPVD1	sp|Q14C86|GAPD1_HUMAN GTPase-activating protein and VPS9 domain-containing protein 1 OS=Homo sapiens OX=9606 GN=GAPVD1 PE=1 SV=2	1	15	15	15	12.2	164.98	36007000	74079000	35373000	85517000	15298000	30111000	51212000	17724000	15945000		49254800	28748000	1.71333	-	0.25442
Q9Y3B4	SF3B6	sp|Q9Y3B4|SF3B6_HUMAN Splicing factor 3B subunit 6 OS=Homo sapiens OX=9606 GN=SF3B6 PE=1 SV=1	1	5	5	5	44	14.585	295970000	150810000	156290000	262890000	128680000	87219000	212880000		107200000	57150000	198928000	116112250	1.71324	-	0.130321
P49406	MRPL19	sp|P49406|RM19_HUMAN 39S ribosomal protein L19, mitochondrial OS=Homo sapiens OX=9606 GN=MRPL19 PE=1 SV=2	1	8	8	8	28.8	33.535	31502000	75978000	44414000	65536000		28528000	51866000	15717000	31044000		54357500	31788750	1.70996	-	0.121933
Q8WXH0	SYNE2	sp|Q8WXH0|SYNE2_HUMAN Nesprin-2 OS=Homo sapiens OX=9606 GN=SYNE2 PE=1 SV=3	1	95	95	94	16.5	796.43	1003200000	545180000	506500000	734890000	321680000	427310000	743550000	74068000	434250000	140740000	622290000	363983600	1.70966	-	0.159392
P10606	COX5B	sp|P10606|COX5B_HUMAN Cytochrome c oxidase subunit 5B, mitochondrial OS=Homo sapiens OX=9606 GN=COX5B PE=1 SV=2	1	4	4	4	25.6	13.696	709930000	1170800000	931550000	1273600000	533140000	425960000	888310000		397610000	451210000	923804000	540772500	1.7083	-	0.0797979
Q6P9B6	MEAK7	sp|Q6P9B6|MEAK7_HUMAN MTOR-associated protein MEAK7 OS=Homo sapiens OX=9606 GN=MEAK7 PE=1 SV=2	1	8	8	8	26.5	50.993	179080000	130400000	52108000	73433000	31415000	81012000	101500000	17369000	39044000	34205000	93287200	54626000	1.70774	-	0.251843
P09874	PARP1	sp|P09874|PARP1_HUMAN Poly [ADP-ribose] polymerase 1 OS=Homo sapiens OX=9606 GN=PARP1 PE=1 SV=4	1	42	42	42	42	113.08	389280000	663150000	609830000	606680000	286440000	334760000	527800000	170820000	281700000	182350000	511076000	299486000	1.70651	-	0.062438
Q7Z2K6	ERMP1	sp|Q7Z2K6|ERMP1_HUMAN Endoplasmic reticulum metallopeptidase 1 OS=Homo sapiens OX=9606 GN=ERMP1 PE=1 SV=2	1	16	16	16	24.9	100.23	357100000	597810000	206440000	205950000	126240000	73415000	498880000	37496000	222050000	44173000	298708000	175202800	1.70493	-	0.337552
Q5VW32	BROX	sp|Q5VW32|BROX_HUMAN BRO1 domain-containing protein BROX OS=Homo sapiens OX=9606 GN=BROX PE=1 SV=1	1	7	7	7	21.9	46.476	149520000	142470000	102130000	251980000	51420000	105710000	102510000	91536000	48528000	61768000	139504000	82010400	1.70105	-	0.139209
P12268	IMPDH2	sp|P12268|IMDH2_HUMAN Inosine-5-monophosphate dehydrogenase 2 OS=Homo sapiens OX=9606 GN=IMPDH2 PE=1 SV=2	1	17	17	16	45.7	55.804	603390000	365400000	235280000	179030000	183990000	142410000	300520000	247710000	132260000	98701000	313418000	184320200	1.7004	-	0.183223
Q86X55	CARM1	sp|Q86X55|CARM1_HUMAN Histone-arginine methyltransferase CARM1 OS=Homo sapiens OX=9606 GN=CARM1 PE=1 SV=3	1	10	10	10	18.8	65.853	176220000	128090000	439400000	209850000	147360000	139830000	130980000	159040000	127690000	91032000	220184000	129714400	1.69745	-	0.154875
P14314	PRKCSH	sp|P14314|GLU2B_HUMAN Glucosidase 2 subunit beta OS=Homo sapiens OX=9606 GN=PRKCSH PE=1 SV=2	1	20	20	20	46.6	59.425	1114800000	652030000	2361500000	1079000000	799940000	844600000	647580000	743070000	835940000	471480000	1201454000	708534000	1.69569	-	0.150962
O60869	EDF1	sp|O60869|EDF1_HUMAN Endothelial differentiation-related factor 1 OS=Homo sapiens OX=9606 GN=EDF1 PE=1 SV=1	1	3	3	3	21.6	16.368	269480000	464960000	191730000	441590000	97198000	131210000	169210000		178110000	212940000	292991600	172867500	1.69489	-	0.185586
Q13459	MYO9B	sp|Q13459|MYO9B_HUMAN Unconventional myosin-IXb OS=Homo sapiens OX=9606 GN=MYO9B PE=1 SV=3	1	13	13	11	6.4	243.4	65408000	31758000	29006000	38505000		19309000	28330000		25280000		41169250	2.43063e+07	1.69377	-	0.155652
P43487	RANBP1	sp|P43487|RANG_HUMAN Ran-specific GTPase-activating protein OS=Homo sapiens OX=9606 GN=RANBP1 PE=1 SV=1	1	4	4	4	31.8	23.31	201290000	162650000	311710000	437590000	196400000	151290000	102640000		215050000	149920000	261928000	154725000	1.69286	-	0.121358
P24557	TBXAS1	sp|P24557|THAS_HUMAN Thromboxane-A synthase OS=Homo sapiens OX=9606 GN=TBXAS1 PE=1 SV=3	1	9	9	9	19.5	60.518	87196000	61035000	65903000	43264000	54061000	16718000	79068000		33078000	18393000	62291800	36814250	1.69206	-	0.138228
P83731	RPL24	sp|P83731|RL24_HUMAN 60S ribosomal protein L24 OS=Homo sapiens OX=9606 GN=RPL24 PE=1 SV=1	1	7	7	7	35.7	17.779	874750000	907260000	452030000	960270000	348940000	498820000	651960000	248830000	532570000	162210000	708650000	418878000	1.69178	-	0.10246
P46379	BAG6	sp|P46379|BAG6_HUMAN Large proline-rich protein BAG6 OS=Homo sapiens OX=9606 GN=BAG6 PE=1 SV=2	1	15	15	15	15.6	119.41	62407000	73755000	76970000	143330000	39442000	49068000	74334000	21230000	55924000	33643000	79180800	46839800	1.69046	-	0.137545
O76003	GLRX3	sp|O76003|GLRX3_HUMAN Glutaredoxin-3 OS=Homo sapiens OX=9606 GN=GLRX3 PE=1 SV=2	1	10	10	10	34.3	37.432	98785000	159830000	113110000	209240000	100940000	100390000	141550000	59633000	59496000	42694000	136381000	80752600	1.68887	-	0.0807182
P62847	RPS24	sp|P62847|RS24_HUMAN 40S ribosomal protein S24 OS=Homo sapiens OX=9606 GN=RPS24 PE=1 SV=1	1	5	5	5	35.3	15.423	453450000	642890000	333260000	546430000	161610000	291460000	431710000	168440000	284860000	89322000	427528000	253158400	1.68878	-	0.126576
Q9H0A0	NAT10	sp|Q9H0A0|NAT10_HUMAN RNA cytidine acetyltransferase OS=Homo sapiens OX=9606 GN=NAT10 PE=1 SV=2	1	14	14	14	13.4	115.73	67474000	104050000	130640000	100350000	48037000	46547000	69236000		44331000		90110200	5.33713e+07	1.68836	-	0.119279
Q8N766	EMC1	sp|Q8N766|EMC1_HUMAN ER membrane protein complex subunit 1 OS=Homo sapiens OX=9606 GN=EMC1 PE=1 SV=1	1	18	18	18	24.1	111.76	79305000	51412000	59250000	84650000	42417000	42804000	65816000	21603000	30967000	26680000	63406800	37574000	1.68752	-	0.0513742
Q15397	PUM3	sp|Q15397|PUM3_HUMAN Pumilio homolog 3 OS=Homo sapiens OX=9606 GN=PUM3 PE=1 SV=3	1	7	7	7	12.3	73.584	39519000	47494000	48994000	84357000		36706000	27752000		33490000		55091000	3.26493e+07	1.68735	-	0.120478
O60841	EIF5B	sp|O60841|IF2P_HUMAN Eukaryotic translation initiation factor 5B OS=Homo sapiens OX=9606 GN=EIF5B PE=1 SV=4	1	17	17	17	17.4	138.83	185130000	187880000	208390000	367700000	165810000	138180000	179200000	144180000	133350000	67274000	222982000	132436800	1.68369	-	0.0584466
Q92608	DOCK2	sp|Q92608|DOCK2_HUMAN Dedicator of cytokinesis protein 2 OS=Homo sapiens OX=9606 GN=DOCK2 PE=1 SV=2	1	15	15	15	9.7	211.95	59299000	74879000	45169000	30542000	47012000	22166000	74102000	13279000	12579000		51380200	30531500	1.68286	-	0.218208
Q7Z2W4	ZC3HAV1	sp|Q7Z2W4|ZCCHV_HUMAN Zinc finger CCCH-type antiviral protein 1 OS=Homo sapiens OX=9606 GN=ZC3HAV1 PE=1 SV=3	1	16	16	15	20.2	101.43	123930000	81483000	62716000	126170000	64216000	62726000	84574000	60848000	32136000	32798000	91703000	54616400	1.67904	-	0.0630451
Q96PK6	RBM14	sp|Q96PK6|RBM14_HUMAN RNA-binding protein 14 OS=Homo sapiens OX=9606 GN=RBM14 PE=1 SV=2	1	13	13	13	20.5	69.491	155300000	206330000	195720000	282920000	64551000	129910000	131230000	78136000	106180000	94789000	180964200	108049000	1.67483	-	0.0850812
P61086	UBE2K	sp|P61086|UBE2K_HUMAN Ubiquitin-conjugating enzyme E2 K OS=Homo sapiens OX=9606 GN=UBE2K PE=1 SV=3	1	8	8	8	42.5	22.406	156510000	173420000	67488000	112540000	116270000	69406000	80439000		74719000		125245600	7.48547e+07	1.67318	-	0.0887529
P11117	ACP2	sp|P11117|PPAL_HUMAN Lysosomal acid phosphatase OS=Homo sapiens OX=9606 GN=ACP2 PE=1 SV=3	1	4	4	4	10.4	48.344	38863000	43796000	47024000	61952000	29250000	14741000	54987000	19950000		15987000	44177000	26416250	1.67234	-	0.131043
O14745	NHERF1	sp|O14745|NHRF1_HUMAN Na(+)/H(+) exchange regulatory cofactor NHE-RF1 OS=Homo sapiens OX=9606 GN=NHERF1 PE=1 SV=4	1	12	12	12	38.3	38.868	310790000	286040000	85707000	225000000	298110000	137100000	223040000	96186000	120430000		241129400	144189000	1.67231	-	0.110007
Q9UKD2	MRTO4	sp|Q9UKD2|MRT4_HUMAN mRNA turnover protein 4 homolog OS=Homo sapiens OX=9606 GN=MRTO4 PE=1 SV=2	1	11	11	11	53.1	27.56	106830000	205290000	215710000	191690000	89418000	80245000	171690000		76841000	58275000	161787600	96762750	1.672	-	0.125356
O75351	VPS4B	sp|O75351|VPS4B_HUMAN Vacuolar protein sorting-associated protein 4B OS=Homo sapiens OX=9606 GN=VPS4B PE=1 SV=2	1	11	11	11	28.6	49.301	255240000	166950000	136650000	81648000	96965000	67770000	130290000	77739000	102060000	63324000	147490600	88236600	1.67154	-	0.11254
Q93008;O00507	USP9X	sp|Q93008|USP9X_HUMAN Probable ubiquitin carboxyl-terminal hydrolase FAF-X OS=Homo sapiens OX=9606 GN=USP9X PE=1 SV=4	2	44	44	44	20.2	290.46	167640000	236840000	113390000	186770000	89582000	86928000	194690000	92733000	62774000	38733000	158844400	95171600	1.66903	-	0.127317
P60468	SEC61B	sp|P60468|SC61B_HUMAN Protein transport protein Sec61 subunit beta OS=Homo sapiens OX=9606 GN=SEC61B PE=1 SV=2	1	3	3	3	37.5	9.9743	439760000	601140000	688520000	967680000	285430000	382840000	426740000	306710000		313710000	596506000	357500000	1.66855	-	0.116687
Q02878	RPL6	sp|Q02878|RL6_HUMAN 60S ribosomal protein L6 OS=Homo sapiens OX=9606 GN=RPL6 PE=1 SV=3	1	13	13	13	31.6	32.728	1977100000	2802800000	1613900000	2293900000	1509600000	1274100000	2182500000	754830000	1340100000	562670000	2039460000	1222840000	1.66781	-	0.0571501
Q86V81	ALYREF	sp|Q86V81|THOC4_HUMAN THO complex subunit 4 OS=Homo sapiens OX=9606 GN=ALYREF PE=1 SV=3	1	5	5	5	26.1	26.888	724820000	928680000	496260000	1120000000	510370000	457220000	434510000		478740000	445660000	756026000	454032500	1.66514	-	0.0633937
P11172	UMPS	sp|P11172|UMPS_HUMAN Uridine 5-monophosphate synthase OS=Homo sapiens OX=9606 GN=UMPS PE=1 SV=1	1	14	14	14	36.7	52.221	78729000	130020000	85521000	86322000	48324000	59943000	75495000	41922000	56120000	24780000	85783200	51652000	1.66079	-	0.0604755
P30519	HMOX2	sp|P30519|HMOX2_HUMAN Heme oxygenase 2 OS=Homo sapiens OX=9606 GN=HMOX2 PE=1 SV=2	1	7	7	7	32	36.032	133610000	87780000	67937000	187300000	100080000	82335000	83794000	50175000	61606000		115341400	69477500	1.66013	-	0.106703
P24821	TNC	sp|P24821|TENA_HUMAN Tenascin OS=Homo sapiens OX=9606 GN=TNC PE=1 SV=3	1	54	54	54	33.9	240.85	377480000	661780000	1433000000	825760000	410430000	411570000	562990000	548270000	211560000	502170000	741690000	447312000	1.6581	-	0.183398
Q9Y266	NUDC	sp|Q9Y266|NUDC_HUMAN Nuclear migration protein nudC OS=Homo sapiens OX=9606 GN=NUDC PE=1 SV=1	1	11	11	11	37.8	38.242	226520000	411870000	264790000	422420000	191070000	231970000	251290000	127620000	162740000	141820000	303334000	183088000	1.65677	-	0.0563541
P46779	RPL28	sp|P46779|RL28_HUMAN 60S ribosomal protein L28 OS=Homo sapiens OX=9606 GN=RPL28 PE=1 SV=3	1	7	7	7	40.1	15.747	1209700000	1325300000	588230000	1437500000	511480000	710640000	1134500000	282910000	675360000	259080000	1014442000	612498000	1.65624	-	0.149079
P23368	ME2	sp|P23368|MAOM_HUMAN NAD-dependent malic enzyme, mitochondrial OS=Homo sapiens OX=9606 GN=ME2 PE=1 SV=1	1	17	17	16	30.8	65.443	299030000	226820000	172820000	178570000	103100000	109310000	173680000	104490000	118060000	86447000	196068000	118397400	1.65602	-	0.0608688
P82979	SARNP	sp|P82979|SARNP_HUMAN SAP domain-containing ribonucleoprotein OS=Homo sapiens OX=9606 GN=SARNP PE=1 SV=3	1	2	2	2	9.5	23.671	240170000	149360000	95862000	143090000		132350000	54825000			97501000	157120500	94892000	1.65578	-	0.183228
P04080	CSTB	sp|P04080|CYTB_HUMAN Cystatin-B OS=Homo sapiens OX=9606 GN=CSTB PE=1 SV=2	1	5	5	5	70.4	11.139	7043200000	3246400000	1466200000	891410000	3330700000	2981400000	3037400000	830770000	1849700000	972260000	3195582000	1934306000	1.65206	-	0.314193
Q9Y606	PUS1	sp|Q9Y606|PUS1_HUMAN Pseudouridylate synthase 1 homolog OS=Homo sapiens OX=9606 GN=PUS1 PE=1 SV=3	1	6	6	6	17.1	47.47	51222000	61156000	61217000	71274000	22400000	28156000	42428000		23954000	34902000	53453800	32360000	1.65185	-	0.0762911
Q15042	RAB3GAP1	sp|Q15042|RB3GP_HUMAN Rab3 GTPase-activating protein catalytic subunit OS=Homo sapiens OX=9606 GN=RAB3GAP1 PE=1 SV=3	1	20	20	20	24.9	110.52	93906000	88528000	63118000	116190000	47293000	49031000	61349000		43888000	44103000	81807000	49592750	1.64958	-	0.0569457
Q9Y3E5	PTRH2	sp|Q9Y3E5|PTH2_HUMAN Peptidyl-tRNA hydrolase 2, mitochondrial OS=Homo sapiens OX=9606 GN=PTRH2 PE=1 SV=1	1	5	5	5	47.5	19.193	133660000	196750000	127810000	429040000	110750000	118810000	162950000	91410000	144170000	88883000	199602000	121244600	1.64628	-	0.234422
P04181	OAT	sp|P04181|OAT_HUMAN Ornithine aminotransferase, mitochondrial OS=Homo sapiens OX=9606 GN=OAT PE=1 SV=1	1	11	11	11	41.2	48.534	71680000	207970000	557200000	98348000	111110000	68708000	199860000	31689000	120460000	215230000	209261600	127189400	1.64528	-	0.421327
P18754	RCC1	sp|P18754|RCC1_HUMAN Regulator of chromosome condensation OS=Homo sapiens OX=9606 GN=RCC1 PE=1 SV=1	1	13	13	13	46.1	44.969	169310000	380680000	224060000	326650000	115040000	141140000	253440000	46157000	150660000		243148000	147849250	1.64457	-	0.197432
P02671;CON__P02672	FGA	sp|P02671|FIBA_HUMAN Fibrinogen alpha chain OS=Homo sapiens OX=9606 GN=FGA PE=1 SV=2	2	34	34	34	39.8	94.972	819250000	12245000000	6721800000	2520400000	3030900000	1843500000	1622800000	5722300000	2776400000	3450700000	5067470000	3083140000	1.64361	-	0.386308
P13796	LCP1	sp|P13796|PLSL_HUMAN Plastin-2 OS=Homo sapiens OX=9606 GN=LCP1 PE=1 SV=6	1	34	34	27	62.4	70.288	1158900000	1559700000	1166600000	954690000	1419900000	1005000000	1611500000	410260000	543460000	240700000	1251958000	762184000	1.64259	-	0.106537
Q96RQ9	IL4I1	sp|Q96RQ9|OXLA_HUMAN L-amino-acid oxidase OS=Homo sapiens OX=9606 GN=IL4I1 PE=1 SV=1	1	5	5	5	11.1	62.88	215260000	133200000	139030000	272310000	78202000	59605000	158650000		88116000		167600400	1.02124e+08	1.64115	-	0.240481
P47897	QARS1	sp|P47897|SYQ_HUMAN Glutamine--tRNA ligase OS=Homo sapiens OX=9606 GN=QARS1 PE=1 SV=1	1	25	25	25	38.5	87.798	196820000	157710000	108860000	143260000	105760000	91083000	151180000	75525000	73712000	42871000	142482000	86874200	1.6401	-	0.0533079
P35268	RPL22	sp|P35268|RL22_HUMAN 60S ribosomal protein L22 OS=Homo sapiens OX=9606 GN=RPL22 PE=1 SV=2	1	3	3	3	39.1	14.787	932060000	1451500000	632690000	1457000000	892750000	656960000	1046600000	572230000	686650000	309360000	1073200000	654360000	1.64008	-	0.0720592
P11586	MTHFD1	sp|P11586|C1TC_HUMAN C-1-tetrahydrofolate synthase, cytoplasmic OS=Homo sapiens OX=9606 GN=MTHFD1 PE=1 SV=4	1	28	28	28	36.3	101.53	344920000	306460000	405480000	707500000	243890000	219040000	394020000	202990000	227710000	180940000	401650000	244940000	1.63979	-	0.11764
Q9Y2T2	AP3M1	sp|Q9Y2T2|AP3M1_HUMAN AP-3 complex subunit mu-1 OS=Homo sapiens OX=9606 GN=AP3M1 PE=1 SV=1	1	8	8	7	30.4	46.939	108450000	50596000	38705000	81932000	58277000	37856000	66992000	32531000	47869000	21022000	67592000	41254000	1.63844	-	0.109773
Q13247	SRSF6	sp|Q13247|SRSF6_HUMAN Serine/arginine-rich splicing factor 6 OS=Homo sapiens OX=9606 GN=SRSF6 PE=1 SV=2	1	8	8	4	22.1	39.586	226990000	375560000	206900000	312680000	78753000	153590000	243020000	57495000	152500000	126550000	240176600	146631000	1.63797	-	0.148994
P61011	SRP54	sp|P61011|SRP54_HUMAN Signal recognition particle subunit SRP54 OS=Homo sapiens OX=9606 GN=SRP54 PE=1 SV=1	1	9	9	9	19.4	55.704	189370000	182040000	99952000	250560000	109040000		130260000	123170000	66457000	86037000	166192400	101481000	1.63767	-	0.101354
P30405	PPIF	sp|P30405|PPIF_HUMAN Peptidyl-prolyl cis-trans isomerase F, mitochondrial OS=Homo sapiens OX=9606 GN=PPIF PE=1 SV=1	1	6	6	6	35.3	22.04	142640000	256230000	224990000	318530000	115620000	74606000	206570000	88202000	147850000		211602000	129307000	1.63643	-	0.142365
Q15642	TRIP10	sp|Q15642|CIP4_HUMAN Cdc42-interacting protein 4 OS=Homo sapiens OX=9606 GN=TRIP10 PE=1 SV=3	1	12	12	12	23.3	68.351	247290000	133270000	46465000	100590000	72880000	69135000	105240000	49034000	89946000	54674000	120099000	73605800	1.63165	-	0.238402
P14780	MMP9	sp|P14780|MMP9_HUMAN Matrix metalloproteinase-9 OS=Homo sapiens OX=9606 GN=MMP9 PE=1 SV=3	1	8	8	8	15.3	78.457	24505000	169900000	68308000	37274000	59867000		29866000	58917000	43645000		71970800	4.41427e+07	1.63041	-	0.454473
P07339	CTSD	sp|P07339|CATD_HUMAN Cathepsin D OS=Homo sapiens OX=9606 GN=CTSD PE=1 SV=1	1	15	15	15	42.2	44.552	2649400000	4480200000	1552300000	2404800000	2596400000	1649800000	2390100000	1040600000	2189300000	1124100000	2736620000	1678780000	1.63012	-	0.0909233
P50570	DNM2	sp|P50570|DYN2_HUMAN Dynamin-2 OS=Homo sapiens OX=9606 GN=DNM2 PE=1 SV=2	1	35	35	23	40.6	98.063	330720000	143100000	661640000	230100000	263510000	198230000	159130000	227740000	225080000	191850000	325814000	200406000	1.62577	-	0.201445
P53384;REV__Q8N7X0	NUBP1; ADGB	sp|P53384|NUBP1_HUMAN Cytosolic Fe-S cluster assembly factor NUBP1 OS=Homo sapiens OX=9606 GN=NUBP1 PE=1 SV=2;sp|Q8N7X0|ADGB_HUMAN Androglobin OS=Homo sapiens OX=9606 GN=ADGB PE=2 SV=3	2	2	2	2	5	34.534	157130000	83575000	70880000	233170000	57720000	69900000	124970000		58811000	42870000	120495000	74137750	1.62529	-	0.290881
Q53FA7	TP53I3	sp|Q53FA7|QORX_HUMAN Quinone oxidoreductase PIG3 OS=Homo sapiens OX=9606 GN=TP53I3 PE=1 SV=2	1	9	9	9	36.7	35.536	245830000	80065000	78249000	107250000	124270000	81910000	106830000	55563000	73465000	73857000	127132800	78325000	1.62314	-	0.165751
Q96TA1	NIBAN2	sp|Q96TA1|NIBA2_HUMAN Protein Niban 2 OS=Homo sapiens OX=9606 GN=NIBAN2 PE=1 SV=3	1	25	25	25	36.6	84.137	488260000	466830000	166080000	363560000	361190000	210290000	387350000	130300000	272380000	137640000	369184000	227592000	1.62213	-	0.0931937
O00764	PDXK	sp|O00764|PDXK_HUMAN Pyridoxal kinase OS=Homo sapiens OX=9606 GN=PDXK PE=1 SV=1	1	10	10	10	33.3	35.102	382460000	345390000	214250000	416600000	178630000	251580000	267680000	89486000	254420000	84719000	307466000	189577000	1.62185	-	0.098294
Q9UPU5	USP24	sp|Q9UPU5|UBP24_HUMAN Ubiquitin carboxyl-terminal hydrolase 24 OS=Homo sapiens OX=9606 GN=USP24 PE=1 SV=3	1	18	18	18	9.8	294.36	80714000	71399000	53210000	67181000	31603000	41478000	50730000		31478000	26374000	60821400	37515000	1.62126	-	0.0675818
P23786	CPT2	sp|P23786|CPT2_HUMAN Carnitine O-palmitoyltransferase 2, mitochondrial OS=Homo sapiens OX=9606 GN=CPT2 PE=1 SV=2	1	15	15	15	27.7	73.776	207890000	139180000	113740000	280260000	71197000	55830000	183710000		111260000	50031000	162453400	100207750	1.62117	-	0.252548
P33121;Q9UKU0	ACSL1	sp|P33121|ACSL1_HUMAN Long-chain-fatty-acid--CoA ligase 1 OS=Homo sapiens OX=9606 GN=ACSL1 PE=1 SV=1	2	15	15	14	23.9	77.942	75736000	292420000	126680000	106060000	99942000	64638000	117920000	98091000	94274000	57481000	140167600	86480800	1.62079	-	0.221527
P13473	LAMP2	sp|P13473|LAMP2_HUMAN Lysosome-associated membrane glycoprotein 2 OS=Homo sapiens OX=9606 GN=LAMP2 PE=1 SV=2	1	6	6	6	15.4	44.96	1044700000	1309900000	657190000	2456200000	935970000	792390000	1184000000	585610000	777450000	611800000	1280792000	790250000	1.62074	-	0.175184
Q9NVI7	ATAD3A	sp|Q9NVI7|ATD3A_HUMAN ATPase family AAA domain-containing protein 3A OS=Homo sapiens OX=9606 GN=ATAD3A PE=1 SV=2	1	15	15	3	24.6	71.368	179400000	329190000	179620000	177390000	95576000	122450000	201460000	85150000	100180000	84280000	192235200	118704000	1.61945	-	0.130801
P06730	EIF4E	sp|P06730|IF4E_HUMAN Eukaryotic translation initiation factor 4E OS=Homo sapiens OX=9606 GN=EIF4E PE=1 SV=2	1	4	4	4	18	25.097	69982000	100790000	74088000	89425000	57218000	59121000	89401000	27089000	38542000	27949000	78300600	48420400	1.6171	-	0.0655354
Q15428	SF3A2	sp|Q15428|SF3A2_HUMAN Splicing factor 3A subunit 2 OS=Homo sapiens OX=9606 GN=SF3A2 PE=1 SV=2	1	6	6	6	18.3	49.255	102320000	92629000	99878000	192120000	50015000	66289000	79794000		75578000	44179000	107392400	66460000	1.6159	-	0.176399
P04839;Q9Y5S8	CYBB	sp|P04839|CY24B_HUMAN Cytochrome b-245 heavy chain OS=Homo sapiens OX=9606 GN=CYBB PE=1 SV=2	2	10	10	10	16.7	65.335	228740000	307990000	170240000	138040000	114280000	50369000	248110000		107770000	69212000	191858000	118865250	1.61408	-	0.231191
Q8TAQ2	SMARCC2	sp|Q8TAQ2|SMRC2_HUMAN SWI/SNF complex subunit SMARCC2 OS=Homo sapiens OX=9606 GN=SMARCC2 PE=1 SV=1	1	25	25	16	24.4	132.88	193120000	252970000	200870000	124160000	171470000	108890000	217970000	76721000	118490000	61946000	188518000	116803400	1.61398	-	0.0706394
Q9HAV4	XPO5	sp|Q9HAV4|XPO5_HUMAN Exportin-5 OS=Homo sapiens OX=9606 GN=XPO5 PE=1 SV=1	1	11	11	11	10.7	136.31	23603000	30834000	44257000	60932000		26296000	22797000	21165000	28711000		39906500	24742250	1.61289	-	0.120554
Q9HC16	APOBEC3G	sp|Q9HC16|ABC3G_HUMAN DNA dC->dU-editing enzyme APOBEC-3G OS=Homo sapiens OX=9606 GN=APOBEC3G PE=1 SV=1	1	6	6	5	19.5	46.407	33119000	33965000	13438000	34813000	23594000	12326000	17838000		21563000		27785800	1.72423e+07	1.61149	-	0.120629
Q13510	ASAH1	sp|Q13510|ASAH1_HUMAN Acid ceramidase OS=Homo sapiens OX=9606 GN=ASAH1 PE=1 SV=5	1	7	7	7	18.2	44.659	310250000	466200000	119350000	136790000	154250000	119470000	177580000	71785000	220510000		237368000	147336250	1.61106	-	0.301577
P30038	ALDH4A1	sp|P30038|AL4A1_HUMAN Delta-1-pyrroline-5-carboxylate dehydrogenase, mitochondrial OS=Homo sapiens OX=9606 GN=ALDH4A1 PE=1 SV=3	1	16	16	16	39.8	61.719	181670000	181700000	364950000	30193000	107430000	92864000	159240000	84039000	114320000	87713000	173188600	107635200	1.60903	-	0.28535
Q9BY32	ITPA	sp|Q9BY32|ITPA_HUMAN Inosine triphosphate pyrophosphatase OS=Homo sapiens OX=9606 GN=ITPA PE=1 SV=2	1	7	7	7	45.4	21.445	341320000	289380000	81018000	83418000	54610000	132380000	108390000	88661000	93286000		169949200	105679250	1.60816	-	0.380901
P49321	NASP	sp|P49321|NASP_HUMAN Nuclear autoantigenic sperm protein OS=Homo sapiens OX=9606 GN=NASP PE=1 SV=2	1	20	20	20	33.9	85.237	351760000	444640000	470890000	525030000	188850000	277520000	366990000	143920000	245770000	198070000	396234000	246454000	1.60774	-	0.0646288
Q04837	SSBP1	sp|Q04837|SSBP_HUMAN Single-stranded DNA-binding protein, mitochondrial OS=Homo sapiens OX=9606 GN=SSBP1 PE=1 SV=1	1	6	6	6	41.9	17.259	521440000	628020000	549850000	567260000	212750000	285300000	539320000	176570000	291760000	249880000	495864000	308566000	1.60699	-	0.0846545
O75718	CRTAP	sp|O75718|CRTAP_HUMAN Cartilage-associated protein OS=Homo sapiens OX=9606 GN=CRTAP PE=1 SV=1	1	10	10	10	26.2	46.561	104380000	87525000	91862000	129680000	50729000	38553000	98633000	78911000	35018000	37839000	92835200	57790800	1.6064	-	0.0917409
P46778	RPL21	sp|P46778|RL21_HUMAN 60S ribosomal protein L21 OS=Homo sapiens OX=9606 GN=RPL21 PE=1 SV=2	1	4	4	4	26.9	18.565	694490000	1248600000	668040000	980560000	519550000	349310000	707150000	538270000	696120000	268930000	822248000	511956000	1.60609	-	0.0845023
P55795	HNRNPH2	sp|P55795|HNRH2_HUMAN Heterogeneous nuclear ribonucleoprotein H2 OS=Homo sapiens OX=9606 GN=HNRNPH2 PE=1 SV=1	1	13	8	8	43.4	49.263	256750000	251200000	194920000	415570000	179850000	172790000	336120000	77136000	154770000	67572000	259658000	161677600	1.60602	-	0.163481
P07858	CTSB	sp|P07858|CATB_HUMAN Cathepsin B OS=Homo sapiens OX=9606 GN=CTSB PE=1 SV=3	1	14	14	14	49	37.821	984890000	1354800000	670470000	910360000	1344800000	559330000	1144000000	379840000	939620000	257940000	1053064000	656146000	1.60492	-	0.0998407
Q8N163	CCAR2	sp|Q8N163|CCAR2_HUMAN Cell cycle and apoptosis regulator protein 2 OS=Homo sapiens OX=9606 GN=CCAR2 PE=1 SV=2	1	16	16	16	21.5	102.9	347270000	239860000	211990000	120320000	182870000	170260000	163530000	50366000	181040000	121770000	220462000	137393200	1.60461	-	0.0983718
P08621	SNRNP70	sp|P08621|RU17_HUMAN U1 small nuclear ribonucleoprotein 70 kDa OS=Homo sapiens OX=9606 GN=SNRNP70 PE=1 SV=2	1	11	11	11	21.5	51.556	398730000	494200000	290210000	436130000	168710000	292120000	233910000	148090000	235840000	204890000	357596000	222970000	1.60379	-	0.0628537
Q13428	TCOF1	sp|Q13428|TCOF_HUMAN Treacle protein OS=Homo sapiens OX=9606 GN=TCOF1 PE=1 SV=3	1	11	11	11	8.1	152.1	38396000	39867000	41963000	61603000		24629000	27297000		33137000		45457250	2.83543e+07	1.60319	-	0.0525668
Q16513	PKN2	sp|Q16513|PKN2_HUMAN Serine/threonine-protein kinase N2 OS=Homo sapiens OX=9606 GN=PKN2 PE=1 SV=1	1	11	11	10	11.4	112.03	37827000	59725000	42189000	72206000	29738000	28411000	48191000	25615000	22117000	26738000	48337000	30214400	1.5998	-	0.0787443
P62330	ARF6	sp|P62330|ARF6_HUMAN ADP-ribosylation factor 6 OS=Homo sapiens OX=9606 GN=ARF6 PE=1 SV=2	1	6	6	6	44.6	20.082	395780000	346440000	201040000	206460000	256240000	151060000	341370000	78716000	185140000	122610000	281192000	175779200	1.59969	-	0.113486
Q9Y6E2	BZW2	sp|Q9Y6E2|5MP1_HUMAN eIF5-mimic protein 1 OS=Homo sapiens OX=9606 GN=BZW2 PE=1 SV=1	1	13	13	13	29.1	48.162	188350000	158870000	142980000	265420000	107540000	66932000	296210000	66651000	52433000	57381000	172632000	107921400	1.59961	-	0.266251
Q9BTT6	LRRC1	sp|Q9BTT6|LRRC1_HUMAN Leucine-rich repeat-containing protein 1 OS=Homo sapiens OX=9606 GN=LRRC1 PE=1 SV=1	1	8	6	6	20.6	59.241	66469000	87245000	44742000	76091000	20882000	16746000	57320000		35234000	38712000	59085800	37003000	1.59678	-	0.191591
Q86X10	RALGAPB	sp|Q86X10|RLGPB_HUMAN Ral GTPase-activating protein subunit beta OS=Homo sapiens OX=9606 GN=RALGAPB PE=1 SV=1	1	9	9	9	8.4	166.8	148840000	118680000	95821000	62059000	82326000	52907000	75496000		68101000	58055000	101545200	63639750	1.59563	-	0.0677892
Q9NQT8	KIF13B	sp|Q9NQT8|KI13B_HUMAN Kinesin-like protein KIF13B OS=Homo sapiens OX=9606 GN=KIF13B PE=1 SV=2	1	9	9	9	5.9	202.79	48803000	84823000	34079000	57186000	45397000		34975000		48880000	17920000	54057600	33925000	1.59344	-	0.17604
P16144	ITGB4	sp|P16144|ITB4_HUMAN Integrin beta-4 OS=Homo sapiens OX=9606 GN=ITGB4 PE=1 SV=5	1	32	32	32	23.1	202.16	39564000	94251000	109560000	402380000	135050000	80000000	96873000	97689000	126040000	90307000	156161000	98181800	1.59053	-	0.391221
P51159	RAB27A	sp|P51159|RB27A_HUMAN Ras-related protein Rab-27A OS=Homo sapiens OX=9606 GN=RAB27A PE=1 SV=3	1	6	6	4	28.1	24.868	65644000	132040000	88406000	141820000	101630000	64085000	116740000	29448000	82416000	40330000	105908000	66603800	1.59012	-	0.0971878
Q9H0D6	XRN2	sp|Q9H0D6|XRN2_HUMAN 5-3 exoribonuclease 2 OS=Homo sapiens OX=9606 GN=XRN2 PE=1 SV=1	1	10	10	10	11.8	108.58	40460000	45886000	52057000	76515000	50505000	40372000	42112000		32140000	18921000	53084600	33386250	1.59001	-	0.0519499
P38117	ETFB	sp|P38117|ETFB_HUMAN Electron transfer flavoprotein subunit beta OS=Homo sapiens OX=9606 GN=ETFB PE=1 SV=3	1	15	15	15	54.1	27.843	933490000	762710000	493950000	694300000	345740000	410700000	626110000	345370000	383400000	266900000	646038000	406496000	1.58929	-	0.0792045
P05198	EIF2S1	sp|P05198|IF2A_HUMAN Eukaryotic translation initiation factor 2 subunit 1 OS=Homo sapiens OX=9606 GN=EIF2S1 PE=1 SV=3	1	18	18	18	58.7	36.112	273680000	262500000	218450000	426840000	206090000	153270000	255820000	179760000	163120000	121150000	277512000	174624000	1.5892	-	0.0531367
Q86U86	PBRM1	sp|Q86U86|PB1_HUMAN Protein polybromo-1 OS=Homo sapiens OX=9606 GN=PBRM1 PE=1 SV=1	1	10	10	10	7.3	192.95	88518000	133880000	120250000	70248000	67359000	60223000	99000000		29394000	53154000	96051000	60442750	1.58912	-	0.114355
Q6PKG0;Q659C4	LARP1	sp|Q6PKG0|LARP1_HUMAN La-related protein 1 OS=Homo sapiens OX=9606 GN=LARP1 PE=1 SV=2	2	11	11	11	10.1	123.51	54497000	61427000	51708000	110210000	41017000	38168000	50425000		31845000		63771800	40146000	1.5885	-	0.203871
P41567;O60739	EIF1; EIF1B	sp|P41567|EIF1_HUMAN Eukaryotic translation initiation factor 1 OS=Homo sapiens OX=9606 GN=EIF1 PE=1 SV=1;sp|O60739|EIF1B_HUMAN Eukaryotic translation initiation factor 1b OS=Homo sapiens OX=9606 GN=EIF1B PE=1 SV=2	2	4	4	4	61.1	12.732	91551000	64819000	89671000	117070000		99176000	40617000		31562000	57657000	90777750	57253000	1.58555	-	0.118246
Q9BV20	MRI1	sp|Q9BV20|MTNA_HUMAN Methylthioribose-1-phosphate isomerase OS=Homo sapiens OX=9606 GN=MRI1 PE=1 SV=1	1	8	8	8	26.6	39.149	41630000	32009000	83602000	109360000	67910000	37768000	27195000	27603000	63080000	55376000	66902200	42204400	1.58519	-	0.157134
Q14157	UBAP2L	sp|Q14157|UBP2L_HUMAN Ubiquitin-associated protein 2-like OS=Homo sapiens OX=9606 GN=UBAP2L PE=1 SV=2	1	3	3	3	3.3	114.53	59916000	51602000	141290000	58862000		66834000	46490000	53119000	30230000		77917500	49168250	1.58471	-	0.249041
P29350	PTPN6	sp|P29350|PTN6_HUMAN Tyrosine-protein phosphatase non-receptor type 6 OS=Homo sapiens OX=9606 GN=PTPN6 PE=1 SV=1	1	19	19	19	39	67.56	322710000	424240000	286110000	213590000	226040000	190650000	496290000	102990000	86349000	54014000	294538000	186058600	1.58304	-	0.259066
Q5JTH9	RRP12	sp|Q5JTH9|RRP12_HUMAN RRP12-like protein OS=Homo sapiens OX=9606 GN=RRP12 PE=1 SV=2	1	16	15	15	13.1	143.7	53631000	111320000	93054000	73011000	40082000	39294000	64417000		36952000		74219600	4.68877e+07	1.58292	-	0.186812
O15294	OGT	sp|O15294|OGT1_HUMAN UDP-N-acetylglucosamine--peptide N-acetylglucosaminyltransferase 110 kDa subunit OS=Homo sapiens OX=9606 GN=OGT PE=1 SV=3	1	11	11	11	12.4	116.92	32704000	41808000	52778000	44921000	22850000	23116000	32512000		18400000		39012200	24676000	1.58098	-	0.10529
P08240	SRPRA	sp|P08240|SRPRA_HUMAN Signal recognition particle receptor subunit alpha OS=Homo sapiens OX=9606 GN=SRPRA PE=1 SV=2	1	13	13	13	21.3	69.81	79341000	92847000	78525000	75404000	44639000	33748000	75024000	27101000	51898000		74151200	46942750	1.57961	-	0.0755277
P62304	SNRPE	sp|P62304|RUXE_HUMAN Small nuclear ribonucleoprotein E OS=Homo sapiens OX=9606 GN=SNRPE PE=1 SV=1	1	2	2	2	25	10.803	875630000	891960000	647260000	619200000	359920000	424310000	598620000		522520000	173770000	678794000	429805000	1.57931	-	0.112563
P54136	RARS1	sp|P54136|SYRC_HUMAN Arginine--tRNA ligase, cytoplasmic OS=Homo sapiens OX=9606 GN=RARS1 PE=1 SV=2	1	30	30	30	50	75.378	268890000	316580000	186290000	328010000	193820000	176690000	257060000	101250000	177090000	109080000	258718000	164234000	1.5753	-	0.0502163
P30740;O75830	SERPINB1	sp|P30740|ILEU_HUMAN Leukocyte elastase inhibitor OS=Homo sapiens OX=9606 GN=SERPINB1 PE=1 SV=1	2	18	18	17	52	42.741	744920000	967060000	451480000	837470000	1064800000	469880000	931470000	337910000	614230000	229310000	813146000	516560000	1.57416	-	0.10353
Q12996	CSTF3	sp|Q12996|CSTF3_HUMAN Cleavage stimulation factor subunit 3 OS=Homo sapiens OX=9606 GN=CSTF3 PE=1 SV=1	1	10	10	10	17.3	82.921	45746000	51769000	39929000	63930000	28372000	29034000	54758000	19430000	28475000	14366000	45949200	29212600	1.57292	-	0.104533
P62136	PPP1CA	sp|P62136|PP1A_HUMAN Serine/threonine-protein phosphatase PP1-alpha catalytic subunit OS=Homo sapiens OX=9606 GN=PPP1CA PE=1 SV=1	1	15	3	3	49.4	37.512	401960000	287770000	157110000	309910000	170240000	161570000	279290000		143960000	90306000	265398000	168781500	1.57244	-	0.166622
Q9UHD9	UBQLN2	sp|Q9UHD9|UBQL2_HUMAN Ubiquilin-2 OS=Homo sapiens OX=9606 GN=UBQLN2 PE=1 SV=2	1	7	7	5	15.2	65.695	155700000	160990000	90845000	235980000	125070000	90562000	126260000	87363000	64061000	120610000	153717000	97771200	1.57221	-	0.0691975
P11802	CDK4	sp|P11802|CDK4_HUMAN Cyclin-dependent kinase 4 OS=Homo sapiens OX=9606 GN=CDK4 PE=1 SV=2	1	8	7	7	32.3	33.729	68380000	91992000	82752000	167130000	49698000	52381000	82657000	42668000	56571000		91990400	58569250	1.57063	-	0.206226
P13667	PDIA4	sp|P13667|PDIA4_HUMAN Protein disulfide-isomerase A4 OS=Homo sapiens OX=9606 GN=PDIA4 PE=1 SV=2	1	35	35	35	50.1	72.932	951650000	901400000	724380000	1490100000	958650000	644470000	848280000	453210000	887580000	370290000	1005236000	640766000	1.5688	-	0.0577429
Q9UHX1	PUF60	sp|Q9UHX1|PUF60_HUMAN Poly(U)-binding-splicing factor PUF60 OS=Homo sapiens OX=9606 GN=PUF60 PE=1 SV=1	1	18	18	18	34	59.875	209790000	255980000	257660000	365410000	230480000	174400000	282980000	122170000	165800000	96128000	263864000	168295600	1.56786	-	0.0516589
Q9NPA0	EMC7	sp|Q9NPA0|EMC7_HUMAN ER membrane protein complex subunit 7 OS=Homo sapiens OX=9606 GN=EMC7 PE=1 SV=1	1	4	4	4	26.4	26.47	89669000	69132000	70052000	74383000	56688000		67774000		44752000	25384000	71984800	45970000	1.56591	-	0.0628275
Q93050	ATP6V0A1	sp|Q93050|VPP1_HUMAN V-type proton ATPase 116 kDa subunit a 1 OS=Homo sapiens OX=9606 GN=ATP6V0A1 PE=1 SV=3	1	9	9	9	13.9	96.412	87121000	81451000	43394000	54221000	48552000	34273000	61177000		31590000	33757000	62947800	40199250	1.56589	-	0.0963036
O95881	TXNDC12	sp|O95881|TXD12_HUMAN Thioredoxin domain-containing protein 12 OS=Homo sapiens OX=9606 GN=TXNDC12 PE=1 SV=1	1	6	6	6	40.1	19.206	179650000	302390000	182350000	542930000	170860000	203300000	310730000	135720000	147690000	83172000	275636000	176122400	1.56503	-	0.253772
Q9UQ80	PA2G4	sp|Q9UQ80|PA2G4_HUMAN Proliferation-associated protein 2G4 OS=Homo sapiens OX=9606 GN=PA2G4 PE=1 SV=3	1	21	21	21	61.4	43.786	874030000	1216600000	806900000	965940000	532860000	607380000	882330000	316640000	634420000	371400000	879266000	562434000	1.56332	-	0.0683843
P55061	TMBIM6	sp|P55061|BI1_HUMAN Bax inhibitor 1 OS=Homo sapiens OX=9606 GN=TMBIM6 PE=1 SV=2	1	3	3	3	9.3	26.537	124050000	108800000	69902000	99347000	83350000	38233000	98380000	29260000	82736000	61926000	97089800	62107000	1.56327	-	0.0616063
Q9P2D3	HEATR5B	sp|Q9P2D3|HTR5B_HUMAN HEAT repeat-containing protein 5B OS=Homo sapiens OX=9606 GN=HEATR5B PE=1 SV=2	1	7	7	7	5.1	224.3	67871000	52017000	38122000	28999000	27771000	25254000	45025000		22145000	17510000	42956000	27483500	1.56297	-	0.170035
O95163	ELP1	sp|O95163|ELP1_HUMAN Elongator complex protein 1 OS=Homo sapiens OX=9606 GN=ELP1 PE=1 SV=3	1	8	8	8	9.3	150.25	42520000	28449000		46628000		23318000	40179000	18870000	17996000		39199000	25090750	1.56229	-	0.124468
P08238;Q58FF7	HSP90AB1	sp|P08238|HS90B_HUMAN Heat shock protein HSP 90-beta OS=Homo sapiens OX=9606 GN=HSP90AB1 PE=1 SV=4	2	48	46	25	58.4	83.263	3324000000	5046700000	4158200000	8014900000	3179500000	3660900000	3883600000	2296500000	3745200000	1607200000	4744660000	3038680000	1.56142	-	0.12475
Q92820	GGH	sp|Q92820|GGH_HUMAN Gamma-glutamyl hydrolase OS=Homo sapiens OX=9606 GN=GGH PE=1 SV=2	1	10	10	10	36.8	35.964	633830000	610270000	518700000	540570000	368180000	354850000	642020000		218030000	154010000	534310000	342227500	1.56127	-	0.121091
P50281	MMP14	sp|P50281|MMP14_HUMAN Matrix metalloproteinase-14 OS=Homo sapiens OX=9606 GN=MMP14 PE=1 SV=3	1	9	9	9	19.1	65.893	32762000	34963000	62008000	138650000	47806000	28785000	51585000	38882000	42246000	41228000	63237800	40545200	1.55969	-	0.287163
Q27J81	INF2	sp|Q27J81|INF2_HUMAN Inverted formin-2 OS=Homo sapiens OX=9606 GN=INF2 PE=1 SV=2	1	13	13	13	13.7	135.62	63042000	36272000	45066000	80049000	33864000	32602000	37586000	40056000	41232000	14292000	51658600	33153600	1.55816	-	0.102914
P09917	ALOX5	sp|P09917|LOX5_HUMAN Polyunsaturated fatty acid 5-lipoxygenase OS=Homo sapiens OX=9606 GN=ALOX5 PE=1 SV=2	1	11	11	11	19.1	77.982	47864000	56822000	30423000	18812000	33398000	10154000	51511000		10551000		37463800	24072000	1.55632	-	0.356883
P27707	DCK	sp|P27707|DCK_HUMAN Deoxycytidine kinase OS=Homo sapiens OX=9606 GN=DCK PE=1 SV=1	1	7	7	7	26.2	30.518	82068000	115950000	111010000	109650000	62356000	59601000	109590000		50093000	28098000	96206800	61845500	1.5556	-	0.115641
O95870	ABHD16A	sp|O95870|ABHGA_HUMAN Phosphatidylserine lipase ABHD16A OS=Homo sapiens OX=9606 GN=ABHD16A PE=1 SV=3	1	12	12	12	24.4	63.243	57354000	82080000	60497000	152380000	44444000	57128000	79412000		45261000	22488000	79351000	51072250	1.5537	-	0.280335
Q32MZ4	LRRFIP1	sp|Q32MZ4|LRRF1_HUMAN Leucine-rich repeat flightless-interacting protein 1 OS=Homo sapiens OX=9606 GN=LRRFIP1 PE=1 SV=2	1	8	8	8	11.4	89.252	90732000	62946000	48220000	82606000	53210000	58190000	62028000	39345000	29869000	27971000	67542800	43480600	1.5534	-	0.0579524
Q9NUQ8	ABCF3	sp|Q9NUQ8|ABCF3_HUMAN ATP-binding cassette sub-family F member 3 OS=Homo sapiens OX=9606 GN=ABCF3 PE=1 SV=2	1	11	11	11	23.7	79.744	46633000	89072000	55893000	84511000	26231000	21828000	90988000		22476000	20524000	60468000	38954000	1.55229	-	0.323812
Q969H8	MYDGF	sp|Q969H8|MYDGF_HUMAN Myeloid-derived growth factor OS=Homo sapiens OX=9606 GN=MYDGF PE=1 SV=1	1	5	5	5	37	18.795	529710000	530070000	338050000	919400000	670250000	379790000	484750000	390240000	460260000	211070000	597496000	385222000	1.55104	-	0.0838309
Q16822;P35558	PCK2	sp|Q16822|PCKGM_HUMAN Phosphoenolpyruvate carboxykinase [GTP], mitochondrial OS=Homo sapiens OX=9606 GN=PCK2 PE=1 SV=4	2	14	14	14	24.1	70.698	75978000	49092000	41540000	36371000	21316000	13065000	48429000		25402000		44859400	2.89653e+07	1.54873	-	0.305765
Q13617	CUL2	sp|Q13617|CUL2_HUMAN Cullin-2 OS=Homo sapiens OX=9606 GN=CUL2 PE=1 SV=2	1	19	19	19	26.8	86.982	86085000	128690000	103650000	143890000	66802000	81755000	87231000	75673000	55285000	41752000	105823400	68339200	1.5485	-	0.051235
O95302;Q75LS8	FKBP9	sp|O95302|FKBP9_HUMAN Peptidyl-prolyl cis-trans isomerase FKBP9 OS=Homo sapiens OX=9606 GN=FKBP9 PE=1 SV=2	2	11	11	10	20.7	63.083	188820000	107080000	149850000	278850000	134600000	88813000	145150000	167170000	95450000	58347000	171840000	110986000	1.5483	-	0.127576
Q9BQ39	DDX50	sp|Q9BQ39|DDX50_HUMAN ATP-dependent RNA helicase DDX50 OS=Homo sapiens OX=9606 GN=DDX50 PE=1 SV=1	1	9	7	7	14.9	82.564	24911000	71766000	57565000	54105000	20700000	28995000	38520000		35702000	15271000	45809400	29622000	1.54647	-	0.222148
Q9BUJ2	HNRNPUL1	sp|Q9BUJ2|HNRL1_HUMAN Heterogeneous nuclear ribonucleoprotein U-like protein 1 OS=Homo sapiens OX=9606 GN=HNRNPUL1 PE=1 SV=2	1	17	17	17	21.7	95.737	548550000	350080000	349490000	281350000	238310000	290710000	383010000	150600000	220480000	98359000	353556000	228631800	1.5464	-	0.126578
P57737	CORO7	sp|P57737|CORO7_HUMAN Coronin-7 OS=Homo sapiens OX=9606 GN=CORO7 PE=1 SV=2	1	13	13	13	22.2	100.6	66090000	74321000	67490000	66019000	65011000	44399000	92900000	41199000	25319000	15427000	67786200	43848800	1.54591	-	0.113121
P27635;Q96L21	RPL10	sp|P27635|RL10_HUMAN 60S ribosomal protein L10 OS=Homo sapiens OX=9606 GN=RPL10 PE=1 SV=5	2	10	10	10	43.5	24.577	552180000	568010000	289420000	528170000	280650000	319470000	396880000	166550000	415030000	137860000	443686000	287158000	1.54509	-	0.109327
P14618	PKM	sp|P14618|KPYM_HUMAN Pyruvate kinase PKM OS=Homo sapiens OX=9606 GN=PKM PE=1 SV=4	1	43	43	42	79.7	57.936	13775000000	7527200000	6554800000	12643000000	5614600000	7568400000	7159900000	3948300000	7874000000	3305800000	9222920000	5971280000	1.54455	-	0.129887
P18124	RPL7	sp|P18124|RL7_HUMAN 60S ribosomal protein L7 OS=Homo sapiens OX=9606 GN=RPL7 PE=1 SV=1	1	14	14	14	39.5	29.225	762200000	757670000	401110000	739790000	311310000	368070000	631860000	269900000	399880000	255470000	594416000	385036000	1.54379	-	0.117477
O60343	TBC1D4	sp|O60343|TBCD4_HUMAN TBC1 domain family member 4 OS=Homo sapiens OX=9606 GN=TBC1D4 PE=1 SV=2	1	5	5	4	4.9	146.56	10306000		23124000		12424000	8975000	7720400		13011000		1.52847e+07	9.90213e+06	1.54357	-	0.276577
P09496	CLTA	sp|P09496|CLCA_HUMAN Clathrin light chain A OS=Homo sapiens OX=9606 GN=CLTA PE=1 SV=1	1	7	7	7	19.8	27.076	264180000	537400000	398800000	655220000	332850000	247330000	365880000	306460000	267690000	230430000	437690000	283558000	1.54356	-	0.072935
Q16630	CPSF6	sp|Q16630|CPSF6_HUMAN Cleavage and polyadenylation specificity factor subunit 6 OS=Homo sapiens OX=9606 GN=CPSF6 PE=1 SV=2	1	5	5	5	11.6	59.209	138120000	120770000	92617000	131280000	59954000	66076000	105540000	39580000	104780000	35725000	108548200	70340200	1.54319	-	0.10506
P19525	EIF2AK2	sp|P19525|E2AK2_HUMAN Interferon-induced, double-stranded RNA-activated protein kinase OS=Homo sapiens OX=9606 GN=EIF2AK2 PE=1 SV=2	1	10	10	10	19.2	62.094	123750000	141040000	124630000	249510000	102100000	119680000	68784000	86646000	145750000	59762000	148206000	96124400	1.54181	-	0.127545
Q02790	FKBP4	sp|Q02790|FKBP4_HUMAN Peptidyl-prolyl cis-trans isomerase FKBP4 OS=Homo sapiens OX=9606 GN=FKBP4 PE=1 SV=3	1	21	21	21	50.1	51.804	216860000	376150000	382150000	364790000	188780000	199880000	263150000	192520000	201790000	135090000	305746000	198486000	1.54039	-	0.0517548
Q9NZT1	CALML5	sp|Q9NZT1|CALL5_HUMAN Calmodulin-like protein 5 OS=Homo sapiens OX=9606 GN=CALML5 PE=1 SV=2	1	15	15	15	91.8	15.892	5610900000	4342100000	17949000	96471000		691590000	5794800000	43331000	9826600		2516855000	1634886900	1.53947	-	0.675846
P62857	RPS28	sp|P62857|RS28_HUMAN 40S ribosomal protein S28 OS=Homo sapiens OX=9606 GN=RPS28 PE=1 SV=1	1	3	3	3	46.4	7.8409	462560000	456370000	281390000	562450000	258020000	227000000	335430000		282630000	205520000	404158000	262645000	1.5388	-	0.0855769
P00492	HPRT1	sp|P00492|HPRT_HUMAN Hypoxanthine-guanine phosphoribosyltransferase OS=Homo sapiens OX=9606 GN=HPRT1 PE=1 SV=2	1	9	9	8	48.6	24.579	447630000	323950000	285350000	550550000	196500000	310360000	318990000	191520000	197660000	153830000	360796000	234472000	1.53876	-	0.112134
Q9BWF3	RBM4	sp|Q9BWF3|RBM4_HUMAN RNA-binding protein 4 OS=Homo sapiens OX=9606 GN=RBM4 PE=1 SV=1	1	9	9	1	31.6	40.313	71971000	67497000	101550000	167630000	67166000	64612000	52099000		64094000	66647000	95162800	61863000	1.53828	-	0.173419
P28066	PSMA5	sp|P28066|PSA5_HUMAN Proteasome subunit alpha type-5 OS=Homo sapiens OX=9606 GN=PSMA5 PE=1 SV=3	1	10	10	10	49.8	26.411	458100000	461550000	394000000	777300000	368340000	335470000	421040000	257500000	387140000	198020000	491858000	319834000	1.53785	-	0.0755844
P21283;Q8NEY4	ATP6V1C1	sp|P21283|VATC1_HUMAN V-type proton ATPase subunit C 1 OS=Homo sapiens OX=9606 GN=ATP6V1C1 PE=1 SV=4	2	13	13	13	32.5	43.941	126960000	180690000	111390000	136580000	98190000	76478000	133780000	67298000	96576000	51392000	130762000	85104800	1.53648	-	0.0519114
Q9NUQ9	CYRIB	sp|Q9NUQ9|CYRIB_HUMAN CYFIP-related Rac1 interactor B OS=Homo sapiens OX=9606 GN=CYRIB PE=1 SV=1	1	11	11	10	44.8	36.748	140080000	117000000	115530000	194030000	114350000	112860000	139130000	77083000	70970000	43402000	136198000	88689000	1.53568	-	0.0692068
P51151	RAB9A	sp|P51151|RAB9A_HUMAN Ras-related protein Rab-9A OS=Homo sapiens OX=9606 GN=RAB9A PE=1 SV=1	1	6	6	5	39.8	22.837	79723000	78474000	85035000	343930000	137190000	91514000	86001000		106080000	93879000	144870400	94368500	1.53516	-	0.411931
O60664	PLIN3	sp|O60664|PLIN3_HUMAN Perilipin-3 OS=Homo sapiens OX=9606 GN=PLIN3 PE=1 SV=3	1	21	21	21	59.9	47.074	742460000	348120000	349280000	413960000	338160000	419270000	364310000	145190000	291570000	207600000	438396000	285588000	1.53506	-	0.135108
Q9BZH6	WDR11	sp|Q9BZH6|WDR11_HUMAN WD repeat-containing protein 11 OS=Homo sapiens OX=9606 GN=WDR11 PE=1 SV=1	1	18	18	18	20.4	136.68	77678000	87310000	57730000	105020000	41235000	39745000	80368000	45190000	50691000	24422000	73794600	48083200	1.53473	-	0.11313
Q92544	TM9SF4	sp|Q92544|TM9S4_HUMAN Transmembrane 9 superfamily member 4 OS=Homo sapiens OX=9606 GN=TM9SF4 PE=1 SV=2	1	8	8	8	16.7	74.518	522170000	586630000	353520000	294060000	179040000		333640000	237470000	186460000		387084000	2.52523e+08	1.53286	-	0.244351
P05387	RPLP2	sp|P05387|RLA2_HUMAN 60S acidic ribosomal protein P2 OS=Homo sapiens OX=9606 GN=RPLP2 PE=1 SV=1	1	6	6	6	48.7	11.665	2293600000	2038000000	1237800000	1736900000	962080000	1183600000	1846600000	650780000	1142400000	571300000	1653676000	1078936000	1.53269	-	0.125734
Q9UBF2	COPG2	sp|Q9UBF2|COPG2_HUMAN Coatomer subunit gamma-2 OS=Homo sapiens OX=9606 GN=COPG2 PE=1 SV=1	1	10	9	9	14	97.621	64818000	61982000	67003000	79288000	32871000	43288000	41825000	34738000			61192400	3.99503e+07	1.53171	-	0.0873548
Q14116	IL18	sp|Q14116|IL18_HUMAN Interleukin-18 OS=Homo sapiens OX=9606 GN=IL18 PE=1 SV=1	1	3	3	3	13.5	22.326	81044000	210650000	77388000	52062000	31587000	21089000	126860000		29507000		90546200	59152000	1.53074	-	0.542093
O43852	CALU	sp|O43852|CALU_HUMAN Calumenin OS=Homo sapiens OX=9606 GN=CALU PE=1 SV=2	1	20	20	20	63.2	37.106	568300000	303770000	470240000	760340000	407860000	374490000	337300000	337140000	385340000	206220000	502102000	328098000	1.53034	-	0.0717603
Q92925	SMARCD2	sp|Q92925|SMRD2_HUMAN SWI/SNF-related matrix-associated actin-dependent regulator of chromatin subfamily D member 2 OS=Homo sapiens OX=9606 GN=SMARCD2 PE=1 SV=3	1	8	8	7	19.4	58.92	104270000	96600000	71103000	64736000	55044000	50390000	77730000		44305000	32393000	78350600	51204500	1.53015	-	0.086761
O60271;Q9UPT6	SPAG9	sp|O60271|JIP4_HUMAN C-Jun-amino-terminal kinase-interacting protein 4 OS=Homo sapiens OX=9606 GN=SPAG9 PE=1 SV=4	2	12	12	12	13.3	146.2	34680000	47127000	27546000	65267000	40329000	42307000	27793000	22843000	19450000		42989800	28098250	1.52998	-	0.124438
Q8N1G2	CMTR1	sp|Q8N1G2|CMTR1_HUMAN Cap-specific mRNA (nucleoside-2-O-)-methyltransferase 1 OS=Homo sapiens OX=9606 GN=CMTR1 PE=1 SV=1	1	7	7	7	7.8	95.32	13295000	26035000	14379000	32900000	15289000	11530000	13367000		15075000		20379600	13324000	1.52954	-	0.225617
P61247	RPS3A	sp|P61247|RS3A_HUMAN 40S ribosomal protein S3a OS=Homo sapiens OX=9606 GN=RPS3A PE=1 SV=2	1	13	13	13	45.5	29.945	2139800000	2007900000	1433400000	2738000000	1263700000	1278600000	1885800000	1184600000	1197100000	720280000	1916560000	1253276000	1.52924	-	0.0740305
O95295	SNAPIN	sp|O95295|SNAPN_HUMAN SNARE-associated protein Snapin OS=Homo sapiens OX=9606 GN=SNAPIN PE=1 SV=1	1	3	3	3	27.9	14.874	112180000	68034000	40673000		44274000	51298000	35097000		43665000		66290250	4.33533e+07	1.52907	-	0.300345
P35222	CTNNB1	sp|P35222|CTNB1_HUMAN Catenin beta-1 OS=Homo sapiens OX=9606 GN=CTNNB1 PE=1 SV=1	1	22	19	19	37.1	85.496	659860000	275970000	191210000	238940000	237540000	220420000	229490000	162510000	287330000	150810000	320704000	210112000	1.52635	-	0.250846
P62841	RPS15	sp|P62841|RS15_HUMAN 40S ribosomal protein S15 OS=Homo sapiens OX=9606 GN=RPS15 PE=1 SV=2	1	5	5	5	35.9	17.04	431400000	415400000	314270000	502750000	207660000	321470000	261690000		191420000	206360000	374296000	245235000	1.52627	-	0.0827626
Q12906	ILF3	sp|Q12906|ILF3_HUMAN Interleukin enhancer-binding factor 3 OS=Homo sapiens OX=9606 GN=ILF3 PE=1 SV=3	1	28	28	24	35.3	95.337	1170100000	752710000	1715000000	983260000	684020000	942470000	791770000	530850000	727420000	483610000	1061018000	695224000	1.52615	-	0.10958
O76094	SRP72	sp|O76094|SRP72_HUMAN Signal recognition particle subunit SRP72 OS=Homo sapiens OX=9606 GN=SRP72 PE=1 SV=3	1	13	13	13	21.9	74.605	85667000	64422000	101570000	185820000	77009000	73497000	72044000	91801000	55968000	43823000	102897600	67426600	1.52607	-	0.163094
P62633	CNBP	sp|P62633|CNBP_HUMAN CCHC-type zinc finger nucleic acid binding protein OS=Homo sapiens OX=9606 GN=CNBP PE=1 SV=1	1	7	7	7	45.2	19.463	138730000	95608000	198070000	147450000	63934000	152070000	87458000	60167000	43551000	78656000	128758400	84380400	1.52593	-	0.171195
P52294	KPNA1	sp|P52294|IMA5_HUMAN Importin subunit alpha-5 OS=Homo sapiens OX=9606 GN=KPNA1 PE=1 SV=3	1	10	10	4	23.8	60.221	46960000	80147000	41149000	74566000	33869000	35018000	53405000	26173000	41687000	25317000	55338200	36320000	1.52363	-	0.111669
P15927	RPA2	sp|P15927|RFA2_HUMAN Replication protein A 32 kDa subunit OS=Homo sapiens OX=9606 GN=RPA2 PE=1 SV=1	1	4	4	4	25.9	29.247	380300000	531620000	480330000	510090000	252610000	235880000	424800000	231610000	239570000		430990000	282965000	1.52312	-	0.0779818
Q13242	SRSF9	sp|Q13242|SRSF9_HUMAN Serine/arginine-rich splicing factor 9 OS=Homo sapiens OX=9606 GN=SRSF9 PE=1 SV=1	1	7	7	7	32.1	25.542	180880000	188150000	110380000	188440000	93650000	82443000	143020000		97434000	77203000	152300000	100025000	1.52262	-	0.0934867
P35244	RPA3	sp|P35244|RFA3_HUMAN Replication protein A 14 kDa subunit OS=Homo sapiens OX=9606 GN=RPA3 PE=1 SV=1	1	5	5	5	57.9	13.569	324570000	478970000	350240000	337060000	190300000	189120000	298460000	266410000	211370000	139630000	336228000	220998000	1.52141	-	0.0644192
P62829	RPL23	sp|P62829|RL23_HUMAN 60S ribosomal protein L23 OS=Homo sapiens OX=9606 GN=RPL23 PE=1 SV=1	1	9	9	9	64.3	14.865	1215100000	1206000000	761970000	1204200000	601190000	595930000	1194200000	509350000	772600000	208090000	997692000	656034000	1.52079	-	0.141034
Q9UL46	PSME2	sp|Q9UL46|PSME2_HUMAN Proteasome activator complex subunit 2 OS=Homo sapiens OX=9606 GN=PSME2 PE=1 SV=4	1	11	11	11	46.9	27.401	769530000	470770000	303880000	674940000	447250000	468650000	419060000	303280000	308680000	256910000	533274000	351316000	1.51793	-	0.0847842
Q9GZL7	WDR12	sp|Q9GZL7|WDR12_HUMAN Ribosome biogenesis protein WDR12 OS=Homo sapiens OX=9606 GN=WDR12 PE=1 SV=2	1	4	4	4	10.4	47.707	29187000	45633000	44768000	60013000	27591000	27243000	33778000		20888000		41438400	27303000	1.51772	-	0.144417
Q15424	SAFB	sp|Q15424|SAFB1_HUMAN Scaffold attachment factor B1 OS=Homo sapiens OX=9606 GN=SAFB PE=1 SV=4	1	13	5	5	21.2	102.64	47307000	36964000	25541000	49577000		25612000	21315000		34542000	23631000	39847250	26275000	1.51655	-	0.0717227
Q9BTT0	ANP32E	sp|Q9BTT0|AN32E_HUMAN Acidic leucine-rich nuclear phosphoprotein 32 family member E OS=Homo sapiens OX=9606 GN=ANP32E PE=1 SV=1	1	6	6	6	25.7	30.692	353030000	569070000	276080000	244050000	331280000	318620000	359450000	146070000	268660000	76790000	354702000	233918000	1.51635	-	0.159782
P84098	RPL19	sp|P84098|RL19_HUMAN 60S ribosomal protein L19 OS=Homo sapiens OX=9606 GN=RPL19 PE=1 SV=1	1	7	7	7	27.6	23.466	1090800000	980160000	627620000	1019400000	377610000	486050000	818090000	434310000	423270000		819118000	540430000	1.51568	-	0.155341
Q8NI27	THOC2	sp|Q8NI27|THOC2_HUMAN THO complex subunit 2 OS=Homo sapiens OX=9606 GN=THOC2 PE=1 SV=2	1	11	11	11	8	182.77	64713000	59728000	42054000	73828000	28562000	45740000	37168000		26851000	32386000	53777000	35536250	1.5133	-	0.107739
Q9BSD7	NTPCR	sp|Q9BSD7|NTPCR_HUMAN Cancer-related nucleoside-triphosphatase OS=Homo sapiens OX=9606 GN=NTPCR PE=1 SV=1	1	5	5	5	31.1	20.713	37501000	77858000	59124000	56170000		28950000	45948000		39450000		57663250	38116000	1.51284	-	0.124915
Q9H074	PAIP1	sp|Q9H074|PAIP1_HUMAN Polyadenylate-binding protein-interacting protein 1 OS=Homo sapiens OX=9606 GN=PAIP1 PE=1 SV=1	1	7	7	7	11.9	53.524	46934000	55466000	39604000	104710000	73759000	40436000	58099000		41704000	29230000	64094600	42367250	1.51283	-	0.169808
P46777	RPL5	sp|P46777|RL5_HUMAN 60S ribosomal protein L5 OS=Homo sapiens OX=9606 GN=RPL5 PE=1 SV=3	1	12	12	12	43.4	34.362	746490000	1203500000	648840000	1002300000	647860000	502580000	960020000	466410000	523500000	358520000	849798000	562206000	1.51154	-	0.0927519
Q9H3U1	UNC45A	sp|Q9H3U1|UN45A_HUMAN Protein unc-45 homolog A OS=Homo sapiens OX=9606 GN=UNC45A PE=1 SV=1	1	23	23	23	28.4	103.08	324250000	260980000	179080000	308720000	157600000	169280000	211310000	177110000	130520000	126010000	246126000	162846000	1.5114	-	0.0551613
P07437;A6NNZ2	TUBB	sp|P07437|TBB5_HUMAN Tubulin beta chain OS=Homo sapiens OX=9606 GN=TUBB PE=1 SV=2	2	20	4	3	57.9	49.67	3144000000	3105100000	1810900000	3257800000	1455300000	1572300000	3002600000	1382500000	1100500000	1396500000	2554620000	1690880000	1.51082	-	0.127823
Q969V3	NCLN	sp|Q969V3|NCLN_HUMAN BOS complex subunit NCLN OS=Homo sapiens OX=9606 GN=NCLN PE=1 SV=2	1	14	14	14	24.5	62.974	160050000	139910000	128480000	227900000	127630000	104970000	135580000	57592000	133520000	88125000	156794000	103957400	1.50825	-	0.0567477
Q07955	SRSF1	sp|Q07955|SRSF1_HUMAN Serine/arginine-rich splicing factor 1 OS=Homo sapiens OX=9606 GN=SRSF1 PE=1 SV=2	1	14	14	14	38.3	27.744	561810000	710630000	588970000	877660000	323400000	462550000	504140000	234300000	462500000	368290000	612494000	406356000	1.50728	-	0.0811625
O15498	YKT6	sp|O15498|YKT6_HUMAN Synaptobrevin homolog YKT6 OS=Homo sapiens OX=9606 GN=YKT6 PE=1 SV=1	1	7	7	7	36.9	22.417	350710000	305660000	215880000	235180000	170780000	210740000	217970000	130990000	180440000	108640000	255642000	169756000	1.50594	-	0.0577219
P10398;P04049;P15056	ARAF	sp|P10398|ARAF_HUMAN Serine/threonine-protein kinase A-Raf OS=Homo sapiens OX=9606 GN=ARAF PE=1 SV=2	3	7	7	7	12.7	67.585	67943000	101080000	74954000	139350000	59890000	52001000	66692000			58091000	88643400	58928000	1.50427	-	0.178362
Q9UQB8	BAIAP2	sp|Q9UQB8|BAIP2_HUMAN Brain-specific angiogenesis inhibitor 1-associated protein 2 OS=Homo sapiens OX=9606 GN=BAIAP2 PE=1 SV=1	1	10	10	10	23.2	60.867	84562000	164590000	32571000	178460000	42379000	31224000	158430000	24928000	53306000		100512400	66972000	1.50081	-	0.470175
O60502	OGA	sp|O60502|OGA_HUMAN Protein O-GlcNAcase OS=Homo sapiens OX=9606 GN=OGA PE=1 SV=2	1	7	7	7	11.2	102.91	28280000	40080000	28473000	63418000		24098000	34880000		21119000		40062750	26699000	1.50053	-	0.254291
P09668	CTSH	sp|P09668|CATH_HUMAN Pro-cathepsin H OS=Homo sapiens OX=9606 GN=CTSH PE=1 SV=4	1	5	5	5	12.8	37.393	86188000	169780000	64875000	311680000	90897000	77448000	157300000		54605000		144684000	96451000	1.50008	-	0.483805
P02679	FGG	sp|P02679|FIBG_HUMAN Fibrinogen gamma chain OS=Homo sapiens OX=9606 GN=FGG PE=1 SV=3	1	27	27	27	66.9	51.511	1079600000	13469000000	7773500000	2744000000	3583700000	2222700000	2388700000	6242400000	2787200000	5467800000	5729960000	3821760000	1.4993	-	0.446194
Q5T4S7	UBR4	sp|Q5T4S7|UBR4_HUMAN E3 ubiquitin-protein ligase UBR4 OS=Homo sapiens OX=9606 GN=UBR4 PE=1 SV=1	1	55	55	55	12.3	573.83	172380000	201050000	157660000	197060000	123110000	123560000	167900000	80218000	105350000	91461000	170252000	113697800	1.49741	-	0.0270621
Q8WXX5	DNAJC9	sp|Q8WXX5|DNJC9_HUMAN DnaJ homolog subfamily C member 9 OS=Homo sapiens OX=9606 GN=DNAJC9 PE=1 SV=1	1	10	10	10	43.1	29.909	112430000	172580000	139530000	203480000	80530000	122240000	106220000		106570000	44011000	141710000	94760250	1.49546	-	0.148055
Q9UJ70	NAGK	sp|Q9UJ70|NAGK_HUMAN N-acetyl-D-glucosamine kinase OS=Homo sapiens OX=9606 GN=NAGK PE=1 SV=4	1	18	18	18	57.6	37.375	846120000	795400000	500710000	476190000	444880000	379890000	681920000	315510000	410490000	261040000	612660000	409770000	1.49513	-	0.109
Q06323	PSME1	sp|Q06323|PSME1_HUMAN Proteasome activator complex subunit 1 OS=Homo sapiens OX=9606 GN=PSME1 PE=1 SV=1	1	19	19	19	72.7	28.723	1168700000	802720000	624640000	1006700000	872230000	852340000	858740000	381870000	641560000	260770000	894998000	599056000	1.49401	-	0.0880919
P62269	RPS18	sp|P62269|RS18_HUMAN 40S ribosomal protein S18 OS=Homo sapiens OX=9606 GN=RPS18 PE=1 SV=3	1	10	10	10	41.4	17.718	1625900000	2194700000	1325200000	2117300000	1450600000	1339500000	1714600000	770050000	1190000000	822150000	1742740000	1167260000	1.49302	-	0.0484841
O60341	KDM1A	sp|O60341|KDM1A_HUMAN Lysine-specific histone demethylase 1A OS=Homo sapiens OX=9606 GN=KDM1A PE=1 SV=2	1	8	8	8	11	92.902	65239000	56336000	50074000	47670000	28918000	38259000	48844000	22982000	36866000	19429000	49647400	33276000	1.49199	-	0.0767293
Q9BY43	CHMP4A	sp|Q9BY43|CHM4A_HUMAN Charged multivesicular body protein 4a OS=Homo sapiens OX=9606 GN=CHMP4A PE=1 SV=3	1	9	9	9	38.3	25.098	165820000	115600000	124640000	245760000	97263000	100310000	95290000	122330000	61132000	123100000	149816600	100432400	1.49172	-	0.124771
Q03001	DST	sp|Q03001|DYST_HUMAN Dystonin OS=Homo sapiens OX=9606 GN=DST PE=1 SV=4	1	21	20	20	3.6	860.65			42100000	102890000	41615000	37656000	16987000	82462000	29733000		6.22017e+07	41709500	1.49131	-	0.43123
Q15477	SKIC2	sp|Q15477|SKI2_HUMAN SKI2 subunit of superkiller complex protein OS=Homo sapiens OX=9606 GN=SKIC2 PE=1 SV=3	1	17	17	17	17.6	137.75	113550000	118220000	74648000	99995000	79637000	55558000	91311000	65821000	73876000	39554000	97210000	65224000	1.4904	-	0.0319394
O94776	MTA2	sp|O94776|MTA2_HUMAN Metastasis-associated protein MTA2 OS=Homo sapiens OX=9606 GN=MTA2 PE=1 SV=1	1	9	9	7	15.1	75.022	177470000	152260000	234300000	159240000	118530000	129240000	207980000	59306000	115310000	53062000	168360000	112979600	1.49018	-	0.141263
Q9UKM9	RALY	sp|Q9UKM9|RALY_HUMAN RNA-binding protein Raly OS=Homo sapiens OX=9606 GN=RALY PE=1 SV=1	1	12	12	12	37.9	32.463	515320000	628460000	277150000	445190000	147760000	330370000	367040000	199720000	298580000	155770000	402776000	270296000	1.49013	-	0.197936
P18621	RPL17	sp|P18621|RL17_HUMAN 60S ribosomal protein L17 OS=Homo sapiens OX=9606 GN=RPL17 PE=1 SV=3	1	8	8	8	42.9	21.397	2034000000	2086700000	1288600000	2167600000	1168200000	1129300000	1896500000	736790000	1338300000	768410000	1749020000	1173860000	1.48997	-	0.0934957
O43264	ZW10	sp|O43264|ZW10_HUMAN Centromere/kinetochore protein zw10 homolog OS=Homo sapiens OX=9606 GN=ZW10 PE=1 SV=3	1	8	8	8	11.3	88.828	93007000	76372000	62722000	63387000	83271000	53848000	55988000		42693000		75751800	50843000	1.48992	-	0.0242298
P40429;Q6NVV1	RPL13A	sp|P40429|RL13A_HUMAN 60S ribosomal protein L13a OS=Homo sapiens OX=9606 GN=RPL13A PE=1 SV=2	2	8	8	8	37.4	23.577	366700000	475190000	276710000	462990000	292540000	300660000	446750000	104530000	251140000	155590000	374826000	251734000	1.48898	-	0.128791
P47813;O14602	EIF1AX; EIF1AY	sp|P47813|IF1AX_HUMAN Eukaryotic translation initiation factor 1A, X-chromosomal OS=Homo sapiens OX=9606 GN=EIF1AX PE=1 SV=2;sp|O14602|IF1AY_HUMAN Eukaryotic translation initiation factor 1A, Y-chromosomal OS=Homo sapiens OX=9606 GN=EIF1AY PE=1 SV=4	2	6	6	6	30.6	16.46	222700000	206440000	143040000	338720000	88352000	118810000	163710000		136130000	118380000	199850400	134257500	1.48856	-	0.219871
P61019	RAB2A	sp|P61019|RAB2A_HUMAN Ras-related protein Rab-2A OS=Homo sapiens OX=9606 GN=RAB2A PE=1 SV=1	1	11	11	4	53.8	23.545	633400000	561840000	446310000	589600000	370800000	394260000	590820000	245920000	316630000	200880000	520390000	349702000	1.4881	-	0.0767562
P25788	PSMA3	sp|P25788|PSA3_HUMAN Proteasome subunit alpha type-3 OS=Homo sapiens OX=9606 GN=PSMA3 PE=1 SV=2	1	10	10	10	35.3	28.433	451420000	532770000	449830000	675750000	381590000	350350000	408520000	276440000	400970000	238230000	498272000	334902000	1.48781	-	0.0273904
P29966	MARCKS	sp|P29966|MARCS_HUMAN Myristoylated alanine-rich C-kinase substrate OS=Homo sapiens OX=9606 GN=MARCKS PE=1 SV=4	1	8	8	8	38.3	31.554	622660000	518450000	661770000	602240000	469110000	450290000	404190000	481830000	328140000	268360000	574846000	386562000	1.48707	-	0.00734638
P16333	NCK1	sp|P16333|NCK1_HUMAN Cytoplasmic protein NCK1 OS=Homo sapiens OX=9606 GN=NCK1 PE=1 SV=1	1	10	10	9	27.3	42.864	26597000	98499000	42393000	41532000	32852000	31662000	44928000		21055000		48374600	3.25483e+07	1.48624	-	0.410139
P26583	HMGB2	sp|P26583|HMGB2_HUMAN High mobility group protein B2 OS=Homo sapiens OX=9606 GN=HMGB2 PE=1 SV=2	1	11	9	9	41.6	24.033	219900000	915140000	677220000	282340000	126350000	451680000	498820000	97967000	214610000	231990000	444190000	299013400	1.48552	-	0.414404
P62854;Q5JNZ5	RPS26; RPS26P11	sp|P62854|RS26_HUMAN 40S ribosomal protein S26 OS=Homo sapiens OX=9606 GN=RPS26 PE=1 SV=3;sp|Q5JNZ5|RS26L_HUMAN Putative 40S ribosomal protein S26-like 1 OS=Homo sapiens OX=9606 GN=RPS26P11 PE=5 SV=1	2	3	3	3	29.6	13.015	373800000	353130000	365110000	431270000	152590000	293900000	243270000	140670000	305950000	144410000	335180000	225640000	1.48546	-	0.102301
O00422	SAP18	sp|O00422|SAP18_HUMAN Histone deacetylase complex subunit SAP18 OS=Homo sapiens OX=9606 GN=SAP18 PE=1 SV=1	1	6	6	6	39.2	17.561	228410000	241460000	272100000	329250000	174830000	187090000	183130000	104370000	172860000	191390000	249210000	167768000	1.48544	-	0.026984
Q7L0Y3	TRMT10C	sp|Q7L0Y3|TM10C_HUMAN tRNA methyltransferase 10 homolog C OS=Homo sapiens OX=9606 GN=TRMT10C PE=1 SV=2	1	10	10	10	27.3	47.346	75110000	115150000	149770000	52144000	41588000	50790000	86303000		38113000		86752400	58402000	1.48544	-	0.36455
Q92769	HDAC2	sp|Q92769|HDAC2_HUMAN Histone deacetylase 2 OS=Homo sapiens OX=9606 GN=HDAC2 PE=1 SV=2	1	10	5	5	25.2	55.364	68931000	58441000	88151000	60946000	54458000	58249000	44788000	34195000	54663000	31020000	66185400	44583000	1.48454	-	0.0277385
P62241	RPS8	sp|P62241|RS8_HUMAN 40S ribosomal protein S8 OS=Homo sapiens OX=9606 GN=RPS8 PE=1 SV=2	1	13	13	13	60.1	24.205	658600000	741190000	470850000	634900000	400230000	405820000	730950000	244760000	369070000	206890000	581154000	391498000	1.48444	-	0.128885
Q9Y316	MEMO1	sp|Q9Y316|MEMO1_HUMAN Protein MEMO1 OS=Homo sapiens OX=9606 GN=MEMO1 PE=1 SV=1	1	4	4	4	22.2	33.733	62172000	49044000	28153000	75014000	39807000		52591000		18834000	31321000	50838000	3.42487e+07	1.48438	-	0.252814
Q04828;P17516	AKR1C1	sp|Q04828|AK1C1_HUMAN Aldo-keto reductase family 1 member C1 OS=Homo sapiens OX=9606 GN=AKR1C1 PE=1 SV=1	2	9	9	0	31.9	36.788	190360000	123650000	48223000	141190000	92593000	100780000	79869000	43209000		97441000	119203200	80324750	1.48402	-	0.226926
Q96CG8	CTHRC1	sp|Q96CG8|CTHR1_HUMAN Collagen triple helix repeat-containing protein 1 OS=Homo sapiens OX=9606 GN=CTHRC1 PE=1 SV=1	1	3	3	3	11.5	26.224	134500000	78059000	97424000			41262000	120340000			47535000	1.03328e+08	6.97123e+07	1.4822	-	0.329491
P21281;P15313	ATP6V1B2	sp|P21281|VATB2_HUMAN V-type proton ATPase subunit B, brain isoform OS=Homo sapiens OX=9606 GN=ATP6V1B2 PE=1 SV=3	2	14	14	14	33.5	56.5	551430000	334300000	235080000	311820000	269590000	252550000	232120000	183300000	317400000	163680000	340444000	229810000	1.48142	-	0.110888
Q14498	RBM39	sp|Q14498|RBM39_HUMAN RNA-binding protein 39 OS=Homo sapiens OX=9606 GN=RBM39 PE=1 SV=2	1	11	11	9	24.9	59.379	187640000	221870000	166190000	178690000	146990000	129420000	142110000		123890000	91358000	180276000	121694500	1.48138	-	0.0107455
P83111	LACTB	sp|P83111|LACTB_HUMAN Serine beta-lactamase-like protein LACTB, mitochondrial OS=Homo sapiens OX=9606 GN=LACTB PE=1 SV=2	1	11	11	11	27.4	60.693	52253000	44267000	46494000	79912000	34465000	27458000	57414000		34413000	19724000	51478200	34752250	1.48129	-	0.18061
P51649	ALDH5A1	sp|P51649|SSDH_HUMAN Succinate-semialdehyde dehydrogenase, mitochondrial OS=Homo sapiens OX=9606 GN=ALDH5A1 PE=1 SV=2	1	7	7	7	14.4	57.214	118330000	72088000	34911000	88201000	43319000	35925000	86377000	46890000	47334000	24402000	71369800	48185600	1.48114	-	0.243525
O00303	EIF3F	sp|O00303|EIF3F_HUMAN Eukaryotic translation initiation factor 3 subunit F OS=Homo sapiens OX=9606 GN=EIF3F PE=1 SV=1	1	9	9	9	33.9	37.563	322680000	357340000	271540000	356200000	235670000	175480000	241670000	195140000	248500000	181470000	308686000	208452000	1.48085	-	0.00786372
Q7Z6Z7	HUWE1	sp|Q7Z6Z7|HUWE1_HUMAN E3 ubiquitin-protein ligase HUWE1 OS=Homo sapiens OX=9606 GN=HUWE1 PE=1 SV=3	1	64	64	64	17.3	481.89	963700000	787090000	477260000	1070400000	508300000	668390000	661980000	402140000	582300000	257780000	761350000	514518000	1.47973	-	0.123171
O15042	U2SURP	sp|O15042|SR140_HUMAN U2 snRNP-associated SURP motif-containing protein OS=Homo sapiens OX=9606 GN=U2SURP PE=1 SV=2	1	12	12	12	12.3	118.29	102890000	134360000	87749000	141780000	101870000	80614000	102580000		64866000	59386000	113729800	76861500	1.47967	-	0.0385114
Q53GS9	USP39	sp|Q53GS9|SNUT2_HUMAN U4/U6.U5 tri-snRNP-associated protein 2 OS=Homo sapiens OX=9606 GN=USP39 PE=1 SV=2	1	9	9	9	23	65.38	130560000	127640000	145440000	124850000	78983000	81106000	98459000	45257000	131220000	54528000	121494600	82114000	1.47958	-	0.0733887
O15212	PFDN6	sp|O15212|PFD6_HUMAN Prefoldin subunit 6 OS=Homo sapiens OX=9606 GN=PFDN6 PE=1 SV=1	1	7	7	7	45.7	14.582	334410000	443250000	269450000	422500000	222830000	306630000	252410000	185520000	228560000	170930000	338488000	228810000	1.47934	-	0.0555902
Q9BUF5	TUBB6	sp|Q9BUF5|TBB6_HUMAN Tubulin beta-6 chain OS=Homo sapiens OX=9606 GN=TUBB6 PE=1 SV=1	1	19	11	9	61.7	49.857	381060000	117060000	225980000	370290000	124910000	103740000	192190000	231230000	123040000	174070000	243860000	164854000	1.47925	-	0.236078
Q9H4A6	GOLPH3	sp|Q9H4A6|GOLP3_HUMAN Golgi phosphoprotein 3 OS=Homo sapiens OX=9606 GN=GOLPH3 PE=1 SV=1	1	6	6	6	29.2	33.81	28924000	30569000	25046000	56026000	31362000	21227000	27578000		23826000	20367000	34385400	23249500	1.47897	-	0.126256
O95817	BAG3	sp|O95817|BAG3_HUMAN BAG family molecular chaperone regulator 3 OS=Homo sapiens OX=9606 GN=BAG3 PE=1 SV=3	1	15	15	15	33.7	61.594	70979000	96542000	101040000	69540000	21916000	33799000	97308000	48636000	26814000	37026000	72003400	48716600	1.47801	-	0.25341
P59998	ARPC4	sp|P59998|ARPC4_HUMAN Actin-related protein 2/3 complex subunit 4 OS=Homo sapiens OX=9606 GN=ARPC4 PE=1 SV=3	1	8	8	8	53	19.667	1262900000	1303700000	1010000000	903410000	767440000	618560000	969880000	771790000	521070000	669190000	1049490000	710098000	1.47795	-	0.0295575
O15269	SPTLC1	sp|O15269|SPTC1_HUMAN Serine palmitoyltransferase 1 OS=Homo sapiens OX=9606 GN=SPTLC1 PE=1 SV=1	1	9	9	9	23.3	52.743	149150000	91378000	123120000	244220000	107670000	97933000	121160000		115200000	53290000	143107600	96895750	1.47692	-	0.209751
P14324	FDPS	sp|P14324|FPPS_HUMAN Farnesyl pyrophosphate synthase OS=Homo sapiens OX=9606 GN=FDPS PE=1 SV=4	1	11	11	11	31	48.275	157330000	298560000	186940000	291830000	154990000	180910000	173580000	111630000	211020000	61030000	217930000	147634000	1.47615	-	0.132111
O00567	NOP56	sp|O00567|NOP56_HUMAN Nucleolar protein 56 OS=Homo sapiens OX=9606 GN=NOP56 PE=1 SV=4	1	21	21	21	39.6	66.049	277270000	271410000	301130000	303110000	180410000	226160000	210660000	95471000	202010000	169320000	266666000	180724200	1.47554	-	0.0288779
Q9ULC4;A0A3B3IRV3	MCTS1; MCTS2	sp|Q9ULC4|MCTS1_HUMAN Malignant T-cell-amplified sequence 1 OS=Homo sapiens OX=9606 GN=MCTS1 PE=1 SV=1;sp|A0A3B3IRV3|MCTS2_HUMAN Malignant T-cell-amplified sequence 2 OS=Homo sapiens OX=9606 GN=MCTS2 PE=3 SV=1	2	8	8	8	50.3	20.555	200650000	166300000	137890000	178630000	124580000	95365000	172270000	127150000	69601000	83247000	161610000	109526600	1.47553	-	0.0526542
P05388;Q8NHW5	RPLP0; RPLP0P6	sp|P05388|RLA0_HUMAN 60S acidic ribosomal protein P0 OS=Homo sapiens OX=9606 GN=RPLP0 PE=1 SV=1;sp|Q8NHW5|RLA0L_HUMAN 60S acidic ribosomal protein P0-like OS=Homo sapiens OX=9606 GN=RPLP0P6 PE=5 SV=1	2	11	11	11	34.7	34.273	692720000	738030000	492880000	536530000	443910000	393760000	551940000	259130000	434970000	328640000	580814000	393688000	1.47532	-	0.0386916
Q9Y5R8	TRAPPC1	sp|Q9Y5R8|TPPC1_HUMAN Trafficking protein particle complex subunit 1 OS=Homo sapiens OX=9606 GN=TRAPPC1 PE=1 SV=1	1	4	4	4	31	16.831	47132000	37338000	17432000	27078000	25962000	16369000	27708000		22720000	17227000	30988400	21006000	1.47522	-	0.154625
Q13442	PDAP1	sp|Q13442|HAP28_HUMAN 28 kDa heat- and acid-stable phosphoprotein OS=Homo sapiens OX=9606 GN=PDAP1 PE=1 SV=1	1	4	4	4	23.8	20.63	100680000	95228000	66500000	66031000		48704000	67767000		50528000		82109750	5.56663e+07	1.47503	-	0.0792786
P43246	MSH2	sp|P43246|MSH2_HUMAN DNA mismatch repair protein Msh2 OS=Homo sapiens OX=9606 GN=MSH2 PE=1 SV=1	1	21	21	21	24.1	104.74	73064000	163250000	141430000	162340000	59443000	65275000	122880000		56234000		119905400	81463000	1.4719	-	0.294522
Q8N684	CPSF7	sp|Q8N684|CPSF7_HUMAN Cleavage and polyadenylation specificity factor subunit 7 OS=Homo sapiens OX=9606 GN=CPSF7 PE=1 SV=1	1	7	7	7	20	52.049	103940000		99488000	201680000	80761000	87797000	112770000	60150000	95089000	56949000	121467250	82551000	1.47142	-	0.189146
P08579	SNRPB2	sp|P08579|RU2B_HUMAN U2 small nuclear ribonucleoprotein B OS=Homo sapiens OX=9606 GN=SNRPB2 PE=1 SV=1	1	5	5	5	23.1	25.486	102590000	77615000		72181000	42520000	47714000	33670000	60205000	65707000	43427000	73726500	50144600	1.47028	-	0.104629
P42785	PRCP	sp|P42785|PCP_HUMAN Lysosomal Pro-X carboxypeptidase OS=Homo sapiens OX=9606 GN=PRCP PE=1 SV=1	1	8	8	8	20.4	55.799	116970000	76185000	56516000		217930000	75344000	84433000	94030000	60621000	83145000	116900250	79514600	1.47017	-	0.283747
P46063	RECQL	sp|P46063|RECQ1_HUMAN ATP-dependent DNA helicase Q1 OS=Homo sapiens OX=9606 GN=RECQL PE=1 SV=3	1	16	16	16	30.4	73.457	262850000	257770000	354720000	224780000	205000000	190740000	246780000	147390000	159550000	143800000	261024000	177652000	1.4693	-	0.0316794
P31153;Q00266	MAT2A	sp|P31153|METK2_HUMAN S-adenosylmethionine synthase isoform type-2 OS=Homo sapiens OX=9606 GN=MAT2A PE=1 SV=1	2	10	10	10	32.4	43.66	338390000	354210000	299370000	446050000	245580000	296670000	323400000	125950000	257240000	142650000	336720000	229182000	1.46923	-	0.0729809
P51665	PSMD7	sp|P51665|PSMD7_HUMAN 26S proteasome non-ATPase regulatory subunit 7 OS=Homo sapiens OX=9606 GN=PSMD7 PE=1 SV=2	1	11	11	11	46	37.025	226190000	187980000	165550000	241920000	92721000	144240000	146010000	79450000	128210000		182872200	124477500	1.46912	-	0.118025
Q8IWB1	ITPRIP	sp|Q8IWB1|IPRI_HUMAN Inositol 1,4,5-trisphosphate receptor-interacting protein OS=Homo sapiens OX=9606 GN=ITPRIP PE=1 SV=1	1	9	9	9	19	62.059	79369000	98561000	54586000	53234000	50984000	37642000	61534000		36288000	47914000	67346800	45844500	1.46903	-	0.110636
Q96LJ7	DHRS1	sp|Q96LJ7|DHRS1_HUMAN Dehydrogenase/reductase SDR family member 1 OS=Homo sapiens OX=9606 GN=DHRS1 PE=1 SV=1	1	10	10	10	42.8	33.909	77138000	72413000	105640000	120990000	75411000	35147000	93202000		76333000	41250000	90318400	61483000	1.469	-	0.123527
Q9Y230	RUVBL2	sp|Q9Y230|RUVB2_HUMAN RuvB-like 2 OS=Homo sapiens OX=9606 GN=RUVBL2 PE=1 SV=3	1	22	22	22	54	51.156	101530000	167740000	97369000	112690000	74909000	89361000	110590000	47787000	73254000	56435000	110847600	75485400	1.46846	-	0.102516
Q00610	CLTC	sp|Q00610|CLH1_HUMAN Clathrin heavy chain 1 OS=Homo sapiens OX=9606 GN=CLTC PE=1 SV=5	1	70	70	55	49.9	191.61	1697600000	1844400000	1602600000	2348700000	1508200000	1153400000	1653100000	1113900000	1330000000	880200000	1800300000	1226120000	1.46829	-	0.0190112
O00151	PDLIM1	sp|O00151|PDLI1_HUMAN PDZ and LIM domain protein 1 OS=Homo sapiens OX=9606 GN=PDLIM1 PE=1 SV=4	1	16	16	16	69	36.071	213070000	192670000	355880000	201860000	254520000	160320000	159500000	187420000	148570000	173780000	243600000	165918000	1.4682	-	0.0353907
P26373	RPL13	sp|P26373|RL13_HUMAN 60S ribosomal protein L13 OS=Homo sapiens OX=9606 GN=RPL13 PE=1 SV=4	1	11	11	11	47.9	24.261	803740000	1018600000	562680000	1000000000	587160000	626140000	826870000	406330000	636730000	210070000	794436000	541228000	1.46784	-	0.116858
Q2NL82	TSR1	sp|Q2NL82|TSR1_HUMAN Pre-rRNA-processing protein TSR1 homolog OS=Homo sapiens OX=9606 GN=TSR1 PE=1 SV=1	1	10	10	10	15.7	91.809	25193000	29636000	30124000	32466000	10402000	14975000	22443000		14831000		25564200	1.74163e+07	1.46783	-	0.195996
P60900	PSMA6	sp|P60900|PSA6_HUMAN Proteasome subunit alpha type-6 OS=Homo sapiens OX=9606 GN=PSMA6 PE=1 SV=1	1	13	13	13	54.5	27.399	758520000	620340000	589810000	900590000	637820000	475490000	693470000	429050000	512250000	279070000	701416000	477866000	1.46781	-	0.035003
Q01130;Q9BRL6	SRSF2	sp|Q01130|SRSF2_HUMAN Serine/arginine-rich splicing factor 2 OS=Homo sapiens OX=9606 GN=SRSF2 PE=1 SV=4	2	5	5	5	22.6	25.476	142500000	237920000	222120000	264670000	65755000	130030000	115540000	101220000	218270000	70594000	186593000	127130800	1.46772	-	0.214257
P63241;Q6IS14;Q9GZV4	EIF5A; EIF5AL1	sp|P63241|IF5A1_HUMAN Eukaryotic translation initiation factor 5A-1 OS=Homo sapiens OX=9606 GN=EIF5A PE=1 SV=2;sp|Q6IS14|IF5AL_HUMAN Eukaryotic translation initiation factor 5A-1-like OS=Homo sapiens OX=9606 GN=EIF5AL1 PE=2 SV=2	3	11	11	11	66.9	16.832	941800000	1025600000	774710000	1350100000	583540000	658040000	1018700000	543120000	572750000	394020000	935150000	637326000	1.4673	-	0.109655
P62249	RPS16	sp|P62249|RS16_HUMAN 40S ribosomal protein S16 OS=Homo sapiens OX=9606 GN=RPS16 PE=1 SV=2	1	11	11	11	64.4	16.445	2180800000	2444600000	1451000000	2179800000	1652900000	1604500000	1967400000	915920000	1209800000	1056800000	1981820000	1350884000	1.46705	-	0.0455697
P53999	SUB1	sp|P53999|TCP4_HUMAN Activated RNA polymerase II transcriptional coactivator p15 OS=Homo sapiens OX=9606 GN=SUB1 PE=1 SV=3	1	6	6	6	42.5	14.395	617930000	703720000	552690000	679790000	792790000	449810000	700570000	409300000	367810000	354230000	669384000	456344000	1.46684	-	0.0219844
Q9UHD2	TBK1	sp|Q9UHD2|TBK1_HUMAN Serine/threonine-protein kinase TBK1 OS=Homo sapiens OX=9606 GN=TBK1 PE=1 SV=1	1	12	12	11	19.3	83.641	84071000	78187000	69645000	123620000	66579000	55937000	79685000	45395000	59209000	47545000	84420400	57554200	1.4668	-	0.0546964
P53582	METAP1	sp|P53582|MAP11_HUMAN Methionine aminopeptidase 1 OS=Homo sapiens OX=9606 GN=METAP1 PE=1 SV=2	1	13	13	13	49.5	43.215	117960000	146140000	111130000	121040000	65709000	58175000	174960000	50927000	60440000	38688000	112395800	76638000	1.46658	-	0.238995
P14868	DARS1	sp|P14868|SYDC_HUMAN Aspartate--tRNA ligase, cytoplasmic OS=Homo sapiens OX=9606 GN=DARS1 PE=1 SV=2	1	26	26	26	56.1	57.136	845520000	597140000	620650000	869150000	581720000	538900000	609510000	354240000	469930000	424310000	702836000	479378000	1.46614	-	0.0203123
Q13200	PSMD2	sp|Q13200|PSMD2_HUMAN 26S proteasome non-ATPase regulatory subunit 2 OS=Homo sapiens OX=9606 GN=PSMD2 PE=1 SV=3	1	28	28	28	38.1	100.2	225550000	263280000	196040000	263380000	160000000	151920000	204630000	149080000	151970000	98482000	221650000	151216400	1.46578	-	0.026973
P22392;O60361	NME2; NME2P1	sp|P22392|NDKB_HUMAN Nucleoside diphosphate kinase B OS=Homo sapiens OX=9606 GN=NME2 PE=1 SV=1;sp|O60361|NDK8_HUMAN Putative nucleoside diphosphate kinase OS=Homo sapiens OX=9606 GN=NME2P1 PE=5 SV=1	2	9	9	4	55.9	17.298	1981300000	2084100000	1468400000	2804300000	1672200000	1581400000	1987900000	985880000	1395200000	883640000	2002060000	1366804000	1.46477	-	0.0704988
Q9BU23	LMF2	sp|Q9BU23|LMF2_HUMAN Lipase maturation factor 2 OS=Homo sapiens OX=9606 GN=LMF2 PE=1 SV=2	1	6	6	6	10.5	79.697	88963000	99817000	34077000	137830000	57659000	60710000	93499000	38492000	48846000	44115000	83669200	57132400	1.46448	-	0.228406
P63220	RPS21	sp|P63220|RS21_HUMAN 40S ribosomal protein S21 OS=Homo sapiens OX=9606 GN=RPS21 PE=1 SV=1	1	6	6	6	63.9	9.1113	219560000	457020000	270720000	366120000	335680000	240550000	354870000	131930000	270610000	128260000	329820000	225244000	1.46428	-	0.115961
P63218;A0A804HLA8	GNG5	sp|P63218|GBG5_HUMAN Guanine nucleotide-binding protein G(I)/G(S)/G(O) subunit gamma-5 OS=Homo sapiens OX=9606 GN=GNG5 PE=1 SV=3	2	3	3	3	33.8	7.3184	1134800000	828840000	472990000	1098200000	397030000	416380000	686050000	476410000	755650000	352020000	786372000	537302000	1.46356	-	0.185962
Q9NRW3	APOBEC3C	sp|Q9NRW3|ABC3C_HUMAN DNA dC->dU-editing enzyme APOBEC-3C OS=Homo sapiens OX=9606 GN=APOBEC3C PE=1 SV=2	1	4	4	3	30	22.826	77424000	105200000	44362000	73781000	50610000	39649000	80178000	27587000	58226000	34706000	70275400	48069200	1.46196	-	0.161501
Q13619	CUL4A	sp|Q13619|CUL4A_HUMAN Cullin-4A OS=Homo sapiens OX=9606 GN=CUL4A PE=1 SV=3	1	15	7	7	22.4	87.679	55072000	33536000	36805000	33310000	23732000	33558000	21116000	25481000	19689000		36491000	24961000	1.46192	-	0.116185
Q92974	ARHGEF2	sp|Q92974|ARHG2_HUMAN Rho guanine nucleotide exchange factor 2 OS=Homo sapiens OX=9606 GN=ARHGEF2 PE=1 SV=4	1	14	14	14	14.4	111.54	91038000	78023000	65716000	84253000	57338000	48561000	73268000	52254000	42904000	40592000	75273600	51515800	1.46118	-	0.0227054
Q96FW1	OTUB1	sp|Q96FW1|OTUB1_HUMAN Ubiquitin thioesterase OTUB1 OS=Homo sapiens OX=9606 GN=OTUB1 PE=1 SV=2	1	8	8	8	32.5	31.284	371290000	318440000	348500000	487900000	413540000	373000000	254680000	202330000	269600000	228610000	387934000	265644000	1.46035	-	0.0184047
Q6NUQ4	TMEM214	sp|Q6NUQ4|TM214_HUMAN Transmembrane protein 214 OS=Homo sapiens OX=9606 GN=TMEM214 PE=1 SV=2	1	9	9	9	14.2	77.15	117060000	116360000	95940000	141060000	130120000	94641000	97458000	80577000	90159000	48735000	120108000	82314000	1.45914	-	0.0118639
O00478;P78410	BTN3A3; BTN3A2	sp|O00478|BT3A3_HUMAN Butyrophilin subfamily 3 member A3 OS=Homo sapiens OX=9606 GN=BTN3A3 PE=1 SV=1;sp|P78410|BT3A2_HUMAN Butyrophilin subfamily 3 member A2 OS=Homo sapiens OX=9606 GN=BTN3A2 PE=1 SV=2	2	6	6	3	11	65.001	57126000	42371000	33684000	82234000	61370000	41181000	33352000	18819000	48158000	48191000	55357000	37940200	1.45906	-	0.120267
Q9Y2V2	CARHSP1	sp|Q9Y2V2|CHSP1_HUMAN Calcium-regulated heat-stable protein 1 OS=Homo sapiens OX=9606 GN=CARHSP1 PE=1 SV=2	1	5	5	5	53.1	15.892	2357200000	1991100000	1136900000	2028400000	1453000000	1851100000	1321700000	756240000	985600000	1234200000	1793320000	1229768000	1.45826	-	0.084401
P55327	TPD52	sp|P55327|TPD52_HUMAN Tumor protein D52 OS=Homo sapiens OX=9606 GN=TPD52 PE=1 SV=2	1	8	8	8	34.4	24.327	199400000	120280000	85657000	92719000	89789000	58700000	106310000		76887000		117569000	8.06323e+07	1.45809	-	0.267268
P25786	PSMA1	sp|P25786|PSA1_HUMAN Proteasome subunit alpha type-1 OS=Homo sapiens OX=9606 GN=PSMA1 PE=1 SV=1	1	15	15	15	79.1	29.555	1087500000	1334200000	978500000	1772300000	1150100000	749820000	1040800000	748930000	1135700000	662220000	1264520000	867494000	1.45767	-	0.0451977
O75369	FLNB	sp|O75369|FLNB_HUMAN Filamin-B OS=Homo sapiens OX=9606 GN=FLNB PE=1 SV=2	1	106	95	91	47.8	278.16	1142900000	481790000	696770000	682110000	549450000	631050000	534660000	384810000	552580000	334880000	710604000	487596000	1.45736	-	0.119361
P49770	EIF2B2	sp|P49770|EI2BB_HUMAN Translation initiation factor eIF-2B subunit beta OS=Homo sapiens OX=9606 GN=EIF2B2 PE=1 SV=3	1	6	6	6	19.1	38.989	72550000	113040000	107630000	137850000	74373000	70724000	89513000			47989000	101088600	6.94087e+07	1.45643	-	0.14101
P62750	RPL23A	sp|P62750|RL23A_HUMAN 60S ribosomal protein L23a OS=Homo sapiens OX=9606 GN=RPL23A PE=1 SV=1	1	9	9	9	44.2	17.695	848440000	908400000	586320000	920540000	468990000	498050000	792890000	524950000	516990000	231080000	746538000	512792000	1.45583	-	0.105294
Q9BRX8	PRXL2A	sp|Q9BRX8|PXL2A_HUMAN Peroxiredoxin-like 2A OS=Homo sapiens OX=9606 GN=PRXL2A PE=1 SV=3	1	10	10	10	42.4	25.764	531900000	753430000	203400000	236460000	223430000	263100000	542000000	130240000	274600000	128630000	389724000	267714000	1.45575	-	0.384566
P61160	ACTR2	sp|P61160|ARP2_HUMAN Actin-related protein 2 OS=Homo sapiens OX=9606 GN=ACTR2 PE=1 SV=1	1	16	16	16	47.2	44.76	1245000000	1094200000	844610000	751630000	1055300000	658100000	1025800000	767920000	522040000	456160000	998148000	686004000	1.45502	-	0.0485257
Q96C19	EFHD2	sp|Q96C19|EFHD2_HUMAN EF-hand domain-containing protein D2 OS=Homo sapiens OX=9606 GN=EFHD2 PE=1 SV=1	1	9	9	7	35.8	26.697	844570000	1484000000	732020000	2044000000	767120000	872520000	1559300000	557490000	426620000	624170000	1174342000	808020000	1.45336	-	0.294525
Q9UBB9	TFIP11	sp|Q9UBB9|TFP11_HUMAN Tuftelin-interacting protein 11 OS=Homo sapiens OX=9606 GN=TFIP11 PE=1 SV=1	1	5	5	5	6.8	96.819	32487000	42822000	25681000	22156000		16915000	25662000		20984000		30786500	21187000	1.45308	-	0.157794
P10599	TXN	sp|P10599|THIO_HUMAN Thioredoxin OS=Homo sapiens OX=9606 GN=TXN PE=1 SV=3	1	9	9	9	86.7	11.737	1809100000	1946400000	1677400000	2693100000	1944500000	1287800000	2161200000	686950000	1839000000	957360000	2014100000	1386462000	1.45269	-	0.0896534
Q92552	MRPS27	sp|Q92552|RT27_HUMAN 28S ribosomal protein S27, mitochondrial OS=Homo sapiens OX=9606 GN=MRPS27 PE=1 SV=3	1	7	7	7	17.4	47.611	73800000	102490000	86238000	71555000	41592000	33539000	98583000		53902000	20879000	75135000	51725750	1.45256	-	0.252975
O14936	CASK	sp|O14936|CSKP_HUMAN Peripheral plasma membrane protein CASK OS=Homo sapiens OX=9606 GN=CASK PE=1 SV=3	1	21	21	21	26.1	105.12	195230000	152320000	60903000	53443000	51370000	62711000	178880000	41583000	51631000	18638000	102653200	70688600	1.45219	-	0.457411
P46782	RPS5	sp|P46782|RS5_HUMAN 40S ribosomal protein S5 OS=Homo sapiens OX=9606 GN=RPS5 PE=1 SV=4	1	10	10	10	54.4	22.876	558750000	776000000	523860000	654490000	400790000	333960000	634850000		434220000	202770000	582778000	401450000	1.45168	-	0.135009
Q99733	NAP1L4	sp|Q99733|NP1L4_HUMAN Nucleosome assembly protein 1-like 4 OS=Homo sapiens OX=9606 GN=NAP1L4 PE=1 SV=1	1	7	7	6	25.3	42.823	553200000	471240000	431860000	667450000	221380000	323540000	417300000	306080000	312090000	256920000	469026000	323186000	1.45126	-	0.0997895
P39656	DDOST	sp|P39656|OST48_HUMAN Dolichyl-diphosphooligosaccharide--protein glycosyltransferase 48 kDa subunit OS=Homo sapiens OX=9606 GN=DDOST PE=1 SV=4	1	12	12	12	33.8	50.8	705320000	640110000	504590000	619020000	656920000	464780000	475420000	298660000	528550000	386830000	625192000	430848000	1.45107	-	0.00579724
Q9Y2R0	COA3	sp|Q9Y2R0|COA3_HUMAN Cytochrome c oxidase assembly factor 3 homolog, mitochondrial OS=Homo sapiens OX=9606 GN=COA3 PE=1 SV=1	1	6	6	6	47.2	11.731	74894000	203900000	121600000	185990000	79082000	36813000	118900000	112220000	98950000		133093200	91720750	1.45107	-	0.26898
O14737	PDCD5	sp|O14737|PDCD5_HUMAN Programmed cell death protein 5 OS=Homo sapiens OX=9606 GN=PDCD5 PE=1 SV=3	1	8	8	8	66.4	14.285	195600000	144700000	84700000	129940000	65600000	104800000	97836000		78333000	61243000	124108000	85553000	1.45066	-	0.202744
Q15046	KARS1	sp|Q15046|SYK_HUMAN Lysine--tRNA ligase OS=Homo sapiens OX=9606 GN=KARS1 PE=1 SV=3	1	24	24	24	41.4	68.047	349070000	410970000	182260000	450170000	195670000	251380000	284240000	168550000	229860000	161100000	317628000	219026000	1.45018	-	0.138423
P25685	DNAJB1	sp|P25685|DNJB1_HUMAN DnaJ homolog subfamily B member 1 OS=Homo sapiens OX=9606 GN=DNAJB1 PE=1 SV=4	1	9	9	8	25	38.044	208260000	180920000	112480000	204260000	116810000	117650000	177020000	87839000	117940000	67110000	164546000	113511800	1.44959	-	0.105333
P42704	LRPPRC	sp|P42704|LPPRC_HUMAN Leucine-rich PPR motif-containing protein, mitochondrial OS=Homo sapiens OX=9606 GN=LRPPRC PE=1 SV=3	1	55	55	54	44.7	157.9	313340000	443730000	782490000	550730000	306010000	374680000	375480000	239920000	384580000	280830000	479260000	331098000	1.44749	-	0.150262
P41252	IARS1	sp|P41252|SYIC_HUMAN Isoleucine--tRNA ligase, cytoplasmic OS=Homo sapiens OX=9606 GN=IARS1 PE=1 SV=2	1	26	26	26	25	144.5	115970000	133140000	120820000	74171000	88839000	84658000	105240000	81797000	44353000	52257000	106588000	73661000	1.44701	-	0.067701
Q9HCU5	PREB	sp|Q9HCU5|PREB_HUMAN Prolactin regulatory element-binding protein OS=Homo sapiens OX=9606 GN=PREB PE=1 SV=2	1	7	7	7	27.1	45.468	47667000	72625000	56904000	57320000	48965000	33138000	44634000		39838000		56696200	3.92033e+07	1.44621	-	0.034218
P18858	LIG1	sp|P18858|DNLI1_HUMAN DNA ligase 1 OS=Homo sapiens OX=9606 GN=LIG1 PE=1 SV=1	1	8	8	8	11.9	101.73	84473000	126950000	79050000	63882000	27003000	30754000	91236000		36244000		76271600	5.27447e+07	1.44605	-	0.396186
P10253	GAA	sp|P10253|LYAG_HUMAN Lysosomal alpha-glucosidase OS=Homo sapiens OX=9606 GN=GAA PE=1 SV=4	1	17	17	17	24.2	105.32	173170000	236360000	143950000	223900000	62992000	136500000	232610000	96070000	90971000	25104000	168074400	116251000	1.44579	-	0.294753
Q9H9A6	LRRC40	sp|Q9H9A6|LRC40_HUMAN Leucine-rich repeat-containing protein 40 OS=Homo sapiens OX=9606 GN=LRRC40 PE=1 SV=1	1	10	10	10	17.1	68.249	106570000	112770000	126390000	107720000	105740000	77721000	67016000	104550000	79216000	58654000	111838000	77431400	1.44435	-	0.00405872
Q9BUL8	PDCD10	sp|Q9BUL8|PDC10_HUMAN Programmed cell death protein 10 OS=Homo sapiens OX=9606 GN=PDCD10 PE=1 SV=1	1	6	6	6	35.8	24.701	144120000	153540000	147010000	105760000	83347000	85398000	116090000		87127000	62431000	126755400	87761500	1.44432	-	0.070479
Q8N0X4	CLYBL	sp|Q8N0X4|CLYBL_HUMAN Citramalyl-CoA lyase, mitochondrial OS=Homo sapiens OX=9606 GN=CLYBL PE=1 SV=2	1	4	4	4	15.3	37.359	21122000	27886000			32297000		15666000		23105000	17570000	2.71017e+07	1.87803e+07	1.44309	-	0.102373
Q99816	TSG101	sp|Q99816|TS101_HUMAN Tumor susceptibility gene 101 protein OS=Homo sapiens OX=9606 GN=TSG101 PE=1 SV=2	1	12	12	12	30.3	43.944	101300000	136900000	96030000	124690000	92844000	72075000	79955000	74745000	88475000	67274000	110352800	76504800	1.44243	-	0.00697244
Q9H307	PNN	sp|Q9H307|PININ_HUMAN Pinin OS=Homo sapiens OX=9606 GN=PNN PE=1 SV=5	1	13	13	13	18.8	81.627	99706000	93413000	83480000	112680000	25283000	53870000	98668000		42505000	35069000	82912400	57528000	1.44125	-	0.27152
P42858	HTT	sp|P42858|HD_HUMAN Huntingtin OS=Homo sapiens OX=9606 GN=HTT PE=1 SV=2	1	15	15	15	6.5	347.6	40553000	64241000	31225000	34018000	54532000	31069000	49625000		24790000	19255000	44913800	31184750	1.44025	-	0.17894
Q9NY33	DPP3	sp|Q9NY33|DPP3_HUMAN Dipeptidyl peptidase 3 OS=Homo sapiens OX=9606 GN=DPP3 PE=1 SV=2	1	16	16	16	32.7	82.588	144630000	126010000	104150000	164340000	102990000	120460000	127090000	61416000	97265000	39753000	128424000	89196800	1.43978	-	0.0933923
P39019	RPS19	sp|P39019|RS19_HUMAN 40S ribosomal protein S19 OS=Homo sapiens OX=9606 GN=RPS19 PE=1 SV=2	1	13	13	13	57.9	16.06	858340000	1100100000	644730000	1204200000	685830000	621630000	1034900000	371330000	668150000	425340000	898640000	624270000	1.43951	-	0.127072
P55769	SNU13	sp|P55769|NH2L1_HUMAN NHP2-like protein 1 OS=Homo sapiens OX=9606 GN=SNU13 PE=1 SV=3	1	6	6	6	42.2	14.173	295120000	318450000	307960000	289660000	197710000	246950000	215190000		166460000	154610000	281780000	195802500	1.4391	-	0.027331
O43719	HTATSF1	sp|O43719|HTSF1_HUMAN HIV Tat-specific factor 1 OS=Homo sapiens OX=9606 GN=HTATSF1 PE=1 SV=1	1	7	7	7	9.5	85.852	250660000	198930000	138580000	93154000	85324000	99623000	159750000		97547000	69481000	153329600	106600250	1.43836	-	0.27613
Q5TDH0	DDI2	sp|Q5TDH0|DDI2_HUMAN Protein DDI1 homolog 2 OS=Homo sapiens OX=9606 GN=DDI2 PE=1 SV=1	1	7	7	7	27.3	44.522	72536000	120410000	65857000	66163000		25678000	108870000	80206000	36194000	31688000	81241500	56527200	1.43721	-	0.293169
P52566	ARHGDIB	sp|P52566|GDIR2_HUMAN Rho GDP-dissociation inhibitor 2 OS=Homo sapiens OX=9606 GN=ARHGDIB PE=1 SV=3	1	10	10	10	71.1	22.988	1257400000	1978100000	1354300000	1151200000	1496100000	1067500000	1934300000	789360000	873500000	371890000	1447420000	1007310000	1.43692	-	0.174959
P08708	RPS17	sp|P08708|RS17_HUMAN 40S ribosomal protein S17 OS=Homo sapiens OX=9606 GN=RPS17 PE=1 SV=2	1	8	8	8	62.2	15.55	1131200000	1030000000	818840000	1029300000	473990000	646250000	914400000	488390000	774030000	297770000	896666000	624168000	1.43658	-	0.125429
Q96JJ7	TMX3	sp|Q96JJ7|TMX3_HUMAN Protein disulfide-isomerase TMX3 OS=Homo sapiens OX=9606 GN=TMX3 PE=1 SV=2	1	7	7	7	15.9	51.871	154840000	141030000	82196000	140200000	74297000	46944000	130850000		85074000	67276000	118512600	82536000	1.43589	-	0.186964
P62851	RPS25	sp|P62851|RS25_HUMAN 40S ribosomal protein S25 OS=Homo sapiens OX=9606 GN=RPS25 PE=1 SV=1	1	5	5	5	29.6	13.742	1915100000	2355400000	1524000000	2478300000	1132900000	1399900000	1979800000	753750000	1662000000	757220000	1881140000	1310534000	1.4354	-	0.142793
P50452	SERPINB8	sp|P50452|SPB8_HUMAN Serpin B8 OS=Homo sapiens OX=9606 GN=SERPINB8 PE=1 SV=2	1	9	6	6	24.1	42.766	69357000	64212000	41587000	45832000	45331000	33634000	56669000		21109000		53263800	3.71373e+07	1.43424	-	0.181914
P19838	NFKB1	sp|P19838|NFKB1_HUMAN Nuclear factor NF-kappa-B p105 subunit OS=Homo sapiens OX=9606 GN=NFKB1 PE=1 SV=2	1	17	17	17	22.3	105.35	593180000	729810000	627710000	770140000	562890000	429200000	486270000	488140000	417890000	468690000	656746000	458038000	1.43382	-	0.00159442
Q8IXB1	DNAJC10	sp|Q8IXB1|DJC10_HUMAN DnaJ homolog subfamily C member 10 OS=Homo sapiens OX=9606 GN=DNAJC10 PE=1 SV=2	1	5	5	5	5.5	91.079	50305000	38120000	45448000	28132000	36315000	27907000			32056000	23057000	39664000	2.76733e+07	1.43329	-	0.0699925
Q9BWU0	SLC4A1AP	sp|Q9BWU0|NADAP_HUMAN Kanadaptin OS=Homo sapiens OX=9606 GN=SLC4A1AP PE=1 SV=1	1	7	7	7	10.8	88.813	25991000	38259000	17927000	26055000		18537000	22657000		15523000		27058000	1.89057e+07	1.43121	-	0.181465
Q96FV9	THOC1	sp|Q96FV9|THOC1_HUMAN THO complex subunit 1 OS=Homo sapiens OX=9606 GN=THOC1 PE=1 SV=1	1	5	5	5	7.3	75.665	91600000	74170000	59232000	80746000	61745000	67353000	39780000			47032000	73498600	5.13883e+07	1.43026	-	0.0695989
P82650	MRPS22	sp|P82650|RT22_HUMAN 28S ribosomal protein S22, mitochondrial OS=Homo sapiens OX=9606 GN=MRPS22 PE=1 SV=1	1	8	8	8	30	41.28	135560000	208400000	162250000	179370000	152650000	130680000	233470000	59525000	87009000	75609000	167646000	117258600	1.42971	-	0.173534
Q96JC1	VPS39	sp|Q96JC1|VPS39_HUMAN Vam6/Vps39-like protein OS=Homo sapiens OX=9606 GN=VPS39 PE=1 SV=2	1	9	9	9	15.7	101.81	57616000	51029000	49634000	31483000	29598000	25512000	52913000	19939000	34019000	21072000	43872000	30691000	1.42947	-	0.14997
Q9UK59	DBR1	sp|Q9UK59|DBR1_HUMAN Lariat debranching enzyme OS=Homo sapiens OX=9606 GN=DBR1 PE=1 SV=2	1	5	5	5	10.7	61.554	62864000	82496000	64796000	60665000	41945000	29320000	66920000		35061000		62553200	43767000	1.42923	-	0.172017
Q9NPJ3	ACOT13	sp|Q9NPJ3|ACO13_HUMAN Acyl-coenzyme A thioesterase 13 OS=Homo sapiens OX=9606 GN=ACOT13 PE=1 SV=1	1	4	4	4	46.4	14.96	155240000	257970000	244190000	570000000	209200000	255270000	234590000	182620000	203690000	129010000	287320000	201036000	1.4292	-	0.289611
O75439	PMPCB	sp|O75439|MPPB_HUMAN Mitochondrial-processing peptidase subunit beta OS=Homo sapiens OX=9606 GN=PMPCB PE=1 SV=2	1	10	9	9	24.5	54.366	52671000	65486000	69023000	77995000	40875000	42427000	67574000	41587000	40174000	22472000	61210000	42846800	1.42858	-	0.0950553
Q99417	MYCBP	sp|Q99417|MYCBP_HUMAN c-Myc-binding protein OS=Homo sapiens OX=9606 GN=MYCBP PE=1 SV=3	1	5	5	5	66	11.967	309400000	286520000	185300000	288560000	187000000	171830000	272080000		169650000	90816000	251356000	176094000	1.4274	-	0.135891
O43765	SGTA	sp|O43765|SGTA_HUMAN Small glutamine-rich tetratricopeptide repeat-containing protein alpha OS=Homo sapiens OX=9606 GN=SGTA PE=1 SV=1	1	6	6	6	22.7	34.063	165830000	67751000	50573000	186480000	61823000	90149000	73463000		60212000		106491400	74608000	1.42735	-	0.443363
Q00839	HNRNPU	sp|Q00839|HNRPU_HUMAN Heterogeneous nuclear ribonucleoprotein U OS=Homo sapiens OX=9606 GN=HNRNPU PE=1 SV=6	1	22	22	22	32.8	90.583	2914800000	1944700000	2799300000	3137900000	1417400000	2568600000	1530400000	1153900000	2165100000	1153900000	2442820000	1714380000	1.4249	-	0.130023
P02751	FN1	sp|P02751|FINC_HUMAN Fibronectin OS=Homo sapiens OX=9606 GN=FN1 PE=1 SV=5	1	78	78	78	42.3	272.32	2171500000	2200200000	2757600000	3530800000	1409100000	795630000	1697500000	2521800000	672060000	2784700000	2413840000	1694338000	1.42465	-	0.232546
P78527	PRKDC	sp|P78527|PRKDC_HUMAN DNA-dependent protein kinase catalytic subunit OS=Homo sapiens OX=9606 GN=PRKDC PE=1 SV=3	1	130	130	130	34.2	469.08	572620000	746650000	723600000	637530000	452370000	489240000	656390000	321660000	417040000	316100000	626554000	440086000	1.42371	-	0.0538553
Q08752	PPID	sp|Q08752|PPID_HUMAN Peptidyl-prolyl cis-trans isomerase D OS=Homo sapiens OX=9606 GN=PPID PE=1 SV=3	1	10	10	10	28.6	40.763	76575000	85074000	86791000	145560000	51129000		76239000		66686000	44694000	89025800	6.25397e+07	1.42351	-	0.269406
Q13636	RAB31	sp|Q13636|RAB31_HUMAN Ras-related protein Rab-31 OS=Homo sapiens OX=9606 GN=RAB31 PE=1 SV=1	1	5	5	3	34.5	21.569	150520000	102880000	115440000	220240000	117070000	74339000	77052000		182390000	63142000	141230000	99230750	1.42325	-	0.26129
Q13630	GFUS	sp|Q13630|FCL_HUMAN GDP-L-fucose synthase OS=Homo sapiens OX=9606 GN=GFUS PE=1 SV=1	1	8	8	8	38	35.892	119600000	94027000	91653000	217120000	74920000	88603000	110970000	94479000	66017000	59718000	119464000	83957400	1.42291	-	0.226845
P35250	RFC2	sp|P35250|RFC2_HUMAN Replication factor C subunit 2 OS=Homo sapiens OX=9606 GN=RFC2 PE=1 SV=3	1	9	9	9	28.5	39.157	59371000	132910000	86187000	114380000	36327000	41901000	84514000	60531000	78894000	35837000	85835000	60335400	1.42263	-	0.239472
P04179	SOD2	sp|P04179|SODM_HUMAN Superoxide dismutase [Mn], mitochondrial OS=Homo sapiens OX=9606 GN=SOD2 PE=1 SV=3	1	13	13	13	64.9	24.75	804010000	1061800000	1873900000	1791700000	2190900000	1274900000	1520000000	494390000	1362600000	776790000	1544462000	1085736000	1.4225	-	0.196026
P08865;A0A8I5KQE6	RPSA; RPSA2	sp|P08865|RSSA_HUMAN 40S ribosomal protein SA OS=Homo sapiens OX=9606 GN=RPSA PE=1 SV=4;sp|A0A8I5KQE6|RPSA2_HUMAN 40S ribosomal protein SA OS=Homo sapiens OX=9606 GN=RPSA2 PE=3 SV=1	2	15	15	15	63.4	32.854	2314800000	1910800000	1311400000	1814700000	1289600000	1212900000	1866500000	1045200000	1180400000	769790000	1728260000	1214958000	1.42249	-	0.0886838
P21964	COMT	sp|P21964|COMT_HUMAN Catechol O-methyltransferase OS=Homo sapiens OX=9606 GN=COMT PE=1 SV=2	1	12	12	12	45.8	30.037	352100000	387360000	336020000	439250000	302550000	291380000	309390000	208600000	243480000	224760000	363456000	255522000	1.42241	-	0.00740451
Q15637	SF1	sp|Q15637|SF01_HUMAN Splicing factor 1 OS=Homo sapiens OX=9606 GN=SF1 PE=1 SV=4	1	4	4	4	10.2	68.329	51379000	52130000	50590000	42927000	29789000	30035000	43460000	21137000	33057000		45363000	31922250	1.42105	-	0.0693569
P53992	SEC24C	sp|P53992|SC24C_HUMAN Protein transport protein Sec24C OS=Homo sapiens OX=9606 GN=SEC24C PE=1 SV=3	1	15	15	15	18.3	118.32	99738000	96352000	83835000	116670000	84693000	62473000	101220000	48525000	80790000	45956000	96257600	67792800	1.41988	-	0.0450876
P23396	RPS3	sp|P23396|RS3_HUMAN 40S ribosomal protein S3 OS=Homo sapiens OX=9606 GN=RPS3 PE=1 SV=2	1	17	17	17	65.8	26.688	2289200000	2498800000	1746000000	2578200000	1743500000	1375200000	2516800000	1242800000	1507700000	1007500000	2171140000	1530000000	1.41905	-	0.0774238
O00139	KIF2A	sp|O00139|KIF2A_HUMAN Kinesin-like protein KIF2A OS=Homo sapiens OX=9606 GN=KIF2A PE=1 SV=3	1	6	6	6	9.2	79.954	31657000	40238000	31739000	48666000	22187000		33000000	19855000	20957000		34897400	24604000	1.41836	-	0.175899
O95630	STAMBP	sp|O95630|STABP_HUMAN STAM-binding protein OS=Homo sapiens OX=9606 GN=STAMBP PE=1 SV=1	1	7	7	7	21.7	48.076	90853000	62956000	75261000	94189000	33690000	39615000	66681000	46728000	48394000		71389800	50354500	1.41774	-	0.161212
P63244	RACK1	sp|P63244|RACK1_HUMAN Receptor of activated protein C kinase 1 OS=Homo sapiens OX=9606 GN=RACK1 PE=1 SV=3	1	18	18	18	72.2	35.076	2336900000	2190600000	1795500000	2596500000	1665300000	1543900000	2308600000	986170000	1537700000	1091600000	2116960000	1493594000	1.41736	-	0.0636229
Q15155;Q5JPE7;P69849	NOMO1; NOMO2	sp|Q15155|NOMO1_HUMAN BOS complex subunit NOMO1 OS=Homo sapiens OX=9606 GN=NOMO1 PE=1 SV=5;sp|Q5JPE7|NOMO2_HUMAN BOS complex subunit NOMO2 OS=Homo sapiens OX=9606 GN=NOMO2 PE=1 SV=1;sp|P69849|NOMO3_HUMAN BOS complex subunit NOMO3 OS=Homo sapiens OX=9606 GN	3	20	20	20	22.2	134.32	170790000	132910000	112100000	255990000	130070000	108230000	126530000	79227000	146180000	105580000	160372000	113149400	1.41735	-	0.130985
O75663	TIPRL	sp|O75663|TIPRL_HUMAN TIP41-like protein OS=Homo sapiens OX=9606 GN=TIPRL PE=1 SV=2	1	8	8	8	45.2	31.444	228350000	266430000	158440000	264380000	205040000	160640000	213350000	152910000	143370000	121820000	224528000	158418000	1.41731	-	0.030605
Q86U42	PABPN1	sp|Q86U42|PABP2_HUMAN Polyadenylate-binding protein 2 OS=Homo sapiens OX=9606 GN=PABPN1 PE=1 SV=3	1	6	6	6	20.6	32.749	217450000	316110000	251400000	290360000	165230000	193760000	168510000	93910000	244120000		248110000	175075000	1.41716	-	0.117047
P54578	USP14	sp|P54578|UBP14_HUMAN Ubiquitin carboxyl-terminal hydrolase 14 OS=Homo sapiens OX=9606 GN=USP14 PE=1 SV=3	1	20	20	20	44.3	56.068	309270000	273850000	197090000	266660000	199810000	221850000	171790000	164180000	172110000	150240000	249336000	176034000	1.41641	-	0.0193267
O00483	NDUFA4	sp|O00483|NDUA4_HUMAN Cytochrome c oxidase subunit NDUFA4 OS=Homo sapiens OX=9606 GN=NDUFA4 PE=1 SV=1	1	3	3	3	30.9	9.3697	274600000		285840000	605680000	239240000	243320000	314430000	71612000	381730000	229530000	351340000	248124400	1.41598	-	0.314561
Q15717	ELAVL1	sp|Q15717|ELAV1_HUMAN ELAV-like protein 1 OS=Homo sapiens OX=9606 GN=ELAVL1 PE=1 SV=2	1	9	9	8	31.6	36.091	405910000	379070000	497980000	408640000	225220000	357830000	294790000	161660000	361390000	178430000	383364000	270820000	1.41557	-	0.105545
P42345	MTOR	sp|P42345|MTOR_HUMAN Serine/threonine-protein kinase mTOR OS=Homo sapiens OX=9606 GN=MTOR PE=1 SV=1	1	22	22	22	11.7	288.89	102480000	92794000	86636000	133090000	51831000	60425000	95036000	69080000	46406000	59140000	93366200	66017400	1.41427	-	0.113766
P38606	ATP6V1A	sp|P38606|VATA_HUMAN V-type proton ATPase catalytic subunit A OS=Homo sapiens OX=9606 GN=ATP6V1A PE=1 SV=2	1	19	19	19	37.1	68.303	600350000	464760000	279130000	401690000	251980000	285500000	383420000	219890000	305840000	218420000	399582000	282614000	1.41388	-	0.136042
O94925	GLS	sp|O94925|GLSK_HUMAN Glutaminase kidney isoform, mitochondrial OS=Homo sapiens OX=9606 GN=GLS PE=1 SV=1	1	7	7	7	12	73.46	47869000	32554000	66673000	55373000	37834000	43270000	25823000		32926000		48060600	3.40063e+07	1.41328	-	0.16695
Q13185	CBX3	sp|Q13185|CBX3_HUMAN Chromobox protein homolog 3 OS=Homo sapiens OX=9606 GN=CBX3 PE=1 SV=4	1	7	6	5	36.1	20.811	234020000	274620000	166460000	177630000	155080000	173840000	224780000	82679000	144210000	87652000	201562000	142632200	1.41316	-	0.132079
P07900;Q14568;Q58FF6;Q58FG0	HSP90AA1	sp|P07900|HS90A_HUMAN Heat shock protein HSP 90-alpha OS=Homo sapiens OX=9606 GN=HSP90AA1 PE=1 SV=5	4	46	30	30	56	84.659	3043300000	3789200000	3628300000	5112800000	2408400000	2876000000	3338600000	1853700000	3122000000	1539500000	3596400000	2545960000	1.41259	-	0.105224
P20340;Q9NRW1	RAB6A; RAB6B	sp|P20340|RAB6A_HUMAN Ras-related protein Rab-6A OS=Homo sapiens OX=9606 GN=RAB6A PE=1 SV=3;sp|Q9NRW1|RAB6B_HUMAN Ras-related protein Rab-6B OS=Homo sapiens OX=9606 GN=RAB6B PE=1 SV=1	2	10	10	7	55.3	23.593	1540000000	930450000	962430000	1305200000	801980000	772250000	856590000	681860000	961390000	649850000	1108012000	784388000	1.41258	-	0.0600234
P23528	CFL1	sp|P23528|COF1_HUMAN Cofilin-1 OS=Homo sapiens OX=9606 GN=CFL1 PE=1 SV=3	1	21	21	17	74.7	18.502	8028300000	5805100000	7447500000	8617100000	6106100000	5441900000	6390200000	4361500000	4718600000	4587300000	7200820000	5099900000	1.41195	-	0.0126555
P23743	DGKA	sp|P23743|DGKA_HUMAN Diacylglycerol kinase alpha OS=Homo sapiens OX=9606 GN=DGKA PE=1 SV=3	1	10	10	10	14	82.629	81121000	68706000	66739000	55229000	25305000	44520000	75655000	37398000	19718000	33169000	59420000	42092000	1.41167	-	0.22821
Q9P2X0	DPM3	sp|Q9P2X0|DPM3_HUMAN Dolichol-phosphate mannosyltransferase subunit 3 OS=Homo sapiens OX=9606 GN=DPM3 PE=1 SV=2	1	2	2	2	23.9	10.094	129600000	161660000	89190000	187140000	99177000	69150000	162220000			52027000	133353400	9.44657e+07	1.41166	-	0.310313
Q9UBQ5	EIF3K	sp|Q9UBQ5|EIF3K_HUMAN Eukaryotic translation initiation factor 3 subunit K OS=Homo sapiens OX=9606 GN=EIF3K PE=1 SV=1	1	5	5	5	24.3	25.059	263420000	284380000	180620000	293310000	209700000	160220000	285660000	131040000	175680000	120150000	246286000	174550000	1.41098	-	0.0867229
Q6NUK1	SLC25A24	sp|Q6NUK1|SCMC1_HUMAN Calcium-binding mitochondrial carrier protein SCaMC-1 OS=Homo sapiens OX=9606 GN=SLC25A24 PE=1 SV=2	1	20	20	20	46.1	53.354	776760000	490960000	554090000	448250000	267490000	348170000	512560000	296160000	374910000	267510000	507510000	359862000	1.41029	-	0.15036
O43809	NUDT21	sp|O43809|CPSF5_HUMAN Cleavage and polyadenylation specificity factor subunit 5 OS=Homo sapiens OX=9606 GN=NUDT21 PE=1 SV=1	1	9	9	9	44.5	26.227	544790000	422340000	447950000	594430000	278750000	354520000	372660000	301130000	354010000	240590000	457652000	324582000	1.40997	-	0.0564485
Q4VC31	MIX23	sp|Q4VC31|MIX23_HUMAN Protein MIX23 OS=Homo sapiens OX=9606 GN=MIX23 PE=1 SV=1	1	3	3	3	19.4	16.62	106750000	64083000	177370000	81212000	75053000	64271000	94448000		55985000		100893600	71568000	1.40976	-	0.342561
P04843	RPN1	sp|P04843|RPN1_HUMAN Dolichyl-diphosphooligosaccharide--protein glycosyltransferase subunit 1 OS=Homo sapiens OX=9606 GN=RPN1 PE=1 SV=1	1	33	33	33	65.7	68.569	1829700000	1538300000	1077800000	1499500000	1445200000	1039100000	1054800000	924380000	1351900000	873390000	1478100000	1048714000	1.40944	-	0.0187753
P36776	LONP1	sp|P36776|LONM_HUMAN Lon protease homolog, mitochondrial OS=Homo sapiens OX=9606 GN=LONP1 PE=1 SV=2	1	19	19	19	24.7	106.49	207840000	86200000	93888000	148540000	84629000	110220000	93908000	46070000	129060000	61997000	124219400	88251000	1.40757	-	0.24142
O14744	PRMT5	sp|O14744|ANM5_HUMAN Protein arginine N-methyltransferase 5 OS=Homo sapiens OX=9606 GN=PRMT5 PE=1 SV=4	1	11	11	11	21.8	72.683	193890000	159500000	161530000	223550000	136810000	141650000	178060000	116220000	122550000	63386000	175056000	124373200	1.40751	-	0.0681109
Q96C01	FAM136A	sp|Q96C01|F136A_HUMAN Protein FAM136A OS=Homo sapiens OX=9606 GN=FAM136A PE=1 SV=1	1	4	4	4	23.9	15.641	53628000	60006000	35674000	68112000		34955000	67107000	31698000	32345000	27099000	54355000	38640800	1.40667	-	0.166998
P30533	LRPAP1	sp|P30533|AMRP_HUMAN Alpha-2-macroglobulin receptor-associated protein OS=Homo sapiens OX=9606 GN=LRPAP1 PE=1 SV=1	1	13	13	13	34.2	41.465	170760000	221590000	184600000	207920000	166730000	193990000	114500000	128740000	126760000	112830000	190320000	135364000	1.40599	-	0.0173394
P30050	RPL12	sp|P30050|RL12_HUMAN 60S ribosomal protein L12 OS=Homo sapiens OX=9606 GN=RPL12 PE=1 SV=1	1	7	7	7	59.4	17.818	1194600000	1292500000	773990000	981750000	754550000	774550000	1230700000	408250000	608980000	534750000	999478000	711446000	1.40485	-	0.146674
Q96CS3	FAF2	sp|Q96CS3|FAF2_HUMAN FAS-associated factor 2 OS=Homo sapiens OX=9606 GN=FAF2 PE=1 SV=2	1	8	8	8	24.5	52.623	30190000	42039000	46099000	88840000	36702000	20859000	39495000		35899000	42768000	48774000	34755250	1.40336	-	0.299015
P36551	CPOX	sp|P36551|HEM6_HUMAN Oxygen-dependent coproporphyrinogen-III oxidase, mitochondrial OS=Homo sapiens OX=9606 GN=CPOX PE=1 SV=3	1	20	20	20	51.3	50.151	151570000	434590000	215270000	67611000	57008000	66414000	461300000	59252000	49432000	23938000	185209800	132067200	1.40239	-	0.634269
O75643	SNRNP200	sp|O75643|U520_HUMAN U5 small nuclear ribonucleoprotein 200 kDa helicase OS=Homo sapiens OX=9606 GN=SNRNP200 PE=1 SV=2	1	61	61	61	35.1	244.5	333140000	359060000	359220000	348610000	245040000	255910000	315100000	149770000	258210000	195260000	329014000	234850000	1.40095	-	0.0298538
P07203	GPX1	sp|P07203|GPX1_HUMAN Glutathione peroxidase 1 OS=Homo sapiens OX=9606 GN=GPX1 PE=1 SV=4	1	11	11	11	61.1	22.088	522460000	689320000	428950000	460970000	348260000	333680000	575270000	298350000	356160000	185960000	489992000	349884000	1.40044	-	0.139751
Q15393	SF3B3	sp|Q15393|SF3B3_HUMAN Splicing factor 3B subunit 3 OS=Homo sapiens OX=9606 GN=SF3B3 PE=1 SV=4	1	28	28	28	28.6	135.58	256880000	276290000	204360000	262890000	155110000	219640000	212740000	122310000	162750000	108110000	231106000	165110000	1.39971	-	0.0734066
P51553	IDH3G	sp|P51553|IDH3G_HUMAN Isocitrate dehydrogenase [NAD] subunit gamma, mitochondrial OS=Homo sapiens OX=9606 GN=IDH3G PE=1 SV=1	1	7	7	7	27	42.794	111650000	101290000	83902000	170710000	80032000	81647000	67889000	59219000	129130000	53470000	109516800	78271000	1.3992	-	0.17955
P18433	PTPRA	sp|P18433|PTPRA_HUMAN Receptor-type tyrosine-protein phosphatase alpha OS=Homo sapiens OX=9606 GN=PTPRA PE=1 SV=3	1	10	10	8	17.2	90.718	92268000	152350000		34411000		72509000	64379000	47679000	91688000	56288000	9.30097e+07	66508600	1.39846	-	0.361171
Q9Y4W6	AFG3L2	sp|Q9Y4W6|AFG32_HUMAN AFG3-like protein 2 OS=Homo sapiens OX=9606 GN=AFG3L2 PE=1 SV=2	1	22	22	21	32.4	88.583	156740000	123370000	100150000	100300000	55232000	97883000	108560000	51009000	75238000	50554000	107158400	76648800	1.39804	-	0.17313
P40227;Q92526	CCT6A	sp|P40227|TCPZ_HUMAN T-complex protein 1 subunit zeta OS=Homo sapiens OX=9606 GN=CCT6A PE=1 SV=3	2	19	19	19	45	58.024	1124200000	1323900000	1455700000	1517500000	840560000	901940000	1101700000	894360000	916220000	665200000	1252372000	895884000	1.39792	-	0.0355558
O75431	MTX2	sp|O75431|MTX2_HUMAN Metaxin-2 OS=Homo sapiens OX=9606 GN=MTX2 PE=1 SV=1	1	6	6	6	32.3	29.763	163720000	256510000	168460000	180210000	160790000	119470000	148360000	156400000	106800000	134190000	185938000	133044000	1.39757	-	0.0302504
P35998	PSMC2	sp|P35998|PRS7_HUMAN 26S proteasome regulatory subunit 7 OS=Homo sapiens OX=9606 GN=PSMC2 PE=1 SV=3	1	24	24	24	59.6	48.633	421050000	332580000	338960000	567700000	348910000	302710000	346210000	237790000	277650000	273840000	401840000	287640000	1.39702	-	0.0442154
A6NDG6	PGP	sp|A6NDG6|PGP_HUMAN Glycerol-3-phosphate phosphatase OS=Homo sapiens OX=9606 GN=PGP PE=1 SV=1	1	6	6	6	22.1	34.006	35608000	39696000	33741000	71963000	37542000	32040000	34815000	37058000	21251000		43710000	31291000	1.39689	-	0.194313
P11279	LAMP1	sp|P11279|LAMP1_HUMAN Lysosome-associated membrane glycoprotein 1 OS=Homo sapiens OX=9606 GN=LAMP1 PE=1 SV=3	1	4	4	4	8.6	44.882		417860000	532310000	808270000	629440000	407380000	395570000	324730000	378770000	630670000	596970000	427424000	1.39667	-	0.114435
Q6P2Q9	PRPF8	sp|Q6P2Q9|PRP8_HUMAN Pre-mRNA-processing-splicing factor 8 OS=Homo sapiens OX=9606 GN=PRPF8 PE=1 SV=2	1	59	59	59	29.6	273.6	308910000	411160000	412150000	452560000	234410000	277470000	336610000	195350000	277900000	215410000	363838000	260548000	1.39643	-	0.0608075
P61204;P84077	ARF3; ARF1	sp|P61204|ARF3_HUMAN ADP-ribosylation factor 3 OS=Homo sapiens OX=9606 GN=ARF3 PE=1 SV=2;sp|P84077|ARF1_HUMAN ADP-ribosylation factor 1 OS=Homo sapiens OX=9606 GN=ARF1 PE=1 SV=2	2	8	4	4	53	20.601	1159300000	1231100000	825950000	1096400000	695790000	680930000	885330000		856710000	447530000	1001708000	717625000	1.39587	-	0.0931776
Q12884	FAP	sp|Q12884|SEPR_HUMAN Prolyl endopeptidase FAP OS=Homo sapiens OX=9606 GN=FAP PE=1 SV=5	1	19	19	19	30.4	87.711	86604000	102830000	128420000	84910000	52515000	48475000	152050000	69943000	6959300	49038000	91055800	65293060	1.39457	-	0.36787
Q8WYP5	AHCTF1	sp|Q8WYP5|ELYS_HUMAN Protein ELYS OS=Homo sapiens OX=9606 GN=AHCTF1 PE=1 SV=3	1	8	8	8	4.4	252.5	33063000	25086000	45344000	34203000	15699000	16675000	24634000		30683000	16042000	30679000	22008500	1.39396	-	0.216902
Q9Y4E8	USP15	sp|Q9Y4E8|UBP15_HUMAN Ubiquitin carboxyl-terminal hydrolase 15 OS=Homo sapiens OX=9606 GN=USP15 PE=1 SV=3	1	17	17	15	17.9	112.42	122900000	90016000	123460000	174720000	91477000	90570000	86995000	109920000	82571000	62769000	120514600	86565000	1.39219	-	0.0828309
P49748	ACADVL	sp|P49748|ACADV_HUMAN Very long-chain specific acyl-CoA dehydrogenase, mitochondrial OS=Homo sapiens OX=9606 GN=ACADVL PE=1 SV=1	1	29	29	29	56	70.389	301320000	357520000	463350000	631070000	235940000	267260000	358360000	282060000	328840000	192740000	397840000	285852000	1.39177	-	0.172852
P62820;P59190	RAB1A	sp|P62820|RAB1A_HUMAN Ras-related protein Rab-1A OS=Homo sapiens OX=9606 GN=RAB1A PE=1 SV=3	2	11	4	4	66.3	22.677	526530000	364580000	303410000	541800000	299190000	336470000	408330000	142780000	307670000	267750000	407102000	292600000	1.39133	-	0.135609
Q6IAA8	LAMTOR1	sp|Q6IAA8|LTOR1_HUMAN Ragulator complex protein LAMTOR1 OS=Homo sapiens OX=9606 GN=LAMTOR1 PE=1 SV=2	1	6	6	6	46	17.745	124480000	88603000	85421000	123800000	71918000	68612000	86151000		82477000	47034000	98844400	71068500	1.39083	-	0.0953213
P38646	HSPA9	sp|P38646|GRP75_HUMAN Stress-70 protein, mitochondrial OS=Homo sapiens OX=9606 GN=HSPA9 PE=1 SV=2	1	34	34	34	57.9	73.68	612800000	811560000	941500000	861050000	516350000	575810000	647190000	370620000	655390000	443140000	748652000	538430000	1.39044	-	0.0632938
Q9Y6Y8	SEC23IP	sp|Q9Y6Y8|S23IP_HUMAN SEC23-interacting protein OS=Homo sapiens OX=9606 GN=SEC23IP PE=1 SV=1	1	10	10	10	13.6	111.08	64982000	86218000	78273000	100040000	83725000	53385000	75233000		60948000	48252000	82647600	59454500	1.3901	-	0.0262168
O95834	EML2	sp|O95834|EMAL2_HUMAN Echinoderm microtubule-associated protein-like 2 OS=Homo sapiens OX=9606 GN=EML2 PE=1 SV=1	1	13	13	13	28.7	70.678	175660000	194780000	103210000	156350000	143800000	102140000	187680000	47095000	127370000	92629000	154760000	111382800	1.38944	-	0.157404
P06733	ENO1	sp|P06733|ENOA_HUMAN Alpha-enolase OS=Homo sapiens OX=9606 GN=ENO1 PE=1 SV=2	1	27	27	25	68.9	47.168	5512500000	5894000000	6026900000	5728700000	4176300000	4405200000	6274100000	2552200000	4172800000	2273300000	5467680000	3935520000	1.38932	-	0.0902532
Q9HAN9	NMNAT1	sp|Q9HAN9|NMNA1_HUMAN Nicotinamide/nicotinic acid mononucleotide adenylyltransferase 1 OS=Homo sapiens OX=9606 GN=NMNAT1 PE=1 SV=1	1	4	4	4	17.6	31.932	70827000	67592000	63390000		47153000	32823000	56426000		45172000		62240500	44807000	1.38908	-	0.0936638
Q15063;CON__Q2KJC7	POSTN	sp|Q15063|POSTN_HUMAN Periostin OS=Homo sapiens OX=9606 GN=POSTN PE=1 SV=2	2	33	33	33	45.7	93.313	597440000	536450000	1583500000	537730000	387620000	605720000	623610000	185280000	965390000	242620000	728548000	524524000	1.38897	-	0.45378
Q01105;P0DME0	SET; SETSIP	sp|Q01105|SET_HUMAN Protein SET OS=Homo sapiens OX=9606 GN=SET PE=1 SV=3;sp|P0DME0|SETLP_HUMAN Protein SETSIP OS=Homo sapiens OX=9606 GN=SETSIP PE=1 SV=1	2	9	9	9	34.1	33.488	1604700000	1462900000	1565500000	1630400000	1349900000	1291200000	1606000000	664280000	1290700000	629150000	1522680000	1096266000	1.38897	-	0.0647697
O94832	MYO1D	sp|O94832|MYO1D_HUMAN Unconventional myosin-Id OS=Homo sapiens OX=9606 GN=MYO1D PE=1 SV=2	1	31	31	30	34.5	116.2	131250000	187130000	115510000	83766000	150570000	89880000	121480000	85059000	84251000	100520000	133645200	96238000	1.38869	-	0.0794058
P55145	MANF	sp|P55145|MANF_HUMAN Mesencephalic astrocyte-derived neurotrophic factor OS=Homo sapiens OX=9606 GN=MANF PE=1 SV=3	1	7	7	7	40.7	20.7	230790000	175690000	150290000	193680000	232310000	177200000	179040000	106040000	126820000	118850000	196552000	141590000	1.38818	-	0.0372216
Q7KZF4	SND1	sp|Q7KZF4|SND1_HUMAN Staphylococcal nuclease domain-containing protein 1 OS=Homo sapiens OX=9606 GN=SND1 PE=1 SV=1	1	36	36	36	44.9	102	433530000	454760000	388460000	539900000	491740000	356370000	402400000	303110000	339000000	262650000	461678000	332706000	1.38765	-	0.00615125
P00533	EGFR	sp|P00533|EGFR_HUMAN Epidermal growth factor receptor OS=Homo sapiens OX=9606 GN=EGFR PE=1 SV=2	1	17	17	16	19.8	134.28	308520000	109080000	173890000	229130000	162440000	82511000	155820000	126390000	228460000	115320000	196612000	141700200	1.38752	-	0.226231
O43633	CHMP2A	sp|O43633|CHM2A_HUMAN Charged multivesicular body protein 2a OS=Homo sapiens OX=9606 GN=CHMP2A PE=1 SV=1	1	6	6	6	21.6	25.104	117410000	104930000	40706000	57520000	45010000	44034000	53580000		60499000		73115200	5.27043e+07	1.38727	-	0.378846
O43684	BUB3	sp|O43684|BUB3_HUMAN Mitotic checkpoint protein BUB3 OS=Homo sapiens OX=9606 GN=BUB3 PE=1 SV=1	1	10	10	10	37.2	37.154	466750000	358190000	383520000	480240000	319510000	348610000	407160000	148270000	274100000	269500000	401642000	289528000	1.38723	-	0.0695204
Q05655;Q04759	PRKCD	sp|Q05655|KPCD_HUMAN Protein kinase C delta type OS=Homo sapiens OX=9606 GN=PRKCD PE=1 SV=2	2	9	9	9	14.9	77.504	81642000	67341000	49971000	43919000	50390000	34786000	42386000		49674000		58652600	42282000	1.38718	-	0.145103
O15372	EIF3H	sp|O15372|EIF3H_HUMAN Eukaryotic translation initiation factor 3 subunit H OS=Homo sapiens OX=9606 GN=EIF3H PE=1 SV=1	1	10	10	10	25.6	39.93	170920000	260010000	164290000	230530000	152750000	185510000	188220000	83106000	128630000	120080000	195700000	141109200	1.38687	-	0.0976009
P30084	ECHS1	sp|P30084|ECHM_HUMAN Enoyl-CoA hydratase, mitochondrial OS=Homo sapiens OX=9606 GN=ECHS1 PE=1 SV=4	1	8	8	8	31.4	31.387	602390000	572420000	386080000	503760000	195980000	268620000	640820000	182620000	350530000	187600000	452126000	326038000	1.38673	-	0.294257
Q9BRJ6	C7orf50	sp|Q9BRJ6|CG050_HUMAN Uncharacterized protein C7orf50 OS=Homo sapiens OX=9606 GN=C7orf50 PE=1 SV=1	1	3	3	3	24.2	22.083	38165000	49154000	45084000	54714000		45084000	55222000	22295000	30364000	15721000	46779250	33737200	1.38658	-	0.181612
P00403	MT-CO2	sp|P00403|COX2_HUMAN Cytochrome c oxidase subunit 2 OS=Homo sapiens OX=9606 GN=MT-CO2 PE=1 SV=1	1	5	5	5	27.8	25.565	1824800000	2036100000	2012600000	2143200000	1234600000	1093900000	2048800000	797670000	1844000000	888520000	1850260000	1334578000	1.3864	-	0.127628
Q08211	DHX9	sp|Q08211|DHX9_HUMAN ATP-dependent RNA helicase A OS=Homo sapiens OX=9606 GN=DHX9 PE=1 SV=4	1	44	44	44	40.5	140.96	384500000	465170000	452280000	432650000	296370000	371990000	365680000	227340000	315240000	185640000	406194000	293178000	1.38549	-	0.0474802
Q06787	FMR1	sp|Q06787|FMR1_HUMAN Fragile X messenger ribonucleoprotein 1 OS=Homo sapiens OX=9606 GN=FMR1 PE=1 SV=1	1	5	4	4	7.8	71.174	148230000	152590000	105100000	230490000	104310000	122270000	130070000		92117000	83693000	148144000	107037500	1.38404	-	0.184087
Q9NTK5	OLA1	sp|Q9NTK5|OLA1_HUMAN Obg-like ATPase 1 OS=Homo sapiens OX=9606 GN=OLA1 PE=1 SV=2	1	16	16	16	49.7	44.743	264820000	320400000	234310000	307380000	272410000	201890000	216410000	245790000	176120000	171190000	279864000	202280000	1.38355	-	0.00551974
Q8TD16;Q96G01	BICD2	sp|Q8TD16|BICD2_HUMAN Protein bicaudal D homolog 2 OS=Homo sapiens OX=9606 GN=BICD2 PE=1 SV=1	2	12	12	12	17.4	93.532	61685000	54352000	58249000	176520000	43253000	34302000	56688000	87740000	73211000	32941000	78811800	56976400	1.38324	-	0.439753
Q969T9	WBP2	sp|Q969T9|WBP2_HUMAN WW domain-binding protein 2 OS=Homo sapiens OX=9606 GN=WBP2 PE=1 SV=1	1	5	5	5	16.9	28.087	60913000	137890000	100220000	159270000	68936000	60036000	85255000	78735000	90725000	66466000	105445800	76243400	1.38302	-	0.181126
Q3ZCQ8	TIMM50	sp|Q3ZCQ8|TIM50_HUMAN Mitochondrial import inner membrane translocase subunit TIM50 OS=Homo sapiens OX=9606 GN=TIMM50 PE=1 SV=2	1	6	6	6	20.7	39.646	176320000	105530000	114790000	151510000	111970000	84053000	138530000		63809000		132024000	95464000	1.38297	-	0.185594
Q02818	NUCB1	sp|Q02818|NUCB1_HUMAN Nucleobindin-1 OS=Homo sapiens OX=9606 GN=NUCB1 PE=1 SV=4	1	19	19	19	50.3	53.879	210360000	156390000	136440000	227770000	128760000	150710000	214700000	44906000	124860000	86645000	171944000	124364200	1.38258	-	0.211518
Q8IZ81	ELMOD2	sp|Q8IZ81|ELMD2_HUMAN ELMO domain-containing protein 2 OS=Homo sapiens OX=9606 GN=ELMOD2 PE=1 SV=1	1	6	6	6	19.5	34.96	72289000	69801000	30883000	66252000	60788000	40550000	64508000	35576000	32974000		60002600	43402000	1.38248	-	0.162381
P11310	ACADM	sp|P11310|ACADM_HUMAN Medium-chain specific acyl-CoA dehydrogenase, mitochondrial OS=Homo sapiens OX=9606 GN=ACADM PE=1 SV=1	1	14	14	14	34.7	46.588	174220000	311180000	314660000	160820000	221080000	160630000	320010000	131410000	115420000	127550000	236392000	171004000	1.38238	-	0.22891
O00178	GTPBP1	sp|O00178|GTPB1_HUMAN GTP-binding protein 1 OS=Homo sapiens OX=9606 GN=GTPBP1 PE=1 SV=3	1	5	5	5	9.1	72.453	74836000	74535000	59205000	98144000	57155000	53173000	70606000	44451000	57656000	37421000	72775000	52661400	1.38194	-	0.0622867
Q8WVM8	SCFD1	sp|Q8WVM8|SCFD1_HUMAN Sec1 family domain-containing protein 1 OS=Homo sapiens OX=9606 GN=SCFD1 PE=1 SV=4	1	13	13	13	28	72.379	115240000	41848000	74540000	94123000	69353000	63365000	66525000	62508000	64786000	28730000	79020800	57182800	1.3819	-	0.163722
Q14008	CKAP5	sp|Q14008|CKAP5_HUMAN Cytoskeleton-associated protein 5 OS=Homo sapiens OX=9606 GN=CKAP5 PE=1 SV=3	1	25	25	25	15	225.49	105610000	80580000	97692000	83422000	75542000	81835000	89102000	47675000	51554000	50299000	88569200	64093000	1.38189	-	0.0475237
P61158;Q9P1U1	ACTR3	sp|P61158|ARP3_HUMAN Actin-related protein 3 OS=Homo sapiens OX=9606 GN=ACTR3 PE=1 SV=3	2	19	19	19	54.5	47.371	1813600000	1516400000	1353500000	1248300000	1280100000	948370000	1449700000	970270000	897400000	953670000	1442380000	1043882000	1.38175	-	0.0255729
Q9Y570	PPME1	sp|Q9Y570|PPME1_HUMAN Protein phosphatase methylesterase 1 OS=Homo sapiens OX=9606 GN=PPME1 PE=1 SV=3	1	6	6	6	16.8	42.315	60541000	36783000	68383000	97854000	53296000	44927000	31165000	65595000	41786000		63371400	45868250	1.3816	-	0.222066
Q9UHQ9	CYB5R1	sp|Q9UHQ9|NB5R1_HUMAN NADH-cytochrome b5 reductase 1 OS=Homo sapiens OX=9606 GN=CYB5R1 PE=1 SV=1	1	15	15	15	60.3	34.094	430510000	376150000	228510000	240930000	194270000	234070000	204420000	179630000	268550000	177730000	294074000	212880000	1.38141	-	0.137432
Q92879	CELF1	sp|Q92879|CELF1_HUMAN CUGBP Elav-like family member 1 OS=Homo sapiens OX=9606 GN=CELF1 PE=1 SV=2	1	4	4	3	9.3	52.063		128470000	167560000	213480000	70554000	104140000	127260000		83571000		145016000	1.0499e+08	1.38123	-	0.33308
P06132	UROD	sp|P06132|DCUP_HUMAN Uroporphyrinogen decarboxylase OS=Homo sapiens OX=9606 GN=UROD PE=1 SV=2	1	5	5	5	20.2	40.786	88584000	148460000	93116000	83797000	95891000	68244000	122500000	75281000	59295000	43994000	101969600	73862800	1.38053	-	0.151639
O94979	SEC31A	sp|O94979|SC31A_HUMAN Protein transport protein Sec31A OS=Homo sapiens OX=9606 GN=SEC31A PE=1 SV=3	1	22	22	22	19.3	133.01	519250000	535550000	609620000	748900000	788390000	426930000	563650000	533000000	414310000	382790000	640342000	464136000	1.37964	-	0.0272334
P24666	ACP1	sp|P24666|PPAC_HUMAN Low molecular weight phosphotyrosine protein phosphatase OS=Homo sapiens OX=9606 GN=ACP1 PE=1 SV=3	1	5	5	5	36.7	18.042	69147000	175610000	194260000	186330000	107250000	105540000	127060000	78997000	121890000	97684000	146519400	106234200	1.37921	-	0.162761
O75165	DNAJC13	sp|O75165|DJC13_HUMAN DnaJ homolog subfamily C member 13 OS=Homo sapiens OX=9606 GN=DNAJC13 PE=1 SV=5	1	32	32	32	17.2	254.41	71593000	91172000	69120000	54927000	48214000	48017000	77216000	40708000	36674000	40317000	67005200	48586400	1.37909	-	0.117192
P34932	HSPA4	sp|P34932|HSP74_HUMAN Heat shock 70 kDa protein 4 OS=Homo sapiens OX=9606 GN=HSPA4 PE=1 SV=4	1	37	37	35	51.4	94.33	315070000	314190000	288650000	407190000	285370000	258770000	260780000	219870000	246920000	181810000	322094000	233630000	1.37865	-	0.0106149
P30876	POLR2B	sp|P30876|RPB2_HUMAN DNA-directed RNA polymerase II subunit RPB2 OS=Homo sapiens OX=9606 GN=POLR2B PE=1 SV=1	1	21	21	21	21	133.9	87616000	105050000	64096000	73214000	53706000	52803000	95917000	31942000	54864000	42884000	76736400	55682000	1.37812	-	0.173807
P62306	SNRPF	sp|P62306|RUXF_HUMAN Small nuclear ribonucleoprotein F OS=Homo sapiens OX=9606 GN=SNRPF PE=1 SV=1	1	4	4	4	40.7	9.7251	99154000	107070000	94185000	128790000	72666000	84841000	73305000			60359000	100373000	72835000	1.37809	-	0.0820055
Q15165	PON2	sp|Q15165|PON2_HUMAN Serum paraoxonase/arylesterase 2 OS=Homo sapiens OX=9606 GN=PON2 PE=1 SV=4	1	5	5	5	27.7	39.38	115530000	79985000	99270000	151580000	59361000	70675000	42033000	88047000	51262000	115100000	101145200	73423400	1.37756	-	0.212714
Q96G23	CERS2	sp|Q96G23|CERS2_HUMAN Ceramide synthase 2 OS=Homo sapiens OX=9606 GN=CERS2 PE=1 SV=1	1	5	5	5	16.3	44.876	124710000	185790000	140880000	322060000	146590000	144420000	193850000	62659000	149960000	117430000	184006000	133663800	1.37663	-	0.264139
P22234	PAICS	sp|P22234|PUR6_HUMAN Bifunctional phosphoribosylaminoimidazole carboxylase/phosphoribosylaminoimidazole succinocarboxamide synthetase OS=Homo sapiens OX=9606 GN=PAICS PE=1 SV=3	1	14	14	14	40.2	47.079	381140000	553180000	343520000	589480000	269020000	312320000	421450000	315430000	309250000	193570000	427268000	310404000	1.37649	-	0.141
Q8IVF2	AHNAK2	sp|Q8IVF2|AHNK2_HUMAN Protein AHNAK2 OS=Homo sapiens OX=9606 GN=AHNAK2 PE=1 SV=2	1	57	56	56	27.2	616.62	1975200000	999730000	769670000	1085000000	942750000	823790000	799780000	1018400000	667150000	884770000	1154470000	838778000	1.37637	-	0.187747
P51149	RAB7A	sp|P51149|RAB7A_HUMAN Ras-related protein Rab-7a OS=Homo sapiens OX=9606 GN=RAB7A PE=1 SV=1	1	17	17	17	80.2	23.489	691520000	1210400000	483940000	683160000	533280000	449830000	1019400000	241860000	550050000	356430000	720460000	523514000	1.3762	-	0.320789
Q6P1N0	CC2D1A	sp|Q6P1N0|C2D1A_HUMAN Coiled-coil and C2 domain-containing protein 1A OS=Homo sapiens OX=9606 GN=CC2D1A PE=1 SV=1	1	24	24	24	30.1	104.06	186120000	128740000	234640000	173940000	60462000	91607000	136660000	115640000	43917000	181960000	156780400	113956800	1.37579	-	0.284126
Q9NYU2	UGGT1	sp|Q9NYU2|UGGG1_HUMAN UDP-glucose:glycoprotein glucosyltransferase 1 OS=Homo sapiens OX=9606 GN=UGGT1 PE=1 SV=3	1	45	45	41	36.1	177.19	330010000	326510000	362640000	435790000	280970000	187450000	330090000	263010000	306030000	175190000	347184000	252354000	1.37578	-	0.0462434
P30101	PDIA3	sp|P30101|PDIA3_HUMAN Protein disulfide-isomerase A3 OS=Homo sapiens OX=9606 GN=PDIA3 PE=1 SV=4	1	34	34	34	58	56.782	2290100000	2392300000	1565700000	2352900000	2044500000	1569200000	1881400000	1134400000	1888500000	1269500000	2129100000	1548600000	1.37485	-	0.0284018
Q7L523;Q5VZM2	RRAGA; RRAGB	sp|Q7L523|RRAGA_HUMAN Ras-related GTP-binding protein A OS=Homo sapiens OX=9606 GN=RRAGA PE=1 SV=1;sp|Q5VZM2|RRAGB_HUMAN Ras-related GTP-binding protein B OS=Homo sapiens OX=9606 GN=RRAGB PE=1 SV=1	2	7	7	7	26.8	36.566	98396000	66931000	60375000	59169000	56805000	49426000	44403000	50057000	52851000	51792000	68335200	49705800	1.37479	-	0.0447571
Q5H9R7	PPP6R3	sp|Q5H9R7|PP6R3_HUMAN Serine/threonine-protein phosphatase 6 regulatory subunit 3 OS=Homo sapiens OX=9606 GN=PPP6R3 PE=1 SV=2	1	5	5	5	6.1	97.668	255810000	239650000	270320000	196510000	338680000	178070000	187580000	140370000	195130000	245350000	260194000	189300000	1.37451	-	0.0386299
P49257	LMAN1	sp|P49257|LMAN1_HUMAN Protein ERGIC-53 OS=Homo sapiens OX=9606 GN=LMAN1 PE=1 SV=2	1	18	18	18	34.7	57.548	655190000	501690000	490640000	500020000	575330000	435150000	464990000	236140000	592080000	253030000	544574000	396278000	1.37422	-	0.0813004
O00629	KPNA4	sp|O00629|IMA3_HUMAN Importin subunit alpha-3 OS=Homo sapiens OX=9606 GN=KPNA4 PE=1 SV=1	1	7	7	6	22.1	57.886	188410000	143570000	109800000	81323000	59937000	118290000	94613000	64547000	53714000	93218000	116608000	84876400	1.37386	-	0.249343
Q9UNM6	PSMD13	sp|Q9UNM6|PSD13_HUMAN 26S proteasome non-ATPase regulatory subunit 13 OS=Homo sapiens OX=9606 GN=PSMD13 PE=1 SV=2	1	12	12	12	30.9	42.945	267920000	304740000	249690000	317700000	270530000	228560000	263790000	158760000	248940000	126700000	282116000	205350000	1.37383	-	0.0314011
Q6PGP7	SKIC3	sp|Q6PGP7|SKI3_HUMAN SKI3 subunit of superkiller complex protein OS=Homo sapiens OX=9606 GN=SKIC3 PE=1 SV=1	1	15	15	15	13.1	175.48	36889000	21550000	29463000	26238000	25759000	20146000	18643000	15768000	27676000	19662000	27979800	20379000	1.37297	-	0.0465777
Q13148	TARDBP	sp|Q13148|TADBP_HUMAN TAR DNA-binding protein 43 OS=Homo sapiens OX=9606 GN=TARDBP PE=1 SV=1	1	6	6	6	11.4	44.739	320220000	198430000	188890000	234770000	85624000	75541000	196620000		186500000	140370000	205586800	149757750	1.3728	-	0.29503
Q8NI36	WDR36	sp|Q8NI36|WDR36_HUMAN WD repeat-containing protein 36 OS=Homo sapiens OX=9606 GN=WDR36 PE=1 SV=1	1	11	11	11	12.8	105.32	24952000	42178000	41212000	41751000	27891000	22679000	29843000		25293000		35596800	2.59383e+07	1.37236	-	0.116191
O43818	RRP9	sp|O43818|U3IP2_HUMAN U3 small nucleolar RNA-interacting protein 2 OS=Homo sapiens OX=9606 GN=RRP9 PE=1 SV=1	1	8	8	8	18.3	51.84	48652000	55807000	52158000	29878000	32920000	26344000	41345000	39208000	32276000	20781000	43883000	31990800	1.37174	-	0.105044
O75190;Q8WWF6;Q8NHS0	DNAJB6	sp|O75190|DNJB6_HUMAN DnaJ homolog subfamily B member 6 OS=Homo sapiens OX=9606 GN=DNAJB6 PE=1 SV=2	3	7	7	6	25.2	36.087	71980000	74908000	48396000	72231000	48574000	54056000	52249000	33030000	43359000	47740000	63217800	46086800	1.37171	-	0.0425381
Q99973	TEP1	sp|Q99973|TEP1_HUMAN Telomerase protein component 1 OS=Homo sapiens OX=9606 GN=TEP1 PE=1 SV=2	1	7	7	7	3.3	290.49	83774000	63095000	56233000	28279000	32581000	30886000	41859000		42746000		52792400	38497000	1.37134	-	0.343497
P07910;O60812;B7ZW38;B2RXH8;P0DMR1;Q86SE5	HNRNPC; HNRNPCL1	sp|P07910|HNRPC_HUMAN Heterogeneous nuclear ribonucleoproteins C1/C2 OS=Homo sapiens OX=9606 GN=HNRNPC PE=1 SV=4;sp|O60812|HNRC1_HUMAN Heterogeneous nuclear ribonucleoprotein C-like 1 OS=Homo sapiens OX=9606 GN=HNRNPCL1 PE=1 SV=1;sp|B7ZW38|HNRC3_HUMAN Hete	6	15	15	15	38.6	33.67	1110200000	980060000	1311200000	1643100000	791800000	1211300000	983680000	612880000	913180000	537390000	1167272000	851686000	1.37054	-	0.13781
Q96BM9	ARL8A	sp|Q96BM9|ARL8A_HUMAN ADP-ribosylation factor-like protein 8A OS=Homo sapiens OX=9606 GN=ARL8A PE=1 SV=1	1	7	7	4	47.8	21.416	638540000	427510000	336720000	325210000	350440000	358080000	322450000	282770000	306140000	247410000	415684000	303370000	1.37022	-	0.10477
O14579	COPE	sp|O14579|COPE_HUMAN Coatomer subunit epsilon OS=Homo sapiens OX=9606 GN=COPE PE=1 SV=3	1	9	9	9	38.3	34.482	280160000	250910000	211800000	317580000	275770000	197580000	254230000	195170000	221110000	108580000	267244000	195334000	1.36814	-	0.0423835
P05023;Q13733;P20648	ATP1A1	sp|P05023|AT1A1_HUMAN Sodium/potassium-transporting ATPase subunit alpha-1 OS=Homo sapiens OX=9606 GN=ATP1A1 PE=1 SV=1	3	38	38	26	39.2	112.89	1400600000	2263700000	1262500000	1514800000	1001100000	1293100000	1514200000	680730000	1164500000	790000000	1488540000	1088506000	1.36751	-	0.166585
Q16270	IGFBP7	sp|Q16270|IBP7_HUMAN Insulin-like growth factor-binding protein 7 OS=Homo sapiens OX=9606 GN=IGFBP7 PE=1 SV=1	1	6	6	6	28	29.13	17441000	16515000	36367000	31025000	26978000	15585000	21729000	22102000	19809000	14616000	25665200	18768200	1.36748	-	0.135216
Q15907;P62491	RAB11B; RAB11A	sp|Q15907|RB11B_HUMAN Ras-related protein Rab-11B OS=Homo sapiens OX=9606 GN=RAB11B PE=1 SV=4;sp|P62491|RB11A_HUMAN Ras-related protein Rab-11A OS=Homo sapiens OX=9606 GN=RAB11A PE=1 SV=3	2	10	10	9	42.2	24.488	986260000	894400000	792880000	1173600000	954070000	696860000	943050000	414180000	821200000	636730000	960242000	702404000	1.36708	-	0.0457086
O75821	EIF3G	sp|O75821|EIF3G_HUMAN Eukaryotic translation initiation factor 3 subunit G OS=Homo sapiens OX=9606 GN=EIF3G PE=1 SV=2	1	10	10	10	23.4	35.611	456850000	388470000	410370000	554580000	217220000	224290000	497100000		310620000	154580000	405498000	296647500	1.36694	-	0.266473
P51858	HDGF	sp|P51858|HDGF_HUMAN Hepatoma-derived growth factor OS=Homo sapiens OX=9606 GN=HDGF PE=1 SV=1	1	15	15	14	69.6	26.788	1094600000	1264900000	1113300000	1303300000	918230000	1117100000	937290000	571290000	810350000	729910000	1138866000	833188000	1.36688	-	0.0291033
Q07866	KLC1	sp|Q07866|KLC1_HUMAN Kinesin light chain 1 OS=Homo sapiens OX=9606 GN=KLC1 PE=1 SV=2	1	16	16	11	28.3	65.309	143000000	88907000	157530000	138050000	97245000	109420000	69562000	103390000	93226000	81481000	124946400	91415800	1.36679	-	0.0595771
Q96K17	BTF3L4	sp|Q96K17|BT3L4_HUMAN Transcription factor BTF3 homolog 4 OS=Homo sapiens OX=9606 GN=BTF3L4 PE=1 SV=1	1	4	4	4	26.6	17.27	362930000	239650000	259620000	580810000	133490000	214430000	457240000		143120000	108040000	315300000	230707500	1.36667	-	0.467847
Q9UI10	EIF2B4	sp|Q9UI10|EI2BD_HUMAN Translation initiation factor eIF-2B subunit delta OS=Homo sapiens OX=9606 GN=EIF2B4 PE=1 SV=2	1	8	8	8	19.3	57.557	34453000	67108000	56386000	64874000	43569000	38029000	54669000		33241000	29997000	53278000	38984000	1.36666	-	0.139599
P78537	BLOC1S1	sp|P78537|BL1S1_HUMAN Biogenesis of lysosome-related organelles complex 1 subunit 1 OS=Homo sapiens OX=9606 GN=BLOC1S1 PE=1 SV=2	1	3	3	3	20.9	17.262	60795000	57749000		39201000		26369000	66074000		42025000	19446000	5.25817e+07	38478500	1.36652	-	0.343183
Q9Y5K5	UCHL5	sp|Q9Y5K5|UCHL5_HUMAN Ubiquitin carboxyl-terminal hydrolase isozyme L5 OS=Homo sapiens OX=9606 GN=UCHL5 PE=1 SV=3	1	7	7	7	22.8	37.606	69700000	59800000	46445000	72921000	38085000	37273000	55699000		33091000		57390200	42021000	1.36575	-	0.184177
Q96AX1	VPS33A	sp|Q96AX1|VP33A_HUMAN Vacuolar protein sorting-associated protein 33A OS=Homo sapiens OX=9606 GN=VPS33A PE=1 SV=1	1	11	11	11	21	67.61	73232000	49538000	55092000	69388000	57261000	58197000	62702000	37872000	30751000	33514000	60902200	44607200	1.3653	-	0.0753578
Q96JG6	VPS50	sp|Q96JG6|VPS50_HUMAN Syndetin OS=Homo sapiens OX=9606 GN=VPS50 PE=1 SV=3	1	7	7	7	10.8	111.17	43596000	37553000	30336000	22251000	22448000	19977000	23705000	23155000	28396000	19197000	31236800	22886000	1.36489	-	0.100452
P26196	DDX6	sp|P26196|DDX6_HUMAN Probable ATP-dependent RNA helicase DDX6 OS=Homo sapiens OX=9606 GN=DDX6 PE=1 SV=2	1	11	11	11	32.9	54.416	251720000	446240000	214720000	298680000	241710000	199260000	269690000	193970000	238530000	163250000	290614000	212940000	1.36477	-	0.123955
P50213	IDH3A	sp|P50213|IDH3A_HUMAN Isocitrate dehydrogenase [NAD] subunit alpha, mitochondrial OS=Homo sapiens OX=9606 GN=IDH3A PE=1 SV=1	1	13	13	13	37.7	39.591	526080000	440350000	403480000	631690000	311450000	365370000	446560000	299010000	356740000	227390000	462610000	339014000	1.36457	-	0.0963401
Q9NZL9	MAT2B	sp|Q9NZL9|MAT2B_HUMAN Methionine adenosyltransferase 2 subunit beta OS=Homo sapiens OX=9606 GN=MAT2B PE=1 SV=1	1	12	12	12	36.5	37.551	1078600000	1125000000	1066000000	1158700000	765200000	788110000	966330000		844700000	448580000	1038700000	761930000	1.36325	-	0.0638557
Q96EP5	DAZAP1	sp|Q96EP5|DAZP1_HUMAN DAZ-associated protein 1 OS=Homo sapiens OX=9606 GN=DAZAP1 PE=1 SV=1	1	4	4	4	18.4	43.383	624320000	556760000	336590000	336470000	292850000	348210000	422390000	210370000	279220000		429398000	315047500	1.36296	-	0.225186
P62917	RPL8	sp|P62917|RL8_HUMAN 60S ribosomal protein L8 OS=Homo sapiens OX=9606 GN=RPL8 PE=1 SV=2	1	13	13	13	55.6	28.024	1027100000	1444500000	763670000	1494300000	646860000	812540000	1235100000	571990000	898610000	428750000	1075286000	789398000	1.36216	-	0.233309
P18077	RPL35A	sp|P18077|RL35A_HUMAN 60S ribosomal protein L35a OS=Homo sapiens OX=9606 GN=RPL35A PE=1 SV=2	1	6	6	6	39.1	12.538	1192600000	778950000	573970000	1542000000	141640000	514630000	1093500000	328610000	797510000	371490000	845832000	621148000	1.36172	-	0.448889
P25490;O15391;Q96MM3	YY1; YY2	sp|P25490|TYY1_HUMAN Transcriptional repressor protein YY1 OS=Homo sapiens OX=9606 GN=YY1 PE=1 SV=2;sp|O15391|TYY2_HUMAN Transcription factor YY2 OS=Homo sapiens OX=9606 GN=YY2 PE=2 SV=1	3	5	5	5	14	44.712	86799000	63770000	61196000	47800000		62158000	47841000		45462000	35249000	64891250	47677500	1.36105	-	0.130008
O00487	PSMD14	sp|O00487|PSDE_HUMAN 26S proteasome non-ATPase regulatory subunit 14 OS=Homo sapiens OX=9606 GN=PSMD14 PE=1 SV=1	1	5	5	5	21.3	34.577	265050000	275870000	250200000	265970000	218580000	218890000	247990000	174740000	154560000	141370000	255134000	187510000	1.36064	-	0.0165534
Q92614	MYO18A	sp|Q92614|MY18A_HUMAN Unconventional myosin-XVIIIa OS=Homo sapiens OX=9606 GN=MYO18A PE=1 SV=3	1	30	30	30	20.2	233.11	76040000	93213000	64184000	68839000	50578000	40095000	92279000	42293000	55713000	29015000	70570800	51879000	1.3603	-	0.188801
P20701	ITGAL	sp|P20701|ITAL_HUMAN Integrin alpha-L OS=Homo sapiens OX=9606 GN=ITGAL PE=1 SV=3	1	6	6	6	6.8	128.77	99398000	144170000	57178000	31132000	86209000	33037000	118950000		32520000		83617400	6.15023e+07	1.35958	-	0.528916
Q9H845	ACAD9	sp|Q9H845|ACAD9_HUMAN Complex I assembly factor ACAD9, mitochondrial OS=Homo sapiens OX=9606 GN=ACAD9 PE=1 SV=1	1	18	18	18	32.7	68.76	142650000	247870000	221330000	145240000	92259000	121980000	186080000	90795000	142380000	83572000	169869800	124961400	1.35938	-	0.22228
Q99832	CCT7	sp|Q99832|TCPH_HUMAN T-complex protein 1 subunit eta OS=Homo sapiens OX=9606 GN=CCT7 PE=1 SV=2	1	23	23	23	50.8	59.366	383960000	555320000	486310000	507510000	345920000	376370000	358280000	313910000	366840000	261500000	455804000	335380000	1.35907	-	0.0271755
O43390	HNRNPR	sp|O43390|HNRPR_HUMAN Heterogeneous nuclear ribonucleoprotein R OS=Homo sapiens OX=9606 GN=HNRNPR PE=1 SV=1	1	27	27	21	45.3	70.942	947150000	1064100000	1022800000	1017900000	623810000	924230000	859640000	443430000	760180000	453160000	935152000	688128000	1.35898	-	0.0921806
A0AVT1	UBA6	sp|A0AVT1|UBA6_HUMAN Ubiquitin-like modifier-activating enzyme 6 OS=Homo sapiens OX=9606 GN=UBA6 PE=1 SV=1	1	27	27	27	35.4	117.97	192360000	278260000	249920000	355940000	229480000	210970000	268070000	160430000	179980000	142000000	261192000	192290000	1.35832	-	0.086761
Q9P260	RELCH	sp|Q9P260|RELCH_HUMAN RAB11-binding protein RELCH OS=Homo sapiens OX=9606 GN=RELCH PE=1 SV=2	1	13	13	13	12.2	134.63	73444000	80757000	20787000	11287000	23966000	19089000	29582000	74758000	11394000	20036000	42048200	30971800	1.35763	-	0.563894
P55036;A2A3N6	PSMD4; PIPSL	sp|P55036|PSMD4_HUMAN 26S proteasome non-ATPase regulatory subunit 4 OS=Homo sapiens OX=9606 GN=PSMD4 PE=1 SV=1;sp|A2A3N6|PIPSL_HUMAN Putative PIP5K1A and PSMD4-like protein OS=Homo sapiens OX=9606 GN=PIPSL PE=5 SV=1	2	6	6	6	16.7	40.736	261190000	206900000	214950000	352980000	151500000	167640000	200190000	145350000	222650000	139530000	237504000	175072000	1.35661	-	0.132759
P49458	SRP9	sp|P49458|SRP09_HUMAN Signal recognition particle 9 kDa protein OS=Homo sapiens OX=9606 GN=SRP9 PE=1 SV=2	1	5	5	5	53.5	10.112	685940000	1004200000	1109300000	699110000	497060000	725100000	809450000	326320000	597580000	487390000	799122000	589168000	1.35636	-	0.175391
Q8N3F8	MICALL1	sp|Q8N3F8|MILK1_HUMAN MICAL-like protein 1 OS=Homo sapiens OX=9606 GN=MICALL1 PE=1 SV=2	1	5	5	4	7	93.44	48498000	33647000	45304000	62463000	31597000	30145000	33537000			34343000	44301800	32675000	1.35583	-	0.172204
P19474	TRIM21	sp|P19474|RO52_HUMAN E3 ubiquitin-protein ligase TRIM21 OS=Homo sapiens OX=9606 GN=TRIM21 PE=1 SV=1	1	9	9	9	24	54.169	94253000	72202000	96828000	185940000	78351000	60493000	74385000	52207000	124250000		105514800	77833750	1.35564	-	0.345303
Q15269	PWP2	sp|Q15269|PWP2_HUMAN Periodic tryptophan protein 2 homolog OS=Homo sapiens OX=9606 GN=PWP2 PE=1 SV=2	1	7	7	7	9.8	102.45	15805000	26517000	23720000	27724000	8749700	11860000	14169000		19352000		20503140	15127000	1.3554	-	0.32911
Q16799	RTN1	sp|Q16799|RTN1_HUMAN Reticulon-1 OS=Homo sapiens OX=9606 GN=RTN1 PE=1 SV=1	1	3	3	3	3.7	83.617		401790000	360510000		376260000	288870000	191030000	418560000	221790000		379520000	280062500	1.35513	-	0.161526
P42892	ECE1	sp|P42892|ECE1_HUMAN Endothelin-converting enzyme 1 OS=Homo sapiens OX=9606 GN=ECE1 PE=1 SV=2	1	6	6	6	11.2	87.163	153880000	125760000	260000000	131390000	127640000	196870000	96843000	92389000	114230000	89149000	159734000	117896200	1.35487	-	0.235193
Q6ZT62	BARGIN	sp|Q6ZT62|BGIN_HUMAN Bargin OS=Homo sapiens OX=9606 GN=BARGIN PE=1 SV=2	1	15	15	0	24.2	73.599	133160000	195280000	134460000	100720000	100150000	87048000	269170000	61360000	50499000	21989000	132754000	98013200	1.35445	-	0.483871
P08754	GNAI3	sp|P08754|GNAI3_HUMAN Guanine nucleotide-binding protein G(i) subunit alpha-3 OS=Homo sapiens OX=9606 GN=GNAI3 PE=1 SV=3	1	13	6	6	39.5	40.532	363900000	469410000	318400000	373370000	397180000	353950000	335350000	131000000	305590000	293570000	384452000	283892000	1.35422	-	0.063853
Q15031	LARS2	sp|Q15031|SYLM_HUMAN Leucine--tRNA ligase, mitochondrial OS=Homo sapiens OX=9606 GN=LARS2 PE=1 SV=2	1	6	6	6	7.2	101.97	21355000	21593000	29669000	16166000		15985000	18956000		14235000		22195750	16392000	1.35406	-	0.15764
Q2M389	WASHC4	sp|Q2M389|WASC4_HUMAN WASH complex subunit 4 OS=Homo sapiens OX=9606 GN=WASHC4 PE=1 SV=2	1	13	13	13	12.4	136.4	53116000	36779000	30412000	54590000	52008000	39390000	27872000		33630000	33172000	45381000	33516000	1.35401	-	0.0869193
Q15904	ATP6AP1	sp|Q15904|VAS1_HUMAN V-type proton ATPase subunit S1 OS=Homo sapiens OX=9606 GN=ATP6AP1 PE=1 SV=2	1	6	6	6	14.5	52.025	119400000	74468000		79930000	51555000	56061000	53893000	74310000	56077000		81338250	60085250	1.35371	-	0.203194
P78371	CCT2	sp|P78371|TCPB_HUMAN T-complex protein 1 subunit beta OS=Homo sapiens OX=9606 GN=CCT2 PE=1 SV=4	1	28	28	28	57.6	57.488	720720000	765960000	755950000	818660000	543630000	569560000	600640000	472980000	589750000	431060000	720984000	532798000	1.3532	-	0.0118334
Q14690	PDCD11	sp|Q14690|RRP5_HUMAN Protein RRP5 homolog OS=Homo sapiens OX=9606 GN=PDCD11 PE=1 SV=3	1	13	13	13	7.7	208.7	28331000	45128000	45772000	45795000	24017000	26260000	34634000		22931000		37808600	2.79417e+07	1.35313	-	0.201898
Q8N9N2	ASCC1	sp|Q8N9N2|ASCC1_HUMAN Activating signal cointegrator 1 complex subunit 1 OS=Homo sapiens OX=9606 GN=ASCC1 PE=1 SV=1	1	2	2	2	4.2	45.509	60122000	37748000	42092000	60257000	41987000	33367000	32749000		41288000		48441200	3.58013e+07	1.35306	-	0.111718
Q13303;Q14722	KCNAB2	sp|Q13303|KCAB2_HUMAN Voltage-gated potassium channel subunit beta-2 OS=Homo sapiens OX=9606 GN=KCNAB2 PE=1 SV=2	2	9	9	9	36.5	41	69272000	94307000	87228000	81748000	72436000	47598000	79249000	71535000	57032000	44051000	80998200	59893000	1.35238	-	0.0330804
Q99714	HSD17B10	sp|Q99714|HCD2_HUMAN 3-hydroxyacyl-CoA dehydrogenase type-2 OS=Homo sapiens OX=9606 GN=HSD17B10 PE=1 SV=3	1	13	13	13	66.7	26.923	975170000	610210000	510620000	879190000	432530000	556460000	545310000	527760000	478920000	411380000	681544000	503966000	1.35236	-	0.140614
Q08AF3	SLFN5	sp|Q08AF3|SLFN5_HUMAN Schlafen family member 5 OS=Homo sapiens OX=9606 GN=SLFN5 PE=1 SV=1	1	10	10	9	14.1	101.05	60890000	75364000	42528000	49948000	75254000	43917000	65679000	47065000	44761000	23557000	60796800	44995800	1.35117	-	0.131126
Q14376	GALE	sp|Q14376|GALE_HUMAN UDP-glucose 4-epimerase OS=Homo sapiens OX=9606 GN=GALE PE=1 SV=2	1	7	7	7	21.3	38.281	173700000	555440000	260840000	460260000	642540000	149020000	454950000	297470000	267000000	380960000	418556000	309880000	1.3507	-	0.319247
P12074	COX6A1	sp|P12074|CX6A1_HUMAN Cytochrome c oxidase subunit 6A1, mitochondrial OS=Homo sapiens OX=9606 GN=COX6A1 PE=1 SV=4	1	2	2	2	43.1	12.155	252690000	311190000	237460000	260640000	188590000	120410000	232940000		167390000	220000000	250114000	185185000	1.35062	-	0.0810218
P14406	COX7A2	sp|P14406|CX7A2_HUMAN Cytochrome c oxidase subunit 7A2, mitochondrial OS=Homo sapiens OX=9606 GN=COX7A2 PE=1 SV=1	1	2	2	2	27.7	9.3959	655980000	816050000	694800000	786180000			840710000	324030000	476440000		738252500	547060000	1.34949	-	0.218061
Q9UJZ1	STOML2	sp|Q9UJZ1|STML2_HUMAN Stomatin-like protein 2, mitochondrial OS=Homo sapiens OX=9606 GN=STOML2 PE=1 SV=1	1	8	8	8	28.1	38.534	93853000	95813000	117940000	164630000	70791000	84381000	65595000	120950000	67245000	64307000	108605400	80495600	1.34921	-	0.180692
P49841	GSK3B	sp|P49841|GSK3B_HUMAN Glycogen synthase kinase-3 beta OS=Homo sapiens OX=9606 GN=GSK3B PE=1 SV=2	1	13	13	8	35.2	46.744	358370000	451750000	334220000	384190000	257260000	262160000	352760000	267090000	175340000	266320000	357158000	264734000	1.34912	-	0.0608371
Q15118	PDK1	sp|Q15118|PDK1_HUMAN [Pyruvate dehydrogenase (acetyl-transferring)] kinase isozyme 1, mitochondrial OS=Homo sapiens OX=9606 GN=PDK1 PE=1 SV=1	1	6	6	6	18.6	49.244	34461000	22055000	28338000	19798000	29055000	20638000	18133000		20716000		26741400	19829000	1.3486	-	0.0996462
P56377	AP1S2	sp|P56377|AP1S2_HUMAN AP-1 complex subunit sigma-2 OS=Homo sapiens OX=9606 GN=AP1S2 PE=1 SV=1	1	4	4	3	27.4	18.615	72170000	62244000	51349000	47663000	41059000	41116000	50814000		30192000		54897000	4.07073e+07	1.34858	-	0.147903
P19338	NCL	sp|P19338|NUCL_HUMAN Nucleolin OS=Homo sapiens OX=9606 GN=NCL PE=1 SV=3	1	28	28	28	31.1	76.613	1901900000	2046800000	1928400000	2606900000	1586800000	2305300000	1534700000	524050000	2045500000	1058300000	2014160000	1493570000	1.34855	-	0.190514
Q8WXF1	PSPC1	sp|Q8WXF1|PSPC1_HUMAN Paraspeckle component 1 OS=Homo sapiens OX=9606 GN=PSPC1 PE=1 SV=1	1	11	11	11	21.4	58.743	625050000	443320000	416060000	455510000	475970000	379760000	419550000	190770000	541800000	260690000	483182000	358514000	1.34774	-	0.119808
Q8N3D4	EHBP1L1	sp|Q8N3D4|EH1L1_HUMAN EH domain-binding protein 1-like protein 1 OS=Homo sapiens OX=9606 GN=EHBP1L1 PE=1 SV=2	1	7	7	5	5.4	161.85	294340000	268450000	161190000	132470000	137120000	120280000	160160000		107280000	202480000	198714000	147550000	1.34676	-	0.275746
P61026	RAB10	sp|P61026|RAB10_HUMAN Ras-related protein Rab-10 OS=Homo sapiens OX=9606 GN=RAB10 PE=1 SV=1	1	7	6	6	37.5	22.541	410970000	632510000	325040000	339620000	396980000	313630000	424540000	232620000	378350000	214210000	421024000	312670000	1.34654	-	0.152985
P09110	ACAA1	sp|P09110|THIK_HUMAN 3-ketoacyl-CoA thiolase, peroxisomal OS=Homo sapiens OX=9606 GN=ACAA1 PE=1 SV=2	1	9	9	9	32.3	44.292	117610000	74426000	61268000	49987000	39372000	36813000	67657000		48282000		68532600	5.09173e+07	1.34596	-	0.395843
Q13637	RAB32	sp|Q13637|RAB32_HUMAN Ras-related protein Rab-32 OS=Homo sapiens OX=9606 GN=RAB32 PE=1 SV=3	1	6	6	5	31.6	24.997	72588000	89041000	58388000	45972000	96808000	44484000	74686000		59332000	37139000	72559400	53910250	1.34593	-	0.192259
P49720	PSMB3	sp|P49720|PSB3_HUMAN Proteasome subunit beta type-3 OS=Homo sapiens OX=9606 GN=PSMB3 PE=1 SV=2	1	9	9	9	43.4	22.949	394100000	395570000	307780000	457700000	333950000	231540000	457390000	195640000	347220000	171990000	377820000	280756000	1.34572	-	0.141712
P13797	PLS3	sp|P13797|PLST_HUMAN Plastin-3 OS=Homo sapiens OX=9606 GN=PLS3 PE=1 SV=4	1	30	23	22	52.4	70.81	599430000	448240000	442910000	836240000	417140000	540510000	588190000	270760000	352920000	287330000	548792000	407942000	1.34527	-	0.206833
Q9BZZ5	API5	sp|Q9BZZ5|API5_HUMAN Apoptosis inhibitor 5 OS=Homo sapiens OX=9606 GN=API5 PE=1 SV=3	1	12	12	12	26.9	59.004	298470000	344030000	296010000	344370000	231310000	319280000	292600000		155940000	134010000	302838000	225457500	1.34322	-	0.147385
P23588	EIF4B	sp|P23588|IF4B_HUMAN Eukaryotic translation initiation factor 4B OS=Homo sapiens OX=9606 GN=EIF4B PE=1 SV=2	1	5	5	5	11.9	69.15	229260000	196090000	277330000	357930000	209270000	202830000	159510000	136960000	257090000		253976000	189097500	1.3431	-	0.154604
Q92973	TNPO1	sp|Q92973|TNPO1_HUMAN Transportin-1 OS=Homo sapiens OX=9606 GN=TNPO1 PE=1 SV=2	1	15	15	10	20.6	102.35	228880000	240490000	275950000	228170000	229930000	198630000	182460000	169880000	180490000	164670000	240684000	179226000	1.34291	-	0.000466055
P78346	RPP30	sp|P78346|RPP30_HUMAN Ribonuclease P protein subunit p30 OS=Homo sapiens OX=9606 GN=RPP30 PE=1 SV=1	1	5	5	5	33.2	29.321	43672000	44914000	56856000	38622000	37729000	27215000	45194000		26709000		44358600	3.30393e+07	1.3426	-	0.125588
P50991	CCT4	sp|P50991|TCPD_HUMAN T-complex protein 1 subunit delta OS=Homo sapiens OX=9606 GN=CCT4 PE=1 SV=4	1	23	23	23	47.3	57.924	1348800000	1673200000	1514700000	1561800000	1076500000	1133900000	1324900000	963030000	1062300000	862790000	1435000000	1069384000	1.34189	-	0.0228475
P01040	CSTA	sp|P01040|CYTA_HUMAN Cystatin-A OS=Homo sapiens OX=9606 GN=CSTA PE=1 SV=1	1	9	9	9	76.5	11.006	1547100000	1539400000	149210000	1280600000	1019300000	756690000	3028700000	115940000	157540000	69452000	1107122000	825664400	1.34089	-	0.662485
Q7Z460	CLASP1	sp|Q7Z460|CLAP1_HUMAN CLIP-associating protein 1 OS=Homo sapiens OX=9606 GN=CLASP1 PE=1 SV=1	1	8	8	6	6.6	169.45	27496000	17193000	36178000	20677000	27017000	17026000	19345000		24122000	16211000	25712200	19176000	1.34085	-	0.147211
P12081	HARS1	sp|P12081|HARS1_HUMAN Histidine--tRNA ligase, cytoplasmic OS=Homo sapiens OX=9606 GN=HARS1 PE=1 SV=2	1	17	17	12	33.8	57.41	226320000	240230000	212610000	239510000	287050000	235410000	187780000	164040000	151050000	161070000	241144000	179870000	1.34066	-	0.0142844
P46459	NSF	sp|P46459|NSF_HUMAN Vesicle-fusing ATPase OS=Homo sapiens OX=9606 GN=NSF PE=1 SV=3	1	21	21	20	28.8	82.593	271580000	193960000	195670000	339780000	176010000	202110000	174010000	175340000	196410000	130190000	235400000	175612000	1.34046	-	0.110659
P51003;Q9NRJ5	PAPOLA	sp|P51003|PAPOA_HUMAN Poly(A) polymerase alpha OS=Homo sapiens OX=9606 GN=PAPOLA PE=1 SV=4	2	7	7	7	12.2	82.842	59135000	64198000		70491000	36629000	36876000	53948000		38209000		57613250	43011000	1.3395	-	0.198442
Q6UW68	TMEM205	sp|Q6UW68|TM205_HUMAN Transmembrane protein 205 OS=Homo sapiens OX=9606 GN=TMEM205 PE=1 SV=1	1	4	4	4	27	21.198	313900000	181450000	365150000	171450000	270140000	147090000	186220000	128690000	352880000	157260000	260418000	194428000	1.33941	-	0.267047
O75937	DNAJC8	sp|O75937|DNJC8_HUMAN DnaJ homolog subfamily C member 8 OS=Homo sapiens OX=9606 GN=DNAJC8 PE=1 SV=2	1	10	10	10	36.8	29.841	204590000	260220000	465060000	255260000	206090000	268720000	312760000	92470000	214610000	150270000	278244000	207766000	1.33922	-	0.291127
P49368	CCT3	sp|P49368|TCPG_HUMAN T-complex protein 1 subunit gamma OS=Homo sapiens OX=9606 GN=CCT3 PE=1 SV=4	1	28	28	28	51.2	60.533	1325500000	1819500000	1562100000	1714000000	998080000	1197400000	1381900000	923000000	1206800000	833780000	1483836000	1108576000	1.33851	-	0.0682951
Q15365	PCBP1	sp|Q15365|PCBP1_HUMAN Poly(rC)-binding protein 1 OS=Homo sapiens OX=9606 GN=PCBP1 PE=1 SV=2	1	9	9	8	40.7	37.497	1879700000	1161200000	1198700000	1394700000	896800000	1126600000	1338500000	655900000	989470000	769540000	1306220000	976002000	1.33834	-	0.145001
O75223	GGCT	sp|O75223|GGCT_HUMAN Gamma-glutamylcyclotransferase OS=Homo sapiens OX=9606 GN=GGCT PE=1 SV=1	1	6	6	6	42	21.007	420560000	296170000	143790000	207430000	107750000	235250000	296690000		79057000	91866000	235140000	175715750	1.33818	-	0.478447
Q14192	FHL2	sp|Q14192|FHL2_HUMAN Four and a half LIM domains protein 2 OS=Homo sapiens OX=9606 GN=FHL2 PE=1 SV=3	1	12	12	12	52	32.193	427880000	31293000	160070000	195300000	89159000	195030000	49109000	163880000	47454000	220090000	180740400	135112600	1.3377	-	0.570754
P14678;P63162	SNRPB; SNRPN	sp|P14678|RSMB_HUMAN Small nuclear ribonucleoprotein-associated proteins B and B OS=Homo sapiens OX=9606 GN=SNRPB PE=1 SV=2;sp|P63162|RSMN_HUMAN Small nuclear ribonucleoprotein-associated protein N OS=Homo sapiens OX=9606 GN=SNRPN PE=1 SV=1	2	8	8	8	25	24.61	774680000	920300000	632370000	856440000	361750000	552330000	773810000	336180000	616180000	372190000	709108000	530138000	1.33759	-	0.199175
O95166;Q9H0R8	GABARAP; GABARAPL1	sp|O95166|GBRAP_HUMAN Gamma-aminobutyric acid receptor-associated protein OS=Homo sapiens OX=9606 GN=GABARAP PE=1 SV=1;sp|Q9H0R8|GBRL1_HUMAN Gamma-aminobutyric acid receptor-associated protein-like 1 OS=Homo sapiens OX=9606 GN=GABARAPL1 PE=1 SV=1	2	2	2	1	15.4	13.918	276120000	338010000	299890000	331990000	264870000	303590000	153800000		209340000	236990000	302176000	225930000	1.33748	-	0.0484288
Q96SI9	STRBP	sp|Q96SI9|STRBP_HUMAN Spermatid perinuclear RNA-binding protein OS=Homo sapiens OX=9606 GN=STRBP PE=1 SV=1	1	8	4	4	11.2	73.652	392900000	482130000		406160000		337500000	373590000		247630000		4.27063e+08	3.19573e+08	1.33635	-	0.0825113
Q99623	PHB2	sp|Q99623|PHB2_HUMAN Prohibitin-2 OS=Homo sapiens OX=9606 GN=PHB2 PE=1 SV=2	1	15	15	15	53.8	33.296	1651500000	2747300000	2269200000	1834200000	1169400000	1524700000	1719600000	1149400000	1554400000	1289300000	1934320000	1447480000	1.33634	-	0.12888
Q9BRK5	SDF4	sp|Q9BRK5|CAB45_HUMAN 45 kDa calcium-binding protein OS=Homo sapiens OX=9606 GN=SDF4 PE=1 SV=1	1	5	5	5	19.1	41.806	46933000	93224000	70060000	63923000	43868000	33099000	60964000	36198000	60142000		63601600	47600750	1.33615	-	0.226254
Q9NQR4	NIT2	sp|Q9NQR4|NIT2_HUMAN Omega-amidase NIT2 OS=Homo sapiens OX=9606 GN=NIT2 PE=1 SV=1	1	13	13	13	64.5	30.608	125940000	237430000	95246000	114260000	91640000	101960000	182270000	63483000	85193000	64553000	132903200	99491800	1.33582	-	0.363255
P49757	NUMB	sp|P49757|NUMB_HUMAN Protein numb homolog OS=Homo sapiens OX=9606 GN=NUMB PE=1 SV=2	1	4	4	3	6.1	70.803	49073000	51496000	43534000	69257000	34457000	41593000	40636000		36795000	29469000	49563400	37123250	1.3351	-	0.115776
P04083	ANXA1	sp|P04083|ANXA1_HUMAN Annexin A1 OS=Homo sapiens OX=9606 GN=ANXA1 PE=1 SV=2	1	27	27	27	73.1	38.714	5918900000	10801000000	5361500000	3811900000	4849900000	3212900000	10567000000	2635200000	2938200000	3674900000	6148640000	4605640000	1.33502	-	0.447017
P37108	SRP14	sp|P37108|SRP14_HUMAN Signal recognition particle 14 kDa protein OS=Homo sapiens OX=9606 GN=SRP14 PE=1 SV=2	1	6	6	6	33.8	14.57	391640000	778010000	930300000	510090000	330390000	401470000	408390000	245510000	522770000	625230000	588086000	440674000	1.33451	-	0.294733
P57088	TMEM33	sp|P57088|TMM33_HUMAN Transmembrane protein 33 OS=Homo sapiens OX=9606 GN=TMEM33 PE=1 SV=2	1	8	8	8	30.4	27.978	92317000	210680000	100950000	111860000	73431000		197000000	41975000	71919000	42434000	117847600	88332000	1.33414	-	0.508302
P22033	MMUT	sp|P22033|MUTA_HUMAN Methylmalonyl-CoA mutase, mitochondrial OS=Homo sapiens OX=9606 GN=MMUT PE=1 SV=4	1	9	9	9	17.9	83.134	69487000	65145000	55914000	127440000	40010000	62846000	70744000	58566000	48612000	27748000	71599200	53703200	1.33324	-	0.312195
Q9Y371	SH3GLB1	sp|Q9Y371|SHLB1_HUMAN Endophilin-B1 OS=Homo sapiens OX=9606 GN=SH3GLB1 PE=1 SV=1	1	8	8	7	23.6	40.796	2402200000	2334300000	2302700000	2509400000	1110400000	1023400000	1447400000	2428200000	1576200000	1519700000	2131800000	1598980000	1.33322	-	0.160863
Q05048	CSTF1	sp|Q05048|CSTF1_HUMAN Cleavage stimulation factor subunit 1 OS=Homo sapiens OX=9606 GN=CSTF1 PE=1 SV=1	1	8	8	8	29	48.357	62413000	60913000	48987000	75376000	41394000	36093000	55776000		47735000	33874000	57816600	43369500	1.33312	-	0.114994
Q9NZ45	CISD1	sp|Q9NZ45|CISD1_HUMAN CDGSH iron-sulfur domain-containing protein 1 OS=Homo sapiens OX=9606 GN=CISD1 PE=1 SV=1	1	4	4	4	42.6	12.199	26416000	46820000	96467000	45313000	35718000	45452000	23371000		53431000	28262000	50146800	37629000	1.33266	-	0.43486
Q8TAT6	NPLOC4	sp|Q8TAT6|NPL4_HUMAN Nuclear protein localization protein 4 homolog OS=Homo sapiens OX=9606 GN=NPLOC4 PE=1 SV=3	1	17	17	17	33.2	68.119	57553000	102760000	84650000	208150000	89473000	68384000	110310000	85668000	94433000	48694000	108517200	81497800	1.33154	-	0.363863
Q13451	FKBP5	sp|Q13451|FKBP5_HUMAN Peptidyl-prolyl cis-trans isomerase FKBP5 OS=Homo sapiens OX=9606 GN=FKBP5 PE=1 SV=2	1	15	15	15	43.3	51.212	171590000	289530000	338430000	276100000	231930000	205860000	252610000	234410000	125940000	163600000	261516000	196484000	1.33098	-	0.112454
Q10713	PMPCA	sp|Q10713|MPPA_HUMAN Mitochondrial-processing peptidase subunit alpha OS=Homo sapiens OX=9606 GN=PMPCA PE=1 SV=2	1	7	7	7	19.4	58.252	97400000	108830000	97815000	86075000	65301000	49077000	95225000	59517000	69958000		91084200	68444250	1.33078	-	0.102688
O43660	PLRG1	sp|O43660|PLRG1_HUMAN Pleiotropic regulator 1 OS=Homo sapiens OX=9606 GN=PLRG1 PE=1 SV=1	1	10	10	10	27.6	57.193	52681000	89884000	96607000	122060000	61929000	66948000	89226000			34620000	84632200	63598000	1.33074	-	0.339097
Q96BY6	DOCK10	sp|Q96BY6|DOC10_HUMAN Dedicator of cytokinesis protein 10 OS=Homo sapiens OX=9606 GN=DOCK10 PE=1 SV=3	1	12	11	9	7.5	249.53	37750000	38876000	37124000	23046000	32677000	19653000	45296000		22454000	14511000	33894600	25478500	1.33032	-	0.257566
Q9UBL3	ASH2L	sp|Q9UBL3|ASH2L_HUMAN Set1/Ash2 histone methyltransferase complex subunit ASH2 OS=Homo sapiens OX=9606 GN=ASH2L PE=1 SV=1	1	7	7	7	14.3	68.722	26210000	31738000	45364000	18574000		26283000	18106000		24340000		30471500	2.29097e+07	1.33007	-	0.329148
O43837	IDH3B	sp|O43837|IDH3B_HUMAN Isocitrate dehydrogenase [NAD] subunit beta, mitochondrial OS=Homo sapiens OX=9606 GN=IDH3B PE=1 SV=2	1	10	10	10	29.4	42.183	215770000	190890000	184180000	237900000	153510000	123750000	160490000	164000000	161700000	128810000	196450000	147750000	1.32961	-	0.0201448
Q9Y5L4	TIMM13	sp|Q9Y5L4|TIM13_HUMAN Mitochondrial import inner membrane translocase subunit Tim13 OS=Homo sapiens OX=9606 GN=TIMM13 PE=1 SV=1	1	4	4	4	46.3	10.5	61777000	63114000	31316000	67965000	28494000	39363000	49355000	43334000	34119000	23895000	50533200	38013200	1.32936	-	0.225403
Q13641	TPBG	sp|Q13641|TPBG_HUMAN Trophoblast glycoprotein OS=Homo sapiens OX=9606 GN=TPBG PE=1 SV=1	1	4	4	4	8.8	46.031			67253000	137280000	82208000	52391000	44930000		140680000	49608000	9.55803e+07	71902250	1.32931	-	0.498999
P12931;P08581;Q04912;Q9H3Y6	SRC	sp|P12931|SRC_HUMAN Proto-oncogene tyrosine-protein kinase Src OS=Homo sapiens OX=9606 GN=SRC PE=1 SV=3	4	12	12	7	21.8	59.834	319220000	262160000	186490000	379030000	206700000	186970000	230010000	172760000	215450000	213400000	270720000	203718000	1.3289	-	0.108464
P49840	GSK3A	sp|P49840|GSK3A_HUMAN Glycogen synthase kinase-3 alpha OS=Homo sapiens OX=9606 GN=GSK3A PE=1 SV=2	1	8	3	3	16.8	50.98	72503000	50523000	43214000	56757000	37916000	34732000	54988000		35773000	31588000	52182600	39270250	1.32881	-	0.161653
Q16698	DECR1	sp|Q16698|DECR_HUMAN 2,4-dienoyl-CoA reductase [(3E)-enoyl-CoA-producing], mitochondrial OS=Homo sapiens OX=9606 GN=DECR1 PE=1 SV=1	1	16	16	16	53.4	36.067	613010000	423100000	264370000	546190000	278570000	288350000	585230000	197630000	343870000	184540000	425048000	319924000	1.32859	-	0.326713
Q09161	NCBP1	sp|Q09161|NCBP1_HUMAN Nuclear cap-binding protein subunit 1 OS=Homo sapiens OX=9606 GN=NCBP1 PE=1 SV=1	1	9	9	9	17.1	91.838	75878000	64093000	83540000	56036000	55763000	62093000	54253000		49337000	36540000	67062000	50555750	1.3265	-	0.0727942
O43670	ZNF207	sp|O43670|ZN207_HUMAN BUB3-interacting and GLEBS motif-containing protein ZNF207 OS=Homo sapiens OX=9606 GN=ZNF207 PE=1 SV=1	1	5	5	5	15.7	50.75	2148200000	2071000000	1815800000	1994100000	975890000	1568100000	1510200000	1580200000	1638100000	493960000	1800998000	1358112000	1.3261	-	0.183799
Q14160	SCRIB	sp|Q14160|SCRIB_HUMAN Protein scribble homolog OS=Homo sapiens OX=9606 GN=SCRIB PE=1 SV=5	1	14	14	12	11.8	174.91	127530000	116290000	82065000	208440000	69773000	91083000	171540000	47291000	81896000	63803000	120819600	91122600	1.3259	-	0.386969
Q9NQW7	XPNPEP1	sp|Q9NQW7|XPP1_HUMAN Xaa-Pro aminopeptidase 1 OS=Homo sapiens OX=9606 GN=XPNPEP1 PE=1 SV=3	1	17	17	16	35	69.917	224340000	220980000	158550000	193330000	135300000	152090000	200380000	136670000	124220000	90401000	186500000	140752200	1.32502	-	0.105581
P61758	VBP1	sp|P61758|PFD3_HUMAN Prefoldin subunit 3 OS=Homo sapiens OX=9606 GN=VBP1 PE=1 SV=4	1	7	7	7	36	22.626	108940000	106590000	105510000	140190000	84248000	70441000	109180000	71192000	84614000	76438000	109095600	82373000	1.32441	-	0.0481266
Q13011	ECH1	sp|Q13011|ECH1_HUMAN Delta(3,5)-Delta(2,4)-dienoyl-CoA isomerase, mitochondrial OS=Homo sapiens OX=9606 GN=ECH1 PE=1 SV=2	1	15	15	15	56.1	35.816	424540000	1446100000	1936800000	1853300000	1262000000	544440000	1600300000	881850000	1512100000	688950000	1384548000	1045528000	1.32426	-	0.355993
Q9HCC0	MCCC2	sp|Q9HCC0|MCCB_HUMAN Methylcrotonoyl-CoA carboxylase beta chain, mitochondrial OS=Homo sapiens OX=9606 GN=MCCC2 PE=1 SV=1	1	7	7	7	16.3	61.332	91587000	90099000	58191000	71721000	65500000	66120000	82810000	39446000	52341000	44229000	75419600	56989200	1.3234	-	0.111796
P35613	BSG	sp|P35613|BASI_HUMAN Basigin OS=Homo sapiens OX=9606 GN=BSG PE=1 SV=2	1	6	6	6	17.9	42.2	111650000	198080000	177960000	372380000	143510000	154460000	164240000	154630000	135990000	149040000	200716000	151672000	1.32336	-	0.313714
P33316	DUT	sp|P33316|DUT_HUMAN Deoxyuridine 5-triphosphate nucleotidohydrolase, mitochondrial OS=Homo sapiens OX=9606 GN=DUT PE=1 SV=4	1	5	5	5	24.6	26.563	100810000	167240000	159670000	268800000	104330000	192980000	171640000	51339000	116080000	73575000	160170000	121122800	1.32238	-	0.367056
Q01780	EXOSC10	sp|Q01780|EXOSX_HUMAN Exosome component 10 OS=Homo sapiens OX=9606 GN=EXOSC10 PE=1 SV=2	1	7	7	7	9.5	100.83	22655000	38772000	23652000	40153000		18151000	36035000		16843000		31308000	2.36763e+07	1.32233	-	0.362413
O75695	RP2	sp|O75695|XRP2_HUMAN Protein XRP2 OS=Homo sapiens OX=9606 GN=RP2 PE=1 SV=4	1	7	7	7	21.7	39.641	88655000	97592000	62167000	68646000	70674000	51423000	81649000	61881000	55841000	42429000	77546800	58644600	1.32232	-	0.0780285
Q5K4L6	SLC27A3	sp|Q5K4L6|S27A3_HUMAN Long-chain fatty acid transport protein 3 OS=Homo sapiens OX=9606 GN=SLC27A3 PE=1 SV=4	1	7	7	7	11	73.55	30206000	26339000	33925000	61337000		20107000	34257000		31195000	29323000	37951750	28720500	1.32142	-	0.31974
P23284	PPIB	sp|P23284|PPIB_HUMAN Peptidyl-prolyl cis-trans isomerase B OS=Homo sapiens OX=9606 GN=PPIB PE=1 SV=2	1	13	13	13	49.1	23.742	1919800000	2090400000	1938600000	3438300000	2095200000	1744000000	2053300000	1658700000	1686500000	1548800000	2296460000	1738260000	1.32113	-	0.0998988
Q5VYK3	ECPAS	sp|Q5VYK3|ECM29_HUMAN Proteasome adapter and scaffold protein ECM29 OS=Homo sapiens OX=9606 GN=ECPAS PE=1 SV=2	1	20	20	20	13.9	204.29	897510000	874270000	1213300000	1659100000	1136200000	800120000	925500000	692530000	831850000	1125400000	1156076000	875080000	1.32111	-	0.116196
Q96IJ6	GMPPA	sp|Q96IJ6|GMPPA_HUMAN Mannose-1-phosphate guanyltransferase alpha OS=Homo sapiens OX=9606 GN=GMPPA PE=1 SV=1	1	7	7	7	22.6	46.291	151670000	120470000	100830000	90359000	116250000	81566000	103850000	95642000	114770000	43341000	115915800	87833800	1.31972	-	0.121033
P62314	SNRPD1	sp|P62314|SMD1_HUMAN Small nuclear ribonucleoprotein Sm D1 OS=Homo sapiens OX=9606 GN=SNRPD1 PE=1 SV=1	1	4	4	4	37.8	13.281	493580000	583950000	586400000	508950000	424560000	472140000	593490000	217820000	457440000	227650000	519488000	393708000	1.31948	-	0.153211
P09211	GSTP1	sp|P09211|GSTP1_HUMAN Glutathione S-transferase P OS=Homo sapiens OX=9606 GN=GSTP1 PE=1 SV=2	1	12	12	12	66.2	23.356	3657800000	2725100000	2764000000	3255500000	2821900000	2557800000	2322400000	1017900000	3894600000	1745500000	3044860000	2307640000	1.31947	-	0.18668
O15144	ARPC2	sp|O15144|ARPC2_HUMAN Actin-related protein 2/3 complex subunit 2 OS=Homo sapiens OX=9606 GN=ARPC2 PE=1 SV=1	1	18	18	18	62.3	34.333	2690800000	2274700000	2161900000	1845400000	2143000000	1657200000	2144600000	1732200000	1182200000	1709000000	2223160000	1685040000	1.31935	-	0.0305135
P62244	RPS15A	sp|P62244|RS15A_HUMAN 40S ribosomal protein S15a OS=Homo sapiens OX=9606 GN=RPS15A PE=1 SV=2	1	7	7	7	58.5	14.839	3363000000	4085000000	2470500000	4007300000	2089600000	2840100000	3202800000	1612700000	2470000000	2020500000	3203080000	2429220000	1.31856	-	0.153943
Q8IZL8	PELP1	sp|Q8IZL8|PELP1_HUMAN Proline-, glutamic acid- and leucine-rich protein 1 OS=Homo sapiens OX=9606 GN=PELP1 PE=1 SV=2	1	9	9	9	10.7	119.7	24829000	39687000	45752000	50369000	29584000	29204000	30519000		32012000	23728000	38044200	28865750	1.31797	-	0.149275
P48643	CCT5	sp|P48643|TCPE_HUMAN T-complex protein 1 subunit epsilon OS=Homo sapiens OX=9606 GN=CCT5 PE=1 SV=1	1	36	36	36	59.9	59.67	747300000	924380000	871030000	927700000	652190000	685800000	795770000	551080000	627340000	468710000	824520000	625740000	1.31767	-	0.0339857
P29373	CRABP2	sp|P29373|RABP2_HUMAN Cellular retinoic acid-binding protein 2 OS=Homo sapiens OX=9606 GN=CRABP2 PE=1 SV=2	1	9	9	9	47.8	15.693	177130000	490760000	465530000	204000000	690170000	317290000	695030000	275420000	191890000	59489000	405518000	307823800	1.31737	-	0.514721
Q9NYK5	MRPL39	sp|Q9NYK5|RM39_HUMAN 39S ribosomal protein L39, mitochondrial OS=Homo sapiens OX=9606 GN=MRPL39 PE=1 SV=3	1	8	8	8	30.5	38.711	33314000	69449000	52185000	44042000	22228000		51020000	26883000	22854000		44243600	3.35857e+07	1.31734	-	0.427673
Q96BP3	PPWD1	sp|Q96BP3|PPWD1_HUMAN Peptidylprolyl isomerase domain and WD repeat-containing protein 1 OS=Homo sapiens OX=9606 GN=PPWD1 PE=1 SV=1	1	7	7	7	11.9	73.574	33496000	29203000	43672000	40262000	24856000	28789000	23028000	24833000	27555000		34297800	26051250	1.31655	-	0.0832834
P53396	ACLY	sp|P53396|ACLY_HUMAN ATP-citrate synthase OS=Homo sapiens OX=9606 GN=ACLY PE=1 SV=3	1	38	38	38	39.2	120.84	243130000	459330000	263490000	374480000	239630000	211830000	328320000	285200000	215290000	160080000	316012000	240144000	1.31593	-	0.187762
Q07021	C1QBP	sp|Q07021|C1QBP_HUMAN Complement component 1 Q subcomponent-binding protein, mitochondrial OS=Homo sapiens OX=9606 GN=C1QBP PE=1 SV=1	1	5	5	5	35.5	31.362	890630000	1072400000	1171400000	1369500000	741480000	796590000	1312100000	450930000	913600000	513240000	1049082000	797292000	1.31581	-	0.220272
P67936	TPM4	sp|P67936|TPM4_HUMAN Tropomyosin alpha-4 chain OS=Homo sapiens OX=9606 GN=TPM4 PE=1 SV=3	1	26	14	11	73.4	28.521	5531600000	2509700000	5204700000	4159300000	5149100000	4463200000	3056600000	3136700000	3210800000	3290700000	4510880000	3431600000	1.31451	-	0.114334
Q96DB5	RMDN1	sp|Q96DB5|RMD1_HUMAN Regulator of microtubule dynamics protein 1 OS=Homo sapiens OX=9606 GN=RMDN1 PE=1 SV=1	1	6	6	6	17.2	35.808	72704000	70777000	47908000	49544000		39904000	63926000		47313000	32172000	60233250	45828750	1.31431	-	0.180443
P31749	AKT1	sp|P31749|AKT1_HUMAN RAC-alpha serine/threonine-protein kinase OS=Homo sapiens OX=9606 GN=AKT1 PE=1 SV=2	1	10	10	8	25.8	55.686	54845000	27089000	31654000	37960000		30119000	25025000		31376000		37887000	28840000	1.3137	-	0.274288
Q92796	DLG3	sp|Q92796|DLG3_HUMAN Disks large homolog 3 OS=Homo sapiens OX=9606 GN=DLG3 PE=1 SV=2	1	5	4	4	9.4	90.313	17436000	24959000		47791000	18147000		21822000	14042000	25997000		27083250	2.06203e+07	1.31342	-	0.50057
Q9H8Y8	GORASP2	sp|Q9H8Y8|GORS2_HUMAN Golgi reassembly-stacking protein 2 OS=Homo sapiens OX=9606 GN=GORASP2 PE=1 SV=3	1	3	3	2	6.2	47.145	146390000	89876000		124240000		112320000	128780000	53750000		71247000	1.20169e+08	91524250	1.31297	-	0.300629
Q14166	TTLL12	sp|Q14166|TTL12_HUMAN Tubulin--tyrosine ligase-like protein 12 OS=Homo sapiens OX=9606 GN=TTLL12 PE=1 SV=2	1	20	20	20	41	74.403	104510000	207280000	121260000	171990000	111440000	96985000	197870000	74954000	124000000	52119000	143296000	109185600	1.31241	-	0.318702
Q9UI08	EVL	sp|Q9UI08|EVL_HUMAN Ena/VASP-like protein OS=Homo sapiens OX=9606 GN=EVL PE=1 SV=2	1	7	7	7	17.5	44.619	59404000	95169000	51506000	51275000	44194000	37069000	83371000	26868000	36552000		60309600	45965000	1.31208	-	0.375008
[truncated: 1,574 more rows]

## Sheet: Test_g VS Control_g有无差异分析
Protein IDs	Gene Name	Fasta headers	Number of proteins	Peptides	Razor + unique peptides	Unique peptides	Sequence coverage [%]	Mol. weight [kDa]	LFQ intensity CC_1	LFQ intensity CC_2	LFQ intensity CC_3	LFQ intensity CC_4	LFQ intensity CC_5	LFQ intensity Cnt_1	LFQ intensity Cnt_2	LFQ intensity Cnt_3	LFQ intensity Cnt_4	LFQ intensity Cnt_5
[truncated: 153 more rows]
